# Supplementary material
Source: Research Square preprint supplement (doi:10.21203/rs.3.rs-5240487/v1)
Supplement: Supplementary file 2 [file 8b1239e00e210d217035cfdc.xlsx]

## Sheet: Sheet1
Protein IDs	Majority protein IDs	Peptide counts (all)	Peptide counts (razor+unique)	Peptide counts (unique)	Protein names	Gene names	Fasta headers	Number of proteins	Peptides	Razor + unique peptides	Unique peptides	Sequence coverage [%]	Unique + razor sequence coverage [%]	Unique sequence coverage [%]	Mol. weight [kDa]	Sequence length	Sequence lengths	Q-value	Score	Intensity	MS/MS count	Only identified by site	Reverse	Potential contaminant	id	Peptide IDs	Peptide is razor	Mod. peptide IDs	Evidence IDs	MS/MS IDs	Best MS/MS	Oxidation (M) site IDs	Phospho (STY) site IDs	Oxidation (M) site positions	Phospho (STY) site positions
A0A0C4DH55;P01624	A0A0C4DH55;P01624	1;1	1;1	1;1	Ig kappa chain V-III region POM	IGKV3D-7	sp|A0A0C4DH55|KVD07_HUMAN Immunoglobulin kappa variable 3D-7 OS=Homo sapiens OX=9606 GN=IGKV3D-7 PE=3 SV=5;sp|P01624|KV315_HUMAN Immunoglobulin kappa variable 3-15 OS=Homo sapiens OX=9606 GN=IGKV3-15 PE=1 SV=2	2	1	1	1	7.6	7.6	7.6	13.148	119	119;115	0	2.161	49470000	2				0	4968	TRUE	5075	6727;6728	6989;6990	6989
A0AV96	A0AV96	3	3	3	RNA-binding protein 47	RBM47	sp|A0AV96|RBM47_HUMAN RNA-binding protein 47 OS=Homo sapiens OX=9606 GN=RBM47 PE=1 SV=2	1	3	3	3	7.6	7.6	7.6	64.098	593	593	0	8.3974	39992000	4				1	3876;5954;8582	True;True;True	3964;6089;8816	5215;8019;11743;11744	5413;8319;12239;12240	5413;8319;12240
A0FGR8	A0FGR8	1	1	1	Extended synaptotagmin-2	ESYT2	sp|A0FGR8|ESYT2_HUMAN Extended synaptotagmin-2 OS=Homo sapiens OX=9606 GN=ESYT2 PE=1 SV=1	1	1	1	1	1.4	1.4	1.4	102.36	921	921	0	2.7205	3134200	1				2	4889	TRUE	4992	6601	6858	6858
A0JD37	A0JD37	1	1	1		hDV103S1	sp|A0JD37|TRDV3_HUMAN T cell receptor delta variable 3 OS=Homo sapiens OX=9606 GN=TRDV3 PE=1 SV=1	1	1	1	1	14.2	14.2	14.2	12.98	113	113	1	-2	0	0	+			3	3239	TRUE	3312	4359	4535	4535		85		90
A5YKK6	A5YKK6	4	4	4	CCR4-NOT transcription complex subunit 1	CNOT1	sp|A5YKK6|CNOT1_HUMAN CCR4-NOT transcription complex subunit 1 OS=Homo sapiens OX=9606 GN=CNOT1 PE=1 SV=2	1	4	4	4	2.1	2.1	2.1	266.94	2376	2376	0	4.2028	12002000	3				4	932;1696;5921;7015	True;True;True;True	955;1734;6055;7190	1248;2262;7980;9585	1286;2344;8280;9977	1286;2344;8280;9977
A6NFI3	A6NFI3	1	1	1	Zinc finger protein 316	ZNF316	sp|A6NFI3|ZN316_HUMAN Zinc finger protein 316 OS=Homo sapiens OX=9606 GN=ZNF316 PE=1 SV=1	1	1	1	1	1.6	1.6	1.6	108.44	1004	1004	0.0022338	0.91949	14367000	1				5	2066	TRUE	2113	2752	2861	2861
A6NHR9	A6NHR9	4	4	4	Structural maintenance of chromosomes flexible hinge domain-containing protein 1	SMCHD1	sp|A6NHR9|SMHD1_HUMAN Structural maintenance of chromosomes flexible hinge domain-containing protein 1 OS=Homo sapiens OX=9606 GN=SMCHD1 PE=1 SV=2	1	4	4	4	2.7	2.7	2.7	226.37	2005	2005	0	7.6468	25660000	4				6	535;2418;5241;7757	True;True;True;True	549;2474;5353;7965	696;3217;7082;10620	711;3352;7354;11070	711;3352;7354;11070
REV__Q9H972;A6NLJ0;Q8NCU7;O75161	REV__Q9H972;A6NLJ0;Q8NCU7;O75161	1;1;1;1	1;1;1;1	1;1;1;1	C2 calcium-dependent domain-containing protein 4B;C2 calcium-dependent domain-containing protein 4A;Nephrocystin-4	C2CD4B;C2CD4A;NPHP4	sp|Q9H972|CN093_HUMAN Uncharacterized protein C14orf93 OS=Homo sapiens OX=9606 GN=C14orf93 PE=1 SV=1;sp|A6NLJ0|C2C4B_HUMAN C2 calcium-dependent domain-containing protein 4B OS=Homo sapiens OX=9606 GN=C2CD4B PE=2 SV=1;sp|Q8NCU7|C2C4A_HUMAN C2 calcium-depend	4	1	1	1	1.6	1.6	1.6	58.696	538	538;364;369;1426	0	1.7586	11798000	1				7	5305	TRUE	5418	7166	7442	7442
A7KAX9	A7KAX9	1	1	1	Rho GTPase-activating protein 32	ARHGAP32	sp|A7KAX9|RHG32_HUMAN Rho GTPase-activating protein 32 OS=Homo sapiens OX=9606 GN=ARHGAP32 PE=1 SV=1	1	1	1	1	0.6	0.6	0.6	230.53	2087	2087	0.00079681	1.4592	0	1				8	8220	TRUE	8447	11264	11743	11743
P26583;B2RPK0;P09429	P26583;B2RPK0;P09429	1;1;1	1;1;1	1;1;1	High mobility group protein B2;Putative high mobility group protein B1-like 1;High mobility group protein B1	HMGB2;HMGB1P1;HMGB1	sp|P26583|HMGB2_HUMAN High mobility group protein B2 OS=Homo sapiens OX=9606 GN=HMGB2 PE=1 SV=2;sp|B2RPK0|HGB1A_HUMAN Putative high mobility group protein B1-like 1 OS=Homo sapiens OX=9606 GN=HMGB1P1 PE=5 SV=1;sp|P09429|HMGB1_HUMAN High mobility group prot	3	1	1	1	5.7	5.7	5.7	24.033	209	209;211;215	0	12.288	33852000	1				9	5736	TRUE	5863	7731	8023	8023
CON__A2A5Y0;CON__REFSEQ:XP_986630;CON__Q9UE12;CON__Q15323;Q15323;CON__O76011;CON__Q8IUT8;O76011	CON__A2A5Y0;CON__REFSEQ:XP_986630	7;5;3;3;3;1;1;1	6;4;2;2;2;1;1;1	1;1;0;0;0;0;0;0			;	8	7	6	1	25.2	23.6	3.6	47.117	416	416;476;416;416;416;394;436;436	0	34.201	68433000	5			+	10	2051;4352;5117;5868;6052;6799;9227	True;False;True;True;True;True;True	2098;4446;5226;6001;6189;6961;9469	2733;5872;5873;5874;5875;5876;6903;7906;8155;9260;12552	2842;6086;6087;6088;6089;6090;6091;6092;7168;8203;8471;9632;13067	2842;6087;7168;8203;8471;9632;13067
CON__A2I7N0;CON__A2I7N1	CON__A2I7N0;CON__A2I7N1	8;6	8;6	3;2			;	2	8	8	3	22.4	22.4	7.5	46.311	411	411;411	0	15.741	72157000	8			+	11	1358;2966;3506;6621;7978;8147;8529;8530	True;True;True;True;True;True;True;True	1391;3036;3586;6773;8198;8372;8761;8762	1798;4001;4743;9020;10932;11166;11681;11682	1858;4163;4928;9387;11396;11641;12176;12177	1858;4163;4928;9387;11396;11641;12176;12177	0;1		237;238
CON__A2I7N3;CON__REFSEQ:XP_001252647	CON__A2I7N3;CON__REFSEQ:XP_001252647	3;2	3;2	3;2			;	2	3	3	3	8.4	8.4	8.4	46.941	417	417;417	0	3.0537	17298000	3			+	12	1101;2427;8383	True;True;True	1124;2484;8613	1454;3230;11483	1499;3365;11971	1499;3365;11971	2;3		240;241
CON__ENSEMBL:ENSBTAP00000014147	CON__ENSEMBL:ENSBTAP00000014147	6	5	5				1	6	5	5	53.1	53.1	53.1	11.756	113	113	0	30.645	3549400000	9			+	13	6228;7665;7666;8515;8695;9074	False;True;True;True;True;True	6370;7870;7871;8746;8930;9313	8418;10500;10501;11663;11664;11665;11884;12369;12370	8751;10946;10947;12157;12158;12159;12382;12878;12879;12880	8751;10946;10947;12159;12382;12878
CON__Q3MHN5;CON__ENSEMBL:ENSBTAP00000018229	CON__Q3MHN5;CON__ENSEMBL:ENSBTAP00000018229	1;1	1;1	1;1			;	2	1	1	1	4.6	4.6	4.6	53.341	474	474;475	0.0076019	0.57858	3074400	1			+	14	8614	TRUE	8848	11783	12280	12280
CON__ENSEMBL:ENSBTAP00000018574	CON__ENSEMBL:ENSBTAP00000018574	1	1	1				1	1	1	1	2	2	2	55.207	496	496	0.0022026	0.85106	5616000	1			+	15	429	TRUE	442	567	580	580
CON__ENSEMBL:ENSBTAP00000024146;P20742	CON__ENSEMBL:ENSBTAP00000024146	11;1	11;1	11;1				2	11	11	11	12.8	12.8	12.8	164.34	1477	1477;1482	0	30.342	108730000	12			+	16	443;665;1026;1170;1351;3021;3445;3847;5816;7874;8276	True;True;True;True;True;True;True;True;True;True;True	456;682;1049;1195;1383;3092;3525;3935;5949;8088;8503	585;867;1367;1549;1789;1790;4067;4676;5179;7838;10781;11335	598;888;1412;1597;1849;1850;4232;4861;5375;8131;11239;11819	598;888;1412;1597;1849;4232;4861;5375;8131;11239;11819
CON__ENSEMBL:ENSBTAP00000024462	CON__ENSEMBL:ENSBTAP00000024462	12	12	9				1	12	12	9	57.5	57.5	36.8	46.543	419	419	0	180.64	21923000000	47			+	17	871;1908;1909;1910;5859;6085;6514;6917;7336;7411;7412;7947	True;True;True;True;True;True;True;True;True;True;True;True	892;1950;1951;1952;5992;6223;6224;6662;7088;7089;7527;7603;7604;8166	1160;2539;2540;2541;2542;2543;2544;2545;2546;7890;8220;8221;8222;8223;8224;8225;8226;8877;8878;9424;9425;9426;9427;9428;9429;9430;9431;9432;9433;9434;9435;10023;10024;10113;10114;10115;10116;10117;10882;10883	1191;1192;2637;2638;2639;2640;2641;2642;2643;2644;2645;2646;2647;2648;2649;2650;8185;8544;8545;8546;8547;8548;8549;8550;9243;9244;9808;9809;9810;9811;9812;9813;9814;9815;9816;9817;9818;9819;9820;9821;10446;10447;10540;10541;10542;10543;10544;11340;11341	1191;2637;2638;2643;8185;8550;9243;9819;10447;10541;10543;11341	4;5		67;189
CON__ENSEMBL:ENSBTAP00000024466	CON__ENSEMBL:ENSBTAP00000024466	6	3	3				1	6	3	3	38.4	21.2	21.2	43.9	401	401	0	137.12	5277000000	25			+	18	1908;5859;6085;6916;7295;8876	False;False;False;True;True;True	1950;5992;6223;6224;7086;7087;7484;7485;9111	2539;7890;8220;8221;8222;8223;8224;8225;8226;9411;9412;9413;9414;9415;9416;9417;9418;9419;9420;9421;9422;9423;9968;9969;9970;9971;9972;12103	2637;8185;8544;8545;8546;8547;8548;8549;8550;9790;9791;9792;9793;9794;9795;9796;9797;9798;9799;9800;9801;9802;9803;9804;9805;9806;9807;10387;10388;10389;10390;10391;10392;12603	2637;8185;8550;9799;10391;12603	4;6;7		32;67;312
CON__ENSEMBL:ENSBTAP00000031900;P00450	CON__ENSEMBL:ENSBTAP00000031900	13;1	13;1	13;1				2	13	13	13	20.1	20.1	20.1	121.45	1064	1064;1065	0	41.56	210120000	16			+	19	39;561;826;981;1077;1090;1171;2937;3118;4132;5603;6322;7982	True;True;True;True;True;True;True;True;True;True;True;True;True	40;575;846;1004;1100;1113;1196;3007;3189;4222;5719;6467;8202	47;725;1103;1311;1425;1426;1443;1550;3965;4188;4189;5551;5552;7546;8595;10938;10939	48;740;1133;1350;1470;1471;1488;1598;4127;4358;4359;5758;5759;7829;8951;11402;11403	48;740;1133;1350;1471;1488;1598;4127;4358;5759;7829;8951;11402
CON__ENSEMBL:ENSBTAP00000033053;CON__ENSEMBL:ENSBTAP00000011227;CON__Q1RMK2	CON__ENSEMBL:ENSBTAP00000033053	3;1;1	3;1;1	3;1;1				3	3	3	3	19.4	19.4	19.4	14.759	139	139;137;597	0	22.601	896260000	4			+	20	1974;1975;6231	True;True;True	2017;2018;6373	2631;2632;2633;8421	2737;2738;2739;8754	2737;2738;8754
CON__ENSEMBL:ENSP00000377550;P13646;CON__P13646-1	CON__ENSEMBL:ENSP00000377550;P13646;CON__P13646-1	9;9;8	2;2;2	0;0;0	Keratin, type I cytoskeletal 13	KRT13	;sp|P13646|K1C13_HUMAN Keratin, type I cytoskeletal 13 OS=Homo sapiens OX=9606 GN=KRT13 PE=1 SV=4;	3	9	2	0	17.9	4.5	0	45.771	420	420;458;458	0	2.7587	1774700000	2			+	21	4352;4569;4869;6504;6712;7764;7879;8353;8426	False;False;True;False;False;False;False;True;False	4446;4666;4972;6651;6872;7972;7973;8093;8582;8657	5872;5873;5874;5875;5876;6156;6577;8860;8861;9153;9154;10628;10629;10630;10631;10632;10633;10634;10635;10786;10787;11444;11445;11553	6086;6087;6088;6089;6090;6091;6092;6386;6834;9224;9225;9523;9524;11078;11079;11080;11081;11082;11083;11084;11085;11086;11087;11088;11089;11244;11245;11931;11932;12047	6087;6386;6834;9225;9524;11082;11245;11931;12047	8		341
CON__P00711	CON__P00711	6	6	6				1	6	6	6	77.2	77.2	77.2	14.186	123	123	0	21.525	167810000	9			+	22	980;2293;3145;4021;4514;8273	True;True;True;True;True;True	1003;2345;2346;3216;4109;4610;8500	1310;3050;3051;4224;5397;5398;6077;11331;11332	1349;3176;3177;4396;5602;5603;6302;11815;11816	1349;3177;4396;5603;6302;11815	9		90
CON__P00761	CON__P00761	7	7	7				1	7	7	7	37.7	37.7	37.7	24.409	231	231	0	200.63	6697000000	14			+	23	3672;3673;4667;5324;7262;8109;8132	True;True;True;True;True;True;True	3753;3754;3755;4768;5437;7449;8332;8355	4951;4952;4953;4954;4955;4956;6305;6306;6307;7189;9927;11118;11145	5142;5143;5144;5145;5146;5147;6540;6541;6542;6543;6544;7465;10344;11591;11592;11619	5144;5147;6542;7465;10344;11591;11619	10		94
CON__P01966	CON__P01966	1	1	1				1	1	1	1	10.6	10.6	10.6	15.184	142	142	0.0029028	0.79698	8314800	0			+	24	8269	TRUE	8496	11325	11808	11808
CON__P02533;P02533;CON__Q6IFX2;CON__Q61782;CON__Q8N1A0;CON__Q7Z3Y9;Q8N1A0;Q7Z3Y9;Q9ULK0	CON__P02533;P02533	26;26;11;5;1;1;1;1;1	14;14;4;4;0;0;0;0;0	7;7;2;2;0;0;0;0;0	Keratin, type I cytoskeletal 14	KRT14	;sp|P02533|K1C14_HUMAN Keratin, type I cytoskeletal 14 OS=Homo sapiens OX=9606 GN=KRT14 PE=1 SV=4	9	26	14	7	53.4	40.7	23.3	51.621	472	472;472;452;93;295;468;295;468;1009	0	115.8	998060000	18			+	25	579;679;864;922;1575;1576;2041;3001;3013;3764;3928;4352;4443;4569;4915;5739;5740;5866;6643;6722;7527;7879;8425;8761;8762;8999	True;True;True;True;False;False;True;True;True;True;True;False;False;False;True;False;False;True;True;False;False;True;False;False;False;True	595;696;885;945;1613;1614;2087;3071;3072;3084;3849;4016;4446;4539;4666;5021;5866;5867;5868;5869;5999;6796;6883;7724;8093;8656;8995;8996;9237	755;756;897;1153;1230;2080;2081;2720;4041;4042;4058;5073;5280;5872;5873;5874;5875;5876;5993;6156;6659;6660;7734;7735;7736;7737;7738;7739;7740;7902;9054;9167;10281;10786;10787;11551;11552;11959;11960;12271	770;771;922;1184;1265;2154;2155;2829;4204;4205;4222;4223;5266;5484;6086;6087;6088;6089;6090;6091;6092;6212;6386;6920;6921;8026;8027;8028;8029;8030;8031;8032;8199;9421;9537;10717;11244;11245;12044;12045;12046;12457;12458;12775	770;922;1184;1265;2154;2155;2829;4204;4223;5266;5484;6087;6212;6386;6920;8028;8032;8199;9421;9537;10717;11245;12044;12457;12458;12775	11;12;13		212;272;368
CON__P02535-1	CON__P02535-1	16	10	9				1	16	10	9	34.6	25.3	23.7	57.769	570	570	0	109.91	225820000	13			+	26	194;407;1204;1850;4352;4565;4871;6059;6495;6504;6989;7878;8009;8426;8761;9003	True;False;True;True;False;False;True;True;False;False;True;True;True;True;False;True	201;420;1230;1890;4446;4662;4974;6197;6642;6651;7163;8092;8231;8657;8995;9241	257;539;1592;2468;2469;5872;5873;5874;5875;5876;6151;6579;6580;8164;8843;8844;8845;8860;8861;9535;10785;10980;10981;11553;11959;12276	261;552;1642;2564;2565;6086;6087;6088;6089;6090;6091;6092;6381;6836;6837;8480;9206;9207;9208;9224;9225;9927;11243;11447;11448;12047;12457;12780	261;552;1642;2565;6087;6381;6836;8480;9206;9225;9927;11243;11447;12047;12457;12780
CON__P02538;P02538;CON__P04259;CON__P48668;P48668	CON__P02538;P02538;CON__P04259;CON__P48668;P48668	20;20;19;18;18	1;1;0;0;0	1;1;0;0;0	Keratin, type II cytoskeletal 6A;Keratin, type II cytoskeletal 6C	KRT6A;KRT6C	;sp|P02538|K2C6A_HUMAN Keratin, type II cytoskeletal 6A OS=Homo sapiens OX=9606 GN=KRT6A PE=1 SV=3;;;sp|P48668|K2C6C_HUMAN Keratin, type II cytoskeletal 6C OS=Homo sapiens OX=9606 GN=KRT6C PE=1 SV=3	5	20	1	1	26.6	1.8	1.8	60.044	564	564;564;564;564;564	0.00079051	1.4057	4286700	1			+	27	643;2100;2129;2130;2305;2904;3905;4206;4394;4916;5911;5918;5919;5936;5937;6275;6442;7754;9017;9018	False;False;False;False;False;True;False;False;False;False;False;False;False;False;False;False;False;False;False;False	660;2148;2149;2179;2180;2358;2973;3993;4297;4489;5022;6045;6052;6053;6070;6071;6418;6588;7962;9255;9256	842;2792;2793;2794;2795;2796;2797;2835;2836;2837;2838;3064;3065;3918;5253;5648;5925;6661;7959;7969;7970;7971;7972;7973;7974;7975;7976;7977;7998;7999;8526;8773;10616;10617;12292;12293;12294	863;2902;2903;2904;2905;2906;2907;2952;2953;2954;2955;2956;3191;3192;4079;5451;5855;6143;6922;8259;8269;8270;8271;8272;8273;8274;8275;8276;8277;8298;8299;8880;8881;9135;11066;11067;12797;12798;12799	863;2905;2954;2956;3191;4079;5451;5855;6143;6922;8259;8270;8273;8298;8299;8881;9135;11066;12797;12798	14		452
CON__P02662	CON__P02662	10	10	10				1	10	10	10	65.8	65.8	65.8	22.975	199	199	0	52.183	1302800000	13			+	28	1903;2205;2206;3241;3315;3323;6324;8609;9121;9136	True;True;True;True;True;True;True;True;True;True	1944;1945;2255;2256;3315;3391;3399;6469;8843;9360;9375	2530;2531;2532;2533;2929;2930;2931;4365;4479;4489;8597;8598;11775;12426;12427;12442	2628;2629;2630;2631;3052;3053;3054;3055;4541;4658;4668;8953;8954;12272;12937;12938;12953	2628;3053;3054;4541;4658;4668;8954;12272;12937;12953	15	0	135	115
CON__P02663	CON__P02663	8	8	8				1	8	8	8	42.5	42.5	42.5	24.348	207	207	0	32.221	264950000	7			+	29	462;2122;2384;3974;5355;5792;7970;8363	True;True;True;True;True;True;True;True	475;2171;2440;4062;5468;5925;8190;8592	606;2824;3176;5340;7227;7805;10923;11457	619;2939;3309;5544;7503;8098;11387;11944	619;2939;3309;5544;7503;8098;11387;11944	16	86	141	144
CON__P02666	CON__P02666	3	3	3				1	3	3	3	20.1	20.1	20.1	23.583	209	209	0	96.661	649100000	6			+	30	799;1234;2405	True;True;True	818;1263;1264;2461	1062;1634;1635;1636;1637;3201;3202	1090;1686;1687;1688;1689;1690;1691;3334;3335;3336	1090;1686;3334	17	1	185	35
CON__P02668	CON__P02668	6	6	6				1	6	6	6	48.5	48.5	48.5	18.974	169	169	0	43.211	500470000	7			+	31	3314;6238;6779;7152;9107;9190	True;True;True;True;True;True	3389;3390;6380;6941;7334;9346;9431	4477;4478;8428;9234;9781;9782;12407;12507	4656;4657;8761;9606;10189;10190;12918;13020	4656;8761;9606;10190;12918;13020	18		106
CON__P02754	CON__P02754	9	9	9				1	9	9	9	71	71	71	18.281	162	162	0	93.657	1315400000	16			+	32	4828;5280;7826;7827;8077;8521;8522;8879;9140	True;True;True;True;True;True;True;True;True	4930;5393;8036;8037;8300;8752;8753;9114;9379	6497;7133;10711;10712;10713;11076;11077;11078;11079;11671;11672;12106;12107;12446;12447	6743;7409;11168;11169;11170;11548;11549;11550;11551;11552;12165;12166;12606;12607;12957;12958	6743;7409;11168;11170;11550;12165;12166;12606;12957
CON__P02768-1;P02768	CON__P02768-1;P02768	9;9	4;4	4;4	Serum albumin	ALB	;sp|P02768|ALBU_HUMAN Serum albumin OS=Homo sapiens OX=9606 GN=ALB PE=1 SV=2	2	9	4	4	14.4	8.2	8.2	69.366	609	609;609	0	5.4898	33333000	4			+	33	852;4326;5417;5456;5480;6616;8225;8610;9161	False;False;True;True;False;True;True;False;False	873;4420;5531;5570;5594;6768;8452;8844;9400	1140;5823;5824;5825;5826;5827;5828;5829;5830;5831;7304;7354;7386;7387;7388;9008;11270;11271;11776;11777;11778;11779;12469	1171;6036;6037;6038;6039;6040;6041;6042;6043;6044;7580;7631;7666;7667;7668;9375;11749;11750;12273;12274;12275;12276;12980	1171;6039;7580;7631;7668;9375;11750;12275;12980
CON__P02769	CON__P02769	55	55	50				1	55	55	50	78.4	78.4	74.5	69.293	607	607	0	323.31	51245000000	144			+	34	165;712;850;852;924;925;934;935;978;1172;1451;1513;1514;1515;2035;2088;2089;2278;2532;2895;3284;3310;3318;4326;4480;4641;4673;4674;4841;4858;4859;5455;5480;5489;5693;5813;6150;6302;6437;6510;6617;6618;6665;6921;6922;6923;7053;7485;8003;8610;8611;9090;9161;9172;9173	True;True;True;True;True;True;True;True;True;True;True;True;True;True;True;True;True;True;True;True;True;True;True;True;True;True;True;True;True;True;True;True;True;True;True;True;True;True;True;True;True;True;True;True;True;True;True;True;True;True;True;True;True;True;True	170;729;871;873;947;948;957;958;1001;1197;1488;1550;1551;1552;2080;2135;2136;2330;2590;2963;3359;3385;3394;4420;4576;4741;4774;4775;4943;4961;4962;5569;5594;5603;5816;5817;5946;6290;6446;6583;6658;6769;6770;6821;7093;7094;7095;7229;7678;8224;8225;8844;8845;9329;9400;9412;9413	220;936;1136;1137;1140;1232;1233;1234;1235;1236;1237;1238;1239;1250;1251;1252;1253;1254;1305;1306;1551;1922;1997;1998;1999;2000;2001;2002;2003;2004;2709;2777;2778;3031;3372;3900;3901;4422;4423;4424;4425;4426;4427;4428;4468;4469;4470;4482;5823;5824;5825;5826;5827;5828;5829;5830;5831;6033;6256;6257;6316;6317;6318;6319;6514;6515;6516;6559;6560;6561;6562;6563;7351;7352;7353;7386;7387;7388;7398;7399;7…	223;961;1167;1168;1171;1267;1268;1269;1270;1271;1272;1273;1274;1275;1276;1277;1288;1289;1290;1291;1292;1344;1345;1599;1993;2070;2071;2072;2073;2074;2075;2076;2077;2817;2886;2887;2888;3157;3510;4061;4062;4598;4599;4600;4601;4602;4603;4604;4605;4606;4647;4648;4649;4661;6036;6037;6038;6039;6040;6041;6042;6043;6044;6256;6490;6491;6553;6554;6555;6556;6760;6761;6762;6816;6817;6818;6819;6820;7627;7628;7…	223;961;1167;1171;1272;1277;1288;1292;1345;1599;1993;2070;2073;2076;2817;2886;2888;3157;3510;4061;4602;4648;4661;6039;6256;6491;6555;6556;6761;6817;6819;7629;7668;7681;7962;8128;8641;8925;9128;9237;9377;9383;9455;9827;9828;9831;10046;10645;11436;12275;12277;12899;12980;12995;12997	19;20		469;571
CON__P05784;CON__Q14525;CON__Q14532;CON__A2AB72;CON__O76015;CON__O76013;CON__O76014;CON__Q2M2I5;Q14525;Q14532;O76014;O76015;O76013;Q2M2I5	CON__P05784	20;1;1;1;1;1;1;1;1;1;1;1;1;1	3;0;0;0;0;0;0;0;0;0;0;0;0;0	3;0;0;0;0;0;0;0;0;0;0;0;0;0				14	20	3	3	40.4	17.5	17.5	47.538	423	423;404;448;453;456;467;471;525;404;448;449;456;467;525	0.00078309	1.3165	1710000000	6			+	35	1582;3770;3878;4001;4352;4443;4525;5202;5203;5204;6264;7033;7034;8395;8396;8404;8664;9032;9116;9264	False;False;False;False;False;False;False;False;False;False;False;False;False;False;False;False;True;False;True;True	1620;3855;3856;3966;4089;4446;4539;4621;5313;5314;5315;5316;6407;7209;7210;8625;8626;8634;8635;8899;9270;9271;9355;9506	2121;2122;5079;5080;5081;5082;5083;5218;5376;5872;5873;5874;5875;5876;5993;6090;6091;7015;7016;7017;7018;7019;7020;7021;7022;7023;7024;7025;7026;7027;7028;7029;7030;7031;7032;7033;7034;7035;7036;7037;8507;8508;8509;9617;9618;11499;11500;11501;11502;11503;11504;11505;11506;11507;11519;11520;11521;11522;11523;11524;11525;11526;11843;12317;12318;12417;12418;12419;12593	2199;2200;5272;5273;5274;5275;5276;5416;5580;5581;6086;6087;6088;6089;6090;6091;6092;6212;6315;6316;6317;7285;7286;7287;7288;7289;7290;7291;7292;7293;7294;7295;7296;7297;7298;7299;7300;7301;7302;7303;7304;7305;7306;7307;7308;7309;8859;8860;8861;8862;8863;10016;10017;11987;11988;11989;11990;11991;11992;11993;11994;11995;11996;11997;11998;12010;12011;12012;12013;12014;12015;12016;12017;12018;12019;…	2199;5274;5416;5580;6087;6212;6315;7285;7299;7308;8860;10016;10017;11989;11996;12013;12340;12825;12930;13109	21;22;23		167;206;242
CON__P05787;P05787;CON__H-INV:HIT000292931;CON__H-INV:HIT000016045;CON__Q9DCV7;CON__Q9NSB2;CON__Q6ISB0;Q9NSB2;P08670;P14136;P17661;CON__O43790;CON__Q6NT21;CON__P78385;CON__Q14533;CON__P78386;REV__Q9C0D2;O43790;P78385;Q14533;P78386	CON__P05787;P05787	61;61;28;8;7;5;5;5;3;2;2;1;1;1;1;1;1;1;1;1;1	61;61;28;8;7;5;5;5;3;2;2;1;1;1;1;1;1;1;1;1;1	37;37;16;4;0;0;0;0;0;0;0;0;0;0;0;0;1;0;0;0;0	Keratin, type II cytoskeletal 8	KRT8	;sp|P05787|K2C8_HUMAN Keratin, type II cytoskeletal 8 OS=Homo sapiens OX=9606 GN=KRT8 PE=1 SV=7	21	61	61	37	85.5	85.5	71.2	53.704	483	483;483;443;99;457;600;600;600;466;432;470;486;493;493;505;507;2601;486;493;505;507	0	323.31	176270000000	299			+	36	147;148;641;675;676;1040;1365;1366;1367;1838;1839;2100;2129;2130;2305;2731;3207;3927;4090;4091;4207;4390;4526;4527;4545;4573;4853;4854;4917;4918;5179;5272;5472;5661;5918;5919;6393;6420;6428;6429;6699;6709;6710;7016;7017;7132;7133;7232;7537;7544;7545;7698;7754;7953;8196;8288;8709;8947;9017;9018;9021	True;True;True;True;True;True;True;True;True;True;True;True;True;True;True;True;True;True;True;True;True;True;True;True;True;True;True;True;True;True;True;True;True;True;True;True;True;True;True;True;True;True;True;True;True;True;True;True;True;True;True;True;True;True;True;True;True;True;True;True;True	150;151;152;658;692;693;1063;1398;1399;1400;1401;1402;1877;1878;1879;2148;2149;2179;2180;2358;2793;2794;3279;4015;4179;4180;4181;4298;4485;4622;4623;4624;4642;4670;4671;4672;4955;4956;4957;5023;5024;5025;5290;5385;5586;5784;6052;6053;6538;6565;6573;6574;6575;6858;6868;6869;6870;7191;7192;7193;7311;7312;7313;7314;7315;7417;7734;7735;7742;7743;7744;7745;7903;7904;7962;8172;8173;8422;8516;8944;9183;…	192;193;194;195;196;197;198;839;840;880;881;882;883;884;885;886;887;888;889;890;891;892;893;1383;1805;1806;1807;1808;1809;1810;1811;1812;1813;1814;1815;1816;1817;1818;2439;2440;2441;2442;2443;2444;2445;2446;2447;2448;2449;2450;2451;2452;2453;2792;2793;2794;2795;2796;2797;2835;2836;2837;2838;3064;3065;3630;3631;3632;3633;3634;3635;3636;3637;3638;3639;3640;3641;3642;4312;5278;5279;5489;5490;5491;54…	195;196;197;198;199;200;201;857;858;859;860;861;901;902;903;904;905;906;907;908;909;910;911;912;913;914;915;916;917;918;1428;1865;1866;1867;1868;1869;1870;1871;1872;1873;1874;1875;1876;1877;1878;1879;1880;1881;1882;1883;2527;2528;2529;2530;2531;2532;2533;2534;2535;2536;2537;2538;2539;2540;2541;2542;2543;2544;2545;2546;2547;2548;2549;2902;2903;2904;2905;2906;2907;2952;2953;2954;2955;2956;3191;3192…	198;201;858;907;917;1428;1867;1876;1882;2531;2549;2905;2954;2956;3191;3785;4486;5478;5695;5699;5856;6136;6322;6325;6348;6403;6801;6812;6923;6927;7254;7393;7652;7919;8270;8273;9052;9093;9104;9112;9504;9516;9517;9980;9995;10158;10167;10295;10730;10744;10751;10996;11066;11354;11706;11838;12399;12689;12797;12798;12804	14;24;25;26;27;28;29;30;31;32;33;34;35	2;3;87;88;89	60;136;139;168;189;205;248;256;281;310;378;406;409	415;416;417;431;432
CON__P07477;Q8NHM4;P07478;P07477	CON__P07477;Q8NHM4;P07478;P07477	1;1;1;1	1;1;1;1	1;1;1;1	Putative trypsin-6;Trypsin-2;Trypsin-1;Alpha-trypsin chain 1;Alpha-trypsin chain 2	PRSS3P2;PRSS2;PRSS1	;sp|Q8NHM4|TRY6_HUMAN Putative trypsin-6 OS=Homo sapiens OX=9606 GN=PRSS3P2 PE=5 SV=2;sp|P07478|TRY2_HUMAN Trypsin-2 OS=Homo sapiens OX=9606 GN=PRSS2 PE=1 SV=1;sp|P07477|TRY1_HUMAN Trypsin-1 OS=Homo sapiens OX=9606 GN=PRSS1 PE=1 SV=1	4	1	1	1	8.1	8.1	8.1	26.558	247	247;247;247;247	0	3.1861	219040000	2			+	37	4668	TRUE	4769	6308;6309	6545;6546	6545
CON__P08727;P08727	CON__P08727;P08727	45;44	43;42	24;23	Keratin, type I cytoskeletal 19	KRT19	;sp|P08727|K1C19_HUMAN Keratin, type I cytoskeletal 19 OS=Homo sapiens OX=9606 GN=KRT19 PE=1 SV=4	2	45	43	24	90	86	63	44.091	400	400;400	0	323.31	51891000000	124			+	38	48;401;919;1137;1435;1436;1575;1576;2039;2192;2209;2235;2501;3003;3106;3724;3758;3875;4001;4077;4234;4352;4443;4569;5382;5739;5740;5864;6501;6712;6722;6850;6851;7065;7230;7231;7239;7502;7503;7504;7527;7690;7764;7924;8425	True;True;True;True;True;True;True;True;True;True;True;True;True;True;True;True;True;True;False;True;True;False;True;True;True;True;True;True;True;True;True;True;True;True;True;True;True;True;True;True;True;True;True;True;True	49;414;942;1160;1472;1473;1613;1614;2084;2085;2242;2259;2285;2559;3074;3177;3808;3843;3963;4089;4165;4325;4446;4539;4666;5495;5866;5867;5868;5869;5997;6648;6872;6883;7016;7017;7241;7414;7415;7416;7424;7696;7697;7698;7699;7700;7724;7895;7972;7973;8141;8656	67;68;69;531;532;1225;1226;1227;1496;1497;1900;1901;1902;1903;1904;2080;2081;2715;2716;2717;2718;2915;2934;2935;2936;2937;2938;2939;2940;2941;2942;2943;2944;2945;2979;3325;3326;3327;3328;4044;4045;4046;4047;4048;4176;5022;5064;5214;5376;5467;5685;5872;5873;5874;5875;5876;5993;6156;7256;7734;7735;7736;7737;7738;7739;7740;7896;7897;7898;7899;8853;8854;8855;8856;9153;9154;9167;9329;9330;9661;9662;96…	68;69;70;544;545;1259;1260;1261;1262;1541;1542;1968;1969;1970;1971;1972;1973;1974;2154;2155;2823;2824;2825;2826;2827;3038;3058;3059;3060;3061;3062;3063;3064;3065;3066;3067;3068;3069;3103;3104;3462;3463;3464;3465;3466;4207;4208;4209;4210;4211;4212;4346;5214;5257;5412;5580;5581;5673;5893;6086;6087;6088;6089;6090;6091;6092;6212;6386;7532;8026;8027;8028;8029;8030;8031;8032;8191;8192;8193;8194;8195;81…	68;545;1259;1542;1969;1974;2154;2155;2825;3038;3062;3103;3465;4210;4346;5214;5257;5412;5580;5673;5893;6087;6212;6386;7532;8028;8032;8192;9216;9524;9537;9704;9705;10064;10290;10292;10305;10675;10679;10684;10717;10979;11082;11305;12044	8;12;36;37;38		177;202;259;291;316
CON__P08779;P08779;CON__Q9Z2K1;CON__Q3ZAW8	CON__P08779;P08779	22;22;6;6	10;10;1;1	10;10;1;1	Keratin, type I cytoskeletal 16	KRT16	;sp|P08779|K1C16_HUMAN Keratin, type I cytoskeletal 16 OS=Homo sapiens OX=9606 GN=KRT16 PE=1 SV=4	4	22	10	10	49	31.5	31.5	51.267	473	473;473;469;474	0	139.96	305080000	14			+	39	578;679;923;2040;2999;3013;3620;3928;4352;4443;4569;4914;6523;6722;7502;7505;7526;7879;8425;8492;8761;8762	True;False;True;True;True;False;True;False;False;False;False;True;True;False;False;True;True;False;False;True;False;False	594;696;946;2086;3069;3084;3700;4016;4446;4539;4666;5020;6671;6883;7696;7701;7702;7723;8093;8656;8723;8995;8996	754;897;1231;2719;4038;4039;4058;4887;4888;5280;5872;5873;5874;5875;5876;5993;6156;6657;6658;8889;9167;10242;10253;10254;10255;10280;10786;10787;11551;11552;11638;11959;11960	769;922;1266;2828;4201;4202;4222;4223;5076;5077;5484;6086;6087;6088;6089;6090;6091;6092;6212;6386;6918;6919;9255;9537;10675;10676;10687;10688;10689;10716;11244;11245;12044;12045;12046;12132;12457;12458	769;922;1266;2828;4201;4223;5077;5484;6087;6212;6386;6918;9255;9537;10675;10687;10716;11245;12044;12132;12457;12458	39;40;41		239;274;353
CON__P12763	CON__P12763	6	6	6				1	6	6	6	25.3	25.3	25.3	38.418	359	359	0	46.341	172420000	6			+	40	426;602;3363;3369;6278;6483	True;True;True;True;True;True	439;618;3441;3447;6421;6630	564;785;4549;4558;8529;8829	577;800;4728;4738;8884;9192	577;800;4728;4738;8884;9192
CON__P13645;P13645;CON__Q148H6;CON__Q7Z3Y7;Q7Z3Y7;CON__Q7Z3Z0;CON__Q7Z3Y8;Q7Z3Z0;Q7Z3Y8	CON__P13645;P13645	31;31;3;3;3;2;2;2;2	29;29;2;2;2;2;2;2;2	23;23;1;1;1;1;1;1;1	Keratin, type I cytoskeletal 10	KRT10	;sp|P13645|K1C10_HUMAN Keratin, type I cytoskeletal 10 OS=Homo sapiens OX=9606 GN=KRT10 PE=1 SV=6	9	31	29	23	59.2	58	48.9	59.51	593	593;584;464;486;464;450;459;450;459	0	323.31	11925000000	68			+	41	126;127;195;407;918;1849;3026;3034;3881;4235;4352;4443;4565;4870;5865;6047;6126;6132;6495;6504;6723;6896;6988;7064;7228;7229;7654;8427;8761;8762;9002	True;True;True;True;True;True;True;True;True;True;False;False;True;True;True;True;True;True;True;True;True;True;True;True;True;True;True;True;True;True;True	127;128;129;130;202;420;941;1889;3097;3105;3969;4326;4446;4539;4662;4973;5998;6184;6265;6271;6272;6642;6651;6884;7066;7162;7240;7412;7413;7859;8658;8995;8996;9240	159;160;161;162;163;164;165;166;167;168;169;258;259;539;1224;2465;2466;2467;4073;4083;4084;5221;5222;5686;5687;5872;5873;5874;5875;5876;5993;6151;6578;7900;7901;8149;8150;8275;8276;8277;8278;8279;8286;8287;8288;8289;8290;8843;8844;8845;8860;8861;9168;9387;9532;9533;9534;9660;9874;9875;9876;10484;10485;10486;11554;11959;11960;12274;12275	162;163;164;165;166;167;168;169;170;171;172;262;263;552;1258;2561;2562;2563;4238;4239;4240;4250;4251;5419;5420;5894;5895;6086;6087;6088;6089;6090;6091;6092;6212;6381;6835;8197;8198;8462;8463;8464;8465;8600;8601;8602;8603;8604;8605;8606;8613;8614;8615;8616;8617;8618;9206;9207;9208;9224;9225;9538;9766;9924;9925;9926;10061;10286;10287;10288;10929;10930;10931;12048;12457;12458;12778;12779	164;170;262;552;1258;2563;4239;4250;5420;5895;6087;6212;6381;6835;8198;8464;8600;8616;9206;9225;9538;9766;9924;10061;10286;10288;10931;12048;12457;12458;12779	42;43;44		271;306;321
CON__P13647;P13647	CON__P13647;P13647	23;23	11;11	3;3	Keratin, type II cytoskeletal 5	KRT5	;sp|P13647|K2C5_HUMAN Keratin, type II cytoskeletal 5 OS=Homo sapiens OX=9606 GN=KRT5 PE=1 SV=3	2	23	11	3	31.9	21.2	6.1	62.378	590	590;590	0	49.14	480370000	12			+	42	2129;2130;2305;2630;3909;4206;4394;4916;5243;5918;5919;5936;5999;6276;6442;7516;7754;7925;8135;8697;9017;9018;9020	False;False;False;True;True;False;False;False;True;False;False;False;True;True;True;True;False;True;True;True;False;False;True	2179;2180;2358;2690;3997;4297;4489;5022;5355;6052;6053;6070;6135;6419;6588;7713;7962;8142;8143;8358;8359;8932;9255;9256;9258	2835;2836;2837;2838;3064;3065;3498;5257;5648;5925;6661;7084;7969;7970;7971;7972;7973;7974;7975;7976;7977;7998;8090;8527;8773;10269;10616;10617;10848;10849;11148;11149;11150;11886;12292;12293;12294;12297	2952;2953;2954;2955;2956;3191;3192;3638;5455;5855;6143;6922;7356;8269;8270;8271;8272;8273;8274;8275;8276;8277;8298;8400;8882;9135;10705;11066;11067;11306;11307;11622;11623;11624;12384;12797;12798;12799;12803	2954;2956;3191;3638;5455;5855;6143;6922;7356;8270;8273;8298;8400;8882;9135;10705;11066;11306;11622;12384;12797;12798;12803	45;46;47		274;297;303
CON__P15497;P02647	CON__P15497	6;1	6;1	6;1				2	6	6	6	28.3	28.3	28.3	30.276	265	265;267	0	26.858	112250000	7			+	43	1441;1932;4895;6336;8693;8905	True;True;True;True;True;True	1478;1974;5000;6481;8928;9141	1911;2572;6611;8614;11881;12140;12141	1982;2678;6868;8971;12379;12640;12641	1982;2678;6868;8971;12379;12640
CON__P17690	CON__P17690	3	3	3				1	3	3	3	15.7	15.7	15.7	38.252	345	345	0	14.785	33554000	3			+	44	2453;8039;8949	True;True;True	2510;8262;9185	3263;11031;12191	3400;11502;12693	3400;11502;12693
CON__P19001	CON__P19001	14	1	1				1	14	1	1	23.3	3	3	44.541	403	403	0	1.6205	0	1			+	45	415;1575;1576;3875;4001;4352;4443;4569;6712;6722;7239;7764;7924;8425	True;False;False;False;False;False;False;False;False;False;False;False;False;False	428;1613;1614;3963;4089;4446;4539;4666;6872;6883;7424;7972;7973;8141;8656	548;2080;2081;5214;5376;5872;5873;5874;5875;5876;5993;6156;9153;9154;9167;9891;9892;10628;10629;10630;10631;10632;10633;10634;10635;10847;11551;11552	561;2154;2155;5412;5580;5581;6086;6087;6088;6089;6090;6091;6092;6212;6386;9523;9524;9537;10304;10305;10306;10307;11078;11079;11080;11081;11082;11083;11084;11085;11086;11087;11088;11089;11305;12044;12045;12046	561;2154;2155;5412;5580;6087;6212;6386;9524;9537;10305;11082;11305;12044	8		319
CON__P34955	CON__P34955	6	6	6				1	6	6	6	18.3	18.3	18.3	46.103	416	416	0	25.719	131220000	6			+	46	1003;5224;5289;5424;5986;8432	True;True;True;True;True;True	1026;5336;5402;5538;6121;8663	1341;7061;7145;7312;8067;11560;11561	1383;7333;7421;7588;8376;12054;12055	1383;7333;7421;7588;8376;12055
CON__P35900;P35900;CON__Q9D312	CON__P35900;P35900	25;25;6	23;23;4	22;22;3	Keratin, type I cytoskeletal 20	KRT20	;sp|P35900|K1C20_HUMAN Keratin, type I cytoskeletal 20 OS=Homo sapiens OX=9606 GN=KRT20 PE=1 SV=1	3	25	23	22	66.3	63.7	62	48.486	424	424;424;431	0	310.1	4486200000	33			+	47	1685;1979;3058;3261;3376;4354;4569;4727;5409;5529;6382;6447;6512;6546;6713;7098;7497;7498;7499;7716;7879;7915;7928;8224;8846	True;True;True;True;True;True;False;True;True;True;True;True;True;True;True;True;True;True;True;True;False;True;True;True;True	1723;2022;3129;3335;3455;4448;4666;4828;5523;5643;6527;6593;6660;6695;6873;7276;7277;7691;7692;7693;7922;8093;8132;8146;8451;9081	2249;2250;2639;4120;4390;4391;4569;4570;5878;6156;6377;7293;7294;7448;8682;8778;8874;8875;8917;9155;9702;9703;9704;10233;10234;10235;10236;10237;10570;10786;10787;10834;10835;10854;11268;11269;12063	2330;2331;2745;4288;4566;4567;4749;4750;6094;6386;6618;7569;7570;7730;9039;9140;9240;9241;9283;9525;10104;10105;10106;10666;10667;10668;10669;10670;11019;11244;11245;11292;11293;11312;11747;11748;12563	2330;2745;4288;4566;4750;6094;6386;6618;7569;7730;9039;9140;9240;9283;9525;10104;10666;10668;10669;11019;11245;11293;11312;11748;12563	48		26
CON__P35908;P12036	CON__P35908	43;2	36;2	1;0				2	43	36	1	78.6	73.3	5.6	65.865	645	645;1026	0	251.16	2540800000	54			+	48	643;1372;1434;2129;2130;2219;2220;2307;2690;2718;2745;2749;3039;3211;3522;4206;4340;4394;4916;5727;5914;5936;5937;6127;6196;6197;6970;6986;6987;7110;7345;7430;7431;7754;7913;7914;8157;8524;8893;9017;9018;9024;9127	True;True;True;False;False;True;True;False;True;True;True;True;True;True;False;True;True;True;True;True;True;True;True;True;True;True;True;True;True;True;True;True;True;False;True;True;True;True;True;False;False;True;True	660;1407;1470;1471;2179;2180;2269;2270;2360;2751;2780;2811;2816;3110;3283;3602;4297;4434;4489;5022;5852;5853;6048;6070;6071;6266;6337;6338;7144;7160;7161;7289;7536;7622;7623;7962;8129;8130;8131;8382;8755;8756;9128;9129;9255;9256;9262;9366	842;1823;1898;1899;2835;2836;2837;2838;2957;2958;2959;2960;3067;3577;3613;3614;3679;3689;4089;4320;4763;5648;5853;5854;5925;6661;7717;7718;7963;7998;7999;8280;8281;8369;8370;8371;9507;9508;9530;9531;9720;10034;10135;10136;10137;10616;10617;10830;10831;10832;10833;11180;11181;11674;11675;12123;12124;12292;12293;12294;12304;12433	863;1888;1966;1967;2952;2953;2954;2955;2956;3081;3082;3083;3084;3194;3720;3757;3758;3759;3760;3831;3842;4256;4494;4948;5855;6066;6067;6143;6922;8006;8007;8008;8263;8298;8299;8607;8608;8700;8701;8702;9899;9900;9922;9923;10122;10457;10562;10563;10564;11066;11067;11288;11289;11290;11291;11656;11657;11658;12168;12169;12170;12623;12624;12797;12798;12799;12811;12812;12944	863;1888;1966;2954;2956;3082;3084;3194;3720;3759;3831;3842;4256;4494;4948;5855;6066;6143;6922;8006;8263;8298;8299;8608;8700;8702;9899;9922;9923;10122;10457;10562;10564;11066;11288;11291;11656;12168;12623;12797;12798;12812;12944	49;50;51;52;53;54		222;263;300;343;473;497
CON__P41361;P01008	CON__P41361;P01008	2;1	2;1	2;1	Antithrombin-III	SERPINC1	;sp|P01008|ANT3_HUMAN Antithrombin-III OS=Homo sapiens OX=9606 GN=SERPINC1 PE=1 SV=1	2	2	2	2	5.2	5.2	5.2	52.347	465	465;464	0	3.4153	14856000	2			+	49	7885;8070	True;True	8100;8293	10795;11069	11253;11541	11253;11541
CON__P50448	CON__P50448	2	2	2				1	2	2	2	6.8	6.8	6.8	51.723	468	468	0.0036023	0.73805	8960300	2			+	50	3229;6742	True;True	3301;6904	4342;9191	4518;9561	4518;9561
CON__Q04695;Q04695	CON__Q04695;Q04695	18;18	1;1	1;1	Keratin, type I cytoskeletal 17	KRT17	;sp|Q04695|K1C17_HUMAN Keratin, type I cytoskeletal 17 OS=Homo sapiens OX=9606 GN=KRT17 PE=1 SV=2	2	18	1	1	34.3	3	3	48.105	432	432;432	0	1.6718	14730000	1			+	51	404;678;864;921;1575;1576;2041;2192;3002;4352;4443;4569;5866;6722;7527;7690;7879;8425	False;True;False;False;False;False;False;False;False;False;False;False;False;False;False;False;False;False	417;695;885;944;1613;1614;2087;2242;3073;4446;4539;4666;5999;6883;7724;7895;8093;8656	535;896;1153;1229;2080;2081;2720;2915;4043;5872;5873;5874;5875;5876;5993;6156;7902;9167;10281;10530;10531;10786;10787;11551;11552	548;921;1184;1264;2154;2155;2829;3038;4206;6086;6087;6088;6089;6090;6091;6092;6212;6386;8199;9537;10717;10977;10978;10979;10980;11244;11245;12044;12045;12046	548;921;1184;1264;2154;2155;2829;3038;4206;6087;6212;6386;8199;9537;10717;10979;11245;12044	55		241
CON__Q05B55	CON__Q05B55	9	9	9				1	9	9	9	39.6	39.6	39.6	26.59	240	240	0	323.31	3458600000	21			+	52	4293;6784;7105;7353;7626;8148;8149;8912;8913	True;True;True;True;True;True;True;True;True	4386;6946;7284;7544;7831;8373;8374;9148;9149	5779;9239;9240;9241;9715;10042;10043;10044;10045;10435;10436;10437;10438;11167;11168;11169;11170;12148;12149;12150	5990;9611;9612;9613;10117;10465;10466;10467;10468;10876;10877;10878;10879;10880;11642;11643;11644;11645;11646;12648;12649;12650	5990;9613;10117;10466;10878;11642;11645;12648;12650
CON__Q29443;CON__Q0IIK2	CON__Q29443;CON__Q0IIK2	3;3	3;3	3;3			;	2	3	3	3	6	6	6	75.829	685	685;704	0	9.4001	40859000	4			+	53	1248;2155;8038	True;True;True	1278;2205;8261	1653;1654;2870;11030	1709;1710;2990;11501	1709;2990;11501
CON__Q1RMN8;A0A075B6J9;P01721;P01700;P01699;P01703	CON__Q1RMN8	9;1;1;1;1;1	9;1;1;1;1;1	8;0;0;0;0;0				6	9	9	8	42.7	42.7	39.7	24.536	234	234;118;117;117;117;118	0	193.05	8850600000	29			+	54	111;726;3047;6228;6497;6990;7177;7988;8972	True;True;True;True;True;True;True;True;True	112;744;3118;6370;6644;7164;7360;8208;9208	139;962;963;964;4101;4102;4103;4104;4105;4106;8418;8847;8848;9536;9537;9538;9539;9540;9809;9810;10946;12218;12219;12220;12221;12222;12223;12224	142;988;989;990;4268;4269;4270;4271;4272;4273;4274;8751;9210;9211;9928;9929;9930;9931;9932;10218;10219;10220;10221;11410;12721;12722;12723;12724;12725;12726;12727;12728	142;990;4274;8751;9210;9930;10219;11410;12724
CON__Q3SX09;P68871;P02042;CON__P02070;P69892;P69891;P02100	CON__Q3SX09;P68871;P02042;CON__P02070;P69892;P69891;P02100	2;2;2;1;1;1;1	2;2;2;1;1;1;1	2;2;2;1;1;1;1	Hemoglobin subunit beta;LVV-hemorphin-7;Spinorphin;Hemoglobin subunit delta;Hemoglobin subunit gamma-2;Hemoglobin subunit gamma-1;Hemoglobin subunit epsilon	HBB;HBD;HBG2;HBG1;HBE1	;sp|P68871|HBB_HUMAN Hemoglobin subunit beta OS=Homo sapiens OX=9606 GN=HBB PE=1 SV=2;sp|P02042|HBD_HUMAN Hemoglobin subunit delta OS=Homo sapiens OX=9606 GN=HBD PE=1 SV=2;;sp|P69892|HBG2_HUMAN Hemoglobin subunit gamma-2 OS=Homo sapiens OX=9606 GN=HBG2 PE=	7	2	2	2	9.5	9.5	9.5	22.06	201	201;147;147;145;147;147;147	0.0008071	1.5213	43501000	2			+	55	4766;5055	True;True	4868;5164	6426;6830	6668;7092	6668;7092
CON__Q3SX28;P67936;P07951	CON__Q3SX28;P67936;P07951	4;4;4	2;2;2	2;2;2	Tropomyosin alpha-4 chain;Tropomyosin beta chain	TPM4;TPM2	;sp|P67936|TPM4_HUMAN Tropomyosin alpha-4 chain OS=Homo sapiens OX=9606 GN=TPM4 PE=1 SV=3;sp|P07951|TPM2_HUMAN Tropomyosin beta chain OS=Homo sapiens OX=9606 GN=TPM2 PE=1 SV=1	3	4	2	2	7.7	3.9	3.9	33.012	284	284;248;284	0.0042949	0.69806	12621000	2			+	56	3860;4227;5436;6623	False;True;True;False	3948;4318;5550;6775	5193;5676;7328;9022	5389;5883;7604;9389	5389;5883;7604;9389
CON__Q3SZR3	CON__Q3SZR3	7	7	7				1	7	7	7	35.1	35.1	35.1	23.182	202	202	0	97.401	206630000	10			+	57	361;880;1674;6112;6113;8208;8899	True;True;True;True;True;True;True	374;901;1712;6251;6252;8434;9135	479;480;1169;2230;2231;8259;8260;8261;11243;11244;12131;12132	490;491;1201;2311;2312;8584;8585;8586;11721;11722;12631;12632	491;1201;2312;8585;8586;11721;12631
CON__Q3TTY5	CON__Q3TTY5	14	4	4				1	14	4	4	17.7	9.9	9.9	70.922	707	707	0	13.556	66230000	4			+	58	1433;2129;2130;2221;2690;4206;4340;4495;4916;5938;7754;7943;9017;9018	False;False;False;True;False;False;False;True;False;True;False;True;False;False	1469;2179;2180;2271;2751;4297;4434;4591;5022;6072;7962;8162;9255;9256	1897;2835;2836;2837;2838;2961;3577;5648;5853;5854;6057;6661;8000;10616;10617;10878;12292;12293;12294	1965;2952;2953;2954;2955;2956;3085;3720;5855;6066;6067;6282;6922;8300;11066;11067;11336;12797;12798;12799	1965;2954;2956;3085;3720;5855;6066;6282;6922;8300;11066;11336;12797;12798
CON__Q3ZBS7;P04004	CON__Q3ZBS7;P04004	1;1	1;1	1;1	Vitronectin;Vitronectin V65 subunit;Vitronectin V10 subunit;Somatomedin-B	VTN	;sp|P04004|VTNC_HUMAN Vitronectin OS=Homo sapiens OX=9606 GN=VTN PE=1 SV=1	2	1	1	1	3.1	3.1	3.1	54.099	484	484;478	0	1.6473	0	1			+	59	1405	TRUE	1440	1859	1925	1925
CON__Q5D862;Q5D862	CON__Q5D862;Q5D862	2;2	2;2	2;2	Filaggrin-2	FLG2	;sp|Q5D862|FILA2_HUMAN Filaggrin-2 OS=Homo sapiens OX=9606 GN=FLG2 PE=1 SV=1	2	2	2	2	1.2	1.2	1.2	248.07	2391	2391;2391	0	4.1753	10693000	2			+	60	6021;7398	True;True	6158;7590	8116;10098	8427;10523	8427;10523
CON__Q61726	CON__Q61726	6	5	5				1	6	5	5	19.4	18	18	52.809	479	479	0	76.892	97089000	7			+	61	2305;2886;3734;4284;4355;4523	False;True;True;True;True;True	2358;2954;3818;4376;4449;4619	3064;3065;3889;5034;5035;5762;5879;6087;6088	3191;3192;4050;5226;5227;5972;6095;6312;6313	3191;4050;5226;5972;6095;6313
CON__Q6IFZ6;CON__Q7Z794;Q7Z794	CON__Q6IFZ6;CON__Q7Z794;Q7Z794	9;6;6	1;1;1	1;1;1	Keratin, type II cytoskeletal 1b	KRT77	;;sp|Q7Z794|K2C1B_HUMAN Keratin, type II cytoskeletal 1b OS=Homo sapiens OX=9606 GN=KRT77 PE=2 SV=3	3	9	1	1	8.4	2.1	2.1	61.358	572	572;578;578	0	2.4728	3589500	1			+	62	2129;2130;2307;5918;5919;7013;7754;9017;9018	False;False;False;False;False;True;False;False;False	2179;2180;2360;6052;6053;7188;7962;9255;9256	2835;2836;2837;2838;3067;7969;7970;7971;7972;7973;7974;7975;7976;7977;9583;10616;10617;12292;12293;12294	2952;2953;2954;2955;2956;3194;8269;8270;8271;8272;8273;8274;8275;8276;8277;9975;11066;11067;12797;12798;12799	2954;2956;3194;8270;8273;9975;11066;12797;12798
CON__Q6KB66-1;Q6KB66;CON__Q0VBK2	CON__Q6KB66-1;Q6KB66	12;12;2	11;11;2	11;11;2	Keratin, type II cytoskeletal 80	KRT80	;sp|Q6KB66|K2C80_HUMAN Keratin, type II cytoskeletal 80 OS=Homo sapiens OX=9606 GN=KRT80 PE=1 SV=2	3	12	11	11	32.1	29.4	29.4	50.525	452	452;452;452	0	87.58	609360000	13			+	63	639;876;1157;1401;2987;4390;4415;5559;6194;7101;7436;8782	True;True;True;True;True;False;True;True;True;True;True;True	656;897;1181;1436;3057;4485;4510;5674;6335;7280;7628;9016	834;1165;1530;1854;4024;5919;5951;7490;7491;8367;9709;10146;11985;11986	850;1197;1576;1920;4187;6136;6170;7773;7774;8698;10111;10574;12483;12484	850;1197;1576;1920;4187;6136;6170;7773;8698;10111;10574;12483
CON__Q7RTS7;Q7RTS7;CON__Q32MB2;Q86Y46;CON__Q14CN4-1;CON__Q6IME9;CON__Q3SY84;Q14CN4;Q3SY84	CON__Q7RTS7;Q7RTS7;CON__Q32MB2;Q86Y46;CON__Q14CN4-1;CON__Q6IME9;CON__Q3SY84;Q14CN4;Q3SY84	6;6;5;5;4;4;4;4;4	1;1;1;1;1;1;1;1;1	1;1;1;1;1;1;1;1;1	Keratin, type II cytoskeletal 74;Keratin, type II cytoskeletal 73;Keratin, type II cytoskeletal 72;Keratin, type II cytoskeletal 71	KRT74;KRT73;KRT72;KRT71	;sp|Q7RTS7|K2C74_HUMAN Keratin, type II cytoskeletal 74 OS=Homo sapiens OX=9606 GN=KRT74 PE=1 SV=2;;sp|Q86Y46|K2C73_HUMAN Keratin, type II cytoskeletal 73 OS=Homo sapiens OX=9606 GN=KRT73 PE=1 SV=1;;;;sp|Q14CN4|K2C72_HUMAN Keratin, type II cytoskeletal 72	9	6	1	1	7.8	2.3	2.3	57.865	529	529;529;540;540;511;520;523;511;523	0	1.657	19740000	1			+	64	2129;2130;2306;4206;4392;4916	False;False;True;False;False;False	2179;2180;2359;4297;4487;5022	2835;2836;2837;2838;3066;5648;5922;6661	2952;2953;2954;2955;2956;3193;5855;6140;6922	2954;2956;3193;5855;6140;6922
CON__Q8N1N4-2;CON__Q7RTT2;Q8N1N4	CON__Q8N1N4-2;CON__Q7RTT2;Q8N1N4	7;7;7	4;4;4	4;4;4	Keratin, type II cytoskeletal 78	KRT78	;;sp|Q8N1N4|K2C78_HUMAN Keratin, type II cytoskeletal 78 OS=Homo sapiens OX=9606 GN=KRT78 PE=1 SV=2	3	7	4	4	11.5	7.5	7.5	56.964	521	521;521;520	0	10.683	3547000	3			+	65	2098;2305;2630;3519;4916;7755;8144	True;False;False;True;False;True;True	2146;2358;2690;3599;5022;7963;8369	2790;3064;3065;3498;4759;6661;10618;11163	2900;3191;3192;3638;4944;6922;11068;11638	2900;3191;3638;4944;6922;11068;11638
CON__Q86YZ3;Q86YZ3	CON__Q86YZ3;Q86YZ3	2;2	2;2	2;2	Hornerin	HRNR	;sp|Q86YZ3|HORN_HUMAN Hornerin OS=Homo sapiens OX=9606 GN=HRNR PE=1 SV=2	2	2	2	2	4.4	4.4	4.4	282.39	2850	2850;2850	0	2.3305	21476000	3			+	66	2973;3221	True;True	3043;3293	4008;4009;4332	4170;4171;4507	4170;4507
CON__Q8VED5	CON__Q8VED5	11	2	0				1	11	2	0	12.1	4	0	57.552	531	531	0	2.8413	11513000	2			+	67	2129;2130;2305;4392;5918;5919;5936;7754;9017;9018;9023	False;False;False;True;False;False;False;False;False;False;True	2179;2180;2358;4487;6052;6053;6070;7962;9255;9256;9261	2835;2836;2837;2838;3064;3065;5922;7969;7970;7971;7972;7973;7974;7975;7976;7977;7998;10616;10617;12292;12293;12294;12303	2952;2953;2954;2955;2956;3191;3192;6140;8269;8270;8271;8272;8273;8274;8275;8276;8277;8298;11066;11067;12797;12798;12799;12810	2954;2956;3191;6140;8270;8273;8298;11066;12797;12798;12810
CON__Q9D646	CON__Q9D646	5	1	1				1	5	1	1	19.4	2.8	2.8	44.56	392	392	0.0082305	0.55746	321000000	0			+	68	5117;5868;6052;6427;9227	False;False;False;True;False	5226;6001;6189;6572;9469	6903;7906;8155;8744;12552	7168;8203;8471;9102;13067	7168;8203;8471;9102;13067
CON__Q9H552	CON__Q9H552	18	2	2				1	18	2	2	23.8	4.6	4.6	55.151	499	499	0	5.2095	79833000	3			+	69	147;677;1365;2129;4090;4207;4917;5272;5918;6393;6428;6699;7537;7698;7754;8947;9017;9022	False;True;False;False;False;False;False;False;False;False;False;False;False;False;False;False;False;True	150;151;694;1398;1399;2179;4179;4298;5023;5385;6052;6538;6573;6858;7734;7735;7903;7904;7962;9183;9255;9260	192;193;194;195;196;197;894;895;1805;1806;1807;1808;1809;1810;2835;2836;2837;5489;5490;5649;6662;6663;6664;7120;7121;7122;7123;7124;7969;7970;7971;8695;8745;8746;9134;10292;10293;10294;10545;10546;10547;10548;10549;10616;10617;12188;12189;12292;12302	195;196;197;198;199;200;919;920;1865;1866;1867;1868;1869;1870;2952;2953;2954;2955;5695;5696;5856;6923;6924;6925;7393;7394;7395;7396;7397;7398;7399;7400;8269;8270;8271;9052;9103;9104;9504;10729;10730;10731;10994;10995;10996;10997;10998;11066;11067;12689;12690;12691;12797;12809	198;919;1867;2954;5695;5856;6923;7393;8270;9052;9104;9504;10730;10996;11066;12689;12797;12809	24;35;56		221;297;326
CON__Q9QWL7	CON__Q9QWL7	20	3	0				1	20	3	0	35.3	9.7	0	48.161	433	433	0	13.142	53536000	2			+	70	404;864;921;1575;1576;2041;2192;3002;3875;4352;4443;4569;5739;5740;5866;6722;7527;7690;7879;8425	True;False;True;False;False;False;False;True;False;False;False;False;False;False;False;False;False;False;False;False	417;885;944;1613;1614;2087;2242;3073;3963;4446;4539;4666;5866;5867;5868;5869;5999;6883;7724;7895;8093;8656	535;1153;1229;2080;2081;2720;2915;4043;5214;5872;5873;5874;5875;5876;5993;6156;7734;7735;7736;7737;7738;7739;7740;7902;9167;10281;10530;10531;10786;10787;11551;11552	548;1184;1264;2154;2155;2829;3038;4206;5412;6086;6087;6088;6089;6090;6091;6092;6212;6386;8026;8027;8028;8029;8030;8031;8032;8199;9537;10717;10977;10978;10979;10980;11244;11245;12044;12045;12046	548;1184;1264;2154;2155;2829;3038;4206;5412;6087;6212;6386;8028;8032;8199;9537;10717;10979;11245;12044	12;55		181;241
CON__Q9TTE1	CON__Q9TTE1	7	2	2				1	7	2	2	21.4	6.6	6.6	46.203	411	411	0	18.044	167680000	3			+	71	1358;3042;3506;6621;7146;7978;8147	False;True;False;False;True;False;False	1391;3113;3586;6773;7328;8198;8372	1798;4092;4743;9020;9774;9775;10932;11166	1858;4259;4928;9387;10181;10182;11396;11641	1858;4259;4928;9387;10182;11396;11641	0;1		237;238
Q13765;E9PAV3;Q9BZK3	Q13765;E9PAV3	3;3;1	3;3;1	3;3;1	Nascent polypeptide-associated complex subunit alpha;Nascent polypeptide-associated complex subunit alpha, muscle-specific form	NACA	sp|Q13765|NACA_HUMAN Nascent polypeptide-associated complex subunit alpha OS=Homo sapiens OX=9606 GN=NACA PE=1 SV=1;sp|E9PAV3|NACAM_HUMAN Nascent polypeptide-associated complex subunit alpha, muscle-specific form OS=Homo sapiens OX=9606 GN=NACA PE=1 SV=1	3	3	3	3	19.5	19.5	19.5	23.384	215	215;2078;213	0	32.204	33575000	3				72	5893;6016;7153	True;True;True	6027;6153;7335	7937;8110;9783	8237;8421;10191	8237;8421;10191
I6L899	I6L899	1	1	1	Golgin subfamily A member 8R	GOLGA8R	sp|I6L899|GOG8R_HUMAN Golgin subfamily A member 8R OS=Homo sapiens OX=9606 GN=GOLGA8R PE=3 SV=1	1	1	1	1	1.7	1.7	1.7	71.489	631	631	0	2.3759	0	0				73	1737	TRUE	1775	2314	2397	2397		4		469
O00139	O00139	3	3	3	Kinesin-like protein KIF2A	KIF2A	sp|O00139|KIF2A_HUMAN Kinesin-like protein KIF2A OS=Homo sapiens OX=9606 GN=KIF2A PE=1 SV=3	1	3	3	3	4.1	4.1	4.1	79.954	706	706	0	3.2687	19010000	3				74	2429;3479;6920	True;True;True	2486;3559;7092	3232;4716;9438	3367;4901;9825	3367;4901;9825
O00159	O00159	10	10	10	Unconventional myosin-Ic	MYO1C	sp|O00159|MYO1C_HUMAN Unconventional myosin-Ic OS=Homo sapiens OX=9606 GN=MYO1C PE=1 SV=4	1	10	10	10	12.5	12.5	12.5	121.68	1063	1063	0	23.42	156920000	10				75	1061;1273;2620;3263;5016;5732;6032;7720;7888;8489	True;True;True;True;True;True;True;True;True;True	1084;1304;2680;3337;5125;5859;6169;7926;8103;8720	1407;1688;3487;4396;6787;7726;8129;10574;10799;11634;11635	1452;1745;3627;4572;7049;8018;8440;11023;11257;12128;12129	1452;1745;3627;4572;7049;8018;8440;11023;11257;12128
O00178	O00178	3	3	3	GTP-binding protein 1	GTPBP1	sp|O00178|GTPB1_HUMAN GTP-binding protein 1 OS=Homo sapiens OX=9606 GN=GTPBP1 PE=1 SV=3	1	3	3	3	6.6	6.6	6.6	72.453	669	669	0	3.344	19484000	3				76	5452;5542;5600	True;True;True	5566;5657;5716	7348;7468;7543	7624;7751;7826	7624;7751;7826
O00180	O00180	1	1	1	Potassium channel subfamily K member 1	KCNK1	sp|O00180|KCNK1_HUMAN Potassium channel subfamily K member 1 OS=Homo sapiens OX=9606 GN=KCNK1 PE=1 SV=1	1	1	1	1	5.7	5.7	5.7	38.143	336	336	0	4.0819	3882900	1				77	2300	TRUE	2353	3058	3184	3184
O00214	O00214	2	2	2	Galectin-8	LGALS8	sp|O00214|LEG8_HUMAN Galectin-8 OS=Homo sapiens OX=9606 GN=LGALS8 PE=1 SV=4	1	2	2	2	6.3	6.3	6.3	35.808	317	317	0.0022438	0.94464	14347000	2				78	142;6870	True;True	145;7037	187;9353	190;9731	190;9731
O00231	O00231	2	2	2	26S proteasome non-ATPase regulatory subunit 11	PSMD11	sp|O00231|PSD11_HUMAN 26S proteasome non-ATPase regulatory subunit 11 OS=Homo sapiens OX=9606 GN=PSMD11 PE=1 SV=3	1	2	2	2	5.5	5.5	5.5	47.463	422	422	0.00078989	1.3776	7255300	1				79	6;1942	True;True	6;1984	6;2584	6;2690	6;2690
O00267	O00267	9	9	9	Transcription elongation factor SPT5	SUPT5H	sp|O00267|SPT5H_HUMAN Transcription elongation factor SPT5 OS=Homo sapiens OX=9606 GN=SUPT5H PE=1 SV=1	1	9	9	9	11.8	11.8	11.8	121	1087	1087	0	40.593	222560000	11				80	2138;2181;2259;2814;3182;4119;7040;8197;8842	True;True;True;True;True;True;True;True;True	2188;2231;2311;2881;3253;4209;7216;8423;9077	2849;2850;2901;3011;3783;4275;5528;9627;11230;11231;12058;12059	2968;2969;3024;3137;3938;4449;5735;10026;11708;11709;12558;12559	2969;3024;3137;3938;4449;5735;10026;11708;12559
O00303	O00303	9	9	9	Eukaryotic translation initiation factor 3 subunit F	EIF3F	sp|O00303|EIF3F_HUMAN Eukaryotic translation initiation factor 3 subunit F OS=Homo sapiens OX=9606 GN=EIF3F PE=1 SV=1	1	9	9	9	40.1	40.1	40.1	37.563	357	357	0	105.05	789560000	14				81	849;1491;2320;3356;3843;4761;7793;8346;8347	True;True;True;True;True;True;True;True;True	870;1528;2373;3434;3931;4863;8002;8575;8576	1135;1971;1972;3084;4539;4540;5174;5175;6419;6420;10670;11432;11433;11434	1166;2043;2044;2045;3211;4718;4719;5370;5371;6661;6662;11126;11918;11919;11920	1166;2045;3211;4719;5370;6662;11126;11918;11920
O00410	O00410	4	4	4	Importin-5	IPO5	sp|O00410|IPO5_HUMAN Importin-5 OS=Homo sapiens OX=9606 GN=IPO5 PE=1 SV=4	1	4	4	4	7.1	7.1	7.1	123.63	1097	1097	0	6.7616	17957000	3				82	3;705;5443;8326	True;True;True;True	3;722;5557;8555	3;928;7337;11404	3;953;7613;11890	3;953;7613;11890
O00425	O00425	9	8	8	Insulin-like growth factor 2 mRNA-binding protein 3	IGF2BP3	sp|O00425|IF2B3_HUMAN Insulin-like growth factor 2 mRNA-binding protein 3 OS=Homo sapiens OX=9606 GN=IGF2BP3 PE=1 SV=2	1	9	8	8	22.8	21.1	21.1	63.704	579	579	0	30.137	153350000	10				83	1289;1603;3523;3841;3951;5051;5509;8004;8121	True;False;True;True;True;True;True;True;True	1320;1641;3603;3929;4039;5160;5623;8226;8344	1707;2149;4764;5172;5310;6825;6826;7421;10974;11131;11132	1766;2228;4949;5368;5514;7087;7088;7703;11441;11605;11606	1766;2228;4949;5368;5514;7088;7703;11441;11605
O00442	O00442	4	4	4	RNA 3-terminal phosphate cyclase	RTCA	sp|O00442|RTCA_HUMAN RNA 3-terminal phosphate cyclase OS=Homo sapiens OX=9606 GN=RTCA PE=1 SV=1	1	4	4	4	21	21	21	39.336	366	366	0	4.4672	32573000	3				84	1156;2215;2751;7614	True;True;True;True	1180;2265;2818;7816	1529;2952;3691;10406	1575;3076;3844;10847	1575;3076;3844;10847
O00443	O00443	2	2	2	Phosphatidylinositol 4-phosphate 3-kinase C2 domain-containing subunit alpha	PIK3C2A	sp|O00443|P3C2A_HUMAN Phosphatidylinositol 4-phosphate 3-kinase C2 domain-containing subunit alpha OS=Homo sapiens OX=9606 GN=PIK3C2A PE=1 SV=2	1	2	2	2	1.7	1.7	1.7	190.68	1686	1686	0	2.6611	6236400	2				85	2358;6952	True;True	2413;7125	3138;9483	3266;9874	3266;9874
O00505	O00505	4	3	3	Importin subunit alpha-4	KPNA3	sp|O00505|IMA4_HUMAN Importin subunit alpha-4 OS=Homo sapiens OX=9606 GN=KPNA3 PE=1 SV=2	1	4	3	3	13.4	10.7	10.7	57.81	521	521	0	6.7569	14657000	3				86	625;1450;6125;6903	True;False;True;True	642;1487;6264;7073	817;1921;8274;9395	833;1992;8599;9774	833;1992;8599;9774
O00515	O00515	1	1	1	Ladinin-1	LAD1	sp|O00515|LAD1_HUMAN Ladinin-1 OS=Homo sapiens OX=9606 GN=LAD1 PE=1 SV=2	1	1	1	1	3.7	3.7	3.7	57.13	517	517	0.0056457	0.64182	0	0				87	1888	TRUE	1929	2512	2608	2608		5;6;90		472;473;480
O00541	O00541	2	2	2	Pescadillo homolog	PES1	sp|O00541|PESC_HUMAN Pescadillo homolog OS=Homo sapiens OX=9606 GN=PES1 PE=1 SV=1	1	2	2	2	4.4	4.4	4.4	68.002	588	588	0.00079808	1.4599	5368200	2				88	1474;3954	True;True	1511;4042	1949;5315	2021;5519	2021;5519
O00560	O00560	3	3	3	Syntenin-1	SDCBP	sp|O00560|SDCB1_HUMAN Syntenin-1 OS=Homo sapiens OX=9606 GN=SDCBP PE=1 SV=1	1	3	3	3	23.8	23.8	23.8	32.444	298	298	0	25.133	28105000	4				89	543;6233;8364	True;True;True	557;6375;8593	705;8423;11458	720;8756;11945;11946	720;8756;11946
O00566	O00566	3	3	3	U3 small nucleolar ribonucleoprotein protein MPP10	MPHOSPH10	sp|O00566|MPP10_HUMAN U3 small nucleolar ribonucleoprotein protein MPP10 OS=Homo sapiens OX=9606 GN=MPHOSPH10 PE=1 SV=2	1	3	3	3	9.3	9.3	9.3	78.863	681	681	0	3.9742	22498000	2				90	4261;6672;8844	True;True;True	4353;6828;9079	5727;9096;12061	5936;9464;12561	5936;9464;12561
O00571;Q9NQI0	O00571	36;2	36;2	11;0	ATP-dependent RNA helicase DDX3X	DDX3X	sp|O00571|DDX3X_HUMAN ATP-dependent RNA helicase DDX3X OS=Homo sapiens OX=9606 GN=DDX3X PE=1 SV=3	2	36	36	11	61.2	61.2	22.1	73.243	662	662;724	0	323.31	5022000000	55				91	1010;1128;1180;1190;1297;1326;1720;1771;1772;2422;2537;2582;2834;3160;3371;3384;4130;4274;5659;6307;6549;6787;6810;6868;6933;7166;7249;7432;8281;8289;8665;8854;8886;9109;9159;9243	True;True;True;True;True;True;True;True;True;True;True;True;True;True;True;True;True;True;True;True;True;True;True;True;True;True;True;True;True;True;True;True;True;True;True;True	1033;1151;1206;1216;1328;1358;1758;1810;1811;2479;2595;2642;2901;3231;3449;3450;3463;4220;4366;5781;5782;6451;6699;6949;6976;7034;7106;7349;7434;7624;8508;8517;8900;9089;9121;9348;9398;9485	1350;1485;1563;1575;1718;1759;2291;2365;2366;3222;3377;3378;3436;3437;3808;4245;4560;4561;4562;4591;5548;5549;5745;5746;7629;7630;8574;8575;8576;8922;9244;9281;9349;9457;9458;9459;9798;9905;10138;10139;10140;10141;11343;11344;11355;11844;11845;12074;12075;12115;12409;12467;12568	1394;1395;1530;1612;1613;1625;1777;1819;2373;2449;2450;3357;3515;3516;3574;3575;3963;4418;4740;4741;4742;4772;5755;5756;5954;5955;7915;7916;7917;8930;8931;8932;9288;9616;9653;9725;9726;9846;9847;9848;10207;10320;10565;10566;10567;10568;10569;11827;11828;11840;12342;12343;12574;12575;12615;12920;12978;13083	1395;1530;1613;1625;1777;1819;2373;2449;2450;3357;3515;3575;3963;4418;4740;4772;5755;5954;7916;8932;9288;9616;9653;9725;9848;10207;10320;10569;11827;11840;12343;12574;12615;12920;12978;13083	57;58		352;379
O00592	O00592	7	7	7	Podocalyxin	PODXL	sp|O00592|PODXL_HUMAN Podocalyxin OS=Homo sapiens OX=9606 GN=PODXL PE=1 SV=2	1	7	7	7	13.4	13.4	13.4	58.635	558	558	0	24.012	146290000	8				92	4333;4334;4442;4666;4818;4833;8843	True;True;True;True;True;True;True	4427;4428;4538;4767;4920;4935;9078	5841;5842;5843;5992;6304;6485;6502;12060	6054;6055;6056;6211;6539;6729;6748;12560	6054;6056;6211;6539;6729;6748;12560
O00629	O00629	5	5	4	Importin subunit alpha-3	KPNA4	sp|O00629|IMA3_HUMAN Importin subunit alpha-3 OS=Homo sapiens OX=9606 GN=KPNA4 PE=1 SV=1	1	5	5	4	20.3	20.3	17.7	57.886	521	521	0	26.952	120100000	6				93	952;1450;4962;6121;8649	True;True;True;True;True	975;1487;5069;6260;8883	1273;1274;1921;6720;8270;11824	1311;1312;1992;6982;8595;12321	1312;1992;6982;8595;12321
O00767	O00767	1	1	1	Acyl-CoA desaturase	SCD	sp|O00767|ACOD_HUMAN Acyl-CoA desaturase OS=Homo sapiens OX=9606 GN=SCD PE=1 SV=2	1	1	1	1	7	7	7	41.522	359	359	0	5.4251	13617000	1				94	6166	TRUE	6307	8333	8664	8664
O14579	O14579	4	4	4	Coatomer subunit epsilon	COPE	sp|O14579|COPE_HUMAN Coatomer subunit epsilon OS=Homo sapiens OX=9606 GN=COPE PE=1 SV=3	1	4	4	4	23.1	23.1	23.1	34.482	308	308	0	10.997	30539000	5				95	2245;5184;5593;5706	True;True;True;True	2297;5295;5708;5831	2994;6992;7532;7533;7693	3120;7262;7815;7816;7982	3120;7262;7816;7982
O14617	O14617	6	6	6	AP-3 complex subunit delta-1	AP3D1	sp|O14617|AP3D1_HUMAN AP-3 complex subunit delta-1 OS=Homo sapiens OX=9606 GN=AP3D1 PE=1 SV=1	1	6	6	6	7.7	7.7	7.7	130.16	1153	1153	0	13.873	65360000	7				96	395;1393;3462;4604;6145;8772	True;True;True;True;True;True	408;1428;3542;4703;6285;9006	524;1844;1845;4693;6208;8306;11971	537;1910;1911;4878;6441;8635;12469	537;1910;4878;6441;8635;12469
O14734	O14734	1	1	1	Acyl-coenzyme A thioesterase 8	ACOT8	sp|O14734|ACOT8_HUMAN Acyl-coenzyme A thioesterase 8 OS=Homo sapiens OX=9606 GN=ACOT8 PE=1 SV=1	1	1	1	1	5	5	5	35.914	319	319	0	1.7613	5856600	1				97	4605	TRUE	4704	6209	6442	6442
O14735	O14735	2	2	2	CDP-diacylglycerol--inositol 3-phosphatidyltransferase	CDIPT	sp|O14735|CDIPT_HUMAN CDP-diacylglycerol--inositol 3-phosphatidyltransferase OS=Homo sapiens OX=9606 GN=CDIPT PE=1 SV=1	1	2	2	2	11.3	11.3	11.3	23.539	213	213	0	3.0944	3745300	2				98	5637;7057	True;True	5759;7233	7603;9652	7889;10053	7889;10053
O14744	O14744	9	9	9	Protein arginine N-methyltransferase 5;Protein arginine N-methyltransferase 5, N-terminally processed	PRMT5	sp|O14744|ANM5_HUMAN Protein arginine N-methyltransferase 5 OS=Homo sapiens OX=9606 GN=PRMT5 PE=1 SV=4	1	9	9	9	17.3	17.3	17.3	72.683	637	637	0	24.093	170690000	11				99	44;973;1409;1740;2953;6330;8514;8602;8603	True;True;True;True;True;True;True;True;True	45;996;1444;1778;3023;6475;8745;8836;8837	62;1299;1300;1863;2317;3985;8606;8607;11662;11766;11767;11768	63;1338;1339;1929;2400;4147;8963;8964;12156;12263;12264;12265	63;1338;1929;2400;4147;8964;12156;12263;12265
O14773	O14773	1	1	1	Tripeptidyl-peptidase 1	TPP1	sp|O14773|TPP1_HUMAN Tripeptidyl-peptidase 1 OS=Homo sapiens OX=9606 GN=TPP1 PE=1 SV=2	1	1	1	1	4.8	4.8	4.8	61.247	563	563	0	2.8468	4012700	1				100	8590	TRUE	8824	11753	12249	12249
O14776	O14776	10	10	10	Transcription elongation regulator 1	TCERG1	sp|O14776|TCRG1_HUMAN Transcription elongation regulator 1 OS=Homo sapiens OX=9606 GN=TCERG1 PE=1 SV=2	1	10	10	10	12.8	12.8	12.8	123.9	1098	1098	0	34.674	202560000	10				101	382;455;977;1478;4622;5251;6405;6789;7717;8229	True;True;True;True;True;True;True;True;True;True	395;468;1000;1515;4721;5363;6550;6951;7923;8456	506;598;1304;1955;6228;7095;8714;9246;9247;10571;11277	517;611;1343;2027;6462;7367;9071;9618;9619;11020;11758	517;611;1343;2027;6462;7367;9071;9619;11020;11758
O14802	O14802	4	4	4	DNA-directed RNA polymerase III subunit RPC1	POLR3A	sp|O14802|RPC1_HUMAN DNA-directed RNA polymerase III subunit RPC1 OS=Homo sapiens OX=9606 GN=POLR3A PE=1 SV=2	1	4	4	4	5.3	5.3	5.3	155.64	1390	1390	0.007623	0.59263	17931000	4				102	5050;5155;8398;8796	True;True;True;True	5159;5265;8628;9030	6824;6953;11510;12002	7086;7222;12001;12500	7086;7222;12001;12500
O14880	O14880	1	1	1	Microsomal glutathione S-transferase 3	MGST3	sp|O14880|MGST3_HUMAN Microsomal glutathione S-transferase 3 OS=Homo sapiens OX=9606 GN=MGST3 PE=1 SV=1	1	1	1	1	8.6	8.6	8.6	16.516	152	152	0	2.7955	7298700	1				103	3446	TRUE	3526	4677	4862	4862
O14925;Q5SRD1	O14925;Q5SRD1	3;3	3;3	3;3	Mitochondrial import inner membrane translocase subunit Tim23;Putative mitochondrial import inner membrane translocase subunit Tim23B	TIMM23;TIMM23B	sp|O14925|TIM23_HUMAN Mitochondrial import inner membrane translocase subunit Tim23 OS=Homo sapiens OX=9606 GN=TIMM23 PE=1 SV=1;sp|Q5SRD1|TI23B_HUMAN Putative mitochondrial import inner membrane translocase subunit Tim23B OS=Homo sapiens OX=9606 GN=TIMM23B	2	3	3	3	37.3	37.3	37.3	21.943	209	209;257	0	13.993	24880000	3				104	2540;7933;9160	True;True;True	2598;8151;9399	3381;10859;12468	3519;11317;12979	3519;11317;12979
P19105;O14950;P24844	P19105;O14950;P24844	4;4;2	4;4;2	4;4;2	Myosin regulatory light chain 12A;Myosin regulatory light chain 12B;Myosin regulatory light polypeptide 9	MYL12A;MYL12B;MYL9	sp|P19105|ML12A_HUMAN Myosin regulatory light chain 12A OS=Homo sapiens OX=9606 GN=MYL12A PE=1 SV=2;sp|O14950|ML12B_HUMAN Myosin regulatory light chain 12B OS=Homo sapiens OX=9606 GN=MYL12B PE=1 SV=2;sp|P24844|MYL9_HUMAN Myosin regulatory light polypeptide	3	4	4	4	39.2	39.2	39.2	19.794	171	171;172;172	0	23.026	268110000	7				105	738;1032;2455;5775	True;True;True;True	756;1055;2512;5908	978;979;1373;1374;3265;7785;7786	1004;1005;1418;1419;3402;8078;8079	1004;1418;3402;8079
O14974	O14974	7	7	7	Protein phosphatase 1 regulatory subunit 12A	PPP1R12A	sp|O14974|MYPT1_HUMAN Protein phosphatase 1 regulatory subunit 12A OS=Homo sapiens OX=9606 GN=PPP1R12A PE=1 SV=1	1	7	7	7	12	12	12	115.28	1030	1030	0	32.986	86377000	7				106	618;2151;3767;4966;6900;7323;8285	True;True;True;True;True;True;True	634;2201;3852;5073;7070;7514;8513	808;2863;5076;6725;9392;10007;11350;11351	823;2982;5269;6987;9771;10430;11834;11835	823;2982;5269;6987;9771;10430;11835
O14976	O14976	2	2	2	Cyclin-G-associated kinase	GAK	sp|O14976|GAK_HUMAN Cyclin-G-associated kinase OS=Homo sapiens OX=9606 GN=GAK PE=1 SV=2	1	2	2	2	2.9	2.9	2.9	143.19	1311	1311	0	4.8459	8396500	2				107	3451;7071	True;True	3531;7247	4682;9670	4867;10071	4867;10071
O14979	O14979	8	8	7	Heterogeneous nuclear ribonucleoprotein D-like	HNRNPDL	sp|O14979|HNRDL_HUMAN Heterogeneous nuclear ribonucleoprotein D-like OS=Homo sapiens OX=9606 GN=HNRNPDL PE=1 SV=3	1	8	8	7	19	19	17.1	46.437	420	420	0	37.194	472500000	11				108	1212;2091;2653;2667;5596;6605;8254;8255	True;True;True;True;True;True;True;True	1239;2138;2713;2728;5711;6756;8481;8482	1605;2780;2781;3527;3546;7536;7537;8993;8994;8995;11309;11310	1656;2890;2891;3667;3688;7819;7820;9360;9361;9362;11792;11793	1656;2890;3667;3688;7819;9360;11792;11793
O14980	O14980	5	5	5	Exportin-1	XPO1	sp|O14980|XPO1_HUMAN Exportin-1 OS=Homo sapiens OX=9606 GN=XPO1 PE=1 SV=1	1	5	5	5	6.2	6.2	6.2	123.38	1071	1071	0	6.5085	60206000	3				109	2015;2339;4759;5023;9269	True;True;True;True;True	2059;2392;4861;5132;9511	2681;3110;6417;6795;12646	2787;3237;6659;7057;13170	2787;3237;6659;7057;13170
O14981	O14981	2	2	2	TATA-binding protein-associated factor 172	BTAF1	sp|O14981|BTAF1_HUMAN TATA-binding protein-associated factor 172 OS=Homo sapiens OX=9606 GN=BTAF1 PE=1 SV=2	1	2	2	2	2.7	2.7	2.7	206.89	1849	1849	0.00079491	1.4477	10339000	2				110	609;749	True;True	625;767	796;997;998	811;1024;1025	811;1024
O15027	O15027	13	13	13	Protein transport protein Sec16A	SEC16A	sp|O15027|SC16A_HUMAN Protein transport protein Sec16A OS=Homo sapiens OX=9606 GN=SEC16A PE=1 SV=4	1	13	13	13	13.1	13.1	13.1	251.89	2357	2357	0	44.24	197990000	14				111	137;287;3206;4377;5000;5445;6840;6961;7157;7273;7714;8007;9214	True;True;True;True;True;True;True;True;True;True;True;True;True	140;297;3278;4472;5109;5559;7006;7134;7340;7460;7920;8229;9456	182;377;4311;5905;5906;6768;7339;7340;9316;9494;9789;9939;10568;10978;12537	185;387;4485;6122;6123;7030;7615;7616;9689;9885;10197;10356;11017;11445;13052	185;387;4485;6122;7030;7615;9689;9885;10197;10356;11017;11445;13052
O15031	O15031	3	3	3	Plexin-B2	PLXNB2	sp|O15031|PLXB2_HUMAN Plexin-B2 OS=Homo sapiens OX=9606 GN=PLXNB2 PE=1 SV=3	1	3	3	3	2.2	2.2	2.2	205.12	1838	1838	0	1.785	9015200	2				112	1332;1744;5201	True;True;True	1364;1782;5312	1766;2322;7014	1826;2405;7284	1826;2405;7284
O15042	O15042	6	6	6	U2 snRNP-associated SURP motif-containing protein	U2SURP	sp|O15042|SR140_HUMAN U2 snRNP-associated SURP motif-containing protein OS=Homo sapiens OX=9606 GN=U2SURP PE=1 SV=2	1	6	6	6	9.8	9.8	9.8	118.29	1029	1029	0	20.857	109510000	8				113	9;2311;4476;5638;6030;7244	True;True;True;True;True;True	9;2364;4572;5760;6167;7429	9;3073;3074;6029;7604;8126;9897;9898	9;3200;3201;6252;7890;8437;10312;10313	9;3200;6252;7890;8437;10312
O15067	O15067	4	4	4	Phosphoribosylformylglycinamidine synthase	PFAS	sp|O15067|PUR4_HUMAN Phosphoribosylformylglycinamidine synthase OS=Homo sapiens OX=9606 GN=PFAS PE=1 SV=4	1	4	4	4	5.8	5.8	5.8	144.73	1338	1338	0	15.927	45429000	4				114	508;4685;5093;5278	True;True;True;True	521;4786;5202;5391	659;6332;6876;7131	672;6569;7141;7407	672;6569;7141;7407
O15144	O15144	1	1	1	Actin-related protein 2/3 complex subunit 2	ARPC2	sp|O15144|ARPC2_HUMAN Actin-related protein 2/3 complex subunit 2 OS=Homo sapiens OX=9606 GN=ARPC2 PE=1 SV=1	1	1	1	1	9.3	9.3	9.3	34.333	300	300	0.002214	0.8898	4159200	1				115	8870	TRUE	9105	12095	12595	12595
O15145	O15145	1	1	1	Actin-related protein 2/3 complex subunit 3	ARPC3	sp|O15145|ARPC3_HUMAN Actin-related protein 2/3 complex subunit 3 OS=Homo sapiens OX=9606 GN=ARPC3 PE=1 SV=3	1	1	1	1	6.2	6.2	6.2	20.546	178	178	0.0022272	0.91444	3727200	1				116	4793	TRUE	4895	6458	6702	6702
O15160	O15160	1	1	1	DNA-directed RNA polymerases I and III subunit RPAC1	POLR1C	sp|O15160|RPAC1_HUMAN DNA-directed RNA polymerases I and III subunit RPAC1 OS=Homo sapiens OX=9606 GN=POLR1C PE=1 SV=1	1	1	1	1	6.1	6.1	6.1	39.249	346	346	0	7.2444	5904200	1				117	4993	TRUE	5102	6760	7022	7022
O15258	O15258	2	2	2	Protein RER1	RER1	sp|O15258|RER1_HUMAN Protein RER1 OS=Homo sapiens OX=9606 GN=RER1 PE=1 SV=1	1	2	2	2	15.3	15.3	15.3	22.958	196	196	0	5.296	38187000	1				118	4718;6824	True;True	4819;6990	6367;9297	6606;9670	6606;9670
O15260	O15260	2	2	2	Surfeit locus protein 4	SURF4	sp|O15260|SURF4_HUMAN Surfeit locus protein 4 OS=Homo sapiens OX=9606 GN=SURF4 PE=1 SV=3	1	2	2	2	11.5	11.5	11.5	30.394	269	269	0	5.063	41490000	2				119	2991;4470	True;True	3061;4566	4029;6023	4192;6246	4192;6246
O15269	O15269	1	1	1	Serine palmitoyltransferase 1	SPTLC1	sp|O15269|SPTC1_HUMAN Serine palmitoyltransferase 1 OS=Homo sapiens OX=9606 GN=SPTLC1 PE=1 SV=1	1	1	1	1	4.4	4.4	4.4	52.743	473	473	0	4.4075	18449000	1				120	8805	TRUE	9039	12014	12512	12512
O15371	O15371	16	16	16	Eukaryotic translation initiation factor 3 subunit D	EIF3D	sp|O15371|EIF3D_HUMAN Eukaryotic translation initiation factor 3 subunit D OS=Homo sapiens OX=9606 GN=EIF3D PE=1 SV=1	1	16	16	16	44.3	44.3	44.3	63.972	548	548	0	170.97	813210000	19				121	909;1250;1588;2351;2572;3552;4664;5922;5996;6809;7400;7859;8063;8953;9133;9171	True;True;True;True;True;True;True;True;True;True;True;True;True;True;True;True	932;1280;1626;2405;2632;3632;4765;6056;6132;6975;7592;8070;8286;9189;9372;9411	1215;1656;2129;3128;3129;3426;4798;4799;6302;7981;7982;8087;9280;10100;10756;10757;11060;12196;12439;12482	1248;1712;2207;3256;3257;3564;4983;4984;6537;8281;8282;8397;9652;10525;11214;11215;11532;12698;12699;12950;12993	1248;1712;2207;3257;3564;4984;6537;8282;8397;9652;10525;11214;11532;12698;12950;12993
O15372	O15372	12	12	12	Eukaryotic translation initiation factor 3 subunit H	EIF3H	sp|O15372|EIF3H_HUMAN Eukaryotic translation initiation factor 3 subunit H OS=Homo sapiens OX=9606 GN=EIF3H PE=1 SV=1	1	12	12	12	52.3	52.3	52.3	39.93	352	352	0	88.798	532010000	16				122	533;3403;4281;4555;4613;4620;5558;5965;6071;6534;6768;7461	True;True;True;True;True;True;True;True;True;True;True;True	547;3483;4373;4652;4712;4719;5673;6100;6209;6683;6930;7654	694;4620;5757;6141;6218;6226;7489;8039;8040;8198;8199;8902;9219;9220;9221;10181	709;4801;5966;6371;6452;6460;7772;8344;8345;8520;8521;9268;9590;9591;9592;10609	709;4801;5966;6371;6452;6460;7772;8344;8521;9268;9591;10609
O15427	O15427	5	5	5	Monocarboxylate transporter 4	SLC16A3	sp|O15427|MOT4_HUMAN Monocarboxylate transporter 4 OS=Homo sapiens OX=9606 GN=SLC16A3 PE=1 SV=1	1	5	5	5	15.9	15.9	15.9	49.469	465	465	0	8.8159	87781000	5				123	2709;4753;4893;6159;6683	True;True;True;True;True	2770;4855;4998;6299;6840	3600;6410;6411;6609;8324;9111	3744;6652;6653;6866;8654;9479	3744;6652;6866;8654;9479
O15439	O15439	1	1	1	Multidrug resistance-associated protein 4	ABCC4	sp|O15439|MRP4_HUMAN Multidrug resistance-associated protein 4 OS=Homo sapiens OX=9606 GN=ABCC4 PE=1 SV=3	1	1	1	1	2.3	2.3	2.3	149.52	1325	1325	0.0022043	0.85734	3534600	1				124	661	TRUE	678	863	884	884
O15523	O15523	27	2	2	ATP-dependent RNA helicase DDX3Y	DDX3Y	sp|O15523|DDX3Y_HUMAN ATP-dependent RNA helicase DDX3Y OS=Homo sapiens OX=9606 GN=DDX3Y PE=1 SV=2	1	27	2	2	44.8	5.6	5.6	73.153	660	660	0	8.5254	21035000	3				125	1010;1128;1180;1190;1297;1720;1771;1772;2422;2537;2582;3160;3371;3384;4130;4274;5659;6307;6549;7166;7366;7433;8289;8665;9109;9159;9243	False;False;False;False;False;False;False;False;False;False;False;False;False;False;False;False;False;False;False;False;True;True;False;False;False;False;False	1033;1151;1206;1216;1328;1758;1810;1811;2479;2595;2642;3231;3449;3450;3463;4220;4366;5781;5782;6451;6699;7349;7558;7625;8517;8900;9348;9398;9485	1350;1485;1563;1575;1718;2291;2365;2366;3222;3377;3378;3436;3437;4245;4560;4561;4562;4591;5548;5549;5745;5746;7629;7630;8574;8575;8576;8922;9798;10060;10142;10143;11355;11844;11845;12409;12467;12568	1394;1395;1530;1612;1613;1625;1777;2373;2449;2450;3357;3515;3516;3574;3575;4418;4740;4741;4742;4772;5755;5756;5954;5955;7915;7916;7917;8930;8931;8932;9288;10207;10484;10570;10571;11840;12342;12343;12920;12978;13083	1395;1530;1613;1625;1777;2373;2449;2450;3357;3515;3575;4418;4740;4772;5755;5954;7916;8932;9288;10207;10484;10571;11840;12343;12920;12978;13083	57;58		350;377
O43143	O43143	17	17	17	Pre-mRNA-splicing factor ATP-dependent RNA helicase DHX15	DHX15	sp|O43143|DHX15_HUMAN Pre-mRNA-splicing factor ATP-dependent RNA helicase DHX15 OS=Homo sapiens OX=9606 GN=DHX15 PE=1 SV=2	1	17	17	17	30.2	30.2	30.2	90.932	795	795	0	44.275	551320000	22				126	506;1249;1445;2045;2116;3328;3661;3887;4690;5209;7129;7482;7546;7640;7950;8212;9075	True;True;True;True;True;True;True;True;True;True;True;True;True;True;True;True;True	519;1279;1482;2091;2165;3405;3741;3975;4791;5321;7308;7675;7746;7845;8169;8438;9314	656;657;1655;1916;2725;2815;4497;4498;4935;5228;5229;6339;7043;9741;10210;10315;10467;10886;11249;12371;12372	669;670;1711;1987;2834;2927;2928;4676;4677;5126;5426;5427;6577;7315;10144;10641;10753;10911;11344;11727;12881;12882	669;1711;1987;2834;2928;4676;5126;5426;6577;7315;10144;10641;10753;10911;11344;11727;12882
O43148	O43148	7	7	7	mRNA cap guanine-N7 methyltransferase	RNMT	sp|O43148|MCES_HUMAN mRNA cap guanine-N7 methyltransferase OS=Homo sapiens OX=9606 GN=RNMT PE=1 SV=1	1	7	7	7	24.6	24.6	24.6	54.843	476	476	0	33.323	308820000	7				127	1118;4190;5310;5702;5941;6636;7382	True;True;True;True;True;True;True	1141;4281;5423;5827;6076;6788;7574	1472;5629;7172;7689;8005;9040;10080	1517;5836;7448;7978;8305;9407;10504	1517;5836;7448;7978;8305;9407;10504
O43159	O43159	1	1	1	Ribosomal RNA-processing protein 8	RRP8	sp|O43159|RRP8_HUMAN Ribosomal RNA-processing protein 8 OS=Homo sapiens OX=9606 GN=RRP8 PE=1 SV=2	1	1	1	1	3.1	3.1	3.1	50.714	456	456	0	1.5876	2501100	1				128	4631	TRUE	4731	6244	6478	6478
O43169	O43169	2	2	2	Cytochrome b5 type B	CYB5B	sp|O43169|CYB5B_HUMAN Cytochrome b5 type B OS=Homo sapiens OX=9606 GN=CYB5B PE=1 SV=3	1	2	2	2	30.7	30.7	30.7	16.694	150	150	0	6.3576	18417000	2				129	2324;2976	True;True	2377;3046	3089;4012	3216;4174	3216;4174
O43175	O43175	3	3	3	D-3-phosphoglycerate dehydrogenase	PHGDH	sp|O43175|SERA_HUMAN D-3-phosphoglycerate dehydrogenase OS=Homo sapiens OX=9606 GN=PHGDH PE=1 SV=4	1	3	3	3	7.9	7.9	7.9	56.65	533	533	0	11.246	22832000	3				130	293;5777;8716	True;True;True	303;5910;8951	383;7788;11908	393;8081;12406	393;8081;12406
O43242	O43242	3	3	3	26S proteasome non-ATPase regulatory subunit 3	PSMD3	sp|O43242|PSMD3_HUMAN 26S proteasome non-ATPase regulatory subunit 3 OS=Homo sapiens OX=9606 GN=PSMD3 PE=1 SV=2	1	3	3	3	14.4	14.4	14.4	60.977	534	534	0	3.1747	20041000	3				131	381;1014;5199	True;True;True	394;1037;5310	505;1354;7012	516;1399;7282	516;1399;7282
O43251;Q9NWB1	O43251;Q9NWB1	2;1	2;1	2;1	RNA binding protein fox-1 homolog 2;RNA binding protein fox-1 homolog 1	RBFOX2;RBFOX1	sp|O43251|RFOX2_HUMAN RNA binding protein fox-1 homolog 2 OS=Homo sapiens OX=9606 GN=RBFOX2 PE=1 SV=3;sp|Q9NWB1|RFOX1_HUMAN RNA binding protein fox-1 homolog 1 OS=Homo sapiens OX=9606 GN=RBFOX1 PE=1 SV=2	2	2	2	2	10.5	10.5	10.5	41.373	390	390;397	0	6.3374	17996000	2				132	2672;8988	True;True	2733;9225	3552;12254	3694;12758	3694;12758
O43290	O43290	3	3	3	U4/U6.U5 tri-snRNP-associated protein 1	SART1	sp|O43290|SNUT1_HUMAN U4/U6.U5 tri-snRNP-associated protein 1 OS=Homo sapiens OX=9606 GN=SART1 PE=1 SV=1	1	3	3	3	6	6	6	90.254	800	800	0	4.1107	10777000	3				133	1446;7085;7917	True;True;True	1483;7261;8134	1917;9685;10838	1988;10087;11296	1988;10087;11296
O43324	O43324	1	1	1	Eukaryotic translation elongation factor 1 epsilon-1	EEF1E1	sp|O43324|MCA3_HUMAN Eukaryotic translation elongation factor 1 epsilon-1 OS=Homo sapiens OX=9606 GN=EEF1E1 PE=1 SV=1	1	1	1	1	6.3	6.3	6.3	19.81	174	174	0	1.7468	2783000	1				134	4	TRUE	4	4	4	4
O43390	O43390	16	11	11	Heterogeneous nuclear ribonucleoprotein R	HNRNPR	sp|O43390|HNRPR_HUMAN Heterogeneous nuclear ribonucleoprotein R OS=Homo sapiens OX=9606 GN=HNRNPR PE=1 SV=1	1	16	11	11	30.8	23.2	23.2	70.942	633	633	0	108.72	922080000	14				135	284;1222;1622;1699;1882;2654;3262;4345;4653;4840;5072;6748;7310;7631;8732;9056	False;True;True;True;True;False;True;True;False;True;True;False;True;False;True;True	294;1250;1660;1737;1923;2714;3336;4439;4754;4942;5181;6910;7501;7836;8967;9295	374;1619;2171;2266;2504;3528;3529;4392;4393;4394;4395;5860;6287;6288;6512;6513;6852;9198;9991;10448;11926;12348;12349	384;1671;2250;2251;2348;2600;3668;3669;4568;4569;4570;4571;6073;6074;6522;6523;6758;6759;7114;9569;10411;10890;12424;12857;12858	384;1671;2250;2348;2600;3668;4569;6074;6522;6759;7114;9569;10411;10890;12424;12858
O43491	O43491	10	10	10	Band 4.1-like protein 2	EPB41L2	sp|O43491|E41L2_HUMAN Band 4.1-like protein 2 OS=Homo sapiens OX=9606 GN=EPB41L2 PE=1 SV=1	1	10	10	10	20.4	20.4	20.4	112.59	1005	1005	0	22.575	152960000	10				136	1424;1560;2037;3341;3967;3994;5963;8663;8733;8753	True;True;True;True;True;True;True;True;True;True	1460;1597;2082;3418;4055;4082;6098;8898;8968;8987	1884;2062;2712;4514;5331;5365;8036;11841;11842;11927;11950	1951;2136;2820;4693;5535;5569;8341;12338;12339;12425;12448	1951;2136;2820;4693;5535;5569;8341;12338;12425;12448
O43572	O43572	1	1	1	A-kinase anchor protein 10, mitochondrial	AKAP10	sp|O43572|AKA10_HUMAN A-kinase anchor protein 10, mitochondrial OS=Homo sapiens OX=9606 GN=AKAP10 PE=1 SV=2	1	1	1	1	3.3	3.3	3.3	73.817	662	662	0.0076125	0.58416	3704900	1				137	294	TRUE	304	384	394	394
O43592	O43592	2	2	2	Exportin-T	XPOT	sp|O43592|XPOT_HUMAN Exportin-T OS=Homo sapiens OX=9606 GN=XPOT PE=1 SV=2	1	2	2	2	2.8	2.8	2.8	109.96	962	962	0	1.7681	4904500	1				138	544;1199	True;True	558;1225	706;1586	721;1636	721;1636
O43660	O43660	3	3	3	Pleiotropic regulator 1	PLRG1	sp|O43660|PLRG1_HUMAN Pleiotropic regulator 1 OS=Homo sapiens OX=9606 GN=PLRG1 PE=1 SV=1	1	3	3	3	10.9	10.9	10.9	57.193	514	514	0	2.7319	21727000	3				139	897;5304;8300	True;True;True	920;5417;8529	1196;7165;11368	1229;7441;11853	1229;7441;11853
O43663	O43663	2	2	2	Protein regulator of cytokinesis 1	PRC1	sp|O43663|PRC1_HUMAN Protein regulator of cytokinesis 1 OS=Homo sapiens OX=9606 GN=PRC1 PE=1 SV=2	1	2	2	2	3.2	3.2	3.2	71.606	620	620	0.0015373	1.1589	7900700	1				140	1733;4614	True;True	1771;4713	2309;6219	2392;6453	2392;6453
O43684	O43684	4	4	4	Mitotic checkpoint protein BUB3	BUB3	sp|O43684|BUB3_HUMAN Mitotic checkpoint protein BUB3 OS=Homo sapiens OX=9606 GN=BUB3 PE=1 SV=1	1	4	4	4	24.7	24.7	24.7	37.154	328	328	0	20.955	108030000	7				141	2438;5629;8114;9201	True;True;True;True	2495;5750;8337;9443	3244;7589;7590;11124;12521;12522	3380;7875;7876;11598;13035;13036;13037	3380;7875;11598;13037
O43707;P12814;P35609;Q08043	O43707	5;2;1;1	5;2;1;1	5;2;1;1	Alpha-actinin-4	ACTN4	sp|O43707|ACTN4_HUMAN Alpha-actinin-4 OS=Homo sapiens OX=9606 GN=ACTN4 PE=1 SV=2	4	5	5	5	10.3	10.3	10.3	104.85	911	911;892;894;901	0	13.23	48672000	5				142	2118;4429;6976;8204;8421	True;True;True;True;True	2167;4525;7150;8430;8652	2817;5973;9514;11239;11546	2930;6192;9906;11717;12039	2930;6192;9906;11717;12039
O43709	O43709	1	1	1	Probable 18S rRNA (guanine-N(7))-methyltransferase	WBSCR22	sp|O43709|BUD23_HUMAN Probable 18S rRNA (guanine-N(7))-methyltransferase OS=Homo sapiens OX=9606 GN=BUD23 PE=1 SV=2	1	1	1	1	6.4	6.4	6.4	31.88	281	281	0	2.6381	13628000	1				143	6670	TRUE	6826	9094	9462	9462
O43776	O43776	6	6	6	Asparagine--tRNA ligase, cytoplasmic	NARS	sp|O43776|SYNC_HUMAN Asparagine--tRNA ligase, cytoplasmic OS=Homo sapiens OX=9606 GN=NARS PE=1 SV=1	1	6	6	6	15.1	15.1	15.1	62.942	548	548	0	20.148	80212000	7				144	2336;3551;5078;5361;7151;8407	True;True;True;True;True;True	2389;3631;5187;5474;7333;8638	3103;4797;6858;7233;9780;11529	3230;4982;7121;7509;10187;10188;12022	3230;4982;7121;7509;10188;12022
O43795	O43795	15	15	15	Unconventional myosin-Ib	MYO1B	sp|O43795|MYO1B_HUMAN Unconventional myosin-Ib OS=Homo sapiens OX=9606 GN=MYO1B PE=1 SV=3	1	15	15	15	17.1	17.1	17.1	131.98	1136	1136	0	31.675	194310000	12				145	37;511;2323;3554;3646;4533;4639;5836;5850;6849;7091;7242;8185;8526;8527	True;True;True;True;True;True;True;True;True;True;True;True;True;True;True	38;524;2376;3634;3726;4630;4739;5969;5983;7015;7269;7427;8410;8758;8759	44;663;3088;4801;4916;6107;6253;7861;7878;9328;9694;9895;11215;11677;11678	45;677;3215;4986;5106;6333;6487;8154;8173;9703;10096;10310;11693;12172;12173	45;677;3215;4986;5106;6333;6487;8154;8173;9703;10096;10310;11693;12172;12173
O43809	O43809	14	14	14	Cleavage and polyadenylation specificity factor subunit 5	NUDT21	sp|O43809|CPSF5_HUMAN Cleavage and polyadenylation specificity factor subunit 5 OS=Homo sapiens OX=9606 GN=NUDT21 PE=1 SV=1	1	14	14	14	63.9	63.9	63.9	26.227	227	227	0	45.613	1039100000	18				146	422;4203;4618;5134;5135;5137;5416;6216;6217;6714;7223;7669;7975;9111	True;True;True;True;True;True;True;True;True;True;True;True;True;True	435;4294;4717;5244;5245;5247;5530;6358;6359;6874;7407;7874;8195;9350	560;5644;6224;6923;6924;6925;6927;6928;7303;8397;8398;8399;8400;9156;9868;10504;10505;10929;12411;12412	573;5851;6458;7188;7189;7190;7192;7193;7579;8729;8730;8731;8732;9526;10280;10950;10951;10952;11393;12922;12923	573;5851;6458;7188;7189;7192;7579;8729;8731;9526;10280;10952;11393;12922
O43823	O43823	1	1	1	A-kinase anchor protein 8	AKAP8	sp|O43823|AKAP8_HUMAN A-kinase anchor protein 8 OS=Homo sapiens OX=9606 GN=AKAP8 PE=1 SV=1	1	1	1	1	2.9	2.9	2.9	76.107	692	692	0	3.885	6059000	1				147	8097	TRUE	8320	11103	11576	11576
O43837	O43837	2	2	2	Isocitrate dehydrogenase [NAD] subunit beta, mitochondrial	IDH3B	sp|O43837|IDH3B_HUMAN Isocitrate dehydrogenase [NAD] subunit beta, mitochondrial OS=Homo sapiens OX=9606 GN=IDH3B PE=1 SV=2	1	2	2	2	11.2	11.2	11.2	42.183	385	385	0	3.9306	11234000	2				148	4665;8189	True;True	4766;8414	6303;11219	6538;11697	6538;11697
O43852	O43852	4	4	4	Calumenin	CALU	sp|O43852|CALU_HUMAN Calumenin OS=Homo sapiens OX=9606 GN=CALU PE=1 SV=2	1	4	4	4	25.7	25.7	25.7	37.106	315	315	0	18.527	98391000	5				149	1567;1573;3475;8317	True;True;True;True	1605;1611;3555;8546	2071;2078;4711;11393;11394	2145;2152;4896;11879;11880	2145;2152;4896;11879
O60231	O60231	4	4	4	Putative pre-mRNA-splicing factor ATP-dependent RNA helicase DHX16	DHX16	sp|O60231|DHX16_HUMAN Pre-mRNA-splicing factor ATP-dependent RNA helicase DHX16 OS=Homo sapiens OX=9606 GN=DHX16 PE=1 SV=2	1	4	4	4	6.1	6.1	6.1	119.26	1041	1041	0	12.564	26390000	5				150	1618;1822;7730;7900	True;True;True;True	1656;1861;7936;8115	2166;2423;10584;10585;10815	2245;2510;11033;11034;11273	2245;2510;11034;11273
O60244	O60244	7	7	7	Mediator of RNA polymerase II transcription subunit 14	MED14	sp|O60244|MED14_HUMAN Mediator of RNA polymerase II transcription subunit 14 OS=Homo sapiens OX=9606 GN=MED14 PE=1 SV=2	1	7	7	7	10	10	10	160.6	1454	1454	0	7.9698	38114000	7				151	3389;3664;4562;4947;7814;7844;7923	True;True;True;True;True;True;True	3468;3745;4659;5054;8024;8054;8140	4598;4942;6148;6701;10698;10733;10846	4779;5133;6378;6962;11155;11191;11304	4779;5133;6378;6962;11155;11191;11304
O60291	O60291	1	1	1	E3 ubiquitin-protein ligase MGRN1	MGRN1	sp|O60291|MGRN1_HUMAN E3 ubiquitin-protein ligase MGRN1 OS=Homo sapiens OX=9606 GN=MGRN1 PE=1 SV=2	1	1	1	1	4.2	4.2	4.2	60.752	552	552	0.002907	0.80245	0	0				152	3024	TRUE	3095	4071	4236	4236		7		3
O60306	O60306	9	9	9	Intron-binding protein aquarius	AQR	sp|O60306|AQR_HUMAN RNA helicase aquarius OS=Homo sapiens OX=9606 GN=AQR PE=1 SV=4	1	9	9	9	10.7	10.7	10.7	171.29	1485	1485	0	43.699	125090000	9				153	2393;3041;3680;6204;6577;6619;7733;8296;8700	True;True;True;True;True;True;True;True;True	2449;3112;3762;6345;6727;6771;7940;8524;8935	3187;4091;4966;8380;8956;9018;10589;10590;11363;11890;11891	3320;4258;5157;8712;9322;9385;11038;11039;11848;12388;12389	3320;4258;5157;8712;9322;9385;11038;11848;12389
O60341	O60341	1	1	1	Lysine-specific histone demethylase 1A	KDM1A	sp|O60341|KDM1A_HUMAN Lysine-specific histone demethylase 1A OS=Homo sapiens OX=9606 GN=KDM1A PE=1 SV=2	1	1	1	1	2.3	2.3	2.3	92.902	852	852	0.0035971	0.73065	4845800	1				154	8256	TRUE	8483	11311	11794	11794
O60343	O60343	1	1	1	TBC1 domain family member 4	TBC1D4	sp|O60343|TBCD4_HUMAN TBC1 domain family member 4 OS=Homo sapiens OX=9606 GN=TBC1D4 PE=1 SV=2	1	1	1	1	1.2	1.2	1.2	146.56	1298	1298	0.0049822	0.67646	6622900	1				155	711	TRUE	728	935	960	960
O60437	O60437	10	10	10	Periplakin	PPL	sp|O60437|PEPL_HUMAN Periplakin OS=Homo sapiens OX=9606 GN=PPL PE=1 SV=4	1	10	10	10	9.5	9.5	9.5	204.74	1756	1756	0	22.654	88375000	11				156	274;2022;4358;4770;6048;6406;7089;7196;8430;8822	True;True;True;True;True;True;True;True;True;True	284;2067;4452;4872;6185;6551;7267;7380;8661;9056	362;2693;5882;6430;8151;8715;9691;9692;9837;11558;12032	372;2800;6098;6672;8466;9072;10093;10094;10249;12052;12530	372;2800;6098;6672;8466;9072;10093;10249;12052;12530
O60506	O60506	28	28	23	Heterogeneous nuclear ribonucleoprotein Q	SYNCRIP	sp|O60506|HNRPQ_HUMAN Heterogeneous nuclear ribonucleoprotein Q OS=Homo sapiens OX=9606 GN=SYNCRIP PE=1 SV=2	1	28	28	23	50.1	50.1	42.4	69.602	623	623	0	293.56	3096000000	47				157	239;284;337;513;713;1164;1169;1304;1414;1621;1922;2654;3131;4344;4490;4653;4838;4839;5512;5923;6748;7631;7689;8066;8730;8731;8861;9055	True;True;True;True;True;True;True;True;True;True;True;True;True;True;True;True;True;True;True;True;True;True;True;True;True;True;True;True	247;294;348;526;730;1189;1194;1335;1449;1659;1964;2714;3202;4438;4586;4754;4940;4941;5626;6057;6910;7836;7894;8289;8965;8966;9096;9294	313;374;442;443;444;666;667;937;1540;1541;1547;1548;1727;1728;1870;1871;2169;2170;2560;3528;3529;4206;5858;5859;6047;6048;6049;6287;6288;6508;6509;6510;6511;7424;7425;7983;9198;10448;10528;10529;11063;11064;11065;11922;11923;11924;11925;12083;12347	320;384;452;453;454;680;681;962;1587;1588;1594;1595;1596;1786;1787;1936;1937;2248;2249;2666;3668;3669;4378;6071;6072;6272;6273;6274;6522;6523;6754;6755;6756;6757;7706;7707;8283;9569;10890;10975;10976;11535;11536;11537;12420;12421;12422;12423;12583;12856	320;384;454;680;962;1588;1595;1786;1937;2249;2666;3668;4378;6072;6272;6522;6756;6757;7707;8283;9569;10890;10976;11537;12420;12423;12583;12856
O60573	O60573	3	3	3	Eukaryotic translation initiation factor 4E type 2	EIF4E2	sp|O60573|IF4E2_HUMAN Eukaryotic translation initiation factor 4E type 2 OS=Homo sapiens OX=9606 GN=EIF4E2 PE=1 SV=1	1	3	3	3	18	18	18	28.362	245	245	0	6.4548	39129000	4				158	820;4944;6356	True;True;True	840;5051;6501	1097;6697;6698;8644	1127;6958;6959;9001	1127;6959;9001
O60610	O60610	12	12	12	Protein diaphanous homolog 1	DIAPH1	sp|O60610|DIAP1_HUMAN Protein diaphanous homolog 1 OS=Homo sapiens OX=9606 GN=DIAPH1 PE=1 SV=2	1	12	12	12	13.1	13.1	13.1	141.35	1272	1272	0	88.459	204750000	13				159	1235;1399;1800;1876;2401;4699;4780;5381;5586;6282;8259;8645	True;True;True;True;True;True;True;True;True;True;True;True	1265;1434;1839;1917;2457;4800;4882;5494;5701;6426;8486;8879	1638;1851;1852;2397;2497;3196;6348;6441;6442;7255;7523;8542;11314;11820	1692;1917;1918;2483;2593;3329;6586;6685;6686;7531;7806;8898;11797;12317	1692;1917;2483;2593;3329;6586;6685;7531;7806;8898;11797;12317
O60684;O15131	O60684	3;1	3;1	2;0	Importin subunit alpha-7	KPNA6	sp|O60684|IMA7_HUMAN Importin subunit alpha-7 OS=Homo sapiens OX=9606 GN=KPNA6 PE=1 SV=1	2	3	3	2	8.6	8.6	6	60.029	536	536;536	0	7.1355	18732000	3				160	1443;1912;4011	True;True;True	1480;1954;4099	1914;2548;5386	1985;2652;5591	1985;2652;5591
O60701	O60701	10	10	10	UDP-glucose 6-dehydrogenase	UGDH	sp|O60701|UGDH_HUMAN UDP-glucose 6-dehydrogenase OS=Homo sapiens OX=9606 GN=UGDH PE=1 SV=1	1	10	10	10	27.7	27.7	27.7	55.023	494	494	0	15.751	81561000	7				161	800;1383;1993;3423;3792;4360;5668;5943;8429;8462	True;True;True;True;True;True;True;True;True;True	819;1418;2037;3503;3880;4454;5791;6078;8660;8693	1063;1834;2655;4649;5113;5884;7641;8007;11557;11599	1091;1899;2761;4831;5306;6100;7928;8307;12051;12093	1091;1899;2761;4831;5306;6100;7928;8307;12051;12093
O60716	O60716	23	23	23	Catenin delta-1	CTNND1	sp|O60716|CTND1_HUMAN Catenin delta-1 OS=Homo sapiens OX=9606 GN=CTNND1 PE=1 SV=1	1	23	23	23	34.5	34.5	34.5	108.17	968	968	0	111.12	720070000	31				162	481;1227;2061;2252;2800;3137;3399;4038;4111;4247;5428;5584;5794;5978;6455;6791;6890;7119;7222;7409;7819;8012;9213	True;True;True;True;True;True;True;True;True;True;True;True;True;True;True;True;True;True;True;True;True;True;True	494;1255;2108;2304;2867;3208;3479;4126;4201;4338;5542;5699;5927;6113;6601;6953;7059;7298;7406;7601;8029;8234;9455	626;627;1625;1626;2745;2746;3002;3003;3761;3762;4212;4616;5422;5518;5704;5705;7318;7521;7807;8059;8789;8790;8791;9249;9379;9731;9866;9867;10110;10703;10704;10985;12536	639;640;1677;1678;2854;2855;3128;3129;3916;3917;4384;4797;5628;5725;5912;5913;7594;7804;8100;8368;9151;9152;9153;9621;9757;10134;10278;10279;10536;11160;11161;11452;13051	640;1677;2855;3129;3916;4384;4797;5628;5725;5912;7594;7804;8100;8368;9151;9621;9757;10134;10279;10536;11160;11452;13051
O60762	O60762	4	4	4	Dolichol-phosphate mannosyltransferase subunit 1	DPM1	sp|O60762|DPM1_HUMAN Dolichol-phosphate mannosyltransferase subunit 1 OS=Homo sapiens OX=9606 GN=DPM1 PE=1 SV=1	1	4	4	4	26.2	26.2	26.2	29.634	260	260	0	19.202	69986000	4				163	2560;3166;4681;6411	True;True;True;True	2620;3237;4782;6556	3410;4253;6328;8724	3548;4426;4427;6565;9081	3548;4427;6565;9081
Q99880;Q99879;Q99877;Q93079;Q5QNW6;P62807;P58876;P57053;O60814;Q96A08	Q99880;Q99879;Q99877;Q93079;Q5QNW6;P62807;P58876;P57053;O60814	4;4;4;4;4;4;4;4;4;1	4;4;4;4;4;4;4;4;4;1	2;2;2;2;2;2;2;2;2;0	Histone H2B type 1-L;Histone H2B type 1-M;Histone H2B type 1-N;Histone H2B type 1-H;Histone H2B type 2-F;Histone H2B type 1-C/E/F/G/I;Histone H2B type 1-D;Histone H2B type F-S;Histone H2B type 1-K	HIST1H2BL;HIST1H2BM;HIST1H2BN;HIST1H2BH;HIST2H2BF;HIST1H2BC;HIST1H2BD;H2BFS;HIST1H2BK	sp|Q99880|H2B1L_HUMAN Histone H2B type 1-L OS=Homo sapiens OX=9606 GN=HIST1H2BL PE=1 SV=3;sp|Q99879|H2B1M_HUMAN Histone H2B type 1-M OS=Homo sapiens OX=9606 GN=HIST1H2BM PE=1 SV=3;sp|Q99877|H2B1N_HUMAN Histone H2B type 1-N OS=Homo sapiens OX=9606 GN=HIST1H	10	4	4	2	27	27	7.9	13.952	126	126;126;126;126;126;126;126;126;126;127	0	17.072	167820000	7				164	516;2000;4109;4977	True;True;True;True	529;530;2044;4199;5084	671;672;2664;5515;5516;6740	685;686;687;2770;5722;5723;7002	686;2770;5722;7002	59		60
O60832	O60832	2	2	2	H/ACA ribonucleoprotein complex subunit 4	DKC1	sp|O60832|DKC1_HUMAN H/ACA ribonucleoprotein complex subunit DKC1 OS=Homo sapiens OX=9606 GN=DKC1 PE=1 SV=3	1	2	2	2	5.8	5.8	5.8	57.673	514	514	0	5.6011	15365000	3				165	100;419	True;True	101;432	128;554;555	131;567;568	131;567
O60841	O60841	18	18	18	Eukaryotic translation initiation factor 5B	EIF5B	sp|O60841|IF2P_HUMAN Eukaryotic translation initiation factor 5B OS=Homo sapiens OX=9606 GN=EIF5B PE=1 SV=4	1	18	18	18	22.7	22.7	22.7	138.83	1220	1220	0	116.61	830250000	22				166	136;467;563;951;1263;1528;1638;2030;3367;3748;3825;4264;4845;5916;7703;7704;7886;8777	True;True;True;True;True;True;True;True;True;True;True;True;True;True;True;True;True;True	139;480;577;974;1294;1565;1676;2075;3445;3833;3913;4356;4947;6050;7909;7910;8101;9011	181;611;728;729;1272;1676;2020;2188;2702;4554;4555;5052;5153;5154;5730;6522;6523;7966;7967;10554;10555;10796;10797;11978;11979	184;624;743;744;1310;1733;2094;2268;2809;4734;4735;5245;5348;5349;5939;6768;6769;8266;8267;11003;11004;11254;11255;12476;12477	184;624;743;1310;1733;2094;2268;2809;4735;5245;5349;5939;6768;8267;11003;11004;11254;12477		8		214
O60884	O60884	4	4	4	DnaJ homolog subfamily A member 2	DNAJA2	sp|O60884|DNJA2_HUMAN DnaJ homolog subfamily A member 2 OS=Homo sapiens OX=9606 GN=DNAJA2 PE=1 SV=1	1	4	4	4	20.1	20.1	20.1	45.745	412	412	0	35.823	97299000	7				167	1723;3949;5273;8699	True;True;True;True	1761;4037;5386;8934	2294;2295;5306;5307;7125;7126;11889	2376;2377;5510;5511;7401;7402;12387	2376;5510;7401;12387
O60888	O60888	1	1	1	Protein CutA	CUTA	sp|O60888|CUTA_HUMAN Protein CutA OS=Homo sapiens OX=9606 GN=CUTA PE=1 SV=2	1	1	1	1	7.8	7.8	7.8	19.116	179	179	0.000777	1.2696	3040100	1				168	7870	TRUE	8083	10776	11234	11234
O60934	O60934	1	1	1	Nibrin	NBN	sp|O60934|NBN_HUMAN Nibrin OS=Homo sapiens OX=9606 GN=NBN PE=1 SV=1	1	1	1	1	2.3	2.3	2.3	84.958	754	754	0.00080515	1.5164	0	1				169	7959	TRUE	8179	10911	11375	11375
O75027	O75027	3	3	3	ATP-binding cassette sub-family B member 7, mitochondrial	ABCB7	sp|O75027|ABCB7_HUMAN ATP-binding cassette sub-family B member 7, mitochondrial OS=Homo sapiens OX=9606 GN=ABCB7 PE=1 SV=2	1	3	3	3	7	7	7	82.64	752	752	0	4.4889	7706600	3				170	354;4383;8085	True;True;True	365;4478;8308	467;5912;11090	478;6129;11563	478;6129;11563
O75083	O75083	6	6	6	WD repeat-containing protein 1	WDR1	sp|O75083|WDR1_HUMAN WD repeat-containing protein 1 OS=Homo sapiens OX=9606 GN=WDR1 PE=1 SV=4	1	6	6	6	20.6	20.6	20.6	66.193	606	606	0	17.496	44604000	4				171	310;2133;2210;4448;7414;8986	True;True;True;True;True;True	321;2183;2260;4544;7606;9223	407;2842;2946;6001;10119;12250	417;2960;3070;6223;10546;12754	417;2960;3070;6223;10546;12754
O75116;Q13464	O75116	18;2	18;2	18;2	Rho-associated protein kinase 2	ROCK2	sp|O75116|ROCK2_HUMAN Rho-associated protein kinase 2 OS=Homo sapiens OX=9606 GN=ROCK2 PE=1 SV=4	2	18	18	18	18.9	18.9	18.9	160.9	1388	1388;1354	0	59.862	225190000	20				172	243;1784;1785;1825;1833;2002;2544;3525;3556;4548;4606;5951;6073;6936;7134;7213;7633;8371	True;True;True;True;True;True;True;True;True;True;True;True;True;True;True;True;True;True	251;1823;1824;1864;1872;2046;2602;3605;3636;4645;4705;6086;6211;7109;7316;7397;7838;8600	319;2379;2380;2426;2434;2667;2668;3388;4766;4805;6134;6210;8016;8201;9463;9762;9857;10451;10452;11467	326;2463;2464;2514;2522;2773;2774;3526;4951;4990;6364;6443;8316;8523;8524;9852;10169;10269;10893;10894;11955	326;2463;2464;2514;2522;2773;3526;4951;4990;6364;6443;8316;8524;9852;10169;10269;10893;11955
O75131;Q96FN4;Q8IYJ1;Q96A23;O95741;Q86YQ8;Q9HCH3;Q9UBL6	O75131;Q96FN4;Q8IYJ1;Q96A23;O95741;Q86YQ8;Q9HCH3;Q9UBL6	1;1;1;1;1;1;1;1	1;1;1;1;1;1;1;1	1;1;1;1;1;1;1;1	Copine-3;Copine-2;Copine-9;Copine-4;Copine-6;Copine-8;Copine-5;Copine-7	CPNE3;CPNE2;CPNE9;CPNE4;CPNE6;CPNE8;CPNE5;CPNE7	sp|O75131|CPNE3_HUMAN Copine-3 OS=Homo sapiens OX=9606 GN=CPNE3 PE=1 SV=1;sp|Q96FN4|CPNE2_HUMAN Copine-2 OS=Homo sapiens OX=9606 GN=CPNE2 PE=1 SV=3;sp|Q8IYJ1|CPNE9_HUMAN Copine-9 OS=Homo sapiens OX=9606 GN=CPNE9 PE=1 SV=3;sp|Q96A23|CPNE4_HUMAN Copine-4 OS=	8	1	1	1	1.7	1.7	1.7	60.13	537	537;548;553;557;557;564;593;633	0	2.2077	0	1				173	1126	TRUE	1149	1483	1528	1528
O75150	O75150	1	1	1	E3 ubiquitin-protein ligase BRE1B	RNF40	sp|O75150|BRE1B_HUMAN E3 ubiquitin-protein ligase BRE1B OS=Homo sapiens OX=9606 GN=RNF40 PE=1 SV=5	1	1	1	1	1	1	1	113.68	1001	1001	0	2.1536	5932800	0				174	5180	TRUE	5291	6988	7258	7258
O75153;Q9Y5I4	O75153	20;1	20;1	20;1	Clustered mitochondria protein homolog	CLUH	sp|O75153|CLU_HUMAN Clustered mitochondria protein homolog OS=Homo sapiens OX=9606 GN=CLUH PE=1 SV=2	2	20	20	20	23.2	23.2	23.2	146.67	1309	1309;1007	0	66.683	219220000	22				175	655;776;967;1294;2330;2367;2558;2703;3250;3587;4734;6064;6537;6818;7018;7019;7608;8320;8439;8721	True;True;True;True;True;True;True;True;True;True;True;True;True;True;True;True;True;True;True;True	672;794;990;1325;2383;2422;2616;2764;3324;3667;4835;6202;6686;6984;7194;7195;7810;8549;8670;8956	856;1034;1292;1714;3096;3149;3403;3592;3593;4374;4845;6386;8189;8905;9289;9599;9600;9601;10400;11397;11568;11913	877;1062;1331;1773;3223;3280;3541;3736;3737;4550;5030;6627;8510;9271;9661;9996;9997;9998;10841;11883;12062;12411	877;1062;1331;1773;3223;3280;3541;3736;4550;5030;6627;8510;9271;9661;9996;9997;10841;11883;12062;12411
O75165	O75165	2	2	2	DnaJ homolog subfamily C member 13	DNAJC13	sp|O75165|DJC13_HUMAN DnaJ homolog subfamily C member 13 OS=Homo sapiens OX=9606 GN=DNAJC13 PE=1 SV=5	1	2	2	2	1.2	1.2	1.2	254.41	2243	2243	0.0056378	0.63971	9958900	2				176	9015;9229	True;True	9253;9471	12289;12554	12794;13069	12794;13069
Q8IWZ3;O75179	Q8IWZ3;O75179	1;1	1;1	1;1	Ankyrin repeat and KH domain-containing protein 1;Ankyrin repeat domain-containing protein 17	ANKHD1;ANKRD17	sp|Q8IWZ3|ANKH1_HUMAN Ankyrin repeat and KH domain-containing protein 1 OS=Homo sapiens OX=9606 GN=ANKHD1 PE=1 SV=1;sp|O75179|ANR17_HUMAN Ankyrin repeat domain-containing protein 17 OS=Homo sapiens OX=9606 GN=ANKRD17 PE=1 SV=3	2	1	1	1	0.8	0.8	0.8	269.45	2542	2542;2603	0	7.2444	2970200	1				177	6129	TRUE	6268	8283	8610	8610
O75223	O75223	1	1	1	Gamma-glutamylcyclotransferase	GGCT	sp|O75223|GGCT_HUMAN Gamma-glutamylcyclotransferase OS=Homo sapiens OX=9606 GN=GGCT PE=1 SV=1	1	1	1	1	5.3	5.3	5.3	21.007	188	188	0.0021978	0.8341	7113700	1				178	8676	TRUE	8911	11859	12357	12357
O75330	O75330	3	3	3	Hyaluronan mediated motility receptor	HMMR	sp|O75330|HMMR_HUMAN Hyaluronan mediated motility receptor OS=Homo sapiens OX=9606 GN=HMMR PE=1 SV=2	1	3	3	3	5.7	5.7	5.7	84.099	724	724	0	7.7115	36546000	3				179	492;1836;5059	True;True;True	505;1875;5168	639;2437;6836	652;2525;7098	652;2525;7098
O75352	O75352	1	1	1	Mannose-P-dolichol utilization defect 1 protein	MPDU1	sp|O75352|MPU1_HUMAN Mannose-P-dolichol utilization defect 1 protein OS=Homo sapiens OX=9606 GN=MPDU1 PE=1 SV=2	1	1	1	1	5.7	5.7	5.7	26.638	247	247	0	1.663	6433000	1				180	2847	TRUE	2915	3826	3981	3981
O75369;Q14315	O75369	31;3	28;1	28;1	Filamin-B	FLNB	sp|O75369|FLNB_HUMAN Filamin-B OS=Homo sapiens OX=9606 GN=FLNB PE=1 SV=2	2	31	28	28	19.8	18.5	18.5	278.16	2602	2602;2725	0	128.39	412140000	28				181	31;313;315;425;580;927;1062;1161;1460;1506;2548;2854;3368;3820;4517;4769;4956;6433;7161;7164;7601;8118;8155;8216;8322;8445;8722;8779;9054;9220;9241	True;True;True;True;True;True;True;True;True;True;True;True;True;True;True;False;False;False;True;True;True;True;True;True;True;True;True;True;True;True;True	32;324;326;438;596;950;1085;1185;1497;1543;2606;2922;3446;3908;4613;4871;5063;6579;7344;7347;7803;8341;8380;8443;8551;8676;8957;9013;9293;9462;9483	37;410;412;563;757;1242;1243;1408;1535;1934;1989;3392;3835;4556;4557;5148;6080;6429;6713;8763;9793;9796;10392;11128;11178;11258;11399;11576;11914;11982;12346;12543;12566	37;420;422;576;772;1280;1281;1453;1581;2005;2062;3530;3990;4736;4737;5343;6305;6671;6975;9124;10201;10205;10833;11602;11654;11737;11885;12070;12412;12480;12855;13058;13081	37;420;422;576;772;1281;1453;1581;2005;2062;3530;3990;4737;5343;6305;6671;6975;9124;10201;10205;10833;11602;11654;11737;11885;12070;12412;12480;12855;13058;13081
O75396	O75396	1	1	1	Vesicle-trafficking protein SEC22b	SEC22B	sp|O75396|SC22B_HUMAN Vesicle-trafficking protein SEC22b OS=Homo sapiens OX=9606 GN=SEC22B PE=1 SV=4	1	1	1	1	5.6	5.6	5.6	24.593	215	215	0	7.7512	8989700	0				182	3787	TRUE	3875	5108	5301	5301
O75439	O75439	3	3	3	Mitochondrial-processing peptidase subunit beta	PMPCB	sp|O75439|MPPB_HUMAN Mitochondrial-processing peptidase subunit beta OS=Homo sapiens OX=9606 GN=PMPCB PE=1 SV=2	1	3	3	3	10.4	10.4	10.4	54.366	489	489	0	12.391	21492000	4				183	770;1218;3997	True;True;True	788;1245;4085	1024;1612;5370;5371	1051;1663;5574;5575	1051;1663;5575
O75475	O75475	1	1	1	PC4 and SFRS1-interacting protein	PSIP1	sp|O75475|PSIP1_HUMAN PC4 and SFRS1-interacting protein OS=Homo sapiens OX=9606 GN=PSIP1 PE=1 SV=1	1	1	1	1	3.2	3.2	3.2	60.103	530	530	0	2.0805	3862700	1				184	5139	TRUE	5249	6931	7196	7196
O75477	O75477	3	1	1	Erlin-1	ERLIN1	sp|O75477|ERLN1_HUMAN Erlin-1 OS=Homo sapiens OX=9606 GN=ERLIN1 PE=1 SV=2	1	3	1	1	13.8	6.9	6.9	39.171	348	348	0.0021946	0.83223	5702600	1				185	2707;3895;7389	True;False;False	2768;3983;7581	3598;5239;10088	3742;5437;10513	3742;5437;10513
O75533	O75533	22	22	22	Splicing factor 3B subunit 1	SF3B1	sp|O75533|SF3B1_HUMAN Splicing factor 3B subunit 1 OS=Homo sapiens OX=9606 GN=SF3B1 PE=1 SV=3	1	22	22	22	23.3	23.3	23.3	145.83	1304	1304	0	86.311	418570000	25				186	215;345;348;1426;2069;3461;3982;4010;4022;4042;4217;5046;5047;5326;5348;5678;6426;7108;7536;8400;8583;8637	True;True;True;True;True;True;True;True;True;True;True;True;True;True;True;True;True;True;True;True;True;True	223;356;359;1462;2116;3541;4070;4098;4110;4130;4308;5155;5156;5439;5461;5801;6571;7287;7733;8630;8817;8871	284;454;455;459;1887;2755;4692;5350;5351;5385;5399;5400;5426;5427;5660;6820;6821;7191;7219;7652;7653;8743;9718;10291;11513;11514;11745;11811	289;465;466;470;1954;2864;4877;5554;5555;5590;5604;5605;5632;5633;5867;7082;7083;7467;7495;7940;7941;9101;10120;10728;12004;12005;12241;12308	289;465;470;1954;2864;4877;5555;5590;5604;5632;5867;7082;7083;7467;7495;7940;9101;10120;10728;12004;12241;12308
O75534	O75534	4	4	4	Cold shock domain-containing protein E1	CSDE1	sp|O75534|CSDE1_HUMAN Cold shock domain-containing protein E1 OS=Homo sapiens OX=9606 GN=CSDE1 PE=1 SV=2	1	4	4	4	6	6	6	88.884	798	798	0	14.21	92822000	4				187	1276;3075;5369;8261	True;True;True;True	1307;3146;5482;8488	1691;4140;7241;11316	1748;4309;7517;11799	1748;4309;7517;11799
O75569	O75569	2	2	2	Interferon-inducible double-stranded RNA-dependent protein kinase activator A	PRKRA	sp|O75569|PRKRA_HUMAN Interferon-inducible double-stranded RNA-dependent protein kinase activator A OS=Homo sapiens OX=9606 GN=PRKRA PE=1 SV=1	1	2	2	2	10.2	10.2	10.2	34.404	313	313	0	2.8056	39059000	3				188	6808;7072	True;True	6974;7248	9278;9279;9671	9650;9651;10072	9650;10072
O75592	O75592	1	1	1	E3 ubiquitin-protein ligase MYCBP2	MYCBP2	sp|O75592|MYCB2_HUMAN E3 ubiquitin-protein ligase MYCBP2 OS=Homo sapiens OX=9606 GN=MYCBP2 PE=1 SV=4	1	1	1	1	0.3	0.3	0.3	513.63	4678	4678	0.0075967	0.57675	2828800	1				189	3421	TRUE	3501	4646	4827	4827
O75643	O75643	16	16	16	U5 small nuclear ribonucleoprotein 200 kDa helicase	SNRNP200	sp|O75643|U520_HUMAN U5 small nuclear ribonucleoprotein 200 kDa helicase OS=Homo sapiens OX=9606 GN=SNRNP200 PE=1 SV=2	1	16	16	16	11.1	11.1	11.1	244.5	2136	2136	0	34.359	142980000	15				190	1079;1096;2342;2844;4563;4792;5127;5784;6244;6631;7651;7782;7810;8820;8922;9186	True;True;True;True;True;True;True;True;True;True;True;True;True;True;True;True	1102;1119;2395;2911;4660;4894;5237;5917;6386;6783;7856;7991;8020;9054;9158;9427	1428;1449;3113;3821;6149;6456;6457;6916;7797;8440;9034;10481;10657;10694;12030;12161;12503	1473;1494;3240;3976;6379;6700;6701;7181;8090;8773;9401;10926;11113;11151;12528;12661;13015	1473;1494;3240;3976;6379;6700;7181;8090;8773;9401;10926;11113;11151;12528;12661;13015
O75688	O75688	1	1	1	Protein phosphatase 1B	PPM1B	sp|O75688|PPM1B_HUMAN Protein phosphatase 1B OS=Homo sapiens OX=9606 GN=PPM1B PE=1 SV=1	1	1	1	1	1.3	1.3	1.3	52.642	479	479	0.0035842	0.70088	4615500	1				191	5426	TRUE	5540	7315	7591	7591
O75694	O75694	22	22	22	Nuclear pore complex protein Nup155	NUP155	sp|O75694|NU155_HUMAN Nuclear pore complex protein Nup155 OS=Homo sapiens OX=9606 GN=NUP155 PE=1 SV=1	1	22	22	22	25.2	25.2	25.2	155.2	1391	1391	0	143.44	539950000	23				192	1129;1724;2877;3090;3209;3269;3295;3916;3921;4246;4367;4762;4791;4941;5018;5503;5504;6219;6555;7298;8104;9250	True;True;True;True;True;True;True;True;True;True;True;True;True;True;True;True;True;True;True;True;True;True	1152;1762;2945;3161;3281;3343;3370;4004;4009;4337;4462;4864;4893;5048;5127;5617;5618;6361;6705;7489;8327;9492	1486;2296;3879;4157;4314;4315;4403;4443;5265;5271;5703;5893;6421;6455;6694;6789;7414;7415;8407;8929;9976;9977;11112;12576	1531;2378;4040;4327;4488;4489;4579;4622;5464;5470;5911;6109;6663;6699;6955;7051;7696;7697;8739;9295;10396;10397;11585;13091	1531;2378;4040;4327;4488;4579;4622;5464;5470;5911;6109;6663;6699;6955;7051;7696;7697;8739;9295;10397;11585;13091
O75746	O75746	7	5	5	Calcium-binding mitochondrial carrier protein Aralar1	SLC25A12	sp|O75746|CMC1_HUMAN Calcium-binding mitochondrial carrier protein Aralar1 OS=Homo sapiens OX=9606 GN=SLC25A12 PE=1 SV=2	1	7	5	5	16.8	13.4	13.4	74.761	678	678	0	20.352	46248000	5				193	285;1105;2466;3271;3434;5884;9025	False;True;True;True;True;True;False	295;1128;2523;3346;3514;6018;9263	375;1458;3277;4407;4663;7927;12305	385;1503;3414;4583;4847;8226;12813	385;1503;3414;4583;4847;8226;12813
O75815	O75815	1	1	1	Breast cancer anti-estrogen resistance protein 3	BCAR3	sp|O75815|BCAR3_HUMAN Breast cancer anti-estrogen resistance protein 3 OS=Homo sapiens OX=9606 GN=BCAR3 PE=1 SV=1	1	1	1	1	1.1	1.1	1.1	92.565	825	825	0.004954	0.658	15634000	1				194	414	TRUE	427	547	560	560
O75821	O75821	9	9	9	Eukaryotic translation initiation factor 3 subunit G	EIF3G	sp|O75821|EIF3G_HUMAN Eukaryotic translation initiation factor 3 subunit G OS=Homo sapiens OX=9606 GN=EIF3G PE=1 SV=2	1	9	9	9	44.1	44.1	44.1	35.611	320	320	0	41.182	421790000	12				195	1750;1762;1763;2006;2233;2644;2798;4117;6236	True;True;True;True;True;True;True;True;True	1789;1801;1802;2050;2283;2704;2865;4207;6378	2337;2354;2355;2356;2672;2977;3514;3515;3758;3759;5525;8426	2420;2438;2439;2440;2778;3101;3654;3655;3913;3914;5732;8759	2420;2438;2440;2778;3101;3655;3914;5732;8759
O75822	O75822	3	3	3	Eukaryotic translation initiation factor 3 subunit J	EIF3J	sp|O75822|EIF3J_HUMAN Eukaryotic translation initiation factor 3 subunit J OS=Homo sapiens OX=9606 GN=EIF3J PE=1 SV=2	1	3	3	3	16.7	16.7	16.7	29.062	258	258	0	23.645	87192000	3				196	2007;3965;5189	True;True;True	2051;4053;5300	2673;5328;6998	2779;5532;7268	2779;5532;7268
O75844	O75844	1	1	1	CAAX prenyl protease 1 homolog	ZMPSTE24	sp|O75844|FACE1_HUMAN CAAX prenyl protease 1 homolog OS=Homo sapiens OX=9606 GN=ZMPSTE24 PE=1 SV=2	1	1	1	1	2.1	2.1	2.1	54.812	475	475	0	1.826	23249000	2				197	4843	TRUE	4945	6519;6520	6765;6766	6766
O75909	O75909	1	1	1	Cyclin-K	CCNK	sp|O75909|CCNK_HUMAN Cyclin-K OS=Homo sapiens OX=9606 GN=CCNK PE=1 SV=2	1	1	1	1	4.1	4.1	4.1	64.239	580	580	0.0022727	1.0331	9966300	1				198	4255	TRUE	4347	5719	5927	5927
O75915	O75915	3	3	3	PRA1 family protein 3	ARL6IP5	sp|O75915|PRAF3_HUMAN PRA1 family protein 3 OS=Homo sapiens OX=9606 GN=ARL6IP5 PE=1 SV=1	1	3	3	3	20.7	20.7	20.7	21.614	188	188	0	10.549	49463000	3				199	827;5562;7842	True;True;True	847;5677;8052	1104;7494;10730	1134;7777;11188	1134;7777;11188
O75934	O75934	1	1	1	Pre-mRNA-splicing factor SPF27	BCAS2	sp|O75934|SPF27_HUMAN Pre-mRNA-splicing factor SPF27 OS=Homo sapiens OX=9606 GN=BCAS2 PE=1 SV=1	1	1	1	1	12.4	12.4	12.4	26.131	225	225	0	5.7104	5211300	1				200	292	TRUE	302	382	392	392
O75940	O75940	2	2	2	Survival of motor neuron-related-splicing factor 30	SMNDC1	sp|O75940|SPF30_HUMAN Survival of motor neuron-related-splicing factor 30 OS=Homo sapiens OX=9606 GN=SMNDC1 PE=1 SV=1	1	2	2	2	20.2	20.2	20.2	26.711	238	238	0	17.297	14716000	2				201	621;1189	True;True	638;1215	812;1574	828;1624	828;1624
O75976	O75976	8	8	8	Carboxypeptidase D	CPD	sp|O75976|CBPD_HUMAN Carboxypeptidase D OS=Homo sapiens OX=9606 GN=CPD PE=1 SV=2	1	8	8	8	8.5	8.5	8.5	152.93	1380	1380	0	18.145	90809000	9				202	780;1814;1980;3995;5345;7155;7287;9271	True;True;True;True;True;True;True;True	798;1853;2023;4083;5458;7338;7475;9513	1039;2414;2640;5366;7213;9787;9956;12648;12649	1067;2501;2746;5570;7489;10195;10374;13172;13173	1067;2501;2746;5570;7489;10195;10374;13173
O76021	O76021	5	5	5	Ribosomal L1 domain-containing protein 1	RSL1D1	sp|O76021|RL1D1_HUMAN Ribosomal L1 domain-containing protein 1 OS=Homo sapiens OX=9606 GN=RSL1D1 PE=1 SV=3	1	5	5	5	14.5	14.5	14.5	54.972	490	490	0	23.827	154850000	6				203	1717;3585;5031;6805;8016	True;True;True;True;True	1755;3665;5140;6971;8239	2287;4842;4843;6804;9274;11000	2369;5027;5028;7066;9646;11470	2369;5027;7066;9646;11470
O76031	O76031	1	1	1	ATP-dependent Clp protease ATP-binding subunit clpX-like, mitochondrial	CLPX	sp|O76031|CLPX_HUMAN ATP-dependent Clp protease ATP-binding subunit clpX-like, mitochondrial OS=Homo sapiens OX=9606 GN=CLPX PE=1 SV=2	1	1	1	1	1.6	1.6	1.6	69.223	633	633	0.005618	0.63208	6987700	0				204	7786	TRUE	7995	10661	11117	11117
O76094	O76094	6	6	6	Signal recognition particle subunit SRP72	SRP72	sp|O76094|SRP72_HUMAN Signal recognition particle subunit SRP72 OS=Homo sapiens OX=9606 GN=SRP72 PE=1 SV=3	1	6	6	6	17.1	17.1	17.1	74.605	671	671	0	13.708	78258000	6				205	1092;3070;4302;7521;8170;8828	True;True;True;True;True;True	1115;3141;4396;7718;8395;9062	1445;4135;5793;10274;11197;12038	1490;4304;6004;10710;11675;12536	1490;4304;6004;10710;11675;12536
O94822	O94822	3	3	3	E3 ubiquitin-protein ligase listerin	LTN1	sp|O94822|LTN1_HUMAN E3 ubiquitin-protein ligase listerin OS=Homo sapiens OX=9606 GN=LTN1 PE=1 SV=6	1	3	3	3	2.9	2.9	2.9	200.55	1766	1766	0	5.1217	23497000	4				206	4884;5075;5842	True;True;True	4987;5184;5975	6594;6855;7870	6851;7117;7118;8163	6851;7118;8163
O94832	O94832	13	13	13	Unconventional myosin-Id	MYO1D	sp|O94832|MYO1D_HUMAN Unconventional myosin-Id OS=Homo sapiens OX=9606 GN=MYO1D PE=1 SV=2	1	13	13	13	18.2	18.2	18.2	116.2	1006	1006	0	42.895	152500000	15				207	1856;3236;3277;3330;3395;3578;3689;6588;7099;7723;8344;8724;8841	True;True;True;True;True;True;True;True;True;True;True;True;True	1897;3309;3352;3407;3475;3658;3772;6738;7278;7929;8573;8959;9076	2477;4353;4414;4500;4501;4612;4835;4978;8969;9705;9706;10577;11430;11916;12057	2573;4529;4590;4679;4680;4793;5020;5169;9336;10107;10108;11026;11916;12414;12557	2573;4529;4590;4680;4793;5020;5169;9336;10107;11026;11916;12414;12557
O94842	O94842	1	1	1	TOX high mobility group box family member 4	TOX4	sp|O94842|TOX4_HUMAN TOX high mobility group box family member 4 OS=Homo sapiens OX=9606 GN=TOX4 PE=1 SV=1	1	1	1	1	2.1	2.1	2.1	66.194	621	621	0	2.8729	8365500	1				208	3808	TRUE	3896	5133	5327	5327
O94905	O94905	6	6	4	Erlin-2	ERLIN2	sp|O94905|ERLN2_HUMAN Erlin-2 OS=Homo sapiens OX=9606 GN=ERLIN2 PE=1 SV=1	1	6	6	4	26.3	26.3	19.2	37.839	339	339	0	18.648	108520000	7				209	2708;3504;3895;4398;5388;7389	True;True;True;True;True;True	2769;3584;3983;4493;5501;7581	3599;4741;5239;5929;5930;7263;10088	3743;4926;5437;6147;6148;7539;10513	3743;4926;5437;6147;7539;10513
O94906	O94906	1	1	1	Pre-mRNA-processing factor 6	PRPF6	sp|O94906|PRP6_HUMAN Pre-mRNA-processing factor 6 OS=Homo sapiens OX=9606 GN=PRPF6 PE=1 SV=1	1	1	1	1	1.8	1.8	1.8	106.92	941	941	0.0056259	0.63335	6663900	1				210	5319	TRUE	5432	7183	7459	7459
O94955	O94955	1	1	1	Rho-related BTB domain-containing protein 3	RHOBTB3	sp|O94955|RHBT3_HUMAN Rho-related BTB domain-containing protein 3 OS=Homo sapiens OX=9606 GN=RHOBTB3 PE=1 SV=2	1	1	1	1	2.3	2.3	2.3	69.413	611	611	0.00080321	1.4855	5699900	1				211	3014	TRUE	3085	4059	4224	4224
O94973	O94973	6	6	4	AP-2 complex subunit alpha-2	AP2A2	sp|O94973|AP2A2_HUMAN AP-2 complex subunit alpha-2 OS=Homo sapiens OX=9606 GN=AP2A2 PE=1 SV=2	1	6	6	4	11	11	8.9	103.96	939	939	0	3.7322	25492000	6				212	451;2494;2827;3640;5003;8808	True;True;True;True;True;True	464;2552;2894;3720;5112;9042	594;3316;3317;3800;4910;6771;12018	607;3453;3454;3955;5100;7033;12516	607;3453;3955;5100;7033;12516
O94979	O94979	1	1	1	Protein transport protein Sec31A	SEC31A	sp|O94979|SC31A_HUMAN Protein transport protein Sec31A OS=Homo sapiens OX=9606 GN=SEC31A PE=1 SV=3	1	1	1	1	0.7	0.7	0.7	133.01	1220	1220	0.0082588	0.56732	0	1				213	4824	TRUE	4926	6493	6739	6739
O95084	O95084	1	1	1	Serine protease 23	PRSS23	sp|O95084|PRS23_HUMAN Serine protease 23 OS=Homo sapiens OX=9606 GN=PRSS23 PE=1 SV=1	1	1	1	1	3.4	3.4	3.4	43.001	383	383	0	1.5979	8304900	1				214	1013	TRUE	1036	1353	1398	1398
O95104	O95104	2	2	2	Splicing factor, arginine/serine-rich 15	SCAF4	sp|O95104|SCAF4_HUMAN SR-related and CTD-associated factor 4 OS=Homo sapiens OX=9606 GN=SCAF4 PE=1 SV=3	1	2	2	2	4.5	4.5	4.5	125.87	1147	1147	0	3.8447	18059000	2				215	1208;3103	True;True	1234;3174	1598;4173	1648;4343	1648;4343
O95163	O95163	6	6	6	Elongator complex protein 1	IKBKAP	sp|O95163|ELP1_HUMAN Elongator complex protein 1 OS=Homo sapiens OX=9606 GN=ELP1 PE=1 SV=3	1	6	6	6	7.2	7.2	7.2	150.25	1332	1332	0	19.019	75847000	7				216	3853;7373;7759;7946;8237;8306	True;True;True;True;True;True	3941;7565;7967;8165;8464;8535	5185;10070;10622;10623;10881;11286;11374	5381;10494;11072;11073;11339;11767;11859	5381;10494;11072;11339;11767;11859
O95232	O95232	2	2	2	Luc7-like protein 3	LUC7L3	sp|O95232|LC7L3_HUMAN Luc7-like protein 3 OS=Homo sapiens OX=9606 GN=LUC7L3 PE=1 SV=2	1	2	2	2	5.8	5.8	5.8	51.466	432	432	0	3.8758	10755000	2				217	5644;9152	True;True	5766;9391	7610;12460	7896;12971	7896;12971
O95239	O95239	4	4	4	Chromosome-associated kinesin KIF4A	KIF4A	sp|O95239|KIF4A_HUMAN Chromosome-associated kinesin KIF4A OS=Homo sapiens OX=9606 GN=KIF4A PE=1 SV=3	1	4	4	4	6.2	6.2	6.2	139.88	1232	1232	0	7.9717	22372000	4				218	2882;3695;5006;5917	True;True;True;True	2950;3778;5115;6051	3884;4986;6774;7968	4045;5177;7036;8268	4045;5177;7036;8268
O95251	O95251	1	1	1	Histone acetyltransferase KAT7	KAT7	sp|O95251|KAT7_HUMAN Histone acetyltransferase KAT7 OS=Homo sapiens OX=9606 GN=KAT7 PE=1 SV=1	1	1	1	1	3.1	3.1	3.1	70.642	611	611	0.0029091	0.80369	0	0				219	8768	TRUE	9002	11966	12464	12464		9;10;11;12;91		43;45;46;56;57
O95292	O95292	2	1	1	Vesicle-associated membrane protein-associated protein B/C	VAPB	sp|O95292|VAPB_HUMAN Vesicle-associated membrane protein-associated protein B/C OS=Homo sapiens OX=9606 GN=VAPB PE=1 SV=3	1	2	1	1	10.7	5.8	5.8	27.228	243	243	0	2.5	8069600	1				220	2940;8207	False;True	3010;8433	3969;11242	4131;11720	4131;11720
O95299	O95299	2	2	2	NADH dehydrogenase [ubiquinone] 1 alpha subcomplex subunit 10, mitochondrial	NDUFA10	sp|O95299|NDUAA_HUMAN NADH dehydrogenase [ubiquinone] 1 alpha subcomplex subunit 10, mitochondrial OS=Homo sapiens OX=9606 GN=NDUFA10 PE=1 SV=1	1	2	2	2	9.6	9.6	9.6	40.75	355	355	0	6.3221	23471000	1				221	5021;8380	True;True	5130;8610	6793;11479	7055;11967	7055;11967
O95336	O95336	1	1	1	6-phosphogluconolactonase	PGLS	sp|O95336|6PGL_HUMAN 6-phosphogluconolactonase OS=Homo sapiens OX=9606 GN=PGLS PE=1 SV=2	1	1	1	1	10.9	10.9	10.9	27.547	258	258	0.0029197	0.82394	3220500	1				222	64	TRUE	65	88	89	89
O95347	O95347	6	6	6	Structural maintenance of chromosomes protein 2	SMC2	sp|O95347|SMC2_HUMAN Structural maintenance of chromosomes protein 2 OS=Homo sapiens OX=9606 GN=SMC2 PE=1 SV=2	1	6	6	6	7.9	7.9	7.9	135.65	1197	1197	0	12.936	50191000	6				223	2891;3260;4210;5513;8480;8633	True;True;True;True;True;True	2959;3334;4301;5627;8711;8867	3894;4389;5652;7426;11624;11807	4055;4565;5859;7708;12118;12304	4055;4565;5859;7708;12118;12304
O95373	O95373	6	6	6	Importin-7	IPO7	sp|O95373|IPO7_HUMAN Importin-7 OS=Homo sapiens OX=9606 GN=IPO7 PE=1 SV=1	1	6	6	6	8.3	8.3	8.3	119.52	1038	1038	0	13.9	147920000	6				224	214;1391;1883;5555;7174;8646	True;True;True;True;True;True	222;1426;1924;5670;7357;8880	283;1842;2505;2506;7486;9806;11821	288;1908;2601;2602;7769;10215;12318	288;1908;2602;7769;10215;12318
O95399	O95399	1	1	1	Urotensin-2	UTS2	sp|O95399|UTS2_HUMAN Urotensin-2 OS=Homo sapiens OX=9606 GN=UTS2 PE=1 SV=1	1	1	1	1	6.5	6.5	6.5	14.295	124	124	0.0015279	1.1049	17662000	1				225	5387	TRUE	5500	7262	7538	7538
O95425	O95425	13	13	13	Supervillin	SVIL	sp|O95425|SVIL_HUMAN Supervillin OS=Homo sapiens OX=9606 GN=SVIL PE=1 SV=2	1	13	13	13	10.1	10.1	10.1	247.74	2214	2214	0	14.577	98076000	13				226	657;1416;3953;4807;5070;5688;6639;7650;7684;8270;8748;9001;9065	True;True;True;True;True;True;True;True;True;True;True;True;True	674;1451;4041;4909;5179;5811;6791;7855;7889;8497;8982;9239;9304	858;1874;5314;6474;6850;7664;9043;10480;10523;11326;11327;11945;12273;12359	879;1940;5518;6718;7112;7952;9410;10925;10970;11809;11810;12443;12777;12868	879;1940;5518;6718;7112;7952;9410;10925;10970;11809;12443;12777;12868		13		2071
O95429	O95429	1	1	1	BAG family molecular chaperone regulator 4	BAG4	sp|O95429|BAG4_HUMAN BAG family molecular chaperone regulator 4 OS=Homo sapiens OX=9606 GN=BAG4 PE=1 SV=1	1	1	1	1	7	7	7	49.593	457	457	0.0022157	0.89144	11562000	1				227	9270	TRUE	9512	12647	13171	13171
O95433	O95433	1	1	1	Activator of 90 kDa heat shock protein ATPase homolog 1	AHSA1	sp|O95433|AHSA1_HUMAN Activator of 90 kDa heat shock protein ATPase homolog 1 OS=Homo sapiens OX=9606 GN=AHSA1 PE=1 SV=1	1	1	1	1	6.5	6.5	6.5	38.274	338	338	0	7.7896	16060000	2				228	8253	TRUE	8480	11308	11790;11791	11791
O95470	O95470	9	9	9	Sphingosine-1-phosphate lyase 1	SGPL1	sp|O95470|SGPL1_HUMAN Sphingosine-1-phosphate lyase 1 OS=Homo sapiens OX=9606 GN=SGPL1 PE=1 SV=3	1	9	9	9	26.4	26.4	26.4	63.523	568	568	0	39.415	152590000	10				229	220;307;472;2785;6088;6185;7825;7935;8084	True;True;True;True;True;True;True;True;True	228;318;485;2852;6227;6326;8035;8154;8307	289;404;617;3737;3738;8229;8357;10710;10867;11089	294;414;630;3892;3893;8553;8688;11167;11325;11562	294;414;630;3893;8553;8688;11167;11325;11562
O95486	O95486	2	2	2	Protein transport protein Sec24A	SEC24A	sp|O95486|SC24A_HUMAN Protein transport protein Sec24A OS=Homo sapiens OX=9606 GN=SEC24A PE=1 SV=2	1	2	2	2	2.6	2.6	2.6	119.75	1093	1093	0	4.4275	14516000	2				230	943;8042	True;True	966;8265	1263;11034	1301;11505	1301;11505
O95487	O95487	5	5	5	Protein transport protein Sec24B	SEC24B	sp|O95487|SC24B_HUMAN Protein transport protein Sec24B OS=Homo sapiens OX=9606 GN=SEC24B PE=1 SV=2	1	5	5	5	7.4	7.4	7.4	137.42	1268	1268	0	11.31	31441000	6				231	944;1213;5144;5745;5894	True;True;True;True;True	967;1240;5254;5875;6028	1264;1606;6936;6937;7748;7938	1302;1657;7201;7202;8040;8238	1302;1657;7202;8040;8238
O95573;O60488	O95573	5;1	5;1	5;1	Long-chain-fatty-acid--CoA ligase 3	ACSL3	sp|O95573|ACSL3_HUMAN Long-chain-fatty-acid--CoA ligase 3 OS=Homo sapiens OX=9606 GN=ACSL3 PE=1 SV=3	2	5	5	5	11	11	11	80.419	720	720;711	0	10.685	45556000	5				232	2789;4969;5309;8501;8915	True;True;True;True;True	2856;5076;5422;8732;9151	3744;6729;7171;11648;12152	3899;6991;7447;12142;12652	3899;6991;7447;12142;12652
O95602	O95602	3	3	3	DNA-directed RNA polymerase I subunit RPA1	POLR1A	sp|O95602|RPA1_HUMAN DNA-directed RNA polymerase I subunit RPA1 OS=Homo sapiens OX=9606 GN=POLR1A PE=1 SV=2	1	3	3	3	3.4	3.4	3.4	194.81	1720	1720	0.0007776	1.2794	17692000	3				233	5372;5415;7237	True;True;True	5485;5529;7422	7245;7302;9889	7521;7578;10302	7521;7578;10302
O95639	O95639	1	1	1	Cleavage and polyadenylation specificity factor subunit 4	CPSF4	sp|O95639|CPSF4_HUMAN Cleavage and polyadenylation specificity factor subunit 4 OS=Homo sapiens OX=9606 GN=CPSF4 PE=1 SV=1	1	1	1	1	4.5	4.5	4.5	30.255	269	269	0.0008058	1.5185	10684000	1				234	5707	TRUE	5832	7694	7983	7983
O95758	O95758	4	3	3	Polypyrimidine tract-binding protein 3	PTBP3	sp|O95758|PTBP3_HUMAN Polypyrimidine tract-binding protein 3 OS=Homo sapiens OX=9606 GN=PTBP3 PE=1 SV=2	1	4	3	3	12	10.5	10.5	59.689	552	552	0	5.3807	47332000	2				235	4170;5847;5944;8763	True;True;True;False	4261;5980;6079;8997	5601;7875;8008;11961	5808;8170;8308;12459	5808;8170;8308;12459
O95793	O95793	7	7	7	Double-stranded RNA-binding protein Staufen homolog 1	STAU1	sp|O95793|STAU1_HUMAN Double-stranded RNA-binding protein Staufen homolog 1 OS=Homo sapiens OX=9606 GN=STAU1 PE=1 SV=2	1	7	7	7	20.3	20.3	20.3	63.182	577	577	0	20.129	112560000	8				236	1823;5153;5700;5769;5771;5818;6829	True;True;True;True;True;True;True	1862;5263;5825;5902;5904;5951;6995	2424;6951;7687;7778;7780;7840;9302	2511;2512;7220;7976;8071;8073;8133;9675	2512;7220;7976;8071;8073;8133;9675
O95816	O95816	4	4	4	BAG family molecular chaperone regulator 2	BAG2	sp|O95816|BAG2_HUMAN BAG family molecular chaperone regulator 2 OS=Homo sapiens OX=9606 GN=BAG2 PE=1 SV=1	1	4	4	4	35.1	35.1	35.1	23.772	211	211	0	22.64	67327000	3				237	1449;2294;6368;6928	True;True;True;True	1486;2347;6513;7101	1920;3052;8663;9452	1991;3178;9020;9840	1991;3178;9020;9840
O95819;Q8N4C8;Q9UKE5	O95819;Q8N4C8;Q9UKE5	4;2;2	4;2;2	4;2;2	Mitogen-activated protein kinase kinase kinase kinase 4;Misshapen-like kinase 1;TRAF2 and NCK-interacting protein kinase	MAP4K4;MINK1;TNIK	sp|O95819|M4K4_HUMAN Mitogen-activated protein kinase kinase kinase kinase 4 OS=Homo sapiens OX=9606 GN=MAP4K4 PE=1 SV=2;sp|Q8N4C8|MINK1_HUMAN Misshapen-like kinase 1 OS=Homo sapiens OX=9606 GN=MINK1 PE=1 SV=2;sp|Q9UKE5|TNIK_HUMAN TRAF2 and NCK-interacting	3	4	4	4	4.7	4.7	4.7	142.1	1239	1239;1332;1360	0	4.8508	33641000	4				238	423;2993;6677;6863	True;True;True;True	436;3063;6834;7029	561;4031;9103;9344	574;4194;9471;9720	574;4194;9471;9720
O95831	O95831	4	4	4	Apoptosis-inducing factor 1, mitochondrial	AIFM1	sp|O95831|AIFM1_HUMAN Apoptosis-inducing factor 1, mitochondrial OS=Homo sapiens OX=9606 GN=AIFM1 PE=1 SV=1	1	4	4	4	11.6	11.6	11.6	66.9	613	613	0	5.4533	21876000	3				239	58;576;4312;7606	True;True;True;True	59;592;4406;7808	80;752;5803;10398	81;767;6014;10839	81;767;6014;10839
O95926	O95926	2	2	2	Pre-mRNA-splicing factor SYF2	SYF2	sp|O95926|SYF2_HUMAN Pre-mRNA-splicing factor SYF2 OS=Homo sapiens OX=9606 GN=SYF2 PE=1 SV=1	1	2	2	2	16	16	16	28.722	243	243	0	6.6107	57667000	2				240	40;4920	True;True	41;5027	48;6670	49;6931	49;6931
O96005	O96005	3	3	3	Cleft lip and palate transmembrane protein 1	CLPTM1	sp|O96005|CLPT1_HUMAN Cleft lip and palate transmembrane protein 1 OS=Homo sapiens OX=9606 GN=CLPTM1 PE=1 SV=1	1	3	3	3	9.6	9.6	9.6	76.096	669	669	0	5.4541	55571000	3				241	1559;6771;8681	True;True;True	1596;6933;8916	2061;9224;11866	2135;9595;12364	2135;9595;12364
O96019	O96019	1	1	1	Actin-like protein 6A	ACTL6A	sp|O96019|ACL6A_HUMAN Actin-like protein 6A OS=Homo sapiens OX=9606 GN=ACTL6A PE=1 SV=1	1	1	1	1	7	7	7	47.46	429	429	0	6.0285	14825000	2				242	7320	TRUE	7511	10003;10004	10426;10427	10426
P00338	P00338	9	9	9	L-lactate dehydrogenase A chain	LDHA	sp|P00338|LDHA_HUMAN L-lactate dehydrogenase A chain OS=Homo sapiens OX=9606 GN=LDHA PE=1 SV=2	1	9	9	9	34	34	34	36.688	332	332	0	19.051	133070000	9				243	1151;1152;1282;2263;2632;4731;5434;6542;8757	True;True;True;True;True;True;True;True;True	1175;1176;1313;2315;2692;4832;5548;6691;8991	1523;1524;1525;1698;3015;3501;6383;7326;8911;11955	1569;1570;1571;1755;3141;3641;6624;7602;9277;12453	1569;1571;1755;3141;3641;6624;7602;9277;12453
P00367;P49448	P00367	15;7	15;7	15;7	Glutamate dehydrogenase 1, mitochondrial	GLUD1	sp|P00367|DHE3_HUMAN Glutamate dehydrogenase 1, mitochondrial OS=Homo sapiens OX=9606 GN=GLUD1 PE=1 SV=2	2	15	15	15	38.7	38.7	38.7	61.397	558	558;558	0	78.985	449940000	20				244	383;878;971;1121;1329;2565;2682;3214;3621;3649;4135;7585;8873;9177;9230	True;True;True;True;True;True;True;True;True;True;True;True;True;True;True	396;899;994;1144;1361;2625;2743;3286;3701;3729;4225;7787;9108;9417;9472	507;508;1167;1297;1475;1476;1763;3416;3566;4324;4325;4889;4919;5555;5556;10367;10368;12098;12489;12555	518;519;1199;1336;1520;1521;1823;3554;3709;4498;4499;5078;5109;5762;5763;10806;10807;12598;13001;13070	519;1199;1336;1521;1823;3554;3709;4499;5078;5109;5762;10806;12598;13001;13070
P00390	P00390	2	2	2	Glutathione reductase, mitochondrial	GSR	sp|P00390|GSHR_HUMAN Glutathione reductase, mitochondrial OS=Homo sapiens OX=9606 GN=GSR PE=1 SV=2	1	2	2	2	9	9	9	56.256	522	522	0.00079114	1.4157	18988000	2				245	2758;4520	True;True	2825;4616	3702;6084	3856;6309	3856;6309
P00505	P00505	1	1	1	Aspartate aminotransferase, mitochondrial	GOT2	sp|P00505|AATM_HUMAN Aspartate aminotransferase, mitochondrial OS=Homo sapiens OX=9606 GN=GOT2 PE=1 SV=3	1	1	1	1	2.8	2.8	2.8	47.517	430	430	0.0056219	0.63226	6133100	0				246	3406	TRUE	3486	4625	4806	4806
P00533	P00533	31	31	31	Epidermal growth factor receptor	EGFR	sp|P00533|EGFR_HUMAN Epidermal growth factor receptor OS=Homo sapiens OX=9606 GN=EGFR PE=1 SV=2	1	31	31	31	43.2	43.2	43.2	134.28	1210	1210	0	256.21	1695900000	40				247	92;93;458;721;1261;1343;1678;1713;1805;1853;2604;2921;2936;3023;3040;3625;3828;5397;5630;5858;5925;5964;6142;6156;6249;6664;7506;7671;7837;9158;9226	True;True;True;True;True;True;True;True;True;True;True;True;True;True;True;True;True;True;True;True;True;True;True;True;True;True;True;True;True;True;True	93;94;471;739;1292;1375;1716;1751;1844;1893;1894;2664;2991;3006;3094;3111;3705;3916;5510;5751;5991;6059;6099;6282;6296;6392;6820;7703;7876;8047;9397;9468	119;120;601;955;956;1673;1674;1778;2239;2283;2403;2472;2473;3464;3943;3963;3964;4069;4070;4090;4893;5157;7274;7275;7591;7592;7889;7985;8037;8038;8303;8320;8321;8485;9083;9084;10256;10507;10508;10724;12466;12550;12551	122;123;614;981;982;1730;1731;1838;2320;2365;2489;2568;2569;3603;4105;4125;4126;4234;4235;4257;5082;5352;7550;7551;7877;7878;8184;8285;8342;8343;8632;8650;8651;8836;9451;9452;10690;10954;10955;11182;12977;13065;13066	122;123;614;981;1730;1838;2320;2365;2489;2568;3603;4105;4126;4234;4257;5082;5352;7551;7877;8184;8285;8343;8632;8650;8836;9452;10690;10955;11182;12977;13066		92		693
P00558	P00558	1	1	1	Phosphoglycerate kinase 1	PGK1	sp|P00558|PGK1_HUMAN Phosphoglycerate kinase 1 OS=Homo sapiens OX=9606 GN=PGK1 PE=1 SV=3	1	1	1	1	4.3	4.3	4.3	44.614	417	417	0.00078616	1.3601	0	1				248	3963	TRUE	4051	5325	5529	5529
P00846	P00846	1	1	1	ATP synthase subunit a	MT-ATP6	sp|P00846|ATP6_HUMAN ATP synthase subunit a OS=Homo sapiens OX=9606 GN=MT-ATP6 PE=1 SV=1	1	1	1	1	4.4	4.4	4.4	24.817	226	226	0.0022472	0.94744	12343000	1				249	4826	TRUE	4928	6495	6741	6741
P00966	P00966	1	1	1	Argininosuccinate synthase	ASS1	sp|P00966|ASSY_HUMAN Argininosuccinate synthase OS=Homo sapiens OX=9606 GN=ASS1 PE=1 SV=2	1	1	1	1	3.2	3.2	3.2	46.53	412	412	0	2.9131	8085500	1				250	570	TRUE	585	742	757	757
P01031	P01031	1	1	1	Complement C5;Complement C5 beta chain;Complement C5 alpha chain;C5a anaphylatoxin;Complement C5 alpha chain	C5	sp|P01031|CO5_HUMAN Complement C5 OS=Homo sapiens OX=9606 GN=C5 PE=1 SV=4	1	1	1	1	0.7	0.7	0.7	188.3	1676	1676	0.0082248	0.55665	0	0				251	4330	TRUE	4424	5837	6050	6050		93		1607
P01040	P01040	1	1	1	Cystatin-A;Cystatin-A, N-terminally processed	CSTA	sp|P01040|CYTA_HUMAN Cystatin-A OS=Homo sapiens OX=9606 GN=CSTA PE=1 SV=1	1	1	1	1	18.4	18.4	18.4	11.006	98	98	0	2.8627	8955300	1				252	7084	TRUE	7260	9684	10086	10086
P01130	P01130	1	1	1	Low-density lipoprotein receptor	LDLR	sp|P01130|LDLR_HUMAN Low-density lipoprotein receptor OS=Homo sapiens OX=9606 GN=LDLR PE=1 SV=1	1	1	1	1	1.5	1.5	1.5	95.375	860	860	0	2.9589	12745000	1				253	6137	TRUE	6277	8298	8626	8626
P0DOX5;P01857;P01860;P01859;P01861	P0DOX5;P01857;P01860;P01859;P01861	2;2;2;1;1	2;2;2;1;1	2;2;2;1;1	Ig gamma-1 chain C region;Ig gamma-3 chain C region;Ig gamma-2 chain C region;Ig gamma-4 chain C region	IGHG1;IGHG3;IGHG2;IGHG4	sp|P0DOX5|IGG1_HUMAN Immunoglobulin gamma-1 heavy chain OS=Homo sapiens OX=9606 PE=1 SV=2;sp|P01857|IGHG1_HUMAN Immunoglobulin heavy constant gamma 1 OS=Homo sapiens OX=9606 GN=IGHG1 PE=1 SV=1;sp|P01860|IGHG3_HUMAN Immunoglobulin heavy constant gamma 3 OS=	5	2	2	2	3.3	3.3	3.3	49.328	449	449;330;377;326;327	0	2.4228	331020000	3				254	465;1353	True;True	478;1385;1386	609;1792;1793	622;1852;1853	622;1852	60		254
P02545	P02545	21	21	21	Prelamin-A/C;Lamin-A/C	LMNA	sp|P02545|LMNA_HUMAN Prelamin-A/C OS=Homo sapiens OX=9606 GN=LMNA PE=1 SV=1	1	21	21	21	43.7	43.7	43.7	74.139	664	664	0	241.61	731900000	24				255	286;605;651;1634;3490;3947;4393;4461;4522;4834;5190;5200;5231;5712;6077;6885;7375;7393;7713;8112;8113	True;True;True;True;True;True;True;True;True;True;True;True;True;True;True;True;True;True;True;True;True	296;621;668;1672;3570;4035;4488;4557;4618;4936;5301;5311;5343;5837;6215;7053;7567;7585;7919;8335;8336	376;790;852;2184;4727;5304;5923;5924;6014;6086;6503;6504;6999;7000;7013;7069;7070;7699;8206;9370;10072;10092;10566;10567;11121;11122;11123	386;805;873;2264;4912;5508;6141;6142;6236;6311;6749;6750;7269;7270;7283;7341;7342;7988;8530;9748;10496;10517;11015;11016;11595;11596;11597	386;805;873;2264;4912;5508;6142;6236;6311;6749;7270;7283;7342;7988;8530;9748;10496;10517;11015;11595;11596
P02786	P02786	10	10	10	Transferrin receptor protein 1;Transferrin receptor protein 1, serum form	TFRC	sp|P02786|TFR1_HUMAN Transferrin receptor protein 1 OS=Homo sapiens OX=9606 GN=TFRC PE=1 SV=2	1	10	10	10	17.6	17.6	17.6	84.87	760	760	0	21.789	156640000	11				256	2695;3382;3745;4416;4455;5367;5490;7255;8670;9178	True;True;True;True;True;True;True;True;True;True	2756;3461;3830;4511;4551;5480;5604;7440;8905;9418	3583;4587;5049;5952;6008;7239;7401;9911;11852;12490	3726;4768;5242;6171;6230;7515;7682;7683;10326;12350;13002	3726;4768;5242;6171;6230;7515;7683;10326;12350;13002
P04075	P04075	1	1	1	Fructose-bisphosphate aldolase A	ALDOA	sp|P04075|ALDOA_HUMAN Fructose-bisphosphate aldolase A OS=Homo sapiens OX=9606 GN=ALDOA PE=1 SV=2	1	1	1	1	5.5	5.5	5.5	39.42	364	364	0	7.4356	12297000	1				257	3576	TRUE	3656	4832	5017	5017
P04156	P04156	2	2	2	Major prion protein	PRNP	sp|P04156|PRIO_HUMAN Major prion protein OS=Homo sapiens OX=9606 GN=PRNP PE=1 SV=1	1	2	2	2	15	15	15	27.661	253	253	0	7.7024	39743000	2				258	3291;8798	True;True	3366;9032	4437;12004	4616;12502	4616;12502
P04259	P04259	20	3	0	Keratin, type II cytoskeletal 6B	KRT6B	sp|P04259|K2C6B_HUMAN Keratin, type II cytoskeletal 6B OS=Homo sapiens OX=9606 GN=KRT6B PE=1 SV=5	1	20	3	0	26.6	7.8	0	60.066	564	564	0	8.2464	81139000	4				259	643;2100;2129;2130;2305;3905;4206;4394;4916;5911;5918;5919;5936;5937;6275;6442;7754;9017;9018;9019	False;False;False;False;False;True;False;False;False;True;False;False;False;False;True;False;False;False;False;False	660;2148;2149;2179;2180;2358;3993;4297;4489;5022;6045;6052;6053;6070;6071;6418;6588;7962;9255;9256;9257	842;2792;2793;2794;2795;2796;2797;2835;2836;2837;2838;3064;3065;5253;5648;5925;6661;7959;7969;7970;7971;7972;7973;7974;7975;7976;7977;7998;7999;8526;8773;10616;10617;12292;12293;12294;12295;12296	863;2902;2903;2904;2905;2906;2907;2952;2953;2954;2955;2956;3191;3192;5451;5855;6143;6922;8259;8269;8270;8271;8272;8273;8274;8275;8276;8277;8298;8299;8880;8881;9135;11066;11067;12797;12798;12799;12800;12801;12802	863;2905;2954;2956;3191;5451;5855;6143;6922;8259;8270;8273;8298;8299;8881;9135;11066;12797;12798;12801	14		452
P04264;CON__P04264	P04264;CON__P04264	45;43	41;39	31;29	Keratin, type II cytoskeletal 1	KRT1	sp|P04264|K2C1_HUMAN Keratin, type II cytoskeletal 1 OS=Homo sapiens OX=9606 GN=KRT1 PE=1 SV=6;	2	45	41	31	61.5	59.9	52.3	66.038	644	644;644	0	323.31	13033000000	75			+	260	145;146;642;1369;1433;2307;2308;2441;2721;3020;3046;3522;4269;4391;4515;5082;5083;5256;5257;5728;5912;5913;5918;5919;6000;6369;6370;6895;6971;6980;6981;7011;7012;7080;7081;7112;7638;7639;7738;7800;7801;8894;9017;9018;9019	True;True;True;True;True;True;True;True;True;True;True;True;True;True;True;True;True;True;True;True;True;True;False;False;True;True;True;True;True;True;True;True;True;True;True;True;True;True;True;True;True;True;False;False;True	148;149;659;1404;1469;2360;2361;2498;2783;3091;3117;3602;4361;4486;4611;5191;5192;5368;5369;5854;5855;6046;6047;6052;6053;6136;6137;6514;6515;7065;7145;7154;7155;7186;7187;7256;7257;7291;7843;7844;7945;8009;8010;9130;9255;9256;9257	190;191;841;1820;1897;3067;3068;3247;3248;3249;3250;3617;3618;4066;4098;4099;4100;4763;5738;5739;5920;5921;6078;6862;6863;6864;7100;7101;7102;7719;7720;7721;7722;7960;7961;7962;7969;7970;7971;7972;7973;7974;7975;7976;7977;8091;8092;8093;8664;8665;8666;9386;9509;9518;9519;9520;9521;9576;9577;9578;9579;9580;9581;9582;9679;9680;9681;9722;10463;10464;10465;10466;10595;10678;10679;10680;12125;12292;12…	193;194;862;1885;1965;3194;3195;3383;3384;3385;3386;3387;3763;3764;4231;4265;4266;4267;4948;5947;5948;6137;6138;6139;6303;7125;7126;7127;7128;7372;7373;7374;8009;8010;8011;8012;8013;8014;8260;8261;8262;8269;8270;8271;8272;8273;8274;8275;8276;8277;8401;8402;8403;9021;9022;9023;9765;9901;9910;9911;9912;9913;9968;9969;9970;9971;9972;9973;9974;10080;10081;10082;10083;10124;10906;10907;10908;10909;109…	193;194;862;1885;1965;3194;3195;3384;3763;4231;4267;4948;5947;6139;6303;7125;7127;7373;7374;8010;8260;8262;8270;8273;8403;9021;9023;9765;9901;9910;9913;9970;9974;10080;10083;10124;10907;10910;11044;11134;11137;12625;12797;12798;12801	61;62;63		259;262;493
P04350	P04350	19	1	0	Tubulin beta-4A chain	TUBB4A	sp|P04350|TBB4A_HUMAN Tubulin beta-4A chain OS=Homo sapiens OX=9606 GN=TUBB4A PE=1 SV=2	1	19	1	0	63.5	4.1	0	49.585	444	444	0	16.443	30636000	2				261	498;790;1729;2376;2509;2772;3783;3897;4185;4459;4744;5405;5719;5997;6079;6907;7470;8674;9156	False;False;False;False;False;True;False;False;False;False;False;False;False;False;False;False;False;False;False	511;808;1767;2431;2567;2839;3870;3871;3985;4276;4555;4845;4846;5518;5519;5844;6133;6217;7077;7663;8909;9395	647;1050;2303;2304;3160;3161;3340;3341;3342;3343;3344;3345;3720;3721;5101;5102;5103;5241;5622;5623;6012;6398;6399;6400;7286;7287;7288;7289;7708;8088;8208;8209;9400;9401;10192;10193;11856;11857;12464	660;1078;2386;2387;3291;3292;3478;3479;3480;3481;3482;3483;3874;3875;5294;5295;5296;5439;5829;5830;6234;6640;6641;6642;7562;7563;7564;7565;7997;8398;8532;8533;9779;9780;10621;10622;12354;12355;12975	660;1078;2386;3292;3479;3875;5296;5439;5830;6234;6642;7564;7997;8398;8532;9780;10621;12354;12975	64;65;66		164;233;267
P04406;O14556	P04406	13;1	13;1	13;1	Glyceraldehyde-3-phosphate dehydrogenase	GAPDH	sp|P04406|G3P_HUMAN Glyceraldehyde-3-phosphate dehydrogenase OS=Homo sapiens OX=9606 GN=GAPDH PE=1 SV=3	2	13	13	13	56.1	56.1	56.1	36.053	335	335;408	0	96.79	631010000	20				262	2556;2790;3668;5364;5437;5438;6721;8348;8351;8615;8793;8794;8900	True;True;True;True;True;True;True;True;True;True;True;True;True	2614;2857;3749;5477;5551;5552;6882;8577;8580;8849;9027;9028;9136	3401;3745;3746;3747;4946;7236;7329;7330;7331;9166;11435;11436;11437;11442;11784;11785;11999;12000;12133;12134	3539;3900;3901;3902;5137;7512;7605;7606;7607;9536;11921;11922;11923;11924;11929;12281;12282;12497;12498;12633;12634	3539;3900;5137;7512;7605;7606;9536;11922;11929;12281;12497;12498;12633
P30455;P30447;P30443;P16188;P13746;P05534;P04439;Q29940;P30685;P30498;P30495;P30493;P30492;P30491;P30490;P30484;P30464;P18465;P18464;P10319;Q95365;Q29836;Q29718;Q04826;P30488;P30487;P30485;P30483;P30481;P30480;P30479;P30475;P30466;P30462;P30461;P30460;P18463;P03989;P01889;P01893;P30512;P30459;P30457;P30456;P30453;P30450;P18462;P16190;P16189;P10316;P10314;P01892;P01891;Q29960;P30510;P30508;P30504;…	P30455;P30447;P30443;P16188;P13746;P05534;P04439;Q29940;P30685;P30498;P30495;P30493;P30492;P30491;P30490;P30484;P30464;P18465;P18464;P10319;Q95365;Q29836;Q29718;Q04826;P30488;P30487;P30485;P30483;P30481;P30480;P30479;P30475;P30466;P30462;P30461;P30460;P18463;P03989;P01889;P01893;P30512;P30459;P30457;P30456;P30453;P30450;P18462;P16190;P16189;P10316;P10314;P01892;P01891;Q29960;P30510;P30508;P30504	4;4;4;4;4;4;4;3;3;3;3;3;3;3;3;3;3;3;3;3;2;2;2;2;2;2;2;2;2;2;2;2;2;2;2;2;2;2;2;2;2;2;2;2;2;2;2;2;2;2;2;2;2;2;2;2;2;1;1;1;1;1;1;1;1;1;1;1;1;1	4;4;4;4;4;4;4;3;3;3;3;3;3;3;3;3;3;3;3;3;2;2;2;2;2;2;2;2;2;2;2;2;2;2;2;2;2;2;2;2;2;2;2;2;2;2;2;2;2;2;2;2;2;2;2;2;2;1;1;1;1;1;1;1;1;1;1;1;1;1	4;4;4;4;4;4;4;3;3;3;3;3;3;3;3;3;3;3;3;3;2;2;2;2;2;2;2;2;2;2;2;2;2;2;2;2;2;2;2;2;2;2;2;2;2;2;2;2;2;2;2;2;2;2;2;2;2;1;1;1;1;1;1;1;1;1;1;1;1;1	HLA class I histocompatibility antigen, A-36 alpha chain;HLA class I histocompatibility antigen, A-23 alpha chain;HLA class I histocompatibility antigen, A-1 alpha chain;HLA class I histocompatibility antigen, A-30 alpha chain;HLA class I histocompatibility antigen, A-11 alpha chain;HLA class I histocompatibility antigen, A-24 alpha chain;HLA class I histocompatibility antigen, A-3 alpha chain;HL…	HLA-A;HLA-B;HLA-H;HLA-C	sp|P30455|1A36_HUMAN HLA class I histocompatibility antigen, A-36 alpha chain OS=Homo sapiens OX=9606 GN=HLA-A PE=1 SV=1;sp|P30447|1A23_HUMAN HLA class I histocompatibility antigen, A-23 alpha chain OS=Homo sapiens OX=9606 GN=HLA-A PE=1 SV=1;sp|P30443|1A01	70	4	4	4	16.4	16.4	16.4	40.933	365	365;365;365;365;365;365;365;362;362;362;362;362;362;362;362;362;362;362;362;362;362;362;362;362;362;362;362;362;362;362;362;362;362;362;362;362;362;362;362;362;365;365;365;365;365;365;365;365;365;365;365;365;365;366;366;366;366;338;358;362;362;365;366;366;366;366;366;366;366;372	0	4.8786	26599000	4				263	2258;7636;8880;9234	True;True;True;True	2310;7841;9115;9476	3010;10460;12108;12559	3136;10903;12608;13074	3136;10903;12608;13074
P04632	P04632	2	2	2	Calpain small subunit 1	CAPNS1	sp|P04632|CPNS1_HUMAN Calpain small subunit 1 OS=Homo sapiens OX=9606 GN=CAPNS1 PE=1 SV=1	1	2	2	2	12.3	12.3	12.3	28.315	268	268	0	2.2579	12887000	2				264	3726;5601	True;True	3810;5717	5024;7544	5216;7827	5216;7827
P04792	P04792	6	6	6	Heat shock protein beta-1	HSPB1	sp|P04792|HSPB1_HUMAN Heat shock protein beta-1 OS=Homo sapiens OX=9606 GN=HSPB1 PE=1 SV=2	1	6	6	6	54.6	54.6	54.6	22.782	205	205	0	64.871	425890000	7				265	4348;4452;4595;5130;6209;8698	True;True;True;True;True;True	4442;4548;4694;5240;6351;8933	5865;6005;6198;6919;8387;8388;11887;11888	6079;6227;6431;7184;8719;8720;12385;12386	6079;6227;6431;7184;8719;12386
P04843	P04843	7	7	7	Dolichyl-diphosphooligosaccharide--protein glycosyltransferase subunit 1	RPN1	sp|P04843|RPN1_HUMAN Dolichyl-diphosphooligosaccharide--protein glycosyltransferase subunit 1 OS=Homo sapiens OX=9606 GN=RPN1 PE=1 SV=1	1	7	7	7	14.2	14.2	14.2	68.569	607	607	0	13.33	78302000	5				266	495;736;2379;3477;6817;8057;8717	True;True;True;True;True;True;True	508;754;2434;3557;6983;8280;8952	643;976;3165;4714;9288;11052;11909	656;1002;3296;4899;9660;11524;12407	656;1002;3296;4899;9660;11524;12407
P04844	P04844	12	12	12	Dolichyl-diphosphooligosaccharide--protein glycosyltransferase subunit 2	RPN2	sp|P04844|RPN2_HUMAN Dolichyl-diphosphooligosaccharide--protein glycosyltransferase subunit 2 OS=Homo sapiens OX=9606 GN=RPN2 PE=1 SV=3	1	12	12	12	30.3	30.3	30.3	69.283	631	631	0	71.974	263690000	15				267	674;1547;1601;4233;5062;5238;5293;5828;6977;7615;7890;9087	True;True;True;True;True;True;True;True;True;True;True;True	691;1584;1639;4324;5171;5350;5406;5961;7151;7817;8105;9326	879;2045;2147;5684;6840;7078;7079;7149;7150;7851;7852;9515;10407;10801;12386	900;2119;2226;5892;7102;7350;7351;7425;7426;8144;8145;9907;10848;11259;12896	900;2119;2226;5892;7102;7350;7426;8145;9907;10848;11259;12896
P04899;P63096;P11488;P19087;P09471;A8MTJ3;P38405;P63092;Q5JWF2	P04899;P63096	4;2;1;1;1;1;1;1;1	4;2;1;1;1;1;1;1;1	2;0;0;0;0;0;0;0;0	Guanine nucleotide-binding protein G(i) subunit alpha-2;Guanine nucleotide-binding protein G(i) subunit alpha-1	GNAI2;GNAI1	sp|P04899|GNAI2_HUMAN Guanine nucleotide-binding protein G(i) subunit alpha-2 OS=Homo sapiens OX=9606 GN=GNAI2 PE=1 SV=3;sp|P63096|GNAI1_HUMAN Guanine nucleotide-binding protein G(i) subunit alpha-1 OS=Homo sapiens OX=9606 GN=GNAI1 PE=1 SV=2	9	4	4	2	15.2	15.2	8.5	40.45	355	355;354;350;354;354;354;381;394;1037	0	19.693	60701000	4				268	517;824;1735;4975	True;True;True;True	531;844;1773;5082	673;1101;2311;2312;6738	688;1131;2394;2395;7000	688;1131;2395;7000
Q99878;Q96KK5;Q9BTM1;Q16777;Q93077;Q7L7L0;Q6FI13;P20671;P0C0S8;P04908;Q71UI9;P0C0S5	Q99878;Q96KK5;Q9BTM1;Q16777;Q93077;Q7L7L0;Q6FI13;P20671;P0C0S8;P04908;Q71UI9;P0C0S5	2;2;2;2;2;2;2;2;2;2;1;1	2;2;2;2;2;2;2;2;2;2;1;1	1;1;1;1;1;1;1;1;1;1;0;0	Histone H2A type 1-J;Histone H2A type 1-H;Histone H2A.J;Histone H2A type 2-C;Histone H2A type 1-C;Histone H2A type 3;Histone H2A type 2-A;Histone H2A type 1-D;Histone H2A type 1;Histone H2A type 1-B/E;Histone H2A.V;Histone H2A.Z	HIST1H2AJ;HIST1H2AH;H2AFJ;HIST2H2AC;HIST1H2AC;HIST3H2A;HIST2H2AA3;HIST1H2AD;HIST1H2AG;HIST1H2AB;H2AFV;H2AFZ	sp|Q99878|H2A1J_HUMAN Histone H2A type 1-J OS=Homo sapiens OX=9606 GN=HIST1H2AJ PE=1 SV=3;sp|Q96KK5|H2A1H_HUMAN Histone H2A type 1-H OS=Homo sapiens OX=9606 GN=HIST1H2AH PE=1 SV=3;sp|Q9BTM1|H2AJ_HUMAN Histone H2A.J OS=Homo sapiens OX=9606 GN=H2AFJ PE=1 SV=	12	2	2	1	21.9	21.9	14.8	13.936	128	128;128;129;129;130;130;130;130;130;130;128;128	0	7.8365	120090000	3				269	276;8746	True;True	286;8980	366;11942;11943	376;12440;12441	376;12440
P05023;P13637;P50993;Q13733	P05023;P13637	11;6;3;1	11;6;3;1	11;6;3;1	Sodium/potassium-transporting ATPase subunit alpha-1;Sodium/potassium-transporting ATPase subunit alpha-3	ATP1A1;ATP1A3	sp|P05023|AT1A1_HUMAN Sodium/potassium-transporting ATPase subunit alpha-1 OS=Homo sapiens OX=9606 GN=ATP1A1 PE=1 SV=1;sp|P13637|AT1A3_HUMAN Sodium/potassium-transporting ATPase subunit alpha-3 OS=Homo sapiens OX=9606 GN=ATP1A3 PE=1 SV=3	4	11	11	11	15.7	15.7	15.7	112.89	1023	1023;1013;1020;1029	0	77.936	308540000	12				270	119;773;1050;1149;3088;4054;5095;5730;5876;5940;6325	True;True;True;True;True;True;True;True;True;True;True	120;791;1073;1173;3159;4142;5204;5857;6010;6075;6470	149;1028;1396;1520;4155;5439;5440;6878;7724;7918;8004;8599	152;1055;1441;1566;4325;5645;5646;7143;8016;8216;8304;8955	152;1055;1441;1566;4325;5646;7143;8016;8216;8304;8955
P05109	P05109	2	2	2	Protein S100-A8;Protein S100-A8, N-terminally processed	S100A8	sp|P05109|S10A8_HUMAN Protein S100-A8 OS=Homo sapiens OX=9606 GN=S100A8 PE=1 SV=1	1	2	2	2	23.7	23.7	23.7	10.834	93	93	0	9.6387	38439000	2				271	463;4937	True;True	476;5044	607;6689	620;6950	620;6950
P05141;Q9H0C2	P05141	14;3	6;0	6;0	ADP/ATP translocase 2;ADP/ATP translocase 2, N-terminally processed	SLC25A5	sp|P05141|ADT2_HUMAN ADP/ATP translocase 2 OS=Homo sapiens OX=9606 GN=SLC25A5 PE=1 SV=7	2	14	6	6	43	19.5	19.5	32.852	298	298;315	0	39.425	544360000	9				272	87;1008;1920;2576;2845;2919;3054;4148;4981;5685;6354;7469;7486;9041	True;True;False;False;False;False;True;True;False;False;True;False;True;False	88;1031;1962;2636;2912;2989;3125;4238;5088;5808;6499;7662;7679;9280	113;114;1348;2558;3430;3822;3941;4115;5573;5574;6745;6746;7661;8640;8641;10191;10215;12329;12330;12331	116;117;1391;1392;2663;2664;3568;3977;4103;4283;5780;5781;7007;7008;7949;8997;8998;10620;10646;12838;12839;12840	116;1391;2663;3568;3977;4103;4283;5781;7007;7949;8998;10620;10646;12838
P05198	P05198	13	13	13	Eukaryotic translation initiation factor 2 subunit 1	EIF2S1	sp|P05198|IF2A_HUMAN Eukaryotic translation initiation factor 2 subunit 1 OS=Homo sapiens OX=9606 GN=EIF2S1 PE=1 SV=3	1	13	13	13	50.5	50.5	50.5	36.112	315	315	0	70.401	324190000	12				273	116;1877;1878;3084;3168;3169;3378;3806;6674;7532;8704;8848;9256	True;True;True;True;True;True;True;True;True;True;True;True;True	117;1918;1919;3155;3239;3240;3457;3894;6831;7729;8939;9083;9498	146;2498;2499;4151;4255;4256;4572;4573;5131;9099;10286;11895;12066;12584	149;2594;2595;4321;4429;4430;4752;4753;5325;9467;10723;12393;12566;13099	149;2594;2595;4321;4429;4430;4752;5325;9467;10723;12393;12566;13099
P05362	P05362	1	1	1	Intercellular adhesion molecule 1	ICAM1	sp|P05362|ICAM1_HUMAN Intercellular adhesion molecule 1 OS=Homo sapiens OX=9606 GN=ICAM1 PE=1 SV=2	1	1	1	1	2.6	2.6	2.6	57.825	532	532	0.00079239	1.438	4532300	1				274	702	TRUE	719	924	949	949
P05386	P05386	3	3	3	60S acidic ribosomal protein P1	RPLP1	sp|P05386|RLA1_HUMAN 60S acidic ribosomal protein P1 OS=Homo sapiens OX=9606 GN=RPLP1 PE=1 SV=1	1	3	3	3	74.6	74.6	74.6	11.514	114	114	0	39.789	506430000	8				275	35;391;701	True;True;True	36;404;718	41;42;518;519;520;923	41;42;43;530;531;532;533;948	41;532;948
P05387	P05387	6	6	6	60S acidic ribosomal protein P2	RPLP2	sp|P05387|RLA2_HUMAN 60S acidic ribosomal protein P2 OS=Homo sapiens OX=9606 GN=RPLP2 PE=1 SV=1	1	6	6	6	70.4	70.4	70.4	11.665	115	115	0	116.15	898000000	10				276	3707;3708;4168;4441;5881;9247	True;True;True;True;True;True	3790;3791;4259;4537;6015;9489	5000;5001;5002;5598;5599;5989;5990;5991;7924;12572;12573	5191;5192;5193;5805;5806;6208;6209;6210;8223;13087;13088	5191;5193;5805;6209;8223;13088
P05388;Q8NHW5	P05388;Q8NHW5	12;7	12;7	12;7	60S acidic ribosomal protein P0;60S acidic ribosomal protein P0-like	RPLP0;RPLP0P6	sp|P05388|RLA0_HUMAN 60S acidic ribosomal protein P0 OS=Homo sapiens OX=9606 GN=RPLP0 PE=1 SV=1;sp|Q8NHW5|RLA0L_HUMAN 60S acidic ribosomal protein P0-like OS=Homo sapiens OX=9606 GN=RPLP0P6 PE=5 SV=1	2	12	12	12	52.7	52.7	52.7	34.273	317	317;317	0	99.664	1495300000	16				277	232;251;867;1540;1541;2303;2763;2928;3064;4996;6106;8412	True;True;True;True;True;True;True;True;True;True;True;True	240;260;888;1577;1578;2356;2830;2998;3135;5105;6245;8643	303;304;330;331;1156;2036;2037;3062;3709;3952;4128;4129;6764;8252;11536;11537	309;310;337;338;1187;2110;2111;3189;3863;4114;4296;4297;7026;8577;12029;12030	310;337;1187;2110;2111;3189;3863;4114;4296;7026;8577;12029
P05455	P05455	2	2	2	Lupus La protein	SSB	sp|P05455|LA_HUMAN Lupus La protein OS=Homo sapiens OX=9606 GN=SSB PE=1 SV=2	1	2	2	2	7.1	7.1	7.1	46.836	408	408	0	4.2099	10910000	2				278	3466;4489	True;True	3546;4585	4698;6046	4883;6271	4883;6271
P05556	P05556	2	2	2	Integrin beta-1	ITGB1	sp|P05556|ITB1_HUMAN Integrin beta-1 OS=Homo sapiens OX=9606 GN=ITGB1 PE=1 SV=2	1	2	2	2	3.9	3.9	3.9	88.414	798	798	0	2.8814	19509000	2				279	5270;5276	True;True	5383;5389	7118;7129	7390;7391;7405	7390;7405
P05783;CON__H-INV:HIT000015463;CON__Q497I4	P05783	47;3;2	47;3;2	30;2;0	Keratin, type I cytoskeletal 18	KRT18	sp|P05783|K1C18_HUMAN Keratin, type I cytoskeletal 18 OS=Homo sapiens OX=9606 GN=KRT18 PE=1 SV=2	3	47	47	30	85.6	85.6	65.1	48.057	430	430;295;455	0	323.31	187730000000	368				280	610;640;680;1410;1577;1578;1582;2016;2732;2733;2876;3632;3770;3878;4001;4236;4315;4352;4445;4525;4908;5202;5203;5204;5867;6061;6245;6264;6505;6506;6642;6715;7033;7034;7044;7045;7315;8013;8328;8395;8396;8404;8839;8979;9032;9265;9266	True;True;True;True;True;True;True;True;True;True;True;True;True;True;True;True;True;True;True;True;True;True;True;True;True;True;True;True;True;True;True;True;True;True;True;True;True;True;True;True;True;True;True;True;True;True;True	626;657;697;1445;1615;1616;1620;2060;2061;2795;2796;2797;2798;2799;2944;3712;3855;3856;3966;4089;4327;4409;4446;4541;4621;5013;5014;5313;5314;5315;5316;6000;6199;6387;6407;6652;6653;6794;6795;6875;6876;7209;7210;7220;7221;7506;8235;8236;8557;8625;8626;8634;8635;9073;9215;9216;9270;9271;9507;9508	797;798;799;835;836;837;838;898;899;900;1864;1865;1866;2082;2083;2084;2085;2086;2087;2088;2089;2090;2091;2092;2093;2094;2095;2096;2097;2098;2099;2100;2101;2102;2103;2104;2105;2106;2107;2108;2109;2110;2111;2112;2113;2114;2115;2116;2117;2121;2122;2682;2683;2684;2685;2686;3643;3644;3645;3646;3647;3648;3649;3650;3651;3652;3653;3654;3655;3656;3657;3658;3659;3660;3661;3662;3663;3664;3863;3864;3865;3866…	812;813;814;851;852;853;854;855;856;923;924;925;1930;1931;1932;2156;2157;2158;2159;2160;2161;2162;2163;2164;2165;2166;2167;2168;2169;2170;2171;2172;2173;2174;2175;2176;2177;2178;2179;2180;2181;2182;2183;2184;2185;2186;2187;2188;2189;2190;2191;2192;2193;2194;2195;2199;2200;2788;2789;2790;2791;2792;3792;3793;3794;3795;3796;3797;3798;3799;3800;3801;3802;3803;3804;3805;3806;3807;3808;3809;3810;3811;3…	813;853;923;1930;2159;2193;2199;2789;3803;3815;4020;5090;5274;5416;5580;5896;6021;6087;6215;6315;6901;7285;7299;7308;8202;8486;8785;8860;9226;9230;9418;9529;10016;10017;10033;10036;10416;11465;11893;11989;11996;12013;12550;12739;12825;13147;13152	21;22;23;67;68;69;70;71;72		58;74;84;174;213;249;313;335;402
P06396;CON__Q3SX14	P06396;CON__Q3SX14	2;1	2;1	2;1	Gelsolin	GSN	sp|P06396|GELS_HUMAN Gelsolin OS=Homo sapiens OX=9606 GN=GSN PE=1 SV=1;	2	2	2	2	4.5	4.5	4.5	85.696	782	782;781	0	9.6124	17914000	3			+	281	2077;8325	True;True	2124;8554	2765;11402;11403	2874;11888;11889	2874;11888
P06454	P06454	1	1	1	Prothymosin alpha;Prothymosin alpha, N-terminally processed;Thymosin alpha-1	PTMA	sp|P06454|PTMA_HUMAN Prothymosin alpha OS=Homo sapiens OX=9606 GN=PTMA PE=1 SV=2	1	1	1	1	12.6	12.6	12.6	12.203	111	111	0	11.172	9869600	1				282	6783	TRUE	6945	9238	9610	9610
P06493	P06493	2	2	2	Cyclin-dependent kinase 1	CDK1	sp|P06493|CDK1_HUMAN Cyclin-dependent kinase 1 OS=Homo sapiens OX=9606 GN=CDK1 PE=1 SV=3	1	2	2	2	12.1	12.1	12.1	34.095	297	297	0	4.6456	8230300	2				283	428;3882	True;True	441;3970	566;5223	579;5421	579;5421
P06576	P06576	9	9	9	ATP synthase subunit beta, mitochondrial	ATP5B	sp|P06576|ATPB_HUMAN ATP synthase subunit beta, mitochondrial OS=Homo sapiens OX=9606 GN=ATP5F1B PE=1 SV=3	1	9	9	9	25.7	25.7	25.7	56.559	529	529	0	40.625	154290000	9				284	312;330;1659;2334;2469;3784;5444;7996;8092	True;True;True;True;True;True;True;True;True	323;341;1697;2387;2526;3872;5558;8216;8315	409;432;2209;3101;3280;5104;7338;10959;11098	419;442;2290;3228;3417;5297;7614;11425;11571	419;442;2290;3228;3417;5297;7614;11425;11571
P06702	P06702	1	1	1	Protein S100-A9	S100A9	sp|P06702|S10A9_HUMAN Protein S100-A9 OS=Homo sapiens OX=9606 GN=S100A9 PE=1 SV=1	1	1	1	1	13.2	13.2	13.2	13.242	114	114	0.0022288	0.91887	8994100	1				285	5883	TRUE	6017	7926	8225	8225
P06730	P06730	4	4	4	Eukaryotic translation initiation factor 4E	EIF4E	sp|P06730|IF4E_HUMAN Eukaryotic translation initiation factor 4E OS=Homo sapiens OX=9606 GN=EIF4E PE=1 SV=2	1	4	4	4	30.9	30.9	30.9	25.097	217	217	0	24.089	172670000	6				286	744;3426;3992;8917	True;True;True;True	762;3506;4080;9153	989;990;4653;5363;12155	1015;1016;1017;4835;5567;12655	1016;4835;5567;12655
P06733;P13929;P09104	P06733	10;1;1	10;1;1	10;1;1	Alpha-enolase	ENO1	sp|P06733|ENOA_HUMAN Alpha-enolase OS=Homo sapiens OX=9606 GN=ENO1 PE=1 SV=2	3	10	10	10	39.2	39.2	39.2	47.168	434	434;434;434	0	89.124	202570000	12				287	85;954;1432;2924;3234;4402;5068;8567;8809;9112	True;True;True;True;True;True;True;True;True;True	86;977;1468;2994;3307;4497;5177;8801;9043;9351	111;1276;1895;1896;3946;4350;5935;5936;6847;11727;12019;12413	114;1314;1963;1964;4108;4526;6153;6154;7109;12222;12517;12924	114;1314;1963;4108;4526;6153;7109;12222;12517;12924
P06746	P06746	2	2	2	DNA polymerase beta	POLB	sp|P06746|DPOLB_HUMAN DNA polymerase beta OS=Homo sapiens OX=9606 GN=POLB PE=1 SV=3	1	2	2	2	8.7	8.7	8.7	38.177	335	335	0.0022659	1.0036	9467500	2				288	4064;7712	True;True	4152;7918	5452;10565	5658;11014	5658;11014
P06748	P06748	10	10	10	Nucleophosmin	NPM1	sp|P06748|NPM_HUMAN Nucleophosmin OS=Homo sapiens OX=9606 GN=NPM1 PE=1 SV=2	1	10	10	10	49.3	49.3	49.3	32.575	294	294	0	179.29	1013400000	17				289	123;874;985;2269;5026;5570;5742;8015;8160;8752	True;True;True;True;True;True;True;True;True;True	124;895;1008;2321;5135;5685;5871;5872;8238;8385;8986	154;155;156;1163;1316;1317;3021;6798;7504;7742;7743;7744;7745;10998;10999;11184;11185;11949	157;158;159;1195;1355;1356;3147;7060;7787;8034;8035;8036;8037;11468;11469;11662;11663;12447	157;1195;1355;3147;7060;7787;8037;11468;11662;12447	73	14	81	125
P06753	P06753	4	4	2	Tropomyosin alpha-3 chain	TPM3	sp|P06753|TPM3_HUMAN Tropomyosin alpha-3 chain OS=Homo sapiens OX=9606 GN=TPM3 PE=1 SV=2	1	4	4	2	7.7	7.7	3.9	32.95	285	285	0	8.1314	88586000	4				290	3860;4225;5433;6623	True;True;True;True	3948;4316;5547;6775	5193;5672;5673;7325;9022	5389;5879;5880;7601;9389	5389;5880;7601;9389
Q8N257;Q16778;P33778;P23527;P06899;Q6DRA6;Q6DN03	Q8N257;Q16778;P33778;P23527;P06899	3;3;3;3;3;1;1	1;1;1;1;1;1;1	1;1;1;1;1;1;1	Histone H2B type 3-B;Histone H2B type 2-E;Histone H2B type 1-B;Histone H2B type 1-O;Histone H2B type 1-J	HIST3H2BB;HIST2H2BE;HIST1H2BB;HIST1H2BO;HIST1H2BJ	sp|Q8N257|H2B3B_HUMAN Histone H2B type 3-B OS=Homo sapiens OX=9606 GN=HIST3H2BB PE=1 SV=3;sp|Q16778|H2B2E_HUMAN Histone H2B type 2-E OS=Homo sapiens OX=9606 GN=HIST2H2BE PE=1 SV=3;sp|P33778|H2B1B_HUMAN Histone H2B type 1-B OS=Homo sapiens OX=9606 GN=HIST1H	7	3	1	1	26.2	7.1	7.1	13.908	126	126;126;126;126;126;164;193	0.00080451	1.5128	22954000	1				291	516;1999;4977	False;True;False	529;530;2043;5084	671;672;2663;6740	685;686;687;2769;7002	686;2769;7002	59		60
P07195	P07195	4	4	4	L-lactate dehydrogenase B chain	LDHB	sp|P07195|LDHB_HUMAN L-lactate dehydrogenase B chain OS=Homo sapiens OX=9606 GN=LDHB PE=1 SV=2	1	4	4	4	10.2	10.2	10.2	36.638	334	334	0	6.5612	52713000	4				292	2264;4019;7001;7002	True;True;True;True	2316;4107;7176;7177	3016;5395;9560;9561	3142;5600;9952;9953	3142;5600;9952;9953
P07237	P07237	2	2	2	Protein disulfide-isomerase	P4HB	sp|P07237|PDIA1_HUMAN Protein disulfide-isomerase OS=Homo sapiens OX=9606 GN=P4HB PE=1 SV=3	1	2	2	2	7.5	7.5	7.5	57.116	508	508	0	5.8812	7359600	2				293	3710;7613	True;True	3793;7815	5004;10405	5195;10846	5195;10846
P07339	P07339	1	1	1	Cathepsin D;Cathepsin D light chain;Cathepsin D heavy chain	CTSD	sp|P07339|CATD_HUMAN Cathepsin D OS=Homo sapiens OX=9606 GN=CTSD PE=1 SV=1	1	1	1	1	4.1	4.1	4.1	44.552	412	412	0	4.1642	7584600	1				294	3932	TRUE	4020	5284	5488	5488
P07355;A6NMY6	P07355;A6NMY6	21;16	21;16	21;16	Annexin A2;Putative annexin A2-like protein	ANXA2;ANXA2P2	sp|P07355|ANXA2_HUMAN Annexin A2 OS=Homo sapiens OX=9606 GN=ANXA2 PE=1 SV=2;sp|A6NMY6|AXA2L_HUMAN Putative annexin A2-like protein OS=Homo sapiens OX=9606 GN=ANXA2P2 PE=5 SV=2	2	21	21	21	65.5	65.5	65.5	38.604	339	339;339	0	186.96	2779400000	32				295	457;847;938;1093;2597;2850;3080;5079;5296;6280;6560;6760;7117;7351;7422;7423;7500;7501;7691;7821;8910	True;True;True;True;True;True;True;True;True;True;True;True;True;True;True;True;True;True;True;True;True	470;868;961;1116;2657;2918;3151;5188;5409;6424;6710;6922;7296;7542;7614;7615;7694;7695;7896;8031;9146	600;1132;1133;1258;1446;3456;3829;3830;3831;4146;4147;6859;7154;7155;7156;8540;8935;8936;9210;9211;9729;10040;10127;10128;10238;10239;10240;10241;10532;10706;12146	613;1163;1164;1296;1491;3594;3595;3984;3985;3986;4315;4316;4317;7122;7430;7431;7432;8896;9301;9302;9581;9582;10132;10463;10554;10555;10671;10672;10673;10674;10981;11163;12646	613;1163;1296;1491;3594;3984;4315;7122;7431;8896;9301;9582;10132;10463;10554;10555;10671;10674;10981;11163;12646
P07384	P07384	13	13	13	Calpain-1 catalytic subunit	CAPN1	sp|P07384|CAN1_HUMAN Calpain-1 catalytic subunit OS=Homo sapiens OX=9606 GN=CAPN1 PE=1 SV=1	1	13	13	13	23.8	23.8	23.8	81.889	714	714	0	34.662	173770000	10				296	575;982;1973;4065;4552;5497;5569;6147;6386;6691;6751;7710;9135	True;True;True;True;True;True;True;True;True;True;True;True;True	591;1005;2016;4153;4649;5611;5684;6287;6531;6850;6913;7916;9374	751;1312;2630;5453;6138;7408;7503;8308;8687;9124;9201;10563;12441	766;1351;2736;5659;6368;7690;7786;8638;9044;9494;9572;11012;12952	766;1351;2736;5659;6368;7690;7786;8638;9044;9494;9572;11012;12952
P07437;A6NNZ2;CON__ENSEMBL:ENSBTAP00000025008;Q9H4B7	P07437	21;7;4;4	5;0;0;0	4;0;0;0	Tubulin beta chain	TUBB	sp|P07437|TBB5_HUMAN Tubulin beta chain OS=Homo sapiens OX=9606 GN=TUBB PE=1 SV=2	4	21	5	4	70.3	19.4	16	49.67	444	444;444;536;451	0	44.501	934450000	10				297	356;500;2047;2376;2508;2773;3783;3877;3897;3936;4185;4459;4744;5405;5537;5997;6079;6907;7470;8674;9156	True;True;False;False;True;False;False;False;False;True;False;False;False;False;True;False;False;False;False;False;False	367;368;513;2093;2094;2431;2566;2840;3870;3871;3965;3985;4024;4276;4555;4845;4846;5518;5519;5652;6133;6217;7077;7663;8909;9395	469;470;471;650;2727;2728;3160;3161;3336;3337;3338;3339;3722;3723;5101;5102;5103;5216;5217;5241;5290;5622;5623;6012;6398;6399;6400;7286;7287;7288;7289;7460;7461;8088;8208;8209;9400;9401;10192;10193;11856;11857;12464	480;481;482;663;2836;2837;3291;3292;3474;3475;3476;3477;3876;3877;3878;5294;5295;5296;5414;5415;5439;5494;5829;5830;6234;6640;6641;6642;7562;7563;7564;7565;7743;7744;8398;8532;8533;9779;9780;10621;10622;12354;12355;12975	481;663;2837;3292;3475;3878;5296;5415;5439;5494;5830;6234;6642;7564;7743;8398;8532;9780;10621;12354;12975	64;65;66;74;75		73;164;233;267;330
P07737	P07737	1	1	1	Profilin-1	PFN1	sp|P07737|PROF1_HUMAN Profilin-1 OS=Homo sapiens OX=9606 GN=PFN1 PE=1 SV=2	1	1	1	1	11.4	11.4	11.4	15.054	140	140	0	2.2064	0	1				298	7584	TRUE	7786	10366	10805	10805
P07741	P07741	2	2	2	Adenine phosphoribosyltransferase	APRT	sp|P07741|APT_HUMAN Adenine phosphoribosyltransferase OS=Homo sapiens OX=9606 GN=APRT PE=1 SV=2	1	2	2	2	14.4	14.4	14.4	19.608	180	180	0.0082192	0.55412	13866000	2				299	4410;6871	True;True	4505;7038	5945;9354	6164;9732	6164;9732
P07814	P07814	47	47	47	Bifunctional glutamate/proline--tRNA ligase;Glutamate--tRNA ligase;Proline--tRNA ligase	EPRS	sp|P07814|SYEP_HUMAN Bifunctional glutamate/proline--tRNA ligase OS=Homo sapiens OX=9606 GN=EPRS PE=1 SV=5	1	47	47	47	44.2	44.2	44.2	170.59	1512	1512	0	323.31	2869400000	69				300	52;724;1275;1291;1490;1754;1958;2064;2065;2094;2154;2382;2908;3032;3183;3796;4008;4009;4099;4223;4262;4730;5034;5098;5323;5407;5594;5966;6024;6043;6311;6731;6780;7008;7055;7056;7115;7395;7540;7616;7637;7642;8058;8108;8117;8896;9180	True;True;True;True;True;True;True;True;True;True;True;True;True;True;True;True;True;True;True;True;True;True;True;True;True;True;True;True;True;True;True;True;True;True;True;True;True;True;True;True;True;True;True;True;True;True;True	53;742;1306;1322;1527;1793;2001;2111;2112;2141;2142;2204;2437;2978;3103;3254;3884;4096;4097;4189;4314;4354;4831;5143;5207;5436;5521;5709;6101;6161;6180;6455;6892;6942;7183;7231;7232;7294;7587;7738;7818;7842;7847;8281;8331;8340;9132;9420	73;74;959;960;1690;1709;1710;1969;1970;2343;2613;2614;2749;2750;2751;2785;2786;2868;2869;3168;3169;3170;3926;4079;4276;4277;5119;5383;5384;5503;5504;5670;5728;6381;6382;6807;6881;7187;7188;7291;7534;8041;8119;8120;8144;8581;9178;9235;9571;9572;9648;9649;9650;9651;9725;9726;10094;10297;10298;10408;10461;10462;10469;10470;11053;11117;11127;12127;12492;12493	74;75;985;986;1747;1768;1769;2041;2042;2427;2719;2720;2858;2859;2860;2895;2896;2988;2989;3299;3300;3301;3302;4087;4246;4450;4451;5312;5588;5589;5710;5711;5877;5937;6622;6623;7069;7146;7463;7464;7567;7817;8346;8430;8431;8456;8457;8937;9548;9607;9963;9964;10049;10050;10051;10052;10127;10128;10129;10519;10734;10735;10849;10904;10905;10913;10914;11525;11590;11601;12627;13004;13005	74;986;1747;1768;2041;2427;2719;2858;2860;2895;2989;3299;4087;4246;4450;5312;5588;5589;5711;5877;5937;6622;7069;7146;7463;7567;7817;8346;8430;8456;8937;9548;9607;9963;10049;10052;10128;10519;10734;10849;10905;10914;11525;11590;11601;12627;13004		15		886
P07900;Q14568;Q58FG0	P07900	22;5;2	22;5;2	12;1;1	Heat shock protein HSP 90-alpha	HSP90AA1	sp|P07900|HS90A_HUMAN Heat shock protein HSP 90-alpha OS=Homo sapiens OX=9606 GN=HSP90AA1 PE=1 SV=5	3	22	22	12	35.8	35.8	21.2	84.659	732	732;343;334	0	153	1117600000	28				301	128;450;1546;1803;2188;2517;3114;3199;3217;3258;3294;3347;4152;5275;5483;6019;6563;7103;8233;8354;9092;9276	True;True;True;True;True;True;True;True;True;True;True;True;True;True;True;True;True;True;True;True;True;True	131;463;1583;1842;2238;2575;3185;3271;3289;3332;3369;3424;4242;5388;5597;6156;6713;7282;8460;8583;9331;9518	170;593;2044;2401;2911;3353;4184;4300;4301;4328;4385;4386;4441;4442;4523;4524;5578;7128;7391;8114;8940;9711;9712;11281;11446;11447;12391;12654	173;606;2118;2487;3034;3491;4354;4474;4475;4502;4503;4561;4562;4620;4621;4702;4703;5785;7404;7671;8425;9306;10113;10114;11762;11933;11934;12901;13178	173;606;2118;2487;3034;3491;4354;4475;4502;4562;4621;4703;5785;7404;7671;8425;9306;10114;11762;11933;12901;13178
P07910;P0DMR1;O60812;B7ZW38;B2RXH8	P07910	3;1;1;1;1	3;1;1;1;1	3;1;1;1;1	Heterogeneous nuclear ribonucleoproteins C1/C2	HNRNPC	sp|P07910|HNRPC_HUMAN Heterogeneous nuclear ribonucleoproteins C1/C2 OS=Homo sapiens OX=9606 GN=HNRNPC PE=1 SV=4	5	3	3	3	12.7	12.7	12.7	33.67	306	306;293;293;293;293	0	27.209	106340000	3				302	2645;5635;8232	True;True;True	2705;5757;8459	3516;7601;11280	3656;7887;11761	3656;7887;11761
P08174	P08174	4	4	4	Complement decay-accelerating factor	CD55	sp|P08174|DAF_HUMAN Complement decay-accelerating factor OS=Homo sapiens OX=9606 GN=CD55 PE=1 SV=4	1	4	4	4	16.8	16.8	16.8	41.4	381	381	0	6.2304	47514000	4				303	1734;6465;7889;8950	True;True;True;True	1772;6611;8104;9186	2310;8802;10800;12192	2393;9164;11258;12694	2393;9164;11258;12694
P08183	P08183	1	1	1	Multidrug resistance protein 1	ABCB1	sp|P08183|MDR1_HUMAN ATP-dependent translocase ABCB1 OS=Homo sapiens OX=9606 GN=ABCB1 PE=1 SV=3	1	1	1	1	1	1	1	141.48	1280	1280	0.0022108	0.86572	3759200	0				304	254	TRUE	263	335	342	342
P08195	P08195	4	4	4	4F2 cell-surface antigen heavy chain	SLC3A2	sp|P08195|4F2_HUMAN 4F2 cell-surface antigen heavy chain OS=Homo sapiens OX=9606 GN=SLC3A2 PE=1 SV=3	1	4	4	4	8.9	8.9	8.9	67.993	630	630	0	10.134	54965000	3				305	1529;2997;3573;5040	True;True;True;True	1566;3067;3653;5149	2021;4036;4829;6813	2095;4199;5014;7075	2095;4199;5014;7075
P08237	P08237	2	1	1	ATP-dependent 6-phosphofructokinase, muscle type	PFKM	sp|P08237|PFKAM_HUMAN ATP-dependent 6-phosphofructokinase, muscle type OS=Homo sapiens OX=9606 GN=PFKM PE=1 SV=2	1	2	1	1	2.7	1.5	1.5	85.182	780	780	0	4.0155	8308600	0				306	1198;7583	True;False	1224;7785	1585;10365	1635;10804	1635;10804
P08238;Q58FF7;Q58FG1	P08238	21;6;1	11;2;0	11;2;0	Heat shock protein HSP 90-beta	HSP90AB1	sp|P08238|HS90B_HUMAN Heat shock protein HSP 90-beta OS=Homo sapiens OX=9606 GN=HSP90AB1 PE=1 SV=4	3	21	11	11	37.6	22.8	22.8	83.263	724	724;597;418	0	146.69	470230000	16				307	128;449;1546;2188;2656;3114;3199;3257;3294;3478;4154;4693;5275;5479;6020;7103;7781;8234;8354;9085;9092	False;True;False;False;True;False;False;True;False;True;True;True;False;True;True;False;True;True;False;True;False	131;462;1583;2238;2716;3185;3271;3331;3369;3558;4244;4794;5388;5593;6157;7282;7990;8461;8583;9324;9331	170;592;2044;2911;3531;3532;4184;4300;4301;4383;4384;4441;4442;4715;5580;6342;7128;7384;7385;8115;9711;9712;10656;11282;11283;11446;11447;12383;12384;12391	173;605;2118;3034;3671;3672;4354;4474;4475;4559;4560;4620;4621;4900;5787;6580;7404;7664;7665;8426;10113;10114;11112;11763;11764;11933;11934;12893;12894;12901	173;605;2118;3034;3671;4354;4475;4560;4621;4900;5787;6580;7404;7664;8426;10114;11112;11763;11933;12894;12901
P08240	P08240	5	5	5	Signal recognition particle receptor subunit alpha	SRPR	sp|P08240|SRPRA_HUMAN Signal recognition particle receptor subunit alpha OS=Homo sapiens OX=9606 GN=SRPRA PE=1 SV=2	1	5	5	5	9.6	9.6	9.6	69.81	638	638	0	56.727	54304000	5				308	4777;5658;6042;6262;8538	True;True;True;True;True	4879;5780;6179;6405;8772	6438;7628;8143;8505;11693	6682;7914;8455;8857;12188	6682;7914;8455;8857;12188
P08243	P08243	3	3	3	Asparagine synthetase [glutamine-hydrolyzing]	ASNS	sp|P08243|ASNS_HUMAN Asparagine synthetase [glutamine-hydrolyzing] OS=Homo sapiens OX=9606 GN=ASNS PE=1 SV=4	1	3	3	3	8.2	8.2	8.2	64.369	561	561	0	13.061	27431000	3				309	3572;4460;5711	True;True;True	3652;4556;5836	4828;6013;7698	5013;6235;7987	5013;6235;7987
P08572	P08572	1	1	1	Collagen alpha-2(IV) chain;Canstatin	COL4A2	sp|P08572|CO4A2_HUMAN Collagen alpha-2(IV) chain OS=Homo sapiens OX=9606 GN=COL4A2 PE=1 SV=4	1	1	1	1	1.5	1.5	1.5	167.55	1712	1712	0.0036075	0.76454	3394800	1				310	7427	TRUE	7619	10132	10559	10559
P08579	P08579	2	2	2	U2 small nuclear ribonucleoprotein B	SNRPB2	sp|P08579|RU2B_HUMAN U2 small nuclear ribonucleoprotein B OS=Homo sapiens OX=9606 GN=SNRPB2 PE=1 SV=1	1	2	2	2	15.6	15.6	15.6	25.486	225	225	0	9.5485	18938000	2				311	3177;5549	True;True	3248;5664	4266;7478	4440;7761	4440;7761
P08621	P08621	4	4	4	U1 small nuclear ribonucleoprotein 70 kDa	SNRNP70	sp|P08621|RU17_HUMAN U1 small nuclear ribonucleoprotein 70 kDa OS=Homo sapiens OX=9606 GN=SNRNP70 PE=1 SV=2	1	4	4	4	11.7	11.7	11.7	51.556	437	437	0	2.5766	27163000	4				312	1262;3128;3230;7856	True;True;True;True	1293;3199;3302;8067	1675;4201;4343;10753	1732;4372;4519;11211	1732;4372;4519;11211
P08648	P08648	4	4	4	Integrin alpha-5;Integrin alpha-5 heavy chain;Integrin alpha-5 light chain	ITGA5	sp|P08648|ITA5_HUMAN Integrin alpha-5 OS=Homo sapiens OX=9606 GN=ITGA5 PE=1 SV=2	1	4	4	4	6.8	6.8	6.8	114.54	1049	1049	0	29.597	61428000	4				313	314;4935;6232;8719	True;True;True;True	325;5042;6374;8954	411;6687;8422;11911	421;6948;8755;12409	421;6948;8755;12409
P08708	P08708	8	8	8	40S ribosomal protein S17	RPS17	sp|P08708|RS17_HUMAN 40S ribosomal protein S17 OS=Homo sapiens OX=9606 GN=RPS17 PE=1 SV=2	1	8	8	8	53.3	53.3	53.3	15.55	135	135	0	108.32	1165100000	14				314	1254;1255;3422;4890;6570;6716;8125;8126	True;True;True;True;True;True;True;True	1285;1286;3502;4993;4994;4995;6720;6877;8348;8349	1663;1664;1665;1666;4647;4648;6602;6603;6604;6605;6606;8948;8949;9160;9161;11137;11138	1719;1720;1721;1722;1723;4828;4829;4830;6859;6860;6861;6862;6863;9314;9315;9530;9531;11611;11612	1719;1723;4828;6861;9314;9530;11611;11612	76;77		105;126
P08754	P08754	4	2	2	Guanine nucleotide-binding protein G(k) subunit alpha	GNAI3	sp|P08754|GNAI3_HUMAN Guanine nucleotide-binding protein G(i) subunit alpha OS=Homo sapiens OX=9606 GN=GNAI3 PE=1 SV=3	1	4	2	2	13.8	7.1	7.1	40.532	354	354	0	3.5805	27764000	2				315	1037;1735;3923;4975	True;False;True;False	1060;1773;4011;5082	1379;2311;2312;5273;6738	1424;2394;2395;5472;7000	1424;2395;5472;7000
P08865	P08865	14	14	14	40S ribosomal protein SA	RPSA	sp|P08865|RSSA_HUMAN 40S ribosomal protein SA OS=Homo sapiens OX=9606 GN=RPSA PE=1 SV=4	1	14	14	14	62.4	62.4	62.4	32.854	295	295	0	125.23	921220000	18				316	114;370;1258;1683;1684;2104;2286;2468;2550;4282;5054;6883;6884;9248	True;True;True;True;True;True;True;True;True;True;True;True;True;True	115;383;1289;1721;1722;2153;2338;2525;2608;4374;5163;7051;7052;9490	143;144;490;1670;2245;2246;2247;2248;2801;3041;3042;3279;3394;5758;5759;6829;9368;9369;12574	146;147;501;1727;2326;2327;2328;2329;2911;3167;3168;3416;3532;5967;5968;7091;9746;9747;13089	147;501;1727;2326;2329;2911;3167;3416;3532;5968;7091;9746;9747;13089
P09012	P09012	2	2	2	U1 small nuclear ribonucleoprotein A	SNRPA	sp|P09012|SNRPA_HUMAN U1 small nuclear ribonucleoprotein A OS=Homo sapiens OX=9606 GN=SNRPA PE=1 SV=3	1	2	2	2	13.1	13.1	13.1	31.279	282	282	0	31.167	88758000	3				317	794;3176	True;True	813;3247	1057;4264;4265	1085;4438;4439	1085;4438
P09110	P09110	1	1	1	3-ketoacyl-CoA thiolase, peroxisomal	ACAA1	sp|P09110|THIK_HUMAN 3-ketoacyl-CoA thiolase, peroxisomal OS=Homo sapiens OX=9606 GN=ACAA1 PE=1 SV=2	1	1	1	1	4.5	4.5	4.5	44.292	424	424	0	1.7856	2778700	1				318	3440	TRUE	3520	4671	4856	4856
P09211	P09211	2	2	2	Glutathione S-transferase P	GSTP1	sp|P09211|GSTP1_HUMAN Glutathione S-transferase P OS=Homo sapiens OX=9606 GN=GSTP1 PE=1 SV=2	1	2	2	2	18.6	18.6	18.6	23.356	210	210	0	7.4153	12881000	2				319	468;1287	True;True	481;1318	612;1705	625;1764	625;1764
P09493	P09493	3	1	1	Tropomyosin alpha-1 chain	TPM1	sp|P09493|TPM1_HUMAN Tropomyosin alpha-1 chain OS=Homo sapiens OX=9606 GN=TPM1 PE=1 SV=2	1	3	1	1	7.7	3.9	3.9	32.708	284	284	0.0022091	0.86457	29959000	2				320	3860;4226;6623	False;True;False	3948;4317;6775	5193;5674;5675;9022	5389;5881;5882;9389	5389;5882;9389
P09543	P09543	2	2	2	2,3-cyclic-nucleotide 3-phosphodiesterase	CNP	sp|P09543|CN37_HUMAN 2,3-cyclic-nucleotide 3-phosphodiesterase OS=Homo sapiens OX=9606 GN=CNP PE=1 SV=2	1	2	2	2	9.5	9.5	9.5	47.578	421	421	0	12.829	24561000	2				321	1141;8199	True;True	1165;8425	1511;11233	1557;11711	1557;11711
P09622	P09622	2	2	2	Dihydrolipoyl dehydrogenase, mitochondrial	DLD	sp|P09622|DLDH_HUMAN Dihydrolipoyl dehydrogenase, mitochondrial OS=Homo sapiens OX=9606 GN=DLD PE=1 SV=2	1	2	2	2	10.2	10.2	10.2	54.177	509	509	0	8.7153	8691400	2				322	3831;8447	True;True	3919;8678	5161;11578	5357;12072	5357;12072
P09651;Q32P51	P09651;Q32P51	16;10	16;10	16;10	Heterogeneous nuclear ribonucleoprotein A1;Heterogeneous nuclear ribonucleoprotein A1, N-terminally processed;Heterogeneous nuclear ribonucleoprotein A1-like 2	HNRNPA1;HNRNPA1L2	sp|P09651|ROA1_HUMAN Heterogeneous nuclear ribonucleoprotein A1 OS=Homo sapiens OX=9606 GN=HNRNPA1 PE=1 SV=5;sp|Q32P51|RA1L2_HUMAN Heterogeneous nuclear ribonucleoprotein A1-like 2 OS=Homo sapiens OX=9606 GN=HNRNPA1L2 PE=2 SV=2	2	16	16	16	45.4	45.4	45.4	38.746	372	372;320	0	176.87	2087700000	31				323	1423;1551;1554;2646;2675;2676;3537;4201;4611;6044;6604;6846;6926;7259;7260;9086	True;True;True;True;True;True;True;True;True;True;True;True;True;True;True;True	1459;1588;1591;2706;2736;2737;3617;4292;4710;6181;6755;7012;7098;7099;7445;7446;9325	1883;2050;2051;2052;2055;3517;3518;3555;3556;3557;3558;3559;3560;4780;5642;6215;6216;8145;8991;8992;9324;9325;9448;9449;9450;9922;9923;9924;12385	1950;2124;2125;2126;2129;3657;3658;3697;3698;3699;3700;3701;3702;3703;4965;5849;6448;6449;6450;8458;9358;9359;9699;9700;9836;9837;9838;10339;10340;10341;12895	1950;2125;2129;3657;3697;3702;4965;5849;6449;8458;9358;9699;9838;10339;10341;12895	78		46
P09661	P09661	1	1	1	U2 small nuclear ribonucleoprotein A	SNRPA1	sp|P09661|RU2A_HUMAN U2 small nuclear ribonucleoprotein A OS=Homo sapiens OX=9606 GN=SNRPA1 PE=1 SV=2	1	1	1	1	6.7	6.7	6.7	28.415	255	255	0	1.9891	11150000	0				324	5344	TRUE	5457	7212	7488	7488
P09874	P09874	39	39	39	Poly [ADP-ribose] polymerase 1	PARP1	sp|P09874|PARP1_HUMAN Poly [ADP-ribose] polymerase 1 OS=Homo sapiens OX=9606 GN=PARP1 PE=1 SV=4	1	39	39	39	51.7	51.7	51.7	113.08	1014	1014	0	223.42	2420500000	62				325	526;623;624;673;1580;2522;2527;2688;2689;2706;2744;2813;3308;3436;3555;4126;4127;4570;5206;5527;5639;5749;6062;6094;6367;6485;6627;6698;6761;6786;6992;7088;7724;7942;8060;8246;8589;8838;8968	True;True;True;True;True;True;True;True;True;True;True;True;True;True;True;True;True;True;True;True;True;True;True;True;True;True;True;True;True;True;True;True;True;True;True;True;True;True;True	540;640;641;690;1618;2580;2585;2749;2750;2767;2810;2880;3383;3516;3635;4216;4217;4667;5318;5641;5761;5880;6200;6233;6512;6632;6779;6857;6923;6948;7166;7266;7930;8161;8283;8473;8823;9072;9204	686;814;815;816;878;2119;3358;3363;3364;3573;3574;3575;3576;3596;3597;3677;3678;3782;4465;4466;4665;4802;4803;4804;5541;5542;5543;5544;5545;6157;6158;6159;7039;7444;7605;7753;7754;8186;8187;8236;8237;8238;8660;8661;8662;8831;9028;9133;9212;9243;9543;9690;10578;10876;10877;11055;11056;11299;11300;11751;11752;12050;12213;12214	701;830;831;832;899;2197;3496;3501;3502;3716;3717;3718;3719;3740;3741;3829;3830;3937;4644;4645;4849;4987;4988;4989;5748;5749;5750;5751;5752;6387;6388;6389;7311;7726;7891;8046;8047;8506;8507;8560;8561;8562;8563;9017;9018;9019;9194;9395;9503;9583;9615;9935;10092;11027;11334;11335;11527;11528;11781;11782;12247;12248;12549;12716;12717	701;830;832;899;2197;3496;3502;3716;3718;3740;3830;3937;4644;4849;4988;5748;5750;6389;7311;7726;7891;8046;8506;8562;9017;9194;9395;9503;9583;9615;9935;10092;11027;11334;11528;11781;12247;12549;12717
P09884	P09884	6	6	6	DNA polymerase alpha catalytic subunit	POLA1	sp|P09884|DPOLA_HUMAN DNA polymerase alpha catalytic subunit OS=Homo sapiens OX=9606 GN=POLA1 PE=1 SV=2	1	6	6	6	6.6	6.6	6.6	165.91	1462	1462	0	6.2774	43244000	6				326	1041;2514;6286;7739;8177;9100	True;True;True;True;True;True	1064;2572;6430;7946;8402;9339	1384;3350;8546;10596;11206;12400	1429;3488;8902;11045;11684;12911	1429;3488;8902;11045;11684;12911
P0CG12	P0CG12	1	1	1	Chromosome transmission fidelity protein 8 homolog isoform 2	CHTF8	sp|P0CG12|DERPC_HUMAN Decreased expression in renal and prostate cancer protein OS=Homo sapiens OX=9606 GN=DERPC PE=1 SV=1	1	1	1	1	3.4	3.4	3.4	51.391	524	524	0.0082023	0.54524	9251800	1				327	6186	TRUE	6327	8358	8689	8689
P0DMV9;P0DMV8	P0DMV9;P0DMV8	19;19	18;18	9;9	Heat shock 70 kDa protein 1B;Heat shock 70 kDa protein 1A	HSPA1B;HSPA1A	sp|P0DMV9|HS71B_HUMAN Heat shock 70 kDa protein 1B OS=Homo sapiens OX=9606 GN=HSPA1B PE=1 SV=1;sp|P0DMV8|HS71A_HUMAN Heat shock 70 kDa protein 1A OS=Homo sapiens OX=9606 GN=HSPA1A PE=1 SV=1	2	19	18	9	44.1	42.1	23.7	70.051	641	641;641	0	81.418	632790000	24				328	12;249;612;709;899;930;1247;1691;1792;2177;3394;3659;5005;5457;5648;5781;6963;7948;9115	True;True;True;True;True;True;True;True;True;True;True;True;True;True;True;True;True;False;True	12;258;628;726;922;953;1277;1729;1831;2227;3474;3739;5114;5571;5770;5914;7136;8167;9354	12;328;801;802;933;1198;1246;1652;2257;2389;2897;4610;4611;4932;4933;6773;7355;7356;7357;7615;7793;9496;9497;10884;12416	12;335;816;817;958;1231;1284;1708;2338;2475;3020;4791;4792;5123;5124;7035;7632;7633;7634;7901;8086;9887;9888;11342;12927	12;335;817;958;1231;1284;1708;2338;2475;3020;4792;5123;7035;7632;7901;8086;9888;11342;12927
P0DN76;Q01081;Q8WU68	P0DN76;Q01081;Q8WU68	5;5;3	5;5;3	5;5;3	Splicing factor U2AF 35 kDa subunit;Splicing factor U2AF 26 kDa subunit	U2AF1;U2AF1L4	sp|P0DN76|U2AF5_HUMAN Splicing factor U2AF 35 kDa subunit-like protein OS=Homo sapiens OX=9606 GN=U2AF1L5 PE=1 SV=1;sp|Q01081|U2AF1_HUMAN Splicing factor U2AF 35 kDa subunit OS=Homo sapiens OX=9606 GN=U2AF1 PE=1 SV=3;sp|Q8WU68|U2AF4_HUMAN Splicing factor U	3	5	5	5	22.5	22.5	22.5	27.872	240	240;240;220	0	13.588	121880000	5				329	205;206;1145;2715;8897	True;True;True;True;True	212;213;1169;2776;9133	271;272;1515;3607;12128;12129	275;276;1561;3751;12628;12629	275;276;1561;3751;12629
P0DOX8;P01709;P01706;B9A064	P0DOX8;P01709;P01706	3;2;2;1	2;1;1;1	2;1;1;1	Ig lambda chain V-II region MGC;Ig lambda chain V-II region BOH		sp|P0DOX8|IGL1_HUMAN Immunoglobulin lambda-1 light chain OS=Homo sapiens OX=9606 PE=1 SV=1;sp|P01709|LV208_HUMAN Immunoglobulin lambda variable 2-8 OS=Homo sapiens OX=9606 GN=IGLV2-8 PE=1 SV=2;sp|P01706|LV211_HUMAN Immunoglobulin lambda variable 2-11 OS=Ho	4	3	2	2	7.4	7.4	7.4	22.83	216	216;118;119;214	0.00080064	1.47	44495000	1				330	6228;6690;8780	False;True;True	6370;6849;9014	8418;9123;11983	8751;9493;12481	8751;9493;12481
P10412;P16402;P22492;Q02539	P10412;P16402	5;4;2;2	1;0;0;0	1;0;0;0	Histone H1.4;Histone H1.3	HIST1H1E;HIST1H1D	sp|P10412|H14_HUMAN Histone H1.4 OS=Homo sapiens OX=9606 GN=HIST1H1E PE=1 SV=2;sp|P16402|H13_HUMAN Histone H1.3 OS=Homo sapiens OX=9606 GN=HIST1H1D PE=1 SV=2	4	5	1	1	22.4	7.3	7.3	21.865	219	219;221;207;215	0.0015267	1.1045	0	1				331	386;669;4061;6848;6918	False;False;False;True;False	399;686;4149;7014;7090	512;513;873;5449;9327;9436	524;525;894;5655;9702;9822	524;894;5655;9702;9822
P10586	P10586	5	5	5	Receptor-type tyrosine-protein phosphatase F	PTPRF	sp|P10586|PTPRF_HUMAN Receptor-type tyrosine-protein phosphatase F OS=Homo sapiens OX=9606 GN=PTPRF PE=1 SV=2	1	5	5	5	5.7	5.7	5.7	212.88	1907	1907	0	4.1789	42566000	4				332	3300;4768;6178;7823;8581	True;True;True;True;True	3375;4870;6319;8033;8815	4449;6428;8348;10708;11742	4628;6670;8679;11165;12238	4628;6670;8679;11165;12238
P10588	P10588	1	1	1	Nuclear receptor subfamily 2 group F member 6	NR2F6	sp|P10588|NR2F6_HUMAN Nuclear receptor subfamily 2 group F member 6 OS=Homo sapiens OX=9606 GN=NR2F6 PE=1 SV=2	1	1	1	1	4.7	4.7	4.7	42.979	404	404	1	-2	0	0	+			333	7254	TRUE	7439	9910	10325	10325		127		68
P10809	P10809	16	16	16	60 kDa heat shock protein, mitochondrial	HSPD1	sp|P10809|CH60_HUMAN 60 kDa heat shock protein, mitochondrial OS=Homo sapiens OX=9606 GN=HSPD1 PE=1 SV=2	1	16	16	16	41.2	41.2	41.2	61.054	573	573	0	106.73	523590000	19				334	79;460;1709;3093;3586;3850;3924;4175;5465;5778;6494;7454;7750;7984;8277;8723	True;True;True;True;True;True;True;True;True;True;True;True;True;True;True;True	80;473;1747;3164;3666;3938;4012;4266;5579;5911;6641;7646;7957;8204;8504;8958	104;603;604;2278;4160;4161;4844;5182;5274;5275;5608;7366;7367;7789;8842;10169;10170;10608;10941;11336;11915	105;616;617;2360;4330;4331;5029;5378;5473;5474;5475;5815;7643;7644;8082;9205;10597;10598;11058;11405;11820;12413	105;617;2360;4331;5029;5378;5475;5815;7644;8082;9205;10598;11058;11405;11820;12413	79		190
P10909	P10909	2	2	2	Clusterin;Clusterin beta chain;Clusterin alpha chain	CLU	sp|P10909|CLUS_HUMAN Clusterin OS=Homo sapiens OX=9606 GN=CLU PE=1 SV=1	1	2	2	2	7.6	7.6	7.6	52.494	449	449	0	1.9605	67973000	3				335	1776;8773	True;True	1815;9007	2370;11972;11973	2454;12470;12471	2454;12470
P11021;REV__Q9NXD2	P11021	23;1	22;1	22;1	78 kDa glucose-regulated protein	HSPA5	sp|P11021|BIP_HUMAN Endoplasmic reticulum chaperone BiP OS=Homo sapiens OX=9606 GN=HSPA5 PE=1 SV=2	2	23	22	22	39.8	39.8	39.8	72.332	654	654;777	0	245.06	3279300000	41				336	379;1242;1787;2179;3520;3542;3657;3658;3868;3968;4178;4283;4290;5505;5649;5820;6050;6795;7207;7563;7697;8435;8745	True;True;True;True;True;True;False;True;True;True;True;True;True;True;True;True;True;True;True;True;True;True;True	392;1272;1826;2229;3600;3622;3737;3738;3956;4056;4269;4375;4383;5619;5771;5953;6187;6957;7391;7764;7902;8666;8979	502;503;1645;1646;2382;2383;2384;2899;4760;4761;4785;4786;4927;4928;4929;4930;4931;5202;5332;5612;5613;5760;5761;5774;5775;7416;7417;7616;7842;8153;9253;9254;9850;10337;10338;10542;10543;10544;11564;11940;11941	513;514;1700;1701;1702;2466;2467;2468;2469;3022;4945;4946;4970;4971;5118;5119;5120;5121;5122;5398;5536;5819;5820;5969;5970;5971;5985;5986;7698;7699;7902;8135;8468;9625;9626;10262;10776;10777;10991;10992;10993;12058;12438;12439	514;1702;2466;3022;4945;4971;5120;5121;5398;5536;5820;5970;5986;7698;7902;8135;8468;9625;10262;10776;10992;12058;12438
P11047	P11047	2	2	2	Laminin subunit gamma-1	LAMC1	sp|P11047|LAMC1_HUMAN Laminin subunit gamma-1 OS=Homo sapiens OX=9606 GN=LAMC1 PE=1 SV=3	1	2	2	2	1.7	1.7	1.7	177.6	1609	1609	0	6.6072	21348000	1				337	6095;6752	True;True	6234;6914	8239;9202	8564;9573	8564;9573
P11142;P54652	P11142	32;8	32;8	29;5	Heat shock cognate 71 kDa protein	HSPA8	sp|P11142|HSP7C_HUMAN Heat shock cognate 71 kDa protein OS=Homo sapiens OX=9606 GN=HSPA8 PE=1 SV=1	2	32	32	29	57	57	51.1	70.897	646	646;639	0	323.31	8512900000	52				338	645;889;890;929;1246;1690;2150;2178;2186;2935;3392;3393;3657;3705;5004;5518;5647;5758;5759;6057;6058;6074;6521;6586;6880;6964;7208;7307;7948;8021;8131;8655	True;True;True;True;True;True;True;True;True;True;True;True;True;True;True;True;True;True;True;True;True;True;True;True;True;True;True;True;True;True;True;True	662;910;911;952;1276;1728;2200;2228;2236;3005;3471;3472;3473;3737;3788;5113;5632;5769;5890;5891;5892;6194;6195;6196;6212;6669;6736;7047;7048;7137;7392;7498;8167;8244;8354;8889	844;845;1181;1182;1183;1245;1651;2256;2862;2898;2908;3961;3962;4603;4604;4605;4606;4607;4608;4609;4927;4928;4929;4998;6772;7433;7613;7614;7765;7766;7767;7768;8161;8162;8163;8202;8886;8887;8966;9363;9364;9365;9498;9499;9851;9986;9987;10884;11005;11006;11007;11144;11830	865;866;1214;1215;1216;1283;1707;2337;2981;3021;3031;4123;4124;4784;4785;4786;4787;4788;4789;4790;5118;5119;5120;5189;7034;7715;7899;7900;8058;8059;8060;8061;8477;8478;8479;8525;9252;9253;9333;9741;9742;9743;9889;9890;9891;10263;10406;10407;11342;11475;11476;11477;11618;12327	866;1214;1216;1283;1707;2337;2981;3021;3031;4123;4784;4787;5120;5189;7034;7715;7900;8060;8061;8477;8479;8525;9252;9333;9742;9891;10263;10407;11342;11477;11618;12327	80;81;82;83		61;93;122;237
P11166	P11166	5	5	5	Solute carrier family 2, facilitated glucose transporter member 1	SLC2A1	sp|P11166|GTR1_HUMAN Solute carrier family 2, facilitated glucose transporter member 1 OS=Homo sapiens OX=9606 GN=SLC2A1 PE=1 SV=2	1	5	5	5	12	12	12	54.083	492	492	0	74.586	265280000	8				339	3049;6332;7566;7824;8749	True;True;True;True;True	3120;6477;7767;8034;8983	4108;4109;4110;8609;8610;10341;10709;11946	4276;4277;4278;8966;8967;10780;11166;12444	4278;8967;10780;11166;12444
P11172	P11172	1	1	1	Uridine 5-monophosphate synthase;Orotate phosphoribosyltransferase;Orotidine 5-phosphate decarboxylase	UMPS	sp|P11172|UMPS_HUMAN Uridine 5-monophosphate synthase OS=Homo sapiens OX=9606 GN=UMPS PE=1 SV=1	1	1	1	1	3.5	3.5	3.5	52.221	480	480	0	1.6954	3495300	1				340	50	TRUE	51	71	72	72
P11177	P11177	1	1	1	Pyruvate dehydrogenase E1 component subunit beta, mitochondrial	PDHB	sp|P11177|ODPB_HUMAN Pyruvate dehydrogenase E1 component subunit beta, mitochondrial OS=Homo sapiens OX=9606 GN=PDHB PE=1 SV=3	1	1	1	1	4.5	4.5	4.5	39.233	359	359	0	2.0551	3227000	1				341	3774	TRUE	3860	5088	5281	5281
P11182	P11182	2	2	2	Lipoamide acyltransferase component of branched-chain alpha-keto acid dehydrogenase complex, mitochondrial	DBT	sp|P11182|ODB2_HUMAN Lipoamide acyltransferase component of branched-chain alpha-keto acid dehydrogenase complex, mitochondrial OS=Homo sapiens OX=9606 GN=DBT PE=1 SV=3	1	2	2	2	6.4	6.4	6.4	53.486	482	482	0	4.968	19253000	3				342	6240;7415	True;True	6382;7607	8430;8431;10120	8763;8764;10547	8764;10547
P11387;Q969P6	P11387	13;1	13;1	13;1	DNA topoisomerase 1	TOP1	sp|P11387|TOP1_HUMAN DNA topoisomerase 1 OS=Homo sapiens OX=9606 GN=TOP1 PE=1 SV=2	2	13	13	13	20.8	20.8	20.8	90.725	765	765;601	0	25.808	339920000	11				343	160;280;755;756;854;1845;2968;3276;4195;4581;5112;6889;8966	True;True;True;True;True;True;True;True;True;True;True;True;True	165;290;773;774;875;1885;3038;3351;4286;4680;5221;7058;9202	213;370;1005;1006;1142;2460;4003;4413;5635;6182;6897;9377;9378;12211	216;380;1032;1033;1173;2556;4165;4589;5842;6414;7162;9755;9756;12714	216;380;1032;1033;1173;2556;4165;4589;5842;6414;7162;9756;12714
P11388	P11388	4	4	3	DNA topoisomerase 2-alpha	TOP2A	sp|P11388|TOP2A_HUMAN DNA topoisomerase 2-alpha OS=Homo sapiens OX=9606 GN=TOP2A PE=1 SV=3	1	4	4	3	4	4	3.1	174.38	1531	1531	0	5.8839	21016000	3				344	1537;2299;3550;3686	True;True;True;True	1574;2352;3630;3769	2031;3057;4796;4975	2105;3183;4981;5166	2105;3183;4981;5166
P11586	P11586	9	9	9	C-1-tetrahydrofolate synthase, cytoplasmic;Methylenetetrahydrofolate dehydrogenase;Methenyltetrahydrofolate cyclohydrolase;Formyltetrahydrofolate synthetase;C-1-tetrahydrofolate synthase, cytoplasmic, N-terminally processed	MTHFD1	sp|P11586|C1TC_HUMAN C-1-tetrahydrofolate synthase, cytoplasmic OS=Homo sapiens OX=9606 GN=MTHFD1 PE=1 SV=3	1	9	9	9	12.6	12.6	12.6	101.56	935	935	0	21.874	78270000	8				345	1708;2553;3099;4032;4494;7509;7511;8928;9260	True;True;True;True;True;True;True;True;True	1746;2611;3170;4120;4590;7706;7708;9164;9502	2277;3397;4168;5415;6056;10260;10262;12168;12589	2359;3535;4338;5621;6281;10695;10697;12668;13104	2359;3535;4338;5621;6281;10695;10697;12668;13104
P11940;Q9H361;Q4VXU2;Q5JQF8	P11940	28;12;4;1	28;12;4;1	20;11;2;1	Polyadenylate-binding protein 1	PABPC1	sp|P11940|PABP1_HUMAN Polyadenylate-binding protein 1 OS=Homo sapiens OX=9606 GN=PABPC1 PE=1 SV=2	4	28	28	20	56.8	56.8	40.6	70.67	636	636;631;614;200	0	323.31	10190000000	44				346	377;399;510;797;1628;2234;2433;2665;2668;3144;3952;3981;4102;4626;5690;5830;5831;5927;5928;6031;6158;6260;6704;6915;6999;7049;8141;9200	True;True;True;True;True;True;True;True;True;True;True;True;True;True;True;True;True;True;True;True;True;True;True;True;True;True;True;True	390;412;523;816;1666;2284;2490;2726;2729;3215;4040;4069;4192;4725;4726;5813;5963;5964;6061;6062;6168;6298;6403;6863;7085;7174;7225;8365;9442	499;500;529;661;662;1060;2178;2978;3237;3238;3544;3547;4221;4222;4223;5311;5312;5313;5348;5349;5507;6232;6233;6234;6235;6236;6237;7666;7854;7855;7856;7987;7988;8127;8128;8323;8503;9139;9410;9556;9557;9641;11157;11158;12520	510;511;542;674;675;676;1088;2258;3102;3372;3373;3685;3686;3689;4393;4394;4395;5515;5516;5517;5552;5553;5714;6466;6467;6468;6469;6470;6471;7954;8147;8148;8149;8287;8288;8438;8439;8653;8855;9509;9789;9948;9949;10042;11631;11632;13034	511;542;674;1088;2258;3102;3372;3685;3689;4393;5516;5552;5714;6468;7954;8147;8148;8287;8288;8439;8653;8855;9509;9789;9948;10042;11631;13034	84		573
P12004	P12004	3	3	3	Proliferating cell nuclear antigen	PCNA	sp|P12004|PCNA_HUMAN Proliferating cell nuclear antigen OS=Homo sapiens OX=9606 GN=PCNA PE=1 SV=1	1	3	3	3	21.1	21.1	21.1	28.768	261	261	0	43.03	51639000	4				347	155;1207;5063	True;True;True	159;1233;5172	207;1597;6841;6842	210;1647;7103;7104	210;1647;7103
P12235	P12235	13	4	4	ADP/ATP translocase 1	SLC25A4	sp|P12235|ADT1_HUMAN ADP/ATP translocase 1 OS=Homo sapiens OX=9606 GN=SLC25A4 PE=1 SV=4	1	13	4	4	49.3	14.1	14.1	33.064	298	298	0	4.2699	34616000	5				348	88;1009;1611;1919;2534;2576;2592;2919;4981;5685;7469;9035;9041	False;True;True;True;False;False;True;False;False;False;False;False;False	89;1032;1649;1961;2592;2636;2652;2989;5088;5808;7662;9274;9280	115;1349;2157;2557;3374;3430;3450;3941;6745;6746;7661;10191;12321;12322;12329;12330;12331	118;1393;2236;2661;2662;3512;3568;3588;4103;7007;7008;7949;10620;12829;12830;12831;12838;12839;12840	118;1393;2236;2662;3512;3568;3588;4103;7007;7949;10620;12829;12838
P12236	P12236	15	15	4	ADP/ATP translocase 3;ADP/ATP translocase 3, N-terminally processed	SLC25A6	sp|P12236|ADT3_HUMAN ADP/ATP translocase 3 OS=Homo sapiens OX=9606 GN=SLC25A6 PE=1 SV=4	1	15	15	4	53.7	53.7	12.8	32.866	298	298	0	65.085	2809800000	24				349	88;1007;1920;2534;2576;2845;2900;2901;2919;4981;5685;7469;7551;9035;9041	True;True;True;True;True;True;True;True;True;True;True;True;True;True;True	89;1030;1962;2592;2636;2912;2968;2969;2989;5088;5808;7662;7751;9274;9280	115;1347;2558;3374;3430;3822;3907;3908;3909;3910;3941;6745;6746;7661;10191;10321;12321;12322;12329;12330;12331	118;1389;1390;2663;2664;3512;3568;3977;4068;4069;4070;4071;4103;7007;7008;7949;10620;10759;12829;12830;12831;12838;12839;12840	118;1389;2663;3512;3568;3977;4068;4070;4103;7007;7949;10620;10759;12829;12838
P12268	P12268	12	12	12	Inosine-5-monophosphate dehydrogenase 2	IMPDH2	sp|P12268|IMDH2_HUMAN Inosine-5-monophosphate dehydrogenase 2 OS=Homo sapiens OX=9606 GN=IMPDH2 PE=1 SV=2	1	12	12	12	37.5	37.5	37.5	55.804	514	514	0	112.87	675570000	17				350	1081;1150;2242;2496;4343;5141;5948;6576;6593;7916;8101;8280	True;True;True;True;True;True;True;True;True;True;True;True	1104;1174;2294;2554;4437;5251;6083;6726;6743;8133;8324;8507	1430;1521;1522;2990;2991;3319;3320;5857;6933;8012;8955;8976;8977;10836;10837;11108;11342	1475;1567;1568;3116;3117;3456;3457;6070;7198;8312;9321;9343;9344;11294;11295;11581;11826	1475;1568;3116;3456;6070;7198;8312;9321;9344;11294;11581;11826
P12270	P12270	1	1	1	Nucleoprotein TPR	TPR	sp|P12270|TPR_HUMAN Nucleoprotein TPR OS=Homo sapiens OX=9606 GN=TPR PE=1 SV=3	1	1	1	1	0.4	0.4	0.4	267.29	2363	2363	0	1.6878	4446400	2				351	84	TRUE	85	110	112;113	113
P12273	P12273	2	2	2	Prolactin-inducible protein	PIP	sp|P12273|PIP_HUMAN Prolactin-inducible protein OS=Homo sapiens OX=9606 GN=PIP PE=1 SV=1	1	2	2	2	15.8	15.8	15.8	16.572	146	146	0.00080775	1.529	16867000	2				352	1801;2526	True;True	1840;2584	2398;3362	2484;3500	2484;3500
P12694	P12694	1	1	1	2-oxoisovalerate dehydrogenase subunit alpha, mitochondrial	BCKDHA	sp|P12694|ODBA_HUMAN 2-oxoisovalerate dehydrogenase subunit alpha, mitochondrial OS=Homo sapiens OX=9606 GN=BCKDHA PE=1 SV=2	1	1	1	1	5.4	5.4	5.4	50.47	445	445	0	2.626	3993000	1				353	3202	TRUE	3274	4306	4480	4480
P12956	P12956	31	31	31	X-ray repair cross-complementing protein 6	XRCC6	sp|P12956|XRCC6_HUMAN X-ray repair cross-complementing protein 6 OS=Homo sapiens OX=9606 GN=XRCC6 PE=1 SV=2	1	31	31	31	57.5	57.5	57.5	69.842	609	609	0	301.64	3332600000	52				354	514;1094;1179;1323;1347;1854;2153;2473;3669;3670;3712;3779;3873;3874;4244;4266;4722;5900;5908;5939;6359;6360;6640;6660;6806;7530;7578;7579;8217;8218;8307	True;True;True;True;True;True;True;True;True;True;True;True;True;True;True;True;True;True;True;True;True;True;True;True;True;True;True;True;True;True;True	527;1117;1205;1355;1379;1895;2203;2530;3750;3751;3796;3865;3961;3962;4335;4358;4823;6034;6042;6073;6074;6504;6505;6792;6815;6972;7727;7780;7781;8444;8445;8536	668;1447;1562;1754;1783;1784;2474;2475;2866;2867;3284;4947;4948;4949;5008;5009;5096;5210;5211;5212;5213;5701;5733;5734;6372;7945;7954;7955;7956;8001;8002;8003;8648;8649;8650;9044;9076;9077;9275;9276;10284;10357;10358;10359;11259;11260;11261;11262;11375	682;1492;1611;1814;1843;1844;2570;2571;2985;2986;2987;3421;5138;5139;5140;5200;5201;5289;5406;5407;5408;5409;5410;5411;5909;5942;5943;6613;8245;8254;8255;8256;8301;8302;8303;9005;9006;9007;9411;9444;9445;9647;9648;10720;10721;10796;10797;10798;11738;11739;11740;11741;11860	682;1492;1611;1814;1844;2571;2987;3421;5139;5140;5201;5289;5406;5411;5909;5942;6613;8245;8254;8302;9005;9007;9411;9445;9648;10720;10796;10798;11738;11740;11860	85		498
P13010	P13010	38	38	38	X-ray repair cross-complementing protein 5	XRCC5	sp|P13010|XRCC5_HUMAN X-ray repair cross-complementing protein 5 OS=Homo sapiens OX=9606 GN=XRCC5 PE=1 SV=3	1	38	38	38	65.8	65.8	65.8	82.704	732	732	0	323.31	3043100000	54				355	237;540;663;855;869;969;1143;1292;1534;1900;2034;2200;2366;3237;3270;3302;3340;3864;4070;4072;4081;4177;4316;4629;4866;5370;6528;6615;6940;7209;7211;7212;7512;7552;7721;8379;8987;9072	True;True;True;True;True;True;True;True;True;True;True;True;True;True;True;True;True;True;True;True;True;True;True;True;True;True;True;True;True;True;True;True;True;True;True;True;True;True	245;554;680;876;890;992;1167;1323;1571;1941;2079;2250;2421;3310;3344;3345;3377;3417;3952;4158;4160;4170;4268;4410;4729;4969;5483;6676;6767;7113;7393;7395;7396;7709;7752;7927;8609;9224;9311	311;701;865;1143;1158;1294;1513;1711;1712;2026;2525;2526;2527;2706;2707;2708;2923;3148;4354;4355;4356;4404;4405;4406;4451;4452;4513;5197;5198;5458;5461;5474;5475;5610;5611;5810;6241;6242;6571;6572;7242;8894;9007;9468;9852;9854;9855;9856;10263;10322;10575;11478;12251;12252;12253;12367	318;716;886;1174;1189;1333;1559;1770;1771;2100;2623;2624;2625;2814;2815;2816;3046;3279;4530;4531;4532;4580;4581;4582;4630;4631;4692;5393;5394;5664;5667;5680;5681;5817;5818;6023;6475;6476;6828;6829;7518;9260;9374;9857;10264;10266;10267;10268;10698;10760;11024;11966;12755;12756;12757;12876	318;716;886;1174;1189;1333;1559;1771;2100;2623;2814;3046;3279;4531;4581;4631;4692;5394;5664;5667;5681;5817;6023;6476;6829;7518;9260;9374;9857;10264;10266;10268;10698;10760;11024;11966;12755;12876	86		84
P13473	P13473	1	1	1	Lysosome-associated membrane glycoprotein 2	LAMP2	sp|P13473|LAMP2_HUMAN Lysosome-associated membrane glycoprotein 2 OS=Homo sapiens OX=9606 GN=LAMP2 PE=1 SV=2	1	1	1	1	2.9	2.9	2.9	44.96	410	410	0.00078678	1.3621	0	1				356	2794	TRUE	2861	3752	3907	3907
P13489	P13489	4	4	4	Ribonuclease inhibitor	RNH1	sp|P13489|RINI_HUMAN Ribonuclease inhibitor OS=Homo sapiens OX=9606 GN=RNH1 PE=1 SV=2	1	4	4	4	13.7	13.7	13.7	49.973	461	461	0	13.191	20639000	4				357	1778;1851;8563;8881	True;True;True;True	1817;1891;8797;9116	2372;2470;11722;12109	2456;2566;12217;12609	2456;2566;12217;12609
P13639	P13639	23	23	22	Elongation factor 2	EEF2	sp|P13639|EF2_HUMAN Elongation factor 2 OS=Homo sapiens OX=9606 GN=EEF2 PE=1 SV=4	1	23	23	22	41.3	41.3	40.1	95.337	858	858	0	70.11	795460000	26				358	448;647;843;887;1030;2032;2171;2513;2724;2770;2951;3102;6003;7141;7142;7309;7565;8223;8248;8554;8920;9034;9251	True;True;True;True;True;True;True;True;True;True;True;True;True;True;True;True;True;True;True;True;True;True;True	461;664;864;908;1053;2077;2221;2571;2786;2837;3021;3173;6140;7323;7324;7500;7766;8450;8475;8788;9156;9273;9493	590;591;847;848;1124;1125;1178;1371;2704;2890;2891;3349;3622;3718;3983;4172;8096;9769;9770;9989;9990;10340;11267;11303;11709;12159;12320;12577	603;604;868;869;1155;1156;1211;1416;2811;3013;3014;3487;3768;3872;4145;4342;8406;10176;10177;10409;10410;10779;11746;11785;12204;12659;12828;13092	603;868;1155;1211;1416;2811;3013;3487;3768;3872;4145;4342;8406;10176;10177;10409;10779;11746;11785;12204;12659;12828;13092
P13693	P13693	2	2	2	Translationally-controlled tumor protein	TPT1	sp|P13693|TCTP_HUMAN Translationally-controlled tumor protein OS=Homo sapiens OX=9606 GN=TPT1 PE=1 SV=1	1	2	2	2	34.9	34.9	34.9	19.595	172	172	0	5.3957	13679000	1				359	1689;7533	True;True	1727;7730	2255;10287	2336;10724	2336;10724
P13987	P13987	1	1	1	CD59 glycoprotein	CD59	sp|P13987|CD59_HUMAN CD59 glycoprotein OS=Homo sapiens OX=9606 GN=CD59 PE=1 SV=1	1	1	1	1	9.4	9.4	9.4	14.177	128	128	0.0049505	0.65711	3881300	1				360	5248	TRUE	5360	7090	7362	7362
P13995	P13995	2	2	2	Bifunctional methylenetetrahydrofolate dehydrogenase/cyclohydrolase, mitochondrial;NAD-dependent methylenetetrahydrofolate dehydrogenase;Methenyltetrahydrofolate cyclohydrolase	MTHFD2	sp|P13995|MTDC_HUMAN Bifunctional methylenetetrahydrofolate dehydrogenase/cyclohydrolase, mitochondrial OS=Homo sapiens OX=9606 GN=MTHFD2 PE=1 SV=2	1	2	2	2	12.9	12.9	12.9	37.895	350	350	0.0029112	0.80528	27950000	2				361	5103;6676	True;True	5212;6833	6887;9102	7152;9470	7152;9470
P14373	P14373	7	7	7	Zinc finger protein RFP	TRIM27	sp|P14373|TRI27_HUMAN Zinc finger protein RFP OS=Homo sapiens OX=9606 GN=TRIM27 PE=1 SV=1	1	7	7	7	18.5	18.5	18.5	58.489	513	513	0	14.358	50269000	7				362	178;1818;2103;2363;2768;4020;8956	True;True;True;True;True;True;True	184;1857;2152;2418;2835;4108;9192	236;2418;2800;3144;3715;5396;12199	239;2505;2910;3275;3869;5601;12702	239;2505;2910;3275;3869;5601;12702
P14618;P30613	P14618	15;1	15;1	15;1	Pyruvate kinase PKM	PKM	sp|P14618|KPYM_HUMAN Pyruvate kinase PKM OS=Homo sapiens OX=9606 GN=PKM PE=1 SV=4	2	15	15	15	43.1	43.1	43.1	57.936	531	531;574	0	92.302	374490000	16				363	169;273;2533;2598;2783;2784;3096;3097;4048;4150;4408;5092;6587;6994;7467	True;True;True;True;True;True;True;True;True;True;True;True;True;True;True	174;283;2591;2658;2850;2851;3167;3168;4136;4240;4503;5201;6737;7168;7660	225;361;3373;3457;3735;3736;4164;4165;5433;5576;5942;5943;6875;8967;8968;9545;10189	228;371;3511;3596;3890;3891;4334;4335;5639;5783;6161;6162;7140;9334;9335;9937;10618	228;371;3511;3596;3890;3891;4334;4335;5639;5783;6162;7140;9334;9937;10618
P14625	P14625	5	5	5	Endoplasmin	HSP90B1	sp|P14625|ENPL_HUMAN Endoplasmin OS=Homo sapiens OX=9606 GN=HSP90B1 PE=1 SV=1	1	5	5	5	9.2	9.2	9.2	92.468	803	803	0	20.448	119340000	5				364	1558;2113;2407;3113;4820	True;True;True;True;True	1595;2162;2463;3184;4922	2060;2812;3204;4183;6487	2134;2924;3338;4353;6731	2134;2924;3338;4353;6731
P63162;P14678	P63162;P14678	5;5	5;5	5;5	Small nuclear ribonucleoprotein-associated protein N;Small nuclear ribonucleoprotein-associated proteins B and B	SNRPN;SNRPB	sp|P63162|RSMN_HUMAN Small nuclear ribonucleoprotein-associated protein N OS=Homo sapiens OX=9606 GN=SNRPN PE=1 SV=1;sp|P14678|RSMB_HUMAN Small nuclear ribonucleoprotein-associated proteins B and B OS=Homo sapiens OX=9606 GN=SNRPB PE=1 SV=2	2	5	5	5	21.7	21.7	21.7	24.614	240	240;240	0	10.898	107150000	5				365	2634;3292;3553;5677;8452	True;True;True;True;True	2694;3367;3633;5800;8683	3503;4438;4439;4800;7651;11584	3643;4617;4618;4985;7939;12078	3643;4617;4985;7939;12078
P14866	P14866	12	12	11	Heterogeneous nuclear ribonucleoprotein L	HNRNPL	sp|P14866|HNRPL_HUMAN Heterogeneous nuclear ribonucleoprotein L OS=Homo sapiens OX=9606 GN=HNRNPL PE=1 SV=2	1	12	12	11	42.1	42.1	40.9	64.132	589	589	0	102.64	485380000	16				366	683;4864;5115;5808;5862;6452;6460;6993;7286;7508;8242;9068	True;True;True;True;True;True;True;True;True;True;True;True	700;4967;5224;5941;5995;6598;6606;7167;7474;7705;8469;9307	904;6569;6901;7826;7827;7893;8786;8797;9544;9955;10258;10259;11293;12362;12363	929;6826;7166;8119;8120;8188;9148;9159;9936;10373;10692;10693;10694;11774;11775;12871;12872	929;6826;7166;8119;8188;9148;9159;9936;10373;10693;11774;12872
P14868	P14868	10	10	10	Aspartate--tRNA ligase, cytoplasmic	DARS	sp|P14868|SYDC_HUMAN Aspartate--tRNA ligase, cytoplasmic OS=Homo sapiens OX=9606 GN=DARS PE=1 SV=2	1	10	10	10	28.3	28.3	28.3	57.136	501	501	0	37.81	134980000	12				367	1466;2208;3601;3666;4050;4584;6478;8249;8760;9061	True;True;True;True;True;True;True;True;True;True	1503;2258;3681;3747;4138;4683;6625;8476;8994;9300	1940;2933;4861;4862;4944;5435;6185;8823;11304;11958;12354;12355	2012;3057;5047;5048;5135;5641;6417;9186;11786;12456;12863;12864	2012;3057;5047;5135;5641;6417;9186;11786;12456;12864
P14923	P14923	15	15	14	Junction plakoglobin	JUP	sp|P14923|PLAK_HUMAN Junction plakoglobin OS=Homo sapiens OX=9606 GN=JUP PE=1 SV=3	1	15	15	14	34.1	34.1	32.8	81.744	745	745	0	95.954	381440000	18				368	459;3309;3769;4986;4991;5113;5469;5470;5591;5920;6755;7789;8053;8511;8711	True;True;True;True;True;True;True;True;True;True;True;True;True;True;True	472;3384;3854;5095;5100;5222;5583;5584;5706;6054;6917;7998;8276;8742;8946	602;4467;5078;6753;6758;6898;6899;7372;7373;7528;7978;7979;9205;10664;10665;11047;11659;11903	615;4646;5271;7015;7020;7163;7164;7649;7650;7811;8278;8279;9576;11120;11121;11518;12153;12401	615;4646;5271;7015;7020;7164;7649;7650;7811;8279;9576;11121;11518;12153;12401
P15259;Q8N0Y7;P18669	P15259;Q8N0Y7;P18669	1;1;1	1;1;1	1;1;1	Phosphoglycerate mutase 2;Probable phosphoglycerate mutase 4;Phosphoglycerate mutase 1	PGAM2;PGAM4;PGAM1	sp|P15259|PGAM2_HUMAN Phosphoglycerate mutase 2 OS=Homo sapiens OX=9606 GN=PGAM2 PE=1 SV=3;sp|Q8N0Y7|PGAM4_HUMAN Probable phosphoglycerate mutase 4 OS=Homo sapiens OX=9606 GN=PGAM4 PE=3 SV=1;sp|P18669|PGAM1_HUMAN Phosphoglycerate mutase 1 OS=Homo sapiens O	3	1	1	1	5.5	5.5	5.5	28.766	253	253;254;254	0.00079872	1.4611	3922900	1				369	466	TRUE	479	610	623	623
P15311;P26038	P15311;P26038	6;3	6;3	3;0	Ezrin;Moesin	EZR;MSN	sp|P15311|EZRI_HUMAN Ezrin OS=Homo sapiens OX=9606 GN=EZR PE=1 SV=4;sp|P26038|MOES_HUMAN Moesin OS=Homo sapiens OX=9606 GN=MSN PE=1 SV=3	2	6	6	3	13.8	13.8	9.4	69.412	586	586;577	0	14.486	43336000	4				370	551;1648;2521;3579;4602;6626	True;True;True;True;True;True	565;1686;2579;3659;4701;6778	713;2198;3357;4836;6206;9027	728;2278;3495;5021;6439;9394	728;2278;3495;5021;6439;9394
P15880	P15880	17	17	17	40S ribosomal protein S2	RPS2	sp|P15880|RS2_HUMAN 40S ribosomal protein S2 OS=Homo sapiens OX=9606 GN=RPS2 PE=1 SV=2	1	17	17	17	53.9	53.9	53.9	31.324	293	293	0	78.394	2486100000	23				371	241;718;875;1969;1970;2585;3060;3589;3785;4208;4985;5290;5291;7023;7190;7854;8050	True;True;True;True;True;True;True;True;True;True;True;True;True;True;True;True;True	249;735;896;2012;2013;2645;3131;3669;3873;4299;5092;5093;5094;5403;5404;7199;7374;8065;8273	315;316;317;946;1164;2625;2626;2627;3440;4122;4847;4848;5105;5650;6750;6751;6752;7146;7147;9606;9830;9831;10751;11043	322;323;324;971;1196;2731;2732;2733;3578;4290;5032;5033;5298;5857;7012;7013;7014;7422;7423;10003;10004;10241;10242;11209;11514	323;971;1196;2731;2733;3578;4290;5032;5298;5857;7012;7422;7423;10003;10242;11209;11514	87;88		215;216
P15924	P15924	29	29	29	Desmoplakin	DSP	sp|P15924|DESP_HUMAN Desmoplakin OS=Homo sapiens OX=9606 GN=DSP PE=1 SV=3	1	29	29	29	15.1	15.1	15.1	331.77	2871	2871	0	105.11	289150000	25				372	177;227;454;630;812;2024;2301;2807;2893;3141;3527;3682;3929;4821;4903;5303;5356;5958;6037;6041;6418;6910;7124;7285;7368;7388;7645;9005;9098	True;True;True;True;True;True;True;True;True;True;True;True;True;True;True;True;True;True;True;True;True;True;True;True;True;True;True;True;True	183;235;467;647;832;2069;2354;2874;2961;3212;3607;3764;4017;4923;5008;5416;5469;6093;6174;6178;6563;7080;7303;7473;7560;7580;7850;9243;9337	235;298;597;823;1087;2695;3059;3773;3897;4218;4768;4968;5281;6488;6622;7164;7228;8024;8137;8142;8734;9404;9736;9954;10062;10087;10473;12278;12398	238;303;610;839;1116;2802;3185;3928;4058;4390;4953;5159;5485;6732;6879;7440;7504;8324;8448;8454;9091;9783;10139;10372;10486;10512;10917;12782;12909	238;303;610;839;1116;2802;3185;3928;4058;4390;4953;5159;5485;6732;6879;7440;7504;8324;8448;8454;9091;9783;10139;10372;10486;10512;10917;12782;12909
P15927	P15927	7	7	7	Replication protein A 32 kDa subunit	RPA2	sp|P15927|RFA2_HUMAN Replication protein A 32 kDa subunit OS=Homo sapiens OX=9606 GN=RPA2 PE=1 SV=1	1	7	7	7	51.1	51.1	51.1	29.247	270	270	0	57.046	882030000	10				373	96;566;581;606;3472;6271;6544	True;True;True;True;True;True;True	97;580;597;622;3552;6414;6693	123;124;732;758;791;792;4707;8521;8913;8914	126;127;747;773;806;807;4892;8875;9279;9280	127;747;773;806;4892;8875;9279
P16070	P16070	2	2	2	CD44 antigen	CD44	sp|P16070|CD44_HUMAN CD44 antigen OS=Homo sapiens OX=9606 GN=CD44 PE=1 SV=3	1	2	2	2	3.5	3.5	3.5	81.537	742	742	0.0035997	0.73692	36873000	0				374	484;1992	True;True	497;2036	630;2654	643;2760	643;2760
Q8IUE6;Q96QV6;P16104	Q8IUE6;Q96QV6;P16104	2;2;2	1;1;1	1;1;1	Histone H2A type 2-B;Histone H2A type 1-A;Histone H2AX	HIST2H2AB;HIST1H2AA;H2AFX	sp|Q8IUE6|H2A2B_HUMAN Histone H2A type 2-B OS=Homo sapiens OX=9606 GN=HIST2H2AB PE=1 SV=3;sp|Q96QV6|H2A1A_HUMAN Histone H2A type 1-A OS=Homo sapiens OX=9606 GN=HIST1H2AA PE=1 SV=3;sp|P16104|H2AX_HUMAN Histone H2AX OS=Homo sapiens OX=9606 GN=H2AFX PE=1 SV=2	3	2	1	1	24.6	17.7	17.7	13.995	130	130;131;143	0	4.6671	0	1				375	276;4950	False;True	286;5057	366;6704	376;6965	376;6965
P16144	P16144	10	10	10	Integrin beta-4	ITGB4	sp|P16144|ITB4_HUMAN Integrin beta-4 OS=Homo sapiens OX=9606 GN=ITGB4 PE=1 SV=5	1	10	10	10	11.2	11.2	11.2	202.16	1822	1822	0	25.439	128740000	11				376	410;2207;3902;4925;5094;5673;6182;6876;8508;8597	True;True;True;True;True;True;True;True;True;True	423;2257;3990;5032;5203;5796;6323;7043;8739;8831	543;2932;5248;5249;6676;6877;7647;8353;9359;11656;11761	556;3056;5446;5447;6937;7142;7935;8684;9737;12150;12258	556;3056;5447;6937;7142;7935;8684;9737;12150;12258
P16401	P16401	1	1	1	Histone H1.5	HIST1H1B	sp|P16401|H15_HUMAN Histone H1.5 OS=Homo sapiens OX=9606 GN=HIST1H1B PE=1 SV=3	1	1	1	1	4.9	4.9	4.9	22.58	226	226	0.00080906	1.5404	9001100	1				377	388	TRUE	401	515	527	527
P16403	P16403	5	5	1	Histone H1.2	HIST1H1C	sp|P16403|H12_HUMAN Histone H1.2 OS=Homo sapiens OX=9606 GN=HIST1H1C PE=1 SV=2	1	5	5	1	23	23	7.5	21.364	213	213	0	6.4443	276130000	4				378	386;669;4061;6847;6918	True;True;True;True;True	399;686;4149;7013;7090	512;513;873;5449;9326;9436	524;525;894;5655;9701;9822	524;894;5655;9701;9822
P16615;O14983;Q93084	P16615	16;5;3	16;5;3	16;5;3	Sarcoplasmic/endoplasmic reticulum calcium ATPase 2	ATP2A2	sp|P16615|AT2A2_HUMAN Sarcoplasmic/endoplasmic reticulum calcium ATPase 2 OS=Homo sapiens OX=9606 GN=ATP2A2 PE=1 SV=1	3	16	16	16	20.9	20.9	20.9	114.76	1042	1042;1001;1043	0	66.299	351370000	17				379	376;518;1124;1589;1629;3915;3985;4057;5692;5995;6580;6620;7463;8164;8265;8682	True;True;True;True;True;True;True;True;True;True;True;True;True;True;True;True	389;532;1147;1627;1667;4003;4073;4145;5815;6131;6730;6772;7656;8389;8492;8917	497;498;674;1480;1481;2130;2131;2179;5264;5354;5443;5444;7668;8086;8959;9019;10184;11190;11320;11867;11868	508;509;689;1525;1526;2208;2209;2259;5463;5558;5649;5650;7956;8396;9325;9386;10613;11668;11803;12365;12366	508;689;1526;2208;2259;5463;5558;5650;7956;8396;9325;9386;10613;11668;11803;12366
P16989	P16989	9	5	5	Y-box-binding protein 3	YBX3	sp|P16989|YBOX3_HUMAN Y-box-binding protein 3 OS=Homo sapiens OX=9606 GN=YBX3 PE=1 SV=4	1	9	5	5	44.1	35.2	35.2	40.089	372	372	0	11.883	183630000	5				380	1556;2538;5810;5811;6169;6221;6812;7186;7372	False;True;False;False;True;True;True;True;False	1593;2596;5943;5944;6310;6363;6978;7370;7564	2057;2058;3379;7829;7830;7831;7832;8336;8337;8409;9283;9825;10067;10068;10069	2131;2132;3517;8122;8123;8124;8125;8667;8668;8741;9655;10236;10491;10492;10493	2132;3517;8123;8125;8667;8741;9655;10236;10491
P17066;P48741	P17066;P48741	7;4	1;1	1;1	Heat shock 70 kDa protein 6;Putative heat shock 70 kDa protein 7	HSPA6;HSPA7	sp|P17066|HSP76_HUMAN Heat shock 70 kDa protein 6 OS=Homo sapiens OX=9606 GN=HSPA6 PE=1 SV=2;sp|P48741|HSP77_HUMAN Putative heat shock 70 kDa protein 7 OS=Homo sapiens OX=9606 GN=HSPA7 PE=5 SV=2	2	7	1	1	12.8	1.7	1.7	71.027	643	643;367	0.00078125	1.2927	154030000	1				381	709;1247;2177;3659;5004;7948;8192	False;False;False;False;False;False;True	726;1277;2227;3739;5113;8167;8417	933;1652;2897;4932;4933;6772;10884;11223	958;1708;3020;5123;5124;7034;11342;11701	958;1708;3020;5123;7034;11342;11701
P17301	P17301	7	7	7	Integrin alpha-2	ITGA2	sp|P17301|ITA2_HUMAN Integrin alpha-2 OS=Homo sapiens OX=9606 GN=ITGA2 PE=1 SV=1	1	7	7	7	9.1	9.1	9.1	129.29	1181	1181	0	19.766	81896000	6				382	965;2225;2497;3557;3829;7875;8771	True;True;True;True;True;True;True	988;2275;2555;3637;3917;8089;9005	1290;2966;3321;4806;5158;5159;10782;11970	1329;3090;3458;4991;5353;5354;11240;12468	1329;3090;3458;4991;5354;11240;12468
P17655	P17655	1	1	1	Calpain-2 catalytic subunit	CAPN2	sp|P17655|CAN2_HUMAN Calpain-2 catalytic subunit OS=Homo sapiens OX=9606 GN=CAPN2 PE=1 SV=6	1	1	1	1	2.1	2.1	2.1	79.994	700	700	0	1.8523	6091800	1				383	6149	TRUE	6289	8310	8640	8640
P17812	P17812	3	3	3	CTP synthase 1	CTPS1	sp|P17812|PYRG1_HUMAN CTP synthase 1 OS=Homo sapiens OX=9606 GN=CTPS1 PE=1 SV=2	1	3	3	3	7.8	7.8	7.8	66.69	591	591	0	21.844	26140000	3				384	4936;8598;9093	True;True;True	5043;8832;9332	6688;11762;12392	6949;12259;12902;12903	6949;12259;12903
P17844	P17844	24	23	19	Probable ATP-dependent RNA helicase DDX5	DDX5	sp|P17844|DDX5_HUMAN Probable ATP-dependent RNA helicase DDX5 OS=Homo sapiens OX=9606 GN=DDX5 PE=1 SV=1	1	24	23	19	46.6	44.8	37.3	69.147	614	614	0	199.27	3257100000	31				385	564;1067;1411;1768;2489;2591;2764;4176;4337;4776;5010;5065;5659;5851;6243;6439;6518;6536;7460;7623;7680;7776;7962;8930	True;True;True;True;True;True;True;True;True;True;True;True;False;True;True;True;True;True;True;True;True;True;True;True	578;1090;1446;1807;2547;2651;2831;4267;4431;4878;5119;5174;5781;5782;5984;6385;6585;6666;6685;7653;7828;7885;7985;8182;9166	730;1413;1867;2361;2362;3308;3309;3449;3710;5609;5847;5848;6436;6437;6779;6844;7629;7630;7879;7880;8438;8439;8769;8770;8882;8904;10180;10430;10519;10647;10648;10914;12170	745;1458;1933;2445;2446;3445;3446;3587;3864;5816;6060;6061;6680;6681;7041;7106;7915;7916;7917;8174;8175;8771;8772;9131;9132;9248;9270;10608;10871;10966;11102;11103;11104;11378;12670	745;1458;1933;2445;3446;3587;3864;5816;6060;6680;7041;7106;7916;8175;8771;9132;9248;9270;10608;10871;10966;11104;11378;12670	58		253
P17858	P17858	4	2	2	ATP-dependent 6-phosphofructokinase, liver type	PFKL	sp|P17858|PFKAL_HUMAN ATP-dependent 6-phosphofructokinase, liver type OS=Homo sapiens OX=9606 GN=PFKL PE=1 SV=6	1	4	2	2	6.8	4.6	4.6	85.018	780	780	0	3.7193	17297000	2				386	5613;6852;7583;7609	False;True;False;True	5731;7018;7785;7811	7565;9331;10365;10401	7850;9706;10804;10842	7850;9706;10804;10842
P17931	P17931	5	5	5	Galectin-3	LGALS3	sp|P17931|LEG3_HUMAN Galectin-3 OS=Homo sapiens OX=9606 GN=LGALS3 PE=1 SV=5	1	5	5	5	25.6	25.6	25.6	26.152	250	250	0	11.976	198740000	7				387	2911;3872;5667;6507;8116	True;True;True;True;True	2981;3960;5790;6654;8339	3929;5208;5209;7639;7640;8866;11126	4090;5404;5405;7926;7927;9231;11600	4090;5404;7926;9231;11600
P17980	P17980	4	4	4	26S protease regulatory subunit 6A	PSMC3	sp|P17980|PRS6A_HUMAN 26S proteasome regulatory subunit 6A OS=Homo sapiens OX=9606 GN=PSMC3 PE=1 SV=3	1	4	4	4	15	15	15	49.203	439	439	0	15.221	21234000	4				388	1340;4384;6524;7795	True;True;True;True	1372;4479;6672;8004	1775;5913;8890;10672	1835;6130;9256;11128	1835;6130;9256;11128
P17987	P17987	17	17	17	T-complex protein 1 subunit alpha	TCP1	sp|P17987|TCPA_HUMAN T-complex protein 1 subunit alpha OS=Homo sapiens OX=9606 GN=TCP1 PE=1 SV=1	1	17	17	17	46.2	46.2	46.2	60.343	556	556	0	55.025	474510000	17				389	225;1927;2135;3412;3456;3613;3698;4733;5581;5681;7075;7396;7883;8422;8908;9106;9192	True;True;True;True;True;True;True;True;True;True;True;True;True;True;True;True;True	233;1969;2185;3492;3536;3693;3781;4834;5696;5804;7251;7588;8098;8653;9144;9345;9433	296;2566;2844;4632;4687;4877;4878;4989;6385;7518;7657;9674;10095;10096;10793;11547;12144;12406;12509	301;2672;2962;4813;4872;5065;5066;5180;6626;7801;7945;10075;10520;10521;11251;12040;12644;12917;13022	301;2672;2962;4813;4872;5065;5180;6626;7801;7945;10075;10521;11251;12040;12644;12917;13022
P18031	P18031	2	2	2	Tyrosine-protein phosphatase non-receptor type 1	PTPN1	sp|P18031|PTN1_HUMAN Tyrosine-protein phosphatase non-receptor type 1 OS=Homo sapiens OX=9606 GN=PTPN1 PE=1 SV=1	1	2	2	2	7.4	7.4	7.4	49.966	435	435	0	1.6545	3634600	2				390	2446;3030	True;True	2503;3101	3256;4077	3393;4244	3393;4244
P18077	P18077	2	2	2	60S ribosomal protein L35a	RPL35A	sp|P18077|RL35A_HUMAN 60S ribosomal protein L35a OS=Homo sapiens OX=9606 GN=RPL35A PE=1 SV=2	1	2	2	2	14.5	14.5	14.5	12.538	110	110	0	2.2328	24588000	2				391	994;3517	True;True	1017;3597	1328;4757	1369;4942	1369;4942
P18085;P84085;P84077;P61204	P18085	3;1;1;1	3;1;1;1	3;1;1;1	ADP-ribosylation factor 4	ARF4	sp|P18085|ARF4_HUMAN ADP-ribosylation factor 4 OS=Homo sapiens OX=9606 GN=ARF4 PE=1 SV=3	4	3	3	3	16.1	16.1	16.1	20.511	180	180;180;181;181	0	2.5338	42611000	4				392	957;3744;5674	True;True;True	980;3829;5797	1281;5048;7648	1319;1320;5241;7936	1320;5241;7936
P18124	P18124	6	6	6	60S ribosomal protein L7	RPL7	sp|P18124|RL7_HUMAN 60S ribosomal protein L7 OS=Homo sapiens OX=9606 GN=RPL7 PE=1 SV=1	1	6	6	6	31.5	31.5	31.5	29.225	248	248	0	11.247	83091000	5				393	1486;3429;3986;4380;7937;9059	True;True;True;True;True;True	1523;3509;4074;4475;8156;9298	1965;4657;5355;5909;10869;12352	2037;4841;5559;6126;11327;12861	2037;4841;5559;6126;11327;12861
P18621	P18621	6	6	6	60S ribosomal protein L17	RPL17	sp|P18621|RL17_HUMAN 60S ribosomal protein L17 OS=Homo sapiens OX=9606 GN=RPL17 PE=1 SV=3	1	6	6	6	32.6	32.6	32.6	21.397	184	184	0	62.587	644290000	10				394	1925;1926;2837;3810;4280;6744	True;True;True;True;True;True	1967;1968;2904;3898;4372;6906	2563;2564;2565;3812;3813;5135;5755;5756;9193;9194	2669;2670;2671;3967;3968;5329;5964;5965;9563;9564	2670;2671;3968;5329;5964;9564
P18887	P18887	2	2	2	DNA repair protein XRCC1	XRCC1	sp|P18887|XRCC1_HUMAN DNA repair protein XRCC1 OS=Homo sapiens OX=9606 GN=XRCC1 PE=1 SV=2	1	2	2	2	3.6	3.6	3.6	69.476	633	633	0.005614	0.6318	18251000	2				395	1330;4997	True;True	1362;5106	1764;6765	1824;7027	1824;7027
P19174	P19174	1	1	1	1-phosphatidylinositol 4,5-bisphosphate phosphodiesterase gamma-1	PLCG1	sp|P19174|PLCG1_HUMAN 1-phosphatidylinositol 4,5-bisphosphate phosphodiesterase gamma-1 OS=Homo sapiens OX=9606 GN=PLCG1 PE=1 SV=1	1	1	1	1	2.6	2.6	2.6	148.53	1290	1290	0.0022189	0.89764	4269600	1				396	4053	TRUE	4141	5438	5644	5644
P19338	P19338	17	17	17	Nucleolin	NCL	sp|P19338|NUCL_HUMAN Nucleolin OS=Homo sapiens OX=9606 GN=NCL PE=1 SV=3	1	17	17	17	26.2	26.2	26.2	76.613	710	710	0	193.27	1189200000	22				397	413;1484;2059;2248;2666;2777;2883;2884;3127;4118;4560;5803;6381;7784;8111;8190;8766	True;True;True;True;True;True;True;True;True;True;True;True;True;True;True;True;True	426;1521;2106;2300;2727;2844;2951;2952;3198;4208;4657;5936;6526;7993;8334;8415;9000	546;1961;1962;2743;2998;3545;3727;3885;3886;3887;4200;5526;5527;6146;7819;8680;8681;10659;11120;11220;11221;11964	559;2033;2034;2852;3124;3687;3882;4046;4047;4048;4371;5733;5734;6376;8112;9037;9038;11115;11594;11698;11699;12462	559;2034;2852;3124;3687;3882;4046;4047;4371;5733;6376;8112;9038;11115;11594;11699;12462
P19388	P19388	2	2	2	DNA-directed RNA polymerases I, II, and III subunit RPABC1	POLR2E	sp|P19388|RPAB1_HUMAN DNA-directed RNA polymerases I, II, and III subunit RPABC1 OS=Homo sapiens OX=9606 GN=POLR2E PE=1 SV=4	1	2	2	2	14.8	14.8	14.8	24.551	210	210	0	7.2451	9227500	1				398	437;3149	True;True	450;3220	577;4228	590;4400	590;4400
P19447	P19447	3	3	3	TFIIH basal transcription factor complex helicase XPB subunit	ERCC3	sp|P19447|ERCC3_HUMAN General transcription and DNA repair factor IIH helicase subunit XPB OS=Homo sapiens OX=9606 GN=ERCC3 PE=1 SV=1	1	3	3	3	6.1	6.1	6.1	89.277	782	782	0	2.6265	14825000	2				399	3398;4707;7111	True;True;True	3478;4808;7290	4615;6356;9721	4796;6595;10123	4796;6595;10123
P19474	P19474	14	14	14	E3 ubiquitin-protein ligase TRIM21	TRIM21	sp|P19474|RO52_HUMAN E3 ubiquitin-protein ligase TRIM21 OS=Homo sapiens OX=9606 GN=TRIM21 PE=1 SV=1	1	14	14	14	35.8	35.8	35.8	54.169	475	475	0	88.921	582690000	15				400	394;1069;1162;2168;3404;3607;4424;4754;5233;5843;6089;6417;7474;7475	True;True;True;True;True;True;True;True;True;True;True;True;True;True	407;1092;1186;2218;3484;3687;4520;4856;5345;5976;6228;6562;7667;7668	523;1415;1536;2886;2887;4621;4869;5966;6412;7072;7871;8230;8732;8733;10200;10201;10202	536;1460;1582;3009;3010;4802;5055;6185;6654;7344;8164;8554;9089;9090;10630;10631;10632	536;1460;1582;3010;4802;5055;6185;6654;7344;8164;8554;9089;10630;10632
P19525	P19525	8	8	8	Interferon-induced, double-stranded RNA-activated protein kinase	EIF2AK2	sp|P19525|E2AK2_HUMAN Interferon-induced, double-stranded RNA-activated protein kinase OS=Homo sapiens OX=9606 GN=EIF2AK2 PE=1 SV=2	1	8	8	8	19.8	19.8	19.8	62.094	551	551	0	38.039	150150000	10				401	255;1178;1700;3065;4457;5412;8410;9166	True;True;True;True;True;True;True;True	264;1204;1738;3136;4553;5526;8641;9406	336;1560;1561;2267;4130;6010;7298;7299;11534;12476	343;1609;1610;2349;4298;6232;7574;7575;12027;12987	343;1610;2349;4298;6232;7575;12027;12987
P19784	P19784	2	2	2	Casein kinase II subunit alpha	CSNK2A2	sp|P19784|CSK22_HUMAN Casein kinase II subunit alpha OS=Homo sapiens OX=9606 GN=CSNK2A2 PE=1 SV=1	1	2	2	2	7.1	7.1	7.1	41.213	350	350	0	4.1183	26909000	2				402	3289;6431	True;True	3364;6577	4434;8761	4613;9122	4613;9122
P20020;Q16720;Q01814	P20020	15;5;4	15;5;4	9;0;0	Plasma membrane calcium-transporting ATPase 1	ATP2B1	sp|P20020|AT2B1_HUMAN Plasma membrane calcium-transporting ATPase 1 OS=Homo sapiens OX=9606 GN=ATP2B1 PE=1 SV=4	3	15	15	9	19.4	19.4	11.4	134.68	1220	1220;1220;1243	0	69.168	255730000	16				403	873;1501;2742;3253;3852;4055;4322;5762;6541;6767;7010;7518;7519;7652;9048	True;True;True;True;True;True;True;True;True;True;True;True;True;True;True	894;1538;2808;3327;3940;4143;4416;5895;6690;6929;7185;7715;7716;7857;9287	1162;1984;3673;3674;4377;4378;5184;5441;5817;7771;8910;9218;9574;9575;10271;10272;10482;12339	1194;2057;3825;3826;4553;4554;5380;5647;6030;8064;9276;9589;9966;9967;10707;10708;10927;12848	1194;2057;3826;4554;5380;5647;6030;8064;9276;9589;9966;10707;10708;10927;12848
P20042	P20042	7	7	7	Eukaryotic translation initiation factor 2 subunit 2	EIF2S2	sp|P20042|IF2B_HUMAN Eukaryotic translation initiation factor 2 subunit 2 OS=Homo sapiens OX=9606 GN=EIF2S2 PE=1 SV=2	1	7	7	7	29.1	29.1	29.1	38.388	333	333	0	31.75	261570000	8				404	1440;2055;2372;2492;3529;3530;4161	True;True;True;True;True;True;True	1477;2102;2427;2550;3609;3610;4251	1910;2737;2738;3154;3313;4770;4771;4772;5589	1981;2846;2847;3285;3450;4955;4956;4957;5796	1981;2847;3285;3450;4956;4957;5796
P20226	P20226	1	1	1	TATA-box-binding protein	TBP	sp|P20226|TBP_HUMAN TATA-box-binding protein OS=Homo sapiens OX=9606 GN=TBP PE=1 SV=2	1	1	1	1	4.4	4.4	4.4	37.698	339	339	0.002193	0.82845	3941100	0				405	174	TRUE	179	231	234	234
P20290	P20290	1	1	1	Transcription factor BTF3	BTF3	sp|P20290|BTF3_HUMAN Transcription factor BTF3 OS=Homo sapiens OX=9606 GN=BTF3 PE=1 SV=1	1	1	1	1	10.7	10.7	10.7	22.168	206	206	0	2.4328	3139700	1				406	6424	TRUE	6569	8741	9098	9098
P20585	P20585	4	4	4	DNA mismatch repair protein Msh3	MSH3	sp|P20585|MSH3_HUMAN DNA mismatch repair protein Msh3 OS=Homo sapiens OX=9606 GN=MSH3 PE=1 SV=4	1	4	4	4	7.6	7.6	7.6	127.41	1137	1137	0.00078802	1.3701	13826000	4				407	4483;5735;6823;7985	True;True;True;True	4579;5862;6989;8205	6039;7730;9296;10942	6263;8022;9669;11406	6263;8022;9669;11406
P20618	P20618	1	1	1	Proteasome subunit beta type-1	PSMB1	sp|P20618|PSB1_HUMAN Proteasome subunit beta type-1 OS=Homo sapiens OX=9606 GN=PSMB1 PE=1 SV=2	1	1	1	1	8.3	8.3	8.3	26.489	241	241	0	2.2116	4723500	0				408	270	TRUE	280	358	368	368
P20839	P20839	2	2	2	Inosine-5-monophosphate dehydrogenase 1	IMPDH1	sp|P20839|IMDH1_HUMAN Inosine-5-monophosphate dehydrogenase 1 OS=Homo sapiens OX=9606 GN=IMPDH1 PE=1 SV=2	1	2	2	2	6.2	6.2	6.2	55.405	514	514	0.0062762	0.61148	5061900	1				409	2241;3526	True;True	2293;3606	2989;4767	3115;4952	3115;4952
P20929	P20929	1	1	1	Nebulin	NEB	sp|P20929|NEBU_HUMAN Nebulin OS=Homo sapiens OX=9606 GN=NEB PE=1 SV=5	1	1	1	1	0.3	0.3	0.3	772.91	6669	6669	0.0022239	0.90194	0	0				410	7699	TRUE	7905	10550	10999	10999	89	94	1631	1635
P21291	P21291	2	2	2	Cysteine and glycine-rich protein 1	CSRP1	sp|P21291|CSRP1_HUMAN Cysteine and glycine-rich protein 1 OS=Homo sapiens OX=9606 GN=CSRP1 PE=1 SV=3	1	2	2	2	19.2	19.2	19.2	20.567	193	193	0	3.238	30806000	1				411	2661;3146	True;True	2722;3217	3539;4225	3680;4397	3680;4397
P21333	P21333	45	45	42	Filamin-A	FLNA	sp|P21333|FLNA_HUMAN Filamin-A OS=Homo sapiens OX=9606 GN=FLNA PE=1 SV=4	1	45	45	42	31	31	29.7	280.74	2647	2647	0	247.1	1048100000	55				412	424;668;828;926;1056;1057;1370;1461;1507;1569;2218;2820;2892;3431;4301;4769;4956;5159;5413;5475;6433;6750;7163;7191;7581;7627;7629;7632;8094;8102;8202;8219;8286;8309;8321;8568;8622;8658;8720;8778;8785;8901;8985;9242;9263	True;True;True;True;True;True;True;True;True;True;True;True;True;True;True;True;True;True;True;True;True;True;True;True;True;True;True;True;True;True;True;True;True;True;True;True;True;True;True;True;True;True;True;True;True	437;685;848;949;1079;1080;1405;1498;1544;1607;2268;2887;2960;3511;4395;4871;5063;5269;5527;5589;6579;6912;7346;7375;7783;7832;7834;7837;8317;8325;8428;8446;8514;8538;8550;8802;8856;8893;8955;9012;9019;9137;9222;9484;9505	562;871;872;1105;1240;1241;1402;1403;1821;1935;1990;2073;2074;2956;3792;3895;3896;4660;5792;6429;6713;6958;7300;7380;8763;9200;9795;9832;10361;10362;10439;10440;10442;10443;10444;10449;10450;11100;11109;11110;11237;11263;11352;11378;11379;11398;11728;11793;11836;11912;11980;11981;11990;12135;12248;12249;12567;12592	575;892;893;1135;1278;1279;1447;1448;1886;2006;2063;2147;2148;3080;3947;4056;4057;4844;6003;6671;6975;7227;7576;7659;9124;9571;10203;10204;10243;10244;10800;10801;10881;10882;10884;10885;10886;10891;10892;11573;11582;11583;11715;11742;11836;11863;11864;11884;12223;12290;12333;12410;12478;12479;12488;12635;12752;12753;13082;13107;13108	575;893;1135;1278;1447;1448;1886;2006;2063;2148;3080;3947;4056;4844;6003;6671;6975;7227;7576;7659;9124;9571;10203;10244;10800;10882;10886;10892;11573;11583;11715;11742;11836;11864;11884;12223;12290;12333;12410;12478;12488;12635;12752;13082;13108
P21439	P21439	1	1	1	Multidrug resistance protein 3	ABCB4	sp|P21439|MDR3_HUMAN Phosphatidylcholine translocator ABCB4 OS=Homo sapiens OX=9606 GN=ABCB4 PE=1 SV=2	1	1	1	1	0.7	0.7	0.7	141.52	1286	1286	0.0094595	0.48623	0	0				413	8026	TRUE	8249	11015	11485	11485		16;95		908;910
P21589	P21589	7	7	7	5-nucleotidase	NT5E	sp|P21589|5NTD_HUMAN 5-nucleotidase OS=Homo sapiens OX=9606 GN=NT5E PE=1 SV=1	1	7	7	7	20.7	20.7	20.7	63.367	574	574	0	18.043	82308000	6				414	2019;2020;2377;2410;2947;9007;9070	True;True;True;True;True;True;True	2064;2065;2432;2466;3017;9245;9309	2689;2690;3162;3207;3977;12280;12365	2796;2797;3293;3342;4139;12784;12874	2796;2797;3293;3342;4139;12784;12874
P21796	P21796	1	1	1	Voltage-dependent anion-selective channel protein 1	VDAC1	sp|P21796|VDAC1_HUMAN Voltage-dependent anion-selective channel protein 1 OS=Homo sapiens OX=9606 GN=VDAC1 PE=1 SV=2	1	1	1	1	7.1	7.1	7.1	30.772	283	283	0	1.6629	11309000	1				415	8562	TRUE	8796	11721	12216	12216
P21964	P21964	1	1	1	Catechol O-methyltransferase	COMT	sp|P21964|COMT_HUMAN Catechol O-methyltransferase OS=Homo sapiens OX=9606 GN=COMT PE=1 SV=2	1	1	1	1	5.9	5.9	5.9	30.037	271	271	0	1.8039	4455700	1				416	8759	TRUE	8993	11957	12455	12455
P22061	P22061	3	3	3	Protein-L-isoaspartate(D-aspartate) O-methyltransferase	PCMT1	sp|P22061|PIMT_HUMAN Protein-L-isoaspartate(D-aspartate) O-methyltransferase OS=Homo sapiens OX=9606 GN=PCMT1 PE=1 SV=4	1	3	3	3	30.8	30.8	30.8	24.636	227	227	0	9.1956	46229000	3				417	4800;5626;5652	True;True;True	4902;5747;5774	6465;7586;7620	6709;7872;7906	6709;7872;7906
P22087	P22087	5	5	4	rRNA 2-O-methyltransferase fibrillarin	FBL	sp|P22087|FBRL_HUMAN rRNA 2-O-methyltransferase fibrillarin OS=Homo sapiens OX=9606 GN=FBL PE=1 SV=2	1	5	5	4	28	28	24.6	33.784	321	321	0	23.921	232250000	10				418	1070;3980;4351;8525;8694	True;True;True;True;True	1093;4068;4445;8757;8929	1416;1417;5346;5347;5869;5870;5871;11676;11882;11883	1461;1462;5550;5551;6083;6084;6085;12171;12380;12381	1462;5550;6085;12171;12381
P22102	P22102	2	2	2	Trifunctional purine biosynthetic protein adenosine-3;Phosphoribosylamine--glycine ligase;Phosphoribosylformylglycinamidine cyclo-ligase;Phosphoribosylglycinamide formyltransferase	GART	sp|P22102|PUR2_HUMAN Trifunctional purine biosynthetic protein adenosine-3 OS=Homo sapiens OX=9606 GN=GART PE=1 SV=1	1	2	2	2	2.5	2.5	2.5	107.77	1010	1010	0	1.7182	9385700	2				419	2211;4046	True;True	2261;4134	2947;5431	3071;5637	3071;5637
P22234	P22234	5	5	5	Multifunctional protein ADE2;Phosphoribosylaminoimidazole-succinocarboxamide synthase;Phosphoribosylaminoimidazole carboxylase	PAICS	sp|P22234|PUR6_HUMAN Multifunctional protein ADE2 OS=Homo sapiens OX=9606 GN=PAICS PE=1 SV=3	1	5	5	5	15.8	15.8	15.8	47.079	425	425	0	13.852	69327000	5				420	94;707;1730;3971;8849	True;True;True;True;True	95;724;1768;4059;9084	121;930;2305;5336;12067;12068	124;955;2388;5540;12567;12568	124;955;2388;5540;12567
P22314	P22314	2	2	2	Ubiquitin-like modifier-activating enzyme 1	UBA1	sp|P22314|UBA1_HUMAN Ubiquitin-like modifier-activating enzyme 1 OS=Homo sapiens OX=9606 GN=UBA1 PE=1 SV=3	1	2	2	2	3.6	3.6	3.6	117.85	1058	1058	0.0022506	0.952	5357100	2				421	4028;9040	True;True	4116;9279	5411;12328	5617;12837	5617;12837
P22626	P22626	18	18	18	Heterogeneous nuclear ribonucleoproteins A2/B1	HNRNPA2B1	sp|P22626|ROA2_HUMAN Heterogeneous nuclear ribonucleoproteins A2/B1 OS=Homo sapiens OX=9606 GN=HNRNPA2B1 PE=1 SV=2	1	18	18	18	55.2	55.2	55.2	37.429	353	353	0	118.88	2987500000	28				422	1422;1597;2670;2673;2674;2734;3492;4202;4204;4612;4645;5350;5993;6157;6301;6606;7718;9084	True;True;True;True;True;True;True;True;True;True;True;True;True;True;True;True;True;True	1458;1635;2731;2734;2735;2800;3572;4293;4295;4711;4745;5463;6128;6297;6445;6757;7924;9323	1882;2140;2141;3549;3550;3553;3554;3665;4729;5643;5645;5646;6217;6261;6262;6263;6264;6265;6266;6267;6268;7221;8077;8078;8322;8567;8996;8997;10572;12382	1949;2218;2219;3691;3692;3695;3696;3817;4914;5850;5852;5853;6451;6495;6496;6497;6498;6499;6500;6501;6502;7497;8386;8387;8652;8923;9363;9364;11021;12892	1949;2218;3692;3695;3696;3817;4914;5850;5853;6451;6500;7497;8386;8652;8923;9364;11021;12892
P22695	P22695	1	1	1	Cytochrome b-c1 complex subunit 2, mitochondrial	UQCRC2	sp|P22695|QCR2_HUMAN Cytochrome b-c1 complex subunit 2, mitochondrial OS=Homo sapiens OX=9606 GN=UQCRC2 PE=1 SV=3	1	1	1	1	4.6	4.6	4.6	48.442	453	453	0.00080645	1.5192	11482000	1				423	754	TRUE	772	1004	1031	1031
P23229	P23229	7	7	7	Integrin alpha-6;Integrin alpha-6 heavy chain;Integrin alpha-6 light chain;Processed integrin alpha-6	ITGA6	sp|P23229|ITA6_HUMAN Integrin alpha-6 OS=Homo sapiens OX=9606 GN=ITGA6 PE=1 SV=5	1	7	7	7	11.1	11.1	11.1	126.6	1130	1130	0	25.427	77894000	8				424	4773;5119;5254;6087;6775;6816;8361	True;True;True;True;True;True;True	4875;5228;5366;6226;6937;6982;8590	6433;6905;7098;8228;9229;9287;11454	6675;7170;7370;8552;9600;9601;9659;11941	6675;7170;7370;8552;9600;9659;11941
P23246	P23246	34	34	33	Splicing factor, proline- and glutamine-rich	SFPQ	sp|P23246|SFPQ_HUMAN Splicing factor, proline- and glutamine-rich OS=Homo sapiens OX=9606 GN=SFPQ PE=1 SV=2	1	34	34	33	48.8	48.8	47.7	76.149	707	707	0	265.05	19029000000	85				425	175;390;538;819;904;936;1138;1562;1604;1863;2126;2136;2239;2383;2808;2809;2903;3007;3892;4572;4648;4649;5575;5576;5610;5627;5695;5974;6184;6241;6347;6488;6655;6702	True;True;True;True;True;True;True;True;True;True;True;True;True;True;True;True;True;True;True;True;True;True;True;True;True;True;True;True;True;True;True;True;True;True	180;181;403;552;839;927;959;1161;1162;1600;1642;1904;2175;2186;2291;2438;2439;2875;2876;2972;3078;3980;4669;4748;4749;5690;5691;5727;5728;5748;5819;6109;6325;6383;6492;6635;6808;6809;6861	232;233;517;699;1096;1208;1209;1255;1498;1499;1500;1501;1502;1503;1504;1505;2066;2150;2484;2829;2830;2845;2846;2987;3171;3172;3173;3174;3175;3774;3775;3776;3917;4052;5235;5236;6161;6162;6273;6274;6275;6276;6277;6278;6279;7510;7511;7512;7560;7561;7562;7587;7678;8051;8052;8053;8054;8055;8355;8356;8432;8433;8434;8435;8436;8629;8630;8631;8632;8835;9067;9068;9069;9070;9137	235;236;529;714;1125;1126;1241;1242;1293;1543;1544;1545;1546;1547;1548;1549;1550;1551;2140;2229;2580;2944;2945;2946;2947;2963;2964;2965;3112;3113;3303;3304;3305;3306;3307;3308;3929;3930;3931;4078;4216;5433;5434;6391;6392;6507;6508;6509;6510;6511;6512;6513;6514;7793;7794;7795;7845;7846;7847;7873;7967;8357;8358;8359;8360;8361;8362;8363;8364;8686;8687;8765;8766;8767;8768;8769;8986;8987;8988;8989;919…	236;529;714;1125;1241;1293;1548;2140;2229;2580;2947;2965;3112;3305;3929;3930;4078;4216;5433;6392;6508;6512;7793;7795;7847;7873;7967;8358;8687;8767;8989;9198;9434;9507	90;91;92;93;94		357;523;557;612;653
Q9NRH3;P23258	Q9NRH3;P23258	3;3	3;3	3;3	Tubulin gamma-2 chain;Tubulin gamma-1 chain	TUBG2;TUBG1	sp|Q9NRH3|TBG2_HUMAN Tubulin gamma-2 chain OS=Homo sapiens OX=9606 GN=TUBG2 PE=2 SV=1;sp|P23258|TBG1_HUMAN Tubulin gamma-1 chain OS=Homo sapiens OX=9606 GN=TUBG1 PE=1 SV=2	2	3	3	3	10.6	10.6	10.6	51.091	451	451;451	0	5.9886	22260000	3				426	786;4404;4745	True;True;True	804;4499;4847	1046;5938;6401	1074;6157;6643	1074;6157;6643
P23284	P23284	2	2	2	Peptidyl-prolyl cis-trans isomerase B	PPIB	sp|P23284|PPIB_HUMAN Peptidyl-prolyl cis-trans isomerase B OS=Homo sapiens OX=9606 GN=PPIB PE=1 SV=2	1	2	2	2	9.3	9.3	9.3	23.742	216	216	0	2.9708	32193000	2				427	3536;8438	True;True	3616;8669	4778;4779;11567	4963;4964;12061	4964;12061
P23396	P23396	18	18	18	40S ribosomal protein S3	RPS3	sp|P23396|RS3_HUMAN 40S ribosomal protein S3 OS=Homo sapiens OX=9606 GN=RPS3 PE=1 SV=2	1	18	18	18	71.2	71.2	71.2	26.688	243	243	0	95.471	5589100000	32				428	179;984;1761;1846;2216;2266;2477;2480;2730;2828;3780;3879;4249;4250;4949;6343;6592;7535	True;True;True;True;True;True;True;True;True;True;True;True;True;True;True;True;True;True	185;1007;1800;1886;2266;2318;2534;2537;2538;2792;2895;3866;3867;3967;4340;4341;4342;5056;6488;6742;7732	237;238;1315;2351;2352;2353;2461;2462;2953;2954;3018;3289;3290;3293;3294;3295;3296;3297;3629;3801;5097;5098;5219;5707;5708;5709;5710;5711;5712;5713;6703;8623;8974;8975;10289;10290	240;241;1354;2435;2436;2437;2557;2558;3077;3078;3144;3426;3427;3430;3431;3432;3433;3434;3775;3776;3956;5290;5291;5417;5915;5916;5917;5918;5919;5920;5921;6964;8980;9341;9342;10726;10727	240;1354;2435;2558;3078;3144;3427;3434;3775;3956;5291;5417;5918;5919;6964;8980;9342;10726	95;96	96	157;189	221
P23511	P23511	1	1	1	Nuclear transcription factor Y subunit alpha	NFYA	sp|P23511|NFYA_HUMAN Nuclear transcription factor Y subunit alpha OS=Homo sapiens OX=9606 GN=NFYA PE=1 SV=2	1	1	1	1	5.5	5.5	5.5	36.876	347	347	0	3.7544	4032400	2				429	3830	TRUE	3918	5160	5355;5356	5356
P23528	P23528	8	8	6	Cofilin-1	CFL1	sp|P23528|COF1_HUMAN Cofilin-1 OS=Homo sapiens OX=9606 GN=CFL1 PE=1 SV=3	1	8	8	6	64.5	64.5	47.6	18.502	166	166	0	26.24	341080000	10				430	670;783;1716;3187;4094;4683;5889;8983	True;True;True;True;True;True;True;True	687;801;1754;3259;4184;4784;6023;9220	874;1042;1043;2286;4284;4285;5498;6330;7933;12246	895;1070;1071;2368;4458;4459;5704;6567;8232;12750	895;1071;2368;4458;5704;6567;8232;12750
P23588	P23588	10	10	10	Eukaryotic translation initiation factor 4B	EIF4B	sp|P23588|IF4B_HUMAN Eukaryotic translation initiation factor 4B OS=Homo sapiens OX=9606 GN=EIF4B PE=1 SV=2	1	10	10	10	23.7	23.7	23.7	69.15	611	611	0	58.86	148610000	9				431	71;6246;6602;6960;7178;7179;7675;7676;8167;8970	True;True;True;True;True;True;True;True;True;True	72;6388;6753;7133;7361;7362;7880;7881;8392;9206	96;8479;8989;9493;9811;9812;10514;10515;11194;12216	97;8829;9356;9884;10222;10223;10961;10962;11672;12719	97;8829;9356;9884;10222;10223;10961;10962;11672;12719
P23634	P23634	8	2	2	Plasma membrane calcium-transporting ATPase 4	ATP2B4	sp|P23634|AT2B4_HUMAN Plasma membrane calcium-transporting ATPase 4 OS=Homo sapiens OX=9606 GN=ATP2B4 PE=1 SV=2	1	8	2	2	10.7	2.8	2.8	137.92	1241	1241	0	4.6961	18871000	2				432	942;1501;3253;4055;5762;6541;7910;9048	True;False;False;False;False;False;True;False	965;1538;3327;4143;5895;6690;8126;9287	1262;1984;4377;4378;5441;7771;8910;10827;12339	1300;2057;4553;4554;5647;8064;9276;11285;12848	1300;2057;4554;5647;8064;9276;11285;12848
P23921	P23921	2	2	2	Ribonucleoside-diphosphate reductase large subunit	RRM1	sp|P23921|RIR1_HUMAN Ribonucleoside-diphosphate reductase large subunit OS=Homo sapiens OX=9606 GN=RRM1 PE=1 SV=1	1	2	2	2	5.4	5.4	5.4	90.069	792	792	0	10.04	11665000	2				433	8368;8504	True;True	8597;8735	11463;11651	11951;12145	11951;12145
P24468	P24468	1	1	1	COUP transcription factor 2	NR2F2	sp|P24468|COT2_HUMAN COUP transcription factor 2 OS=Homo sapiens OX=9606 GN=NR2F2 PE=1 SV=1	1	1	1	1	2.4	2.4	2.4	45.571	414	414	0.0022762	1.0459	3087500	0				434	5663	TRUE	5786	7634	7921	7921
P24534	P24534	2	2	2	Elongation factor 1-beta	EEF1B2	sp|P24534|EF1B_HUMAN Elongation factor 1-beta OS=Homo sapiens OX=9606 GN=EEF1B2 PE=1 SV=3	1	2	2	2	20.9	20.9	20.9	24.763	225	225	0	24.37	18403000	2				435	7150;7413	True;True	7332;7605	9779;10118	10186;10545	10186;10545
P24666	P24666	2	2	2	Low molecular weight phosphotyrosine protein phosphatase	ACP1	sp|P24666|PPAC_HUMAN Low molecular weight phosphotyrosine protein phosphatase OS=Homo sapiens OX=9606 GN=ACP1 PE=1 SV=3	1	2	2	2	19	19	19	18.042	158	158	0	2.8523	16004000	2				436	7381;8165	True;True	7573;8390	10079;11191	10503;11669	10503;11669
P25098	P25098	1	1	1	Beta-adrenergic receptor kinase 1	ADRBK1	sp|P25098|ARBK1_HUMAN Beta-adrenergic receptor kinase 1 OS=Homo sapiens OX=9606 GN=GRK2 PE=1 SV=2	1	1	1	1	1	1	1	79.573	689	689	0.0069638	0.6067	72781000	1				437	4736	TRUE	4837	6388	6629	6629
P25205	P25205	11	11	11	DNA replication licensing factor MCM3	MCM3	sp|P25205|MCM3_HUMAN DNA replication licensing factor MCM3 OS=Homo sapiens OX=9606 GN=MCM3 PE=1 SV=3	1	11	11	11	22.9	22.9	22.9	90.98	808	808	0	55.164	121050000	11				438	298;352;2595;3036;3651;4989;7362;7841;7969;8089;9217	True;True;True;True;True;True;True;True;True;True;True	308;363;2655;3107;3731;5098;7553;8051;8189;8312;9459	389;464;3454;4086;4921;6756;10055;10729;10921;10922;11095;12540	399;475;3592;4253;5111;7018;10478;11187;11385;11386;11568;13055	399;475;3592;4253;5111;7018;10478;11187;11386;11568;13055
P25311	P25311	1	1	1	Zinc-alpha-2-glycoprotein	AZGP1	sp|P25311|ZA2G_HUMAN Zinc-alpha-2-glycoprotein OS=Homo sapiens OX=9606 GN=AZGP1 PE=1 SV=2	1	1	1	1	5.4	5.4	5.4	34.258	298	298	0	1.9378	8417700	1				439	1719	TRUE	1757	2290	2372	2372
P25398	P25398	3	3	3	40S ribosomal protein S12	RPS12	sp|P25398|RS12_HUMAN 40S ribosomal protein S12 OS=Homo sapiens OX=9606 GN=RPS12 PE=1 SV=3	1	3	3	3	41.7	41.7	41.7	14.515	132	132	0	84.871	295430000	6				440	157;5425;6259	True;True;True	161;162;5539;6402	209;210;7313;7314;8501;8502	212;213;7589;7590;8853;8854	213;7590;8853	97		12
P25685	P25685	1	1	1	DnaJ homolog subfamily B member 1	DNAJB1	sp|P25685|DNJB1_HUMAN DnaJ homolog subfamily B member 1 OS=Homo sapiens OX=9606 GN=DNAJB1 PE=1 SV=4	1	1	1	1	5.3	5.3	5.3	38.044	340	340	0	3.5158	8402800	1				441	1637	TRUE	1675	2187	2267	2267
P25705	P25705	11	11	11	ATP synthase subunit alpha, mitochondrial	ATP5A1	sp|P25705|ATPA_HUMAN ATP synthase subunit alpha, mitochondrial OS=Homo sapiens OX=9606 GN=ATP5F1A PE=1 SV=1	1	11	11	11	27.8	27.8	27.8	59.75	553	553	0	41.803	277790000	12				442	766;1512;2036;2187;3161;4846;7593;7622;7895;8505;8790	True;True;True;True;True;True;True;True;True;True;True	784;1549;2081;2237;3232;4948;7795;7827;8110;8736;9024	1019;1996;2710;2711;2909;2910;4246;6524;10384;10429;10807;11652;11996	1046;2069;2818;2819;3032;3033;4419;6770;10825;10870;11265;12146;12494	1046;2069;2819;3033;4419;6770;10825;10870;11265;12146;12494
P25787	P25787	2	2	2	Proteasome subunit alpha type-2	PSMA2	sp|P25787|PSA2_HUMAN Proteasome subunit alpha type-2 OS=Homo sapiens OX=9606 GN=PSMA2 PE=1 SV=2	1	2	2	2	17.1	17.1	17.1	25.898	234	234	0	2.0259	8256200	2				443	5466;9168	True;True	5580;9408	7368;12478	7645;12989	7645;12989
P25788	P25788	1	1	1	Proteasome subunit alpha type-3	PSMA3	sp|P25788|PSA3_HUMAN Proteasome subunit alpha type-3 OS=Homo sapiens OX=9606 GN=PSMA3 PE=1 SV=2	1	1	1	1	3.5	3.5	3.5	28.433	255	255	0.0015468	1.1848	12237000	1				444	8245	TRUE	8472	11298	11780	11780
P25789	P25789	1	1	1	Proteasome subunit alpha type-4	PSMA4	sp|P25789|PSA4_HUMAN Proteasome subunit alpha type-4 OS=Homo sapiens OX=9606 GN=PSMA4 PE=1 SV=1	1	1	1	1	8.4	8.4	8.4	29.483	261	261	0.0049858	0.67755	3378400	1				445	9142	TRUE	9381	12449	12960	12960
P26006	P26006	2	2	2	Integrin alpha-3;Integrin alpha-3 heavy chain;Integrin alpha-3 light chain	ITGA3	sp|P26006|ITA3_HUMAN Integrin alpha-3 OS=Homo sapiens OX=9606 GN=ITGA3 PE=1 SV=5	1	2	2	2	2.6	2.6	2.6	116.61	1051	1051	0	3.7753	24028000	2				446	1465;4558	True;True	1502;4655	1939;6144	2011;6374	2011;6374
P26196	P26196	22	22	22	Probable ATP-dependent RNA helicase DDX6	DDX6	sp|P26196|DDX6_HUMAN Probable ATP-dependent RNA helicase DDX6 OS=Homo sapiens OX=9606 GN=DDX6 PE=1 SV=2	1	22	22	22	62.9	62.9	62.9	54.416	483	483	0	161.99	1994800000	31				447	1244;2222;2223;2347;2913;2970;3112;4087;4174;4379;4486;5196;5982;6100;6364;6886;6943;7116;7547;8150;8305;8532	True;True;True;True;True;True;True;True;True;True;True;True;True;True;True;True;True;True;True;True;True;True	1274;2272;2273;2400;2983;3040;3183;4176;4265;4474;4582;5307;6117;6239;6509;7054;7116;7295;7747;8375;8534;8764	1648;1649;2962;2963;3119;3120;3932;4005;4182;5484;5485;5606;5607;5908;6042;6043;7007;7008;8063;8244;8654;8655;8656;8657;9371;9471;9727;9728;10316;11171;11172;11373;11684	1704;1705;3086;3087;3247;3248;4093;4167;4352;5690;5691;5813;5814;6125;6267;6268;7277;7278;8372;8569;9011;9012;9013;9014;9749;9861;10130;10131;10754;11647;11648;11858;12179	1704;3086;3087;3247;4093;4167;4352;5690;5813;6125;6268;7277;8372;8569;9011;9749;9861;10131;10754;11648;11858;12179
P26232	P26232	3	1	1	Catenin alpha-2	CTNNA2	sp|P26232|CTNA2_HUMAN Catenin alpha-2 OS=Homo sapiens OX=9606 GN=CTNNA2 PE=1 SV=5	1	3	1	1	4.2	1.9	1.9	105.31	953	953	0.0022556	0.96861	5439300	1				448	4928;6283;8889	True;False;False	5035;6427;9124	6679;8543;12118	6940;8899;12618	6940;8899;12618
P26358	P26358	16	16	16	DNA (cytosine-5)-methyltransferase 1	DNMT1	sp|P26358|DNMT1_HUMAN DNA (cytosine-5)-methyltransferase 1 OS=Homo sapiens OX=9606 GN=DNMT1 PE=1 SV=2	1	16	16	16	12.8	12.8	12.8	183.16	1616	1616	0	34.208	189600000	14				449	97;881;1196;1236;3216;3296;4107;5097;5143;5287;5349;5628;7192;8264;8616;8617	True;True;True;True;True;True;True;True;True;True;True;True;True;True;True;True	98;902;1222;1266;3288;3371;4197;5206;5253;5400;5462;5749;7376;8491;8850;8851	125;1170;1583;1639;4327;4444;5513;6880;6935;7142;7143;7220;7588;9833;11319;11786;11787	128;1202;1633;1693;4501;4623;5720;7145;7200;7418;7419;7496;7874;10245;11802;12283;12284	128;1202;1633;1693;4501;4623;5720;7145;7200;7419;7496;7874;10245;11802;12283;12284
P26368	P26368	8	8	8	Splicing factor U2AF 65 kDa subunit	U2AF2	sp|P26368|U2AF2_HUMAN Splicing factor U2AF 65 kDa subunit OS=Homo sapiens OX=9606 GN=U2AF2 PE=1 SV=4	1	8	8	8	35.8	35.8	35.8	53.5	475	475	0	43.361	240750000	12				450	521;3562;4608;4680;6675;6945;7360;8996	True;True;True;True;True;True;True;True	535;3642;4707;4781;6832;7118;7551;9233	678;679;4814;6212;6326;6327;9100;9101;9473;10052;10053;12263;12264	693;694;4999;6445;6563;6564;9468;9469;9863;10475;10476;12767;12768	694;4999;6445;6563;9469;9863;10475;12767
P26373	P26373	6	6	6	60S ribosomal protein L13	RPL13	sp|P26373|RL13_HUMAN 60S ribosomal protein L13 OS=Homo sapiens OX=9606 GN=RPL13 PE=1 SV=4	1	6	6	6	27.5	27.5	27.5	24.261	211	211	0	25.48	442810000	6				451	2687;4451;4798;6171;7314;7662	True;True;True;True;True;True	2748;4547;4900;6312;7505;7867	3572;6004;6463;8340;9995;10497	3715;6226;6707;8671;10415;10943	3715;6226;6707;8671;10415;10943	98		155
P26599	P26599	18	18	17	Polypyrimidine tract-binding protein 1	PTBP1	sp|P26599|PTBP1_HUMAN Polypyrimidine tract-binding protein 1 OS=Homo sapiens OX=9606 GN=PTBP1 PE=1 SV=1	1	18	18	17	69.9	69.9	68.4	57.221	531	531	0	174.42	1600100000	33				452	586;1425;1439;1879;2821;2995;3327;3425;3679;4212;5138;5295;5528;5547;5846;6012;8763;8765	True;True;True;True;True;True;True;True;True;True;True;True;True;True;True;True;True;True	602;1461;1476;1920;2888;3065;3404;3505;3761;4303;5248;5408;5642;5662;5979;6149;8997;8999	766;767;768;1885;1886;1907;1908;1909;2500;3793;4033;4034;4496;4651;4652;4965;5654;5655;6929;6930;7152;7153;7445;7446;7447;7475;7476;7874;8105;8106;11961;11963	781;782;783;1952;1953;1977;1978;1979;1980;2596;3948;4196;4197;4675;4833;4834;5156;5861;5862;7194;7195;7428;7429;7727;7728;7729;7758;7759;8167;8168;8169;8416;8417;12459;12461	782;1953;1978;2596;3948;4196;4675;4833;5156;5862;7194;7429;7727;7759;8169;8417;12459;12461
P26640	P26640	12	12	12	Valine--tRNA ligase	VARS	sp|P26640|SYVC_HUMAN Valine--tRNA ligase OS=Homo sapiens OX=9606 GN=VARS PE=1 SV=4	1	12	12	12	14.5	14.5	14.5	140.47	1264	1264	0	26.458	125220000	10				453	1260;1459;2084;2555;2700;3535;3816;4308;5461;7243;7337;8640	True;True;True;True;True;True;True;True;True;True;True;True	1291;1496;2131;2613;2761;3615;3904;4402;5575;7428;7528;8874	1672;1933;2773;3400;3589;4777;5144;5799;7362;9896;10025;11815	1729;2004;2882;3538;3733;4962;5338;6010;7639;10311;10448;12312	1729;2004;2882;3538;3733;4962;5338;6010;7639;10311;10448;12312
P26641	P26641	4	4	4	Elongation factor 1-gamma	EEF1G	sp|P26641|EF1G_HUMAN Elongation factor 1-gamma OS=Homo sapiens OX=9606 GN=EEF1G PE=1 SV=3	1	4	4	4	11	11	11	50.118	437	437	0	6.5728	47767000	4				454	431;3727;7317;8500	True;True;True;True	444;3811;7508;8731	570;5025;9999;11647	583;5217;10422;12141	583;5217;10422;12141
P27105	P27105	2	2	2	Erythrocyte band 7 integral membrane protein	STOM	sp|P27105|STOM_HUMAN Erythrocyte band 7 integral membrane protein OS=Homo sapiens OX=9606 GN=STOM PE=1 SV=3	1	2	2	2	12.5	12.5	12.5	31.73	288	288	0.0022321	0.91948	13879000	2				455	1503;6082	True;True	1540;6220	1986;8216;8217	2059;8540;8541	2059;8540
P27348	P27348	6	4	4	14-3-3 protein theta	YWHAQ	sp|P27348|1433T_HUMAN 14-3-3 protein theta OS=Homo sapiens OX=9606 GN=YWHAQ PE=1 SV=1	1	6	4	4	33.5	26.1	26.1	27.764	245	245	0	11.6	81024000	4				456	808;1336;5953;6516;6939;7442	True;False;False;True;True;True	828;1368;6088;6664;7112;7634	1082;1770;8018;8880;9467;10153;10154	1111;1830;8318;9246;9856;10581;10582	1111;1830;8318;9246;9856;10581
P27448;Q96L34;Q7KZI7;Q9P0L2	P27448;Q96L34;Q7KZI7;Q9P0L2	2;1;1;1	2;1;1;1	2;1;1;1	MAP/microtubule affinity-regulating kinase 3;MAP/microtubule affinity-regulating kinase 4;Serine/threonine-protein kinase MARK2;Serine/threonine-protein kinase MARK1	MARK3;MARK4;MARK2;MARK1	sp|P27448|MARK3_HUMAN MAP/microtubule affinity-regulating kinase 3 OS=Homo sapiens OX=9606 GN=MARK3 PE=1 SV=5;sp|Q96L34|MARK4_HUMAN MAP/microtubule affinity-regulating kinase 4 OS=Homo sapiens OX=9606 GN=MARK4 PE=1 SV=1;sp|Q7KZI7|MARK2_HUMAN Serine/threoni	4	2	2	2	3.2	3.2	3.2	84.428	753	753;752;788;795	0	2.5475	7592200	1				457	3413;4601	True;True	3493;4700	4633;6205	4814;6438	4814;6438
P27449	P27449	1	1	1	V-type proton ATPase 16 kDa proteolipid subunit	ATP6V0C	sp|P27449|VATL_HUMAN V-type proton ATPase 16 kDa proteolipid subunit OS=Homo sapiens OX=9606 GN=ATP6V0C PE=1 SV=1	1	1	1	1	11.6	11.6	11.6	15.736	155	155	0	10.933	11053000	1				458	6911	TRUE	7081	9405	9784	9784
P27635;Q96L21	P27635	9;4	9;4	9;4	60S ribosomal protein L10	RPL10	sp|P27635|RL10_HUMAN 60S ribosomal protein L10 OS=Homo sapiens OX=9606 GN=RPL10 PE=1 SV=4	2	9	9	9	42.1	42.1	42.1	24.604	214	214;214	0	60.465	753020000	13				459	385;1688;2281;2354;2355;2545;5679;8142;8313	True;True;True;True;True;True;True;True;True	398;1726;2333;2408;2409;2410;2603;5802;8366;8367;8542	511;2254;3035;3132;3133;3134;3389;7654;11159;11160;11161;11387;11388	523;2335;3161;3260;3261;3262;3527;7942;11633;11634;11635;11636;11873;11874	523;2335;3161;3261;3262;3527;7942;11636;11873	99;100		52;184
P27694;P29597	P27694	25;1	25;1	25;1	Replication protein A 70 kDa DNA-binding subunit;Replication protein A 70 kDa DNA-binding subunit, N-terminally processed	RPA1	sp|P27694|RFA1_HUMAN Replication protein A 70 kDa DNA-binding subunit OS=Homo sapiens OX=9606 GN=RPA1 PE=1 SV=2	2	25	25	25	57.1	57.1	57.1	68.137	616	616;1187	0	323.31	2564800000	41				460	30;708;745;1140;1327;2201;2276;2607;3121;3593;3594;4637;5454;5753;5812;6839;6901;6984;7100;8284;8332;8403;8829;8847;8955	True;True;True;True;True;True;True;True;True;True;True;True;True;True;True;True;True;True;True;True;True;True;True;True;True	31;725;763;1164;1359;2251;2328;2667;3192;3673;3674;4737;5568;5884;5885;5945;7005;7071;7158;7279;8511;8512;8561;8633;9063;9082;9191	36;931;932;991;992;1509;1510;1760;1761;2924;2925;3029;3468;4192;4193;4852;4853;4854;6250;7350;7758;7759;7833;9313;9314;9315;9393;9527;9528;9707;9708;11347;11348;11349;11415;11517;11518;12039;12040;12064;12065;12198	36;956;957;1018;1019;1555;1556;1820;1821;3047;3048;3155;3607;4362;4363;4364;5037;5038;5039;6484;7626;8051;8052;8126;9686;9687;9688;9772;9919;9920;10109;10110;11831;11832;11833;11901;12008;12009;12537;12538;12564;12565;12701	36;956;1019;1556;1820;3047;3155;3607;4363;5038;5039;6484;7626;8052;8126;9687;9772;9919;10110;11832;11901;12008;12538;12565;12701	101		14
P27695	P27695	2	2	2	DNA-(apurinic or apyrimidinic site) lyase;DNA-(apurinic or apyrimidinic site) lyase, mitochondrial	APEX1	sp|P27695|APEX1_HUMAN DNA-(apurinic or apyrimidinic site) lyase OS=Homo sapiens OX=9606 GN=APEX1 PE=1 SV=2	1	2	2	2	11.6	11.6	11.6	35.554	318	318	0	5.9692	17479000	2				461	4251;4518	True;True	4343;4614	5714;6081	5922;6306	5922;6306
P27708	P27708	11	9	9	CAD protein;Glutamine-dependent carbamoyl-phosphate synthase;Aspartate carbamoyltransferase;Dihydroorotase	CAD	sp|P27708|PYR1_HUMAN CAD protein OS=Homo sapiens OX=9606 GN=CAD PE=1 SV=3	1	11	9	9	7.1	6.4	6.4	242.98	2225	2225	0	11.584	49027000	9				462	60;440;1584;1705;4353;4395;4900;6872;7727;8455;8868	True;True;True;False;True;True;True;False;True;True;True	61;453;1622;1743;4447;4490;5005;7039;7933;8686;9103	83;582;2125;2273;5877;5926;6617;9355;10581;11587;12093	84;595;2203;2355;6093;6144;6874;9733;11030;12081;12593	84;595;2203;2355;6093;6144;6874;9733;11030;12081;12593
P27797	P27797	2	2	2	Calreticulin	CALR	sp|P27797|CALR_HUMAN Calreticulin OS=Homo sapiens OX=9606 GN=CALR PE=1 SV=1	1	2	2	2	10.3	10.3	10.3	48.141	417	417	0	3.6182	10953000	2				463	2516;6912	True;True	2574;7082	3352;9406	3490;9785	3490;9785
P27816	P27816	19	19	19	Microtubule-associated protein 4	MAP4	sp|P27816|MAP4_HUMAN Microtubule-associated protein 4 OS=Homo sapiens OX=9606 GN=MAP4 PE=1 SV=3	1	19	19	19	25.4	25.4	25.4	121	1152	1152	0	137.48	959080000	22				464	132;133;469;470;730;1004;1064;1226;1230;1404;1498;1702;4253;5767;6107;7954;7957;8091;8287	True;True;True;True;True;True;True;True;True;True;True;True;True;True;True;True;True;True;True	135;136;482;483;748;1027;1087;1254;1258;1439;1535;1740;4345;5900;6246;8174;8177;8314;8515	175;176;177;613;614;968;1342;1343;1410;1624;1629;1858;1980;2269;5716;5717;7776;8253;8254;10906;10909;11097;11353	178;179;180;626;627;994;1384;1385;1455;1676;1681;1924;2053;2351;5924;5925;8069;8578;8579;11369;11373;11570;11837	178;179;626;627;994;1384;1455;1676;1681;1924;2053;2351;5925;8069;8579;11369;11373;11570;11837		17		280
P27824	P27824	2	2	2	Calnexin	CANX	sp|P27824|CALX_HUMAN Calnexin OS=Homo sapiens OX=9606 GN=CANX PE=1 SV=2	1	2	2	2	4.2	4.2	4.2	67.567	592	592	0.0015198	1.0548	10531000	2				465	3066;4171	True;True	3137;4262	4131;5602	4299;5809	4299;5809
P28066	P28066	1	1	1	Proteasome subunit alpha type-5	PSMA5	sp|P28066|PSA5_HUMAN Proteasome subunit alpha type-5 OS=Homo sapiens OX=9606 GN=PSMA5 PE=1 SV=3	1	1	1	1	7.9	7.9	7.9	26.411	241	241	0	4.1523	10914000	1				466	346	TRUE	357	456	467	467
P28072	P28072	1	1	1	Proteasome subunit beta type-6	PSMB6	sp|P28072|PSB6_HUMAN Proteasome subunit beta type-6 OS=Homo sapiens OX=9606 GN=PSMB6 PE=1 SV=4	1	1	1	1	4.6	4.6	4.6	25.357	239	239	0.0076177	0.59242	5646000	0				467	4357	TRUE	4451	5881	6097	6097
P28288	P28288	5	5	5	ATP-binding cassette sub-family D member 3	ABCD3	sp|P28288|ABCD3_HUMAN ATP-binding cassette sub-family D member 3 OS=Homo sapiens OX=9606 GN=ABCD3 PE=1 SV=1	1	5	5	5	11.8	11.8	11.8	75.475	659	659	0	16.936	41259000	6				468	1647;2160;4655;7324;8450	True;True;True;True;True	1685;2210;4756;7515;8681	2197;2877;6290;10008;10009;11581	2277;2999;6525;10431;10432;12075	2277;2999;6525;10432;12075
P28715	P28715	2	2	2	DNA repair protein complementing XP-G cells	ERCC5	sp|P28715|ERCC5_HUMAN DNA repair protein complementing XP-G cells OS=Homo sapiens OX=9606 GN=ERCC5 PE=1 SV=3	1	2	2	2	3.8	3.8	3.8	133.11	1186	1186	0.00078186	1.2931	99219000	2				469	1673;3410	True;True	1711;3490	2229;4630	2310;4811	2310;4811
P28845	P28845	13	13	13	Corticosteroid 11-beta-dehydrogenase isozyme 1	HSD11B1	sp|P28845|DHI1_HUMAN Corticosteroid 11-beta-dehydrogenase isozyme 1 OS=Homo sapiens OX=9606 GN=HSD11B1 PE=1 SV=3	1	13	13	13	48.3	48.3	48.3	32.401	292	292	0	124.38	7435100000	39				470	805;806;1860;2120;2121;3711;4169;4317;5608;6295;8122;8385;8840	True;True;True;True;True;True;True;True;True;True;True;True;True	824;825;826;1901;2169;2170;3794;3795;4260;4411;5724;5725;6439;8345;8615;9074;9075	1072;1073;1074;1075;1076;1077;1078;1079;1080;2481;2819;2820;2821;2822;2823;5005;5006;5007;5600;5811;7551;7552;7553;7554;7555;7556;7557;7558;8558;8559;11133;11485;12052;12053;12054;12055;12056	1101;1102;1103;1104;1105;1106;1107;1108;1109;2577;2932;2933;2934;2935;2936;2937;2938;5196;5197;5198;5199;5807;6024;7835;7836;7837;7838;7839;7840;7841;7842;7843;8914;8915;11607;11973;12551;12552;12553;12554;12555;12556	1104;1108;2577;2935;2937;5198;5807;6024;7840;8914;11607;11973;12553	102;103;104;105;106		57;93;96;233;286
P29144	P29144	3	3	3	Tripeptidyl-peptidase 2	TPP2	sp|P29144|TPP2_HUMAN Tripeptidyl-peptidase 2 OS=Homo sapiens OX=9606 GN=TPP2 PE=1 SV=4	1	3	3	3	3.4	3.4	3.4	138.35	1249	1249	0.0015291	1.1082	21462000	3				471	706;2547;8591	True;True;True	723;2605;8825	929;3391;11754	954;3529;12250	954;3529;12250
P29508;P48594	P29508;P48594	2;1	2;1	2;1	Serpin B3;Serpin B4	SERPINB3;SERPINB4	sp|P29508|SPB3_HUMAN Serpin B3 OS=Homo sapiens OX=9606 GN=SERPINB3 PE=1 SV=2;sp|P48594|SPB4_HUMAN Serpin B4 OS=Homo sapiens OX=9606 GN=SERPINB4 PE=1 SV=2	2	2	2	2	6.9	6.9	6.9	44.564	390	390;390	0	4.5695	17011000	2				472	1209;2285	True;True	1235;2337	1599;3040	1649;3166	1649;3166
P29692	P29692	3	3	3	Elongation factor 1-delta	EEF1D	sp|P29692|EF1D_HUMAN Elongation factor 1-delta OS=Homo sapiens OX=9606 GN=EEF1D PE=1 SV=5	1	3	3	3	13.2	13.2	13.2	31.121	281	281	0	9.1522	28324000	3				473	3115;3447;6967	True;True;True	3186;3527;7141	4185;4678;9504	4355;4863;9896	4355;4863;9896
P29966	P29966	1	1	1	Myristoylated alanine-rich C-kinase substrate	MARCKS	sp|P29966|MARCS_HUMAN Myristoylated alanine-rich C-kinase substrate OS=Homo sapiens OX=9606 GN=MARCKS PE=1 SV=4	1	1	1	1	9.6	9.6	9.6	31.554	332	332	0	3.4419	12433000	1				474	1488	TRUE	1525	1967	2039	2039
P30041	P30041	2	2	2	Peroxiredoxin-6	PRDX6	sp|P30041|PRDX6_HUMAN Peroxiredoxin-6 OS=Homo sapiens OX=9606 GN=PRDX6 PE=1 SV=3	1	2	2	2	13.4	13.4	13.4	25.035	224	224	0	5.3986	9280200	2				475	5131;6187	True;True	5241;6328	6920;8359	7185;8690	7185;8690
P30049	P30049	1	1	1	ATP synthase subunit delta, mitochondrial	ATP5D	sp|P30049|ATPD_HUMAN ATP synthase subunit delta, mitochondrial OS=Homo sapiens OX=9606 GN=ATP5F1D PE=1 SV=2	1	1	1	1	8.3	8.3	8.3	17.49	168	168	0.00080128	1.4706	2784100	1				476	589	TRUE	605	771	786	786
P30050	P30050	6	6	6	60S ribosomal protein L12	RPL12	sp|P30050|RL12_HUMAN 60S ribosomal protein L12 OS=Homo sapiens OX=9606 GN=RPL12 PE=1 SV=1	1	6	6	6	54.5	54.5	54.5	17.818	165	165	0	162.97	812710000	9				477	905;1714;3313;3338;3595;6265	True;True;True;True;True;True	928;1752;3388;3415;3675;6408	1210;2284;4475;4476;4510;4511;4855;8510;8511	1243;2366;4654;4655;4689;4690;5040;8864;8865	1243;2366;4654;4690;5040;8864
P30101	P30101	1	1	1	Protein disulfide-isomerase A3	PDIA3	sp|P30101|PDIA3_HUMAN Protein disulfide-isomerase A3 OS=Homo sapiens OX=9606 GN=PDIA3 PE=1 SV=4	1	1	1	1	2.2	2.2	2.2	56.782	505	505	0	2.5129	4991400	1				478	1840	TRUE	1880	2454	2550	2550
P30153;P30154	P30153	9;1	9;1	9;1	Serine/threonine-protein phosphatase 2A 65 kDa regulatory subunit A alpha isoform	PPP2R1A	sp|P30153|2AAA_HUMAN Serine/threonine-protein phosphatase 2A 65 kDa regulatory subunit A alpha isoform OS=Homo sapiens OX=9606 GN=PPP2R1A PE=1 SV=4	2	9	9	9	25.5	25.5	25.5	65.308	589	589;601	0	22.089	77440000	10				479	8;364;1251;1609;1892;5395;6421;6756;6827	True;True;True;True;True;True;True;True;True	8;377;1281;1647;1933;5508;6566;6918;6993	8;484;1657;2155;2516;7272;8737;8738;9206;9300	8;495;1713;2234;2612;7548;9094;9095;9577;9673	8;495;1713;2234;2612;7548;9094;9577;9673
P30419;O60551	P30419	5;1	5;1	5;1	Glycylpeptide N-tetradecanoyltransferase 1	NMT1	sp|P30419|NMT1_HUMAN Glycylpeptide N-tetradecanoyltransferase 1 OS=Homo sapiens OX=9606 GN=NMT1 PE=1 SV=2	2	5	5	5	14.5	14.5	14.5	56.806	496	496;498	0	16.343	70062000	6				480	1110;2226;2655;4672;7418	True;True;True;True;True	1133;2276;2715;4773;7610	1463;2967;3530;6314;6315;10123	1508;3091;3670;6551;6552;10550	1508;3091;3670;6551;10550
P30519	P30519	1	1	1	Heme oxygenase 2	HMOX2	sp|P30519|HMOX2_HUMAN Heme oxygenase 2 OS=Homo sapiens OX=9606 GN=HMOX2 PE=1 SV=2	1	1	1	1	5.1	5.1	5.1	36.032	316	316	0	2.8465	5143800	1				481	6747	TRUE	6909	9197	9568	9568
P30622	P30622	6	6	6	CAP-Gly domain-containing linker protein 1	CLIP1	sp|P30622|CLIP1_HUMAN CAP-Gly domain-containing linker protein 1 OS=Homo sapiens OX=9606 GN=CLIP1 PE=1 SV=2	1	6	6	6	5.8	5.8	5.8	162.24	1438	1438	0	20.507	36054000	5				482	695;737;1591;4891;5384;6972	True;True;True;True;True;True	712;755;1629;4996;5497;7146	917;977;2133;6607;7259;9510	942;1003;2211;6864;7535;9902	942;1003;2211;6864;7535;9902
P30837	P30837	1	1	1	Aldehyde dehydrogenase X, mitochondrial	ALDH1B1	sp|P30837|AL1B1_HUMAN Aldehyde dehydrogenase X, mitochondrial OS=Homo sapiens OX=9606 GN=ALDH1B1 PE=1 SV=3	1	1	1	1	2.9	2.9	2.9	57.206	517	517	0	2.005	0	1				483	8074	TRUE	8297	11073	11545	11545
P31153	P31153	1	1	1	S-adenosylmethionine synthase isoform type-2	MAT2A	sp|P31153|METK2_HUMAN S-adenosylmethionine synthase isoform type-2 OS=Homo sapiens OX=9606 GN=MAT2A PE=1 SV=1	1	1	1	1	3.8	3.8	3.8	43.66	395	395	0.0055944	0.62299	13295000	0				484	9126	TRUE	9365	12432	12943	12943
P31327	P31327	81	81	79	Carbamoyl-phosphate synthase [ammonia], mitochondrial	CPS1	sp|P31327|CPSM_HUMAN Carbamoyl-phosphate synthase [ammonia], mitochondrial OS=Homo sapiens OX=9606 GN=CPS1 PE=1 SV=2	1	81	81	79	69.2	69.2	68.2	164.94	1500	1500	0	323.31	17904000000	138				485	21;192;210;213;335;632;722;742;791;863;886;914;916;1058;1099;1431;1705;1899;2053;2087;2298;2315;2485;2543;2791;2792;2867;2912;2985;2992;3154;3275;3428;3437;3510;3511;3704;3717;3776;4106;4306;4587;4589;5244;5414;5502;5539;5592;5715;6168;6235;6253;6255;6400;6444;6600;6705;6774;6872;6948;7035;7042;7363;7364;7365;7374;7471;7569;7881;7899;7998;8029;8030;8376;8456;8463;8539;8575;8689;8705;8789	True;True;True;True;True;True;True;True;True;True;True;True;True;True;True;True;True;True;True;True;True;True;True;True;True;True;True;True;True;True;True;True;True;True;True;True;True;True;True;True;True;True;True;True;True;True;True;True;True;True;True;True;True;True;True;True;True;True;True;True;True;True;True;True;True;True;True;True;True;True;True;True;True;True;True;True;True;True;True;True…	21;22;198;199;217;220;221;346;649;740;760;809;884;907;937;939;1081;1122;1467;1743;1940;2100;2134;2351;2368;2543;2601;2858;2859;2935;2982;3055;3062;3225;3350;3508;3517;3590;3591;3787;3801;3862;4196;4400;4686;4688;5356;5528;5616;5654;5707;5840;6309;6377;6396;6398;6545;6590;6751;6864;6936;7039;7121;7211;7218;7554;7555;7556;7557;7566;7664;7770;8095;8096;8114;8218;8219;8252;8253;8605;8606;8687;8694;87…	22;23;252;253;254;255;276;277;281;282;437;438;439;827;957;986;987;1051;1052;1151;1152;1177;1220;1222;1404;1452;1894;2273;2523;2524;2735;2776;3056;3078;3079;3302;3303;3385;3386;3387;3748;3749;3750;3850;3851;3930;3931;4021;4022;4030;4236;4237;4238;4411;4412;4656;4666;4667;4668;4747;4748;4749;4750;4996;4997;5015;5090;5512;5797;6188;6190;6191;6192;7085;7301;7413;7463;7464;7529;7530;7531;7702;7703;833…	22;23;256;257;258;259;280;281;282;286;287;447;448;449;843;983;1012;1013;1079;1080;1182;1183;1210;1254;1256;1449;1497;1962;2355;2620;2621;2622;2844;2885;3182;3205;3206;3439;3440;3523;3524;3525;3903;3904;3905;4005;4006;4091;4092;4184;4185;4193;4408;4409;4410;4587;4588;4839;4840;4850;4851;4852;4853;4932;4933;4934;4935;5187;5188;5207;5283;5719;6008;6420;6422;6423;6424;6425;7357;7577;7695;7746;7747;78…	22;258;280;286;447;843;983;1012;1080;1183;1210;1254;1256;1449;1497;1962;2355;2621;2844;2885;3182;3205;3440;3523;3903;3904;4006;4091;4185;4193;4410;4588;4840;4850;4932;4934;5188;5207;5283;5719;6008;6420;6424;7357;7577;7695;7747;7814;7991;8666;8758;8842;8846;9065;9137;9353;9510;9598;9733;9867;10018;10028;10479;10481;10482;10495;10624;10783;11248;11272;11428;11489;11491;11963;12082;12094;12189;12232…	107;108;109;110;111;112;113		462;508;585;616;769;1148;1209
P31689	P31689	7	7	7	DnaJ homolog subfamily A member 1	DNAJA1	sp|P31689|DNJA1_HUMAN DnaJ homolog subfamily A member 1 OS=Homo sapiens OX=9606 GN=DNAJA1 PE=1 SV=2	1	7	7	7	31.7	31.7	31.7	44.868	397	397	0	15.168	134940000	8				486	2029;3402;3614;3719;3948;6138;7682	True;True;True;True;True;True;True	2074;3482;3694;3803;4036;6278;7887	2701;4619;4879;4880;5017;5305;8299;10521	2808;4800;5067;5068;5209;5509;8627;8628;10968	2808;4800;5067;5209;5509;8628;10968
P31942	P31942	12	11	11	Heterogeneous nuclear ribonucleoprotein H3	HNRNPH3	sp|P31942|HNRH3_HUMAN Heterogeneous nuclear ribonucleoprotein H3 OS=Homo sapiens OX=9606 GN=HNRNPH3 PE=1 SV=2	1	12	11	11	49.4	47.1	47.1	36.926	346	346	0	133.98	3145600000	26				487	714;720;1044;1693;2701;2702;2723;2869;2902;7318;8310;9096	True;True;True;True;True;True;True;False;True;True;True;True	731;737;738;1067;1731;2762;2763;2785;2937;2970;2971;7509;8539;9335	938;939;948;949;950;951;952;953;954;1387;2259;3590;3591;3621;3853;3911;3912;3913;3914;3915;3916;10000;11380;11381;12395;12396	963;964;973;974;975;976;977;978;979;980;1432;2341;3734;3735;3767;4008;4072;4073;4074;4075;4076;4077;10423;11865;11866;12906;12907	964;975;1432;2341;3734;3735;3767;4008;4074;10423;11866;12906	114;115		199;251
P31943;Q9NQA5	P31943	20;1	20;1	11;0	Heterogeneous nuclear ribonucleoprotein H;Heterogeneous nuclear ribonucleoprotein H, N-terminally processed	HNRNPH1	sp|P31943|HNRH1_HUMAN Heterogeneous nuclear ribonucleoprotein H OS=Homo sapiens OX=9606 GN=HNRNPH1 PE=1 SV=4	2	20	20	11	57.5	57.5	35.4	49.229	449	449;729	0	179.73	3730600000	33				488	716;1194;1574;1663;2204;2578;2869;2874;3366;5664;5684;6225;6601;7319;8312;8742;9047;9095;9249;9252	True;True;True;True;True;True;True;True;True;True;True;True;True;True;True;True;True;True;True;True	733;1220;1612;1701;2254;2638;2937;2942;3444;5787;5807;6367;6752;7510;8541;8976;9286;9334;9491;9494	942;943;944;1580;1581;2079;2213;2214;2928;3432;3853;3860;4552;4553;7635;7660;8414;8415;8988;10001;10002;11384;11385;11386;11937;12337;12338;12394;12575;12578;12579	967;968;969;1630;1631;2153;2294;2295;3051;3570;4008;4015;4731;4732;4733;7922;7948;8746;8747;8748;9355;10424;10425;11869;11870;11871;11872;12435;12846;12847;12905;13090;13093;13094	969;1630;2153;2295;3051;3570;4008;4015;4732;7922;7948;8746;9355;10424;11871;12435;12846;12905;13090;13093
P31946	P31946	4	2	2	14-3-3 protein beta/alpha;14-3-3 protein beta/alpha, N-terminally processed	YWHAB	sp|P31946|1433B_HUMAN 14-3-3 protein beta/alpha OS=Homo sapiens OX=9606 GN=YWHAB PE=1 SV=3	1	4	2	2	20.3	13	13	28.082	246	246	0	4.1395	7785800	2				489	809;1336;3496;5953	True;False;True;False	829;1368;3576;6088	1083;1770;4733;8018	1112;1830;4918;8318	1112;1830;4918;8318
P31947	P31947	3	1	1	14-3-3 protein sigma	SFN	sp|P31947|1433S_HUMAN 14-3-3 protein sigma OS=Homo sapiens OX=9606 GN=SFN PE=1 SV=1	1	3	1	1	14.9	7.7	7.7	27.774	248	248	0.004298	0.69819	2831800	1				490	1336;5953;7929	False;False;True	1368;6088;8147	1770;8018;10855	1830;8318;11313	1830;8318;11313
P31948	P31948	1	1	1	Stress-induced-phosphoprotein 1	STIP1	sp|P31948|STIP1_HUMAN Stress-induced-phosphoprotein 1 OS=Homo sapiens OX=9606 GN=STIP1 PE=1 SV=1	1	1	1	1	2.4	2.4	2.4	62.639	543	543	0.0042918	0.69753	14561000	1				491	4464	TRUE	4560	6017	6239	6239
P32004	P32004	19	19	19	Neural cell adhesion molecule L1	L1CAM	sp|P32004|L1CAM_HUMAN Neural cell adhesion molecule L1 OS=Homo sapiens OX=9606 GN=L1CAM PE=1 SV=2	1	19	19	19	23.9	23.9	23.9	140	1257	1257	0	104.85	389170000	22				492	223;1200;2031;2250;2554;2989;3170;3801;5314;5450;5484;8659;8740;8925;8942;8945;9010;9066;9067	True;True;True;True;True;True;True;True;True;True;True;True;True;True;True;True;True;True;True	231;1226;2076;2302;2612;3059;3241;3889;5427;5564;5598;8894;8975;9161;9178;9181;9248;9305;9306	293;294;1587;1588;2703;3000;3398;3399;4026;4257;5125;7176;7345;7392;11837;11936;12164;12183;12186;12283;12284;12360;12361	298;299;1637;1638;2810;3126;3536;3537;4189;4431;5318;7452;7621;7672;12334;12434;12664;12684;12687;12787;12788;12869;12870	299;1638;2810;3126;3536;4189;4431;5318;7452;7621;7672;12334;12434;12664;12684;12687;12788;12869;12870
P32119	P32119	4	3	3	Peroxiredoxin-2	PRDX2	sp|P32119|PRDX2_HUMAN Peroxiredoxin-2 OS=Homo sapiens OX=9606 GN=PRDX2 PE=1 SV=5	1	4	3	3	31.8	26.3	26.3	21.892	198	198	0.00080972	1.5549	83127000	3				493	1645;4103;5464;6377	True;True;True;False	1683;4193;5578;6522	2195;5508;7365;8676	2275;5715;7642;9033	2275;5715;7642;9033
P32322;Q96C36	P32322;Q96C36	2;1	2;1	2;1	Pyrroline-5-carboxylate reductase 1, mitochondrial;Pyrroline-5-carboxylate reductase 2	PYCR1;PYCR2	sp|P32322|P5CR1_HUMAN Pyrroline-5-carboxylate reductase 1, mitochondrial OS=Homo sapiens OX=9606 GN=PYCR1 PE=1 SV=2;sp|Q96C36|P5CR2_HUMAN Pyrroline-5-carboxylate reductase 2 OS=Homo sapiens OX=9606 GN=PYCR2 PE=1 SV=1	2	2	2	2	9.7	9.7	9.7	33.36	319	319;320	0	4.4332	7344800	1				494	1633;7067	True;True	1671;7243	2183;9666	2263;10067	2263;10067
P32969	P32969	10	10	10	60S ribosomal protein L9	RPL9	sp|P32969|RL9_HUMAN 60S ribosomal protein L9 OS=Homo sapiens OX=9606 GN=RPL9 PE=1 SV=1	1	10	10	10	65.6	65.6	65.6	21.863	192	192	0	91.12	958260000	14				495	986;1015;2295;3110;4121;5722;6568;7399;7653;7668	True;True;True;True;True;True;True;True;True;True	1009;1038;2348;3181;4211;5847;6718;7591;7858;7873	1318;1319;1320;1355;3053;4180;5531;5532;7711;8945;8946;10099;10483;10503	1357;1358;1359;1400;3179;4350;5738;5739;8000;9311;9312;10524;10928;10949	1358;1400;3179;4350;5738;8000;9312;10524;10928;10949
P33176;O60282;Q12840	P33176	6;1;1	6;1;1	6;1;1	Kinesin-1 heavy chain	KIF5B	sp|P33176|KINH_HUMAN Kinesin-1 heavy chain OS=Homo sapiens OX=9606 GN=KIF5B PE=1 SV=1	3	6	6	6	10.9	10.9	10.9	109.68	963	963;957;1032	0	29.282	63433000	7				496	2392;2479;3899;6388;7093;7939	True;True;True;True;True;True	2448;2536;3987;6533;7271;8158	3186;3292;5244;8690;9696;9697;10872	3319;3429;5442;9047;10098;10099;11330	3319;3429;5442;9047;10099;11330
P33527	P33527	3	3	3	Multidrug resistance-associated protein 1	ABCC1	sp|P33527|MRP1_HUMAN Multidrug resistance-associated protein 1 OS=Homo sapiens OX=9606 GN=ABCC1 PE=1 SV=3	1	3	3	3	3.3	3.3	3.3	171.59	1531	1531	0	5.9212	34927000	3				497	3955;8137;8382	True;True;True	4043;8361;8612	5316;11152;11482	5520;11626;11970	5520;11626;11970
P33991	P33991	1	1	1	DNA replication licensing factor MCM4	MCM4	sp|P33991|MCM4_HUMAN DNA replication licensing factor MCM4 OS=Homo sapiens OX=9606 GN=MCM4 PE=1 SV=5	1	1	1	1	2	2	2	96.557	863	863	0	2.3164	11108000	1				498	4428	TRUE	4524	5972	6191	6191
P33992	P33992	8	8	8	DNA replication licensing factor MCM5	MCM5	sp|P33992|MCM5_HUMAN DNA replication licensing factor MCM5 OS=Homo sapiens OX=9606 GN=MCM5 PE=1 SV=5	1	8	8	8	13.9	13.9	13.9	82.285	734	734	0	14.614	104440000	7				499	2117;3823;4359;5216;6226;6853;8494;8750	True;True;True;True;True;True;True;True	2166;3911;4453;5328;6368;7019;8725;8984	2816;5151;5883;7052;8416;9332;11641;11947	2929;5346;6099;7324;8749;9707;12135;12445	2929;5346;6099;7324;8749;9707;12135;12445
P33993	P33993	12	12	12	DNA replication licensing factor MCM7	MCM7	sp|P33993|MCM7_HUMAN DNA replication licensing factor MCM7 OS=Homo sapiens OX=9606 GN=MCM7 PE=1 SV=4	1	12	12	12	23.5	23.5	23.5	81.307	719	719	0	22.657	163150000	12				500	3035;3443;4362;4413;4586;5750;6543;6591;6975;7029;7734;7866	True;True;True;True;True;True;True;True;True;True;True;True	3106;3523;4456;4508;4685;5881;6692;6741;7149;7205;7941;8079	4085;4674;5886;5948;5949;6187;7755;8912;8973;9513;9612;10591;10769	4252;4859;6102;6167;6168;6419;8048;9278;9340;9905;10010;11040;11227	4252;4859;6102;6167;6419;8048;9278;9340;9905;10010;11040;11227
P34932;O95757	P34932	15;2	15;2	14;1	Heat shock 70 kDa protein 4	HSPA4	sp|P34932|HSP74_HUMAN Heat shock 70 kDa protein 4 OS=Homo sapiens OX=9606 GN=HSPA4 PE=1 SV=4	2	15	15	14	31.7	31.7	30	94.33	840	840;839	0	62.663	228140000	12				501	268;1626;1843;1897;2579;4112;4260;4534;5074;5077;5713;5714;7128;8419;8931	True;True;True;True;True;True;True;True;True;True;True;True;True;True;True	278;1664;1883;1938;2639;4202;4352;4631;5183;5186;5838;5839;7307;8650;9167	356;2175;2458;2521;3433;5519;5726;6108;6854;6857;7700;7701;9740;11544;12171	366;2255;2554;2618;3571;5726;5935;6334;7116;7120;7989;7990;10143;12037;12671	366;2255;2554;2618;3571;5726;5935;6334;7116;7120;7989;7990;10143;12037;12671
P35221	P35221	12	12	10	Catenin alpha-1	CTNNA1	sp|P35221|CTNA1_HUMAN Catenin alpha-1 OS=Homo sapiens OX=9606 GN=CTNNA1 PE=1 SV=1	1	12	12	10	27.9	27.9	25.5	100.07	906	906	0	32.905	155930000	12				502	199;327;1985;2458;4785;6122;6283;6361;6419;7204;8512;8889	True;True;True;True;True;True;True;True;True;True;True;True	206;338;2029;2515;4887;6261;6427;6506;6564;7388;8743;9124	264;428;2647;3268;6449;8271;8543;8651;8735;9846;11660;12118	268;438;2753;3405;6693;8596;8899;9008;9092;10258;12154;12618	268;438;2753;3405;6693;8596;8899;9008;9092;10258;12154;12618
P35222	P35222	7	6	6	Catenin beta-1	CTNNB1	sp|P35222|CTNB1_HUMAN Catenin beta-1 OS=Homo sapiens OX=9606 GN=CTNNB1 PE=1 SV=1	1	7	6	6	18.4	17.2	17.2	85.496	781	781	0	11.589	87786000	7				503	86;256;2868;4797;5470;7906;8054	True;True;True;True;False;True;True	87;265;2936;4899;5584;8121;8277	112;337;3852;6462;7373;10822;11048	115;344;4007;6706;7650;11280;11519;11520	115;344;4007;6706;7650;11280;11520
P35232	P35232	5	5	5	Prohibitin	PHB	sp|P35232|PHB_HUMAN Prohibitin OS=Homo sapiens OX=9606 GN=PHB PE=1 SV=1	1	5	5	5	24.6	24.6	24.6	29.804	272	272	0	9.6291	58167000	5				504	25;1203;3723;4194;8486	True;True;True;True;True	26;1229;3807;4285;8717	28;29;1591;5021;5634;11631	28;29;1641;5213;5841;12125	29;1641;5213;5841;12125
P35241	P35241	4	1	1	Radixin	RDX	sp|P35241|RADI_HUMAN Radixin OS=Homo sapiens OX=9606 GN=RDX PE=1 SV=1	1	4	1	1	8.9	4.5	4.5	68.563	583	583	0	1.8313	6185500	1				505	551;1472;3579;4602	False;True;False;False	565;1509;3659;4701	713;1947;4836;6206	728;2019;5021;6439	728;2019;5021;6439
P35244	P35244	3	3	3	Replication protein A 14 kDa subunit	RPA3	sp|P35244|RFA3_HUMAN Replication protein A 14 kDa subunit OS=Homo sapiens OX=9606 GN=RPA3 PE=1 SV=1	1	3	3	3	43	43	43	13.569	121	121	0	32.102	59405000	4				506	1548;3644;3790	True;True;True	1585;3724;3878	2046;2047;4914;5111	2120;2121;5104;5304	2120;5104;5304
P35249	P35249	2	2	2	Replication factor C subunit 4	RFC4	sp|P35249|RFC4_HUMAN Replication factor C subunit 4 OS=Homo sapiens OX=9606 GN=RFC4 PE=1 SV=2	1	2	2	2	8.5	8.5	8.5	39.681	363	363	0	2.3026	25009000	1				507	3891;7025	True;True	3979;7201	5234;9608	5432;10006	5432;10006
P35250	P35250	4	4	4	Replication factor C subunit 2	RFC2	sp|P35250|RFC2_HUMAN Replication factor C subunit 2 OS=Homo sapiens OX=9606 GN=RFC2 PE=1 SV=3	1	4	4	4	16.4	16.4	16.4	39.157	354	354	0	7.3598	34074000	5				508	945;1869;3417;5088	True;True;True;True	968;1910;3497;5197	1265;2490;4638;4639;6869	1303;2586;4819;4820;7133	1303;2586;4819;7133
P35251	P35251	4	4	4	Replication factor C subunit 1	RFC1	sp|P35251|RFC1_HUMAN Replication factor C subunit 1 OS=Homo sapiens OX=9606 GN=RFC1 PE=1 SV=4	1	4	4	4	4.5	4.5	4.5	128.25	1148	1148	0	6.2214	23912000	4				509	2729;3626;3833;8005	True;True;True;True	2791;3706;3921;8227	3628;4894;5163;10975	3774;5083;5359;11442	3774;5083;5359;11442
P35268	P35268	3	3	3	60S ribosomal protein L22	RPL22	sp|P35268|RL22_HUMAN 60S ribosomal protein L22 OS=Homo sapiens OX=9606 GN=RPL22 PE=1 SV=2	1	3	3	3	42.2	42.2	42.2	14.787	128	128	0	17.291	92979000	3				510	282;2465;9042	True;True;True	292;2522;9281	372;3276;12332	382;3413;12841	382;3413;12841
P35527;CON__P35527	P35527;CON__P35527	29;28	28;27	28;27	Keratin, type I cytoskeletal 9	KRT9	sp|P35527|K1C9_HUMAN Keratin, type I cytoskeletal 9 OS=Homo sapiens OX=9606 GN=KRT9 PE=1 SV=3;	2	29	28	28	74.2	74.2	74.2	62.064	623	623;623	0	323.31	5672500000	69			+	511	1087;1280;1704;2443;2678;2722;2746;2747;3224;3684;4237;4443;4444;5746;5869;6153;6154;6298;6342;6532;6800;6801;6897;7338;7735;7751;8626;8627;8998	True;True;True;True;True;True;True;True;True;True;True;False;True;True;True;True;True;True;True;True;True;True;True;True;True;True;True;True;True	1110;1311;1742;2500;2739;2784;2812;2813;3296;3766;3767;4328;4539;4540;5876;5877;6002;6003;6293;6294;6442;6487;6680;6681;6962;6963;6964;6965;6966;6967;7067;7529;7942;7958;7959;8860;8861;9235;9236	1438;1439;1440;1696;2271;2272;3252;3562;3619;3620;3680;3681;3682;3683;3684;4335;4336;4337;4971;4972;4973;5690;5691;5993;5994;5995;7749;7750;7907;7908;7909;7910;8314;8315;8316;8317;8562;8563;8622;8898;8899;9261;9262;9263;9264;9265;9266;9267;9268;9269;9270;9388;9389;10026;10592;10609;10610;10611;10612;11797;11798;11799;12266;12267;12268;12269;12270	1483;1484;1485;1753;2353;2354;3389;3705;3765;3766;3832;3833;3834;3835;3836;3837;4510;4511;4512;4513;5162;5163;5164;5898;5899;6212;6213;6214;8041;8042;8204;8205;8206;8207;8208;8644;8645;8646;8647;8918;8919;8979;9264;9265;9633;9634;9635;9636;9637;9638;9639;9640;9641;9642;9767;9768;10449;11041;11059;11060;11061;11062;12294;12295;12296;12770;12771;12772;12773;12774	1484;1753;2354;3389;3705;3766;3832;3837;4513;5163;5899;6212;6214;8042;8207;8644;8647;8918;8979;9264;9635;9641;9767;10449;11041;11060;12294;12296;12772	116;117;118;119;120;121;122;123		234;245;269;276;286;296;326;411
P35573	P35573	4	4	4	Glycogen debranching enzyme;4-alpha-glucanotransferase;Amylo-alpha-1,6-glucosidase	AGL	sp|P35573|GDE_HUMAN Glycogen debranching enzyme OS=Homo sapiens OX=9606 GN=AGL PE=1 SV=3	1	4	4	4	3.5	3.5	3.5	174.76	1532	1532	0	1.7651	8563700	3				512	2386;3219;3509;5376	True;True;True;True	2442;3291;3589;5489	3179;4330;4746;7249	3312;4505;4931;7525	3312;4505;4931;7525
P35579;P35580;P35749	P35579	44;6;2	44;6;2	43;6;1	Myosin-9	MYH9	sp|P35579|MYH9_HUMAN Myosin-9 OS=Homo sapiens OX=9606 GN=MYH9 PE=1 SV=4	3	44	44	43	32	32	31.2	226.53	1960	1960;1976;1972	0	323.31	1191700000	47				513	105;301;411;1019;1127;1382;1783;1794;1930;1931;2331;3344;3345;3416;3441;3442;3642;3775;3946;4181;4196;4230;4265;4510;4580;4837;5222;5235;5360;5571;5838;5957;5991;6266;6350;6410;6894;7118;7122;7861;8181;8372;8375;8691	True;True;True;True;True;True;True;True;True;True;True;True;True;True;True;True;True;True;True;True;True;True;True;True;True;True;True;True;True;True;True;True;True;True;True;True;True;True;True;True;True;True;True;True	106;311;424;1042;1150;1417;1822;1833;1972;1973;2384;3421;3422;3496;3521;3522;3722;3861;4034;4272;4287;4321;4357;4606;4679;4939;5334;5347;5473;5686;5971;6092;6126;6409;6495;6555;7064;7297;7301;8073;8406;8601;8604;8926	133;393;394;544;1359;1484;1833;2378;2391;2570;2571;3097;4518;4519;4520;4521;4637;4672;4673;4912;5089;5303;5617;5636;5680;5681;5731;5732;6073;6181;6507;7059;7074;7232;7505;7864;8023;8074;8075;8512;8635;8636;8722;8723;9385;9730;9734;10761;11210;11468;11471;11878;11879	136;403;404;557;1404;1529;1898;2462;2477;2676;2677;3224;4697;4698;4699;4700;4818;4857;4858;5102;5282;5507;5824;5843;5887;5888;5889;5940;5941;6298;6413;6753;7331;7346;7508;7788;8157;8323;8383;8384;8866;8992;8993;9079;9080;9764;10133;10137;11219;11688;11956;11959;12376;12377	136;403;557;1404;1529;1898;2462;2477;2676;2677;3224;4697;4698;4818;4857;4858;5102;5282;5507;5824;5843;5888;5941;6298;6413;6753;7331;7346;7508;7788;8157;8323;8383;8866;8993;9080;9764;10133;10137;11219;11688;11956;11959;12377
P35606	P35606	3	3	3	Coatomer subunit beta	COPB2	sp|P35606|COPB2_HUMAN Coatomer subunit beta OS=Homo sapiens OX=9606 GN=COPB2 PE=1 SV=2	1	3	3	3	6.1	6.1	6.1	102.49	906	906	0	3.0973	25961000	2				514	3094;6864;8316	True;True;True	3165;7030;8545	4162;9345;11392	4332;9721;11878	4332;9721;11878
P35610	P35610	3	3	3	Sterol O-acyltransferase 1	SOAT1	sp|P35610|SOAT1_HUMAN Sterol O-acyltransferase 1 OS=Homo sapiens OX=9606 GN=SOAT1 PE=1 SV=3	1	3	3	3	9.3	9.3	9.3	64.734	550	550	0	4.0495	15514000	3				515	2060;5342;6763	True;True;True	2107;5455;6925	2744;7210;9214	2853;7486;9585	2853;7486;9585
P35611	P35611	8	8	8	Alpha-adducin	ADD1	sp|P35611|ADDA_HUMAN Alpha-adducin OS=Homo sapiens OX=9606 GN=ADD1 PE=1 SV=2	1	8	8	8	17.6	17.6	17.6	80.954	737	737	0	51.889	203020000	8				516	911;3043;3807;7113;7446;7705;7922;8939	True;True;True;True;True;True;True;True	934;3114;3895;7292;7638;7911;8139;9175	1217;4093;4094;5132;9723;10159;10556;10845;12180	1250;4260;4261;5326;10125;10587;11005;11303;12681	1250;4260;5326;10125;10587;11005;11303;12681
P35637	P35637	11	11	9	RNA-binding protein FUS	FUS	sp|P35637|FUS_HUMAN RNA-binding protein FUS OS=Homo sapiens OX=9606 GN=FUS PE=1 SV=1	1	11	11	9	22.8	22.8	22.8	53.425	526	526	0	246.98	24639000000	45				517	41;43;567;896;1625;2613;3180;4300;4851;7619;7620	True;True;True;True;True;True;True;True;True;True;True	42;44;581;582;918;919;1663;2673;3251;4393;4394;4953;7823;7824;7825	49;50;51;58;59;60;61;733;734;735;736;737;738;739;1192;1193;1194;1195;2174;3475;3476;4270;4271;4272;4273;5788;5789;5790;5791;6532;6533;6534;6535;6536;6537;6538;6539;10423;10424;10425;10426;10427	50;51;52;59;60;61;62;748;749;750;751;752;753;754;1225;1226;1227;1228;2254;3614;3615;3616;4444;4445;4446;4447;5999;6000;6001;6002;6779;6780;6781;6782;6783;6784;6785;6786;6787;6788;6789;10864;10865;10866;10867;10868	51;62;753;1226;2254;3614;4447;6001;6781;10864;10868	124;125;126		321;436;464
P35658	P35658	2	2	2	Nuclear pore complex protein Nup214	NUP214	sp|P35658|NU214_HUMAN Nuclear pore complex protein Nup214 OS=Homo sapiens OX=9606 GN=NUP214 PE=1 SV=2	1	2	2	2	2.1	2.1	2.1	213.62	2090	2090	0	7.1666	35237000	3				518	3205;4669	True;True	3277;4770	4310;6310;6311	4484;6547;6548	4484;6547
P35869	P35869	2	2	2	Aryl hydrocarbon receptor	AHR	sp|P35869|AHR_HUMAN Aryl hydrocarbon receptor OS=Homo sapiens OX=9606 GN=AHR PE=1 SV=2	1	2	2	2	4.1	4.1	4.1	96.146	848	848	0	7.0502	71839000	2				519	1084;4434	True;True	1107;4530	1434;5979	1479;6198	1479;6198
P35908	P35908	43	1	1	Keratin, type II cytoskeletal 2 epidermal	KRT2	sp|P35908|K22E_HUMAN Keratin, type II cytoskeletal 2 epidermal OS=Homo sapiens OX=9606 GN=KRT2 PE=1 SV=2	1	43	1	1	78.4	4.7	4.7	65.432	639	639	0	4.0663	22804000	1				520	643;1372;1434;2129;2130;2219;2220;2307;2690;2719;2745;2749;3039;3211;3522;4206;4340;4394;4916;5727;5914;5936;5937;6127;6196;6197;6970;6986;6987;7110;7345;7430;7431;7754;7913;7914;8157;8524;8893;9017;9018;9024;9127	False;False;False;False;False;False;False;False;False;True;False;False;False;False;False;False;False;False;False;False;False;False;False;False;False;False;False;False;False;False;False;False;False;False;False;False;False;False;False;False;False;False;False	660;1407;1470;1471;2179;2180;2269;2270;2360;2751;2781;2811;2816;3110;3283;3602;4297;4434;4489;5022;5852;5853;6048;6070;6071;6266;6337;6338;7144;7160;7161;7289;7536;7622;7623;7962;8129;8130;8131;8382;8755;8756;9128;9129;9255;9256;9262;9366	842;1823;1898;1899;2835;2836;2837;2838;2957;2958;2959;2960;3067;3577;3615;3679;3689;4089;4320;4763;5648;5853;5854;5925;6661;7717;7718;7963;7998;7999;8280;8281;8369;8370;8371;9507;9508;9530;9531;9720;10034;10135;10136;10137;10616;10617;10830;10831;10832;10833;11180;11181;11674;11675;12123;12124;12292;12293;12294;12304;12433	863;1888;1966;1967;2952;2953;2954;2955;2956;3081;3082;3083;3084;3194;3720;3761;3831;3842;4256;4494;4948;5855;6066;6067;6143;6922;8006;8007;8008;8263;8298;8299;8607;8608;8700;8701;8702;9899;9900;9922;9923;10122;10457;10562;10563;10564;11066;11067;11288;11289;11290;11291;11656;11657;11658;12168;12169;12170;12623;12624;12797;12798;12799;12811;12812;12944	863;1888;1966;2954;2956;3082;3084;3194;3720;3761;3831;3842;4256;4494;4948;5855;6066;6143;6922;8006;8263;8298;8299;8608;8700;8702;9899;9922;9923;10122;10457;10562;10564;11066;11288;11291;11656;12168;12623;12797;12798;12812;12944	49;50;51;52;53;54		216;257;294;337;467;491
P36542	P36542	4	4	4	ATP synthase subunit gamma, mitochondrial	ATP5C1	sp|P36542|ATPG_HUMAN ATP synthase subunit gamma, mitochondrial OS=Homo sapiens OX=9606 GN=ATP5F1C PE=1 SV=1	1	4	4	4	13.8	13.8	13.8	32.996	298	298	0	3.7318	23116000	4				521	2070;2829;4035;5380	True;True;True;True	2117;2896;4123;5493	2756;3802;5418;7254	2865;3957;5624;7530	2865;3957;5624;7530
P36551	P36551	1	1	1	Oxygen-dependent coproporphyrinogen-III oxidase, mitochondrial	CPOX	sp|P36551|HEM6_HUMAN Oxygen-dependent coproporphyrinogen-III oxidase, mitochondrial OS=Homo sapiens OX=9606 GN=CPOX PE=1 SV=3	1	1	1	1	2.9	2.9	2.9	50.151	454	454	0	3.9001	5785700	0				522	3532	TRUE	3612	4774	4959	4959
P36578	P36578	9	9	9	60S ribosomal protein L4	RPL4	sp|P36578|RL4_HUMAN 60S ribosomal protein L4 OS=Homo sapiens OX=9606 GN=RPL4 PE=1 SV=5	1	9	9	9	23.7	23.7	23.7	47.697	427	427	0	10.536	99933000	7				523	2;565;2144;3507;3508;5898;6136;6206;6610	True;True;True;True;True;True;True;True;True	2;579;2194;3587;3588;6032;6276;6348;6761	2;731;2856;4744;4745;7943;8297;8384;9001	2;746;2975;4929;4930;8243;8625;8716;9368	2;746;2975;4929;4930;8243;8625;8716;9368
P36873;P62136	P36873;P62136	9;9	1;1	1;1	Serine/threonine-protein phosphatase PP1-gamma catalytic subunit;Serine/threonine-protein phosphatase PP1-alpha catalytic subunit	PPP1CC;PPP1CA	sp|P36873|PP1G_HUMAN Serine/threonine-protein phosphatase PP1-gamma catalytic subunit OS=Homo sapiens OX=9606 GN=PPP1CC PE=1 SV=1;sp|P62136|PP1A_HUMAN Serine/threonine-protein phosphatase PP1-alpha catalytic subunit OS=Homo sapiens OX=9606 GN=PPP1CA PE=1 S	2	9	1	1	32.2	4.3	4.3	36.983	323	323;330	0	6.0054	66926000	2				524	325;1707;3464;3548;3687;4034;7235;7582;9183	False;False;True;False;False;False;False;False;False	336;1745;3544;3628;3770;4122;7420;7784;9423	426;2275;2276;4695;4696;4793;4794;4976;5417;9887;10363;10364;12497	436;2357;2358;4880;4881;4978;4979;5167;5623;10300;10802;10803;13009	436;2357;4881;4978;5167;5623;10300;10802;13009
P36957	P36957	2	2	2	Dihydrolipoyllysine-residue succinyltransferase component of 2-oxoglutarate dehydrogenase complex, mitochondrial	DLST	sp|P36957|ODO2_HUMAN Dihydrolipoyllysine-residue succinyltransferase component of 2-oxoglutarate dehydrogenase complex, mitochondrial OS=Homo sapiens OX=9606 GN=DLST PE=1 SV=4	1	2	2	2	6.4	6.4	6.4	48.755	453	453	0	12.595	17175000	2				525	649;2897	True;True	666;2965	850;3904	871;4065	871;4065
P37108	P37108	3	3	3	Signal recognition particle 14 kDa protein	SRP14	sp|P37108|SRP14_HUMAN Signal recognition particle 14 kDa protein OS=Homo sapiens OX=9606 GN=SRP14 PE=1 SV=2	1	3	3	3	25	25	25	14.57	136	136	0	48.478	159830000	3				526	2398;7891;8472	True;True;True	2454;8106;8703	3192;10802;11615	3325;11260;12109	3325;11260;12109
P37268	P37268	2	2	2	Squalene synthase	FDFT1	sp|P37268|FDFT_HUMAN Squalene synthase OS=Homo sapiens OX=9606 GN=FDFT1 PE=1 SV=1	1	2	2	2	6.7	6.7	6.7	48.115	417	417	0	7.4314	7926300	2				527	4634;9207	True;True	4734;9449	6247;12529	6481;13044	6481;13044
P38159;Q96E39;O75526;Q8N7X1	P38159;Q96E39	6;4;2;1	6;4;2;1	6;4;2;1	RNA-binding motif protein, X chromosome;RNA-binding motif protein, X chromosome, N-terminally processed;RNA binding motif protein, X-linked-like-1	RBMX;RBMXL1	sp|P38159|RBMX_HUMAN RNA-binding motif protein, X chromosome OS=Homo sapiens OX=9606 GN=RBMX PE=1 SV=3;sp|Q96E39|RMXL1_HUMAN RNA binding motif protein, X-linked-like-1 OS=Homo sapiens OX=9606 GN=RBMXL1 PE=1 SV=1	4	6	6	6	19.9	19.9	19.9	42.331	391	391;390;392;1067	0	36.655	227060000	8				528	1296;1339;2648;2728;3987;8203	True;True;True;True;True;True	1327;1371;2708;2790;4075;8429	1716;1717;1774;3521;3626;3627;5356;11238	1775;1776;1834;3661;3772;3773;5560;11716	1776;1834;3661;3773;5560;11716
P38646	P38646	25	25	25	Stress-70 protein, mitochondrial	HSPA9	sp|P38646|GRP75_HUMAN Stress-70 protein, mitochondrial OS=Homo sapiens OX=9606 GN=HSPA9 PE=1 SV=2	1	25	25	25	45.5	45.5	45.5	73.68	679	679	0	292.27	1556100000	32				529	523;600;862;928;1940;1941;1960;2003;2574;4291;4600;4954;5521;5573;5650;5791;6274;6733;6796;7226;7339;8180;8360;8441;8651	True;True;True;True;True;True;True;True;True;True;True;True;True;True;True;True;True;True;True;True;True;True;True;True;True	537;616;883;951;1982;1983;2003;2047;2634;4384;4699;5061;5635;5688;5772;5924;6417;6894;6958;7410;7530;8405;8589;8672;8885	682;783;1150;1244;2581;2582;2583;2616;2669;3428;5776;5777;6204;6709;6710;6711;7437;7507;7508;7617;7618;7804;8525;9180;9255;9871;9872;10027;11209;11453;11570;11826	697;798;1181;1282;2687;2688;2689;2722;2775;3566;5987;5988;6437;6970;6971;6972;6973;7719;7790;7791;7903;7904;8097;8879;9550;9627;10283;10284;10450;11687;11940;12064;12323	697;798;1181;1282;2687;2689;2722;2775;3566;5987;6437;6971;7719;7791;7904;8097;8879;9550;9627;10283;10450;11687;11940;12064;12323
P38919	P38919	11	10	10	Eukaryotic initiation factor 4A-III;Eukaryotic initiation factor 4A-III, N-terminally processed	EIF4A3	sp|P38919|IF4A3_HUMAN Eukaryotic initiation factor 4A-III OS=Homo sapiens OX=9606 GN=EIF4A3 PE=1 SV=4	1	11	10	10	38.4	34.5	34.5	46.871	411	411	0	21.02	253450000	10				530	987;1088;1376;1485;1770;2023;2812;2857;4193;5682;8467	True;True;True;True;True;True;False;True;True;True;True	1010;1111;1411;1522;1809;2068;2879;2925;4284;5805;8698	1321;1441;1827;1963;1964;2364;2694;3781;3838;5633;7658;11609	1360;1486;1892;2035;2036;2448;2801;3936;3993;5840;7946;12103	1360;1486;1892;2036;2448;2801;3936;3993;5840;7946;12103
P39019	P39019	8	8	8	40S ribosomal protein S19	RPS19	sp|P39019|RS19_HUMAN 40S ribosomal protein S19 OS=Homo sapiens OX=9606 GN=RPS19 PE=1 SV=2	1	8	8	8	42.8	42.8	42.8	16.06	145	145	0	26.793	569300000	10				531	387;1389;1767;3247;4867;5861;6724;8488	True;True;True;True;True;True;True;True	400;1424;1806;3321;4970;5994;6885;8719	514;1840;2360;4371;6573;6574;7892;9169;9170;11633	526;1906;2444;4547;6830;6831;8187;9539;9540;12127	526;1906;2444;4547;6831;8187;9540;12127
P39023;Q92901	P39023	12;1	12;1	12;1	60S ribosomal protein L3	RPL3	sp|P39023|RL3_HUMAN 60S ribosomal protein L3 OS=Homo sapiens OX=9606 GN=RPL3 PE=1 SV=2	2	12	12	12	35.5	35.5	35.5	46.108	403	403;407	0	41.291	449560000	16				532	979;1955;3222;4058;4307;4571;6004;6873;6965;7979;8073;9000	True;True;True;True;True;True;True;True;True;True;True;True	1002;1998;3294;4146;4401;4668;6141;7040;7138;7139;8199;8296;9238	1307;1308;1309;2607;4333;5445;5798;6160;8097;9356;9500;9501;9502;10933;10934;11072;12272	1346;1347;1348;2713;4508;5651;6009;6390;8407;9734;9892;9893;9894;11397;11398;11544;12776	1346;2713;4508;5651;6009;6390;8407;9734;9894;11397;11544;12776	127		332
P39656	P39656	2	2	2	Dolichyl-diphosphooligosaccharide--protein glycosyltransferase 48 kDa subunit	DDOST	sp|P39656|OST48_HUMAN Dolichyl-diphosphooligosaccharide--protein glycosyltransferase 48 kDa subunit OS=Homo sapiens OX=9606 GN=DDOST PE=1 SV=4	1	2	2	2	4.6	4.6	4.6	50.8	456	456	0	3.0842	9112800	2				533	7783;8960	True;True	7992;9196	10658;12204	11114;12707	11114;12707
P39687;Q92688	P39687;Q92688	1;1	1;1	1;1	Acidic leucine-rich nuclear phosphoprotein 32 family member A;Acidic leucine-rich nuclear phosphoprotein 32 family member B	ANP32A;ANP32B	sp|P39687|AN32A_HUMAN Acidic leucine-rich nuclear phosphoprotein 32 family member A OS=Homo sapiens OX=9606 GN=ANP32A PE=1 SV=1;sp|Q92688|AN32B_HUMAN Acidic leucine-rich nuclear phosphoprotein 32 family member B OS=Homo sapiens OX=9606 GN=ANP32B PE=1 SV=1	2	1	1	1	6.4	6.4	6.4	28.585	249	249;251	0	15.875	9595000	1				534	7014	TRUE	7189	9584	9976	9976
P39748	P39748	3	3	3	Flap endonuclease 1	FEN1	sp|P39748|FEN1_HUMAN Flap endonuclease 1 OS=Homo sapiens OX=9606 GN=FEN1 PE=1 SV=1	1	3	3	3	12.4	12.4	12.4	42.592	380	380	0	14.278	39456000	4				535	1467;4213;6632	True;True;True	1504;4304;6784	1941;1942;5656;9035	2013;2014;5863;9402	2013;5863;9402
P40222	P40222	3	3	3	Alpha-taxilin	TXLNA	sp|P40222|TXLNA_HUMAN Alpha-taxilin OS=Homo sapiens OX=9606 GN=TXLNA PE=1 SV=3	1	3	3	3	11.2	11.2	11.2	61.89	546	546	0	13.82	49855000	4				536	4784;8635;8726	True;True;True	4886;8869;8961	6447;6448;11809;11918	6691;6692;12306;12416	6691;12306;12416
P40227	P40227	7	7	6	T-complex protein 1 subunit zeta	CCT6A	sp|P40227|TCPZ_HUMAN T-complex protein 1 subunit zeta OS=Homo sapiens OX=9606 GN=CCT6A PE=1 SV=3	1	7	7	6	26	26	23.5	58.024	531	531	0	34.124	115150000	7				537	617;1049;5779;6252;8105;8301;8414	True;True;True;True;True;True;True	633;1072;5912;6395;8328;8530;8645	807;1395;7790;7791;8489;11113;11114;11369;11539	822;1440;8083;8084;8840;11586;11587;11854;12032	822;1440;8084;8840;11587;11854;12032
P40429;Q6NVV1	P40429	3;1	3;1	3;1	60S ribosomal protein L13a	RPL13A	sp|P40429|RL13A_HUMAN 60S ribosomal protein L13a OS=Homo sapiens OX=9606 GN=RPL13A PE=1 SV=2	2	3	3	3	13.8	13.8	13.8	23.577	203	203;102	0	7.5491	161820000	3				538	200;9123;9193	True;True;True	207;9362;9434	265;12429;12510	269;12940;13023	269;12940;13023
P40616	P40616	1	1	1	ADP-ribosylation factor-like protein 1	ARL1	sp|P40616|ARL1_HUMAN ADP-ribosylation factor-like protein 1 OS=Homo sapiens OX=9606 GN=ARL1 PE=1 SV=1	1	1	1	1	7.7	7.7	7.7	20.417	181	181	0	2.6272	8466300	1				539	6835	TRUE	7001	9309	9682	9682
P40925	P40925	1	1	1	Malate dehydrogenase, cytoplasmic	MDH1	sp|P40925|MDHC_HUMAN Malate dehydrogenase, cytoplasmic OS=Homo sapiens OX=9606 GN=MDH1 PE=1 SV=4	1	1	1	1	3.9	3.9	3.9	36.426	334	334	0.0049681	0.66185	10222000	1				540	1377	TRUE	1412	1828	1893	1893
P40937	P40937	5	5	5	Replication factor C subunit 5	RFC5	sp|P40937|RFC5_HUMAN Replication factor C subunit 5 OS=Homo sapiens OX=9606 GN=RFC5 PE=1 SV=1	1	5	5	5	23.5	23.5	23.5	38.496	340	340	0	14.859	72696000	4				541	2236;3859;4551;8729;9212	True;True;True;True;True	2286;3947;4648;8964;9454	2980;5192;6137;11921;12535	3105;5388;6367;12419;13050	3105;5388;6367;12419;13050
P40938	P40938	2	2	2	Replication factor C subunit 3	RFC3	sp|P40938|RFC3_HUMAN Replication factor C subunit 3 OS=Homo sapiens OX=9606 GN=RFC3 PE=1 SV=2	1	2	2	2	7.6	7.6	7.6	40.556	356	356	0	2.8525	9453600	2				542	8576;8819	True;True	8810;9053	11737;12029	12233;12527	12233;12527
P40939	P40939	6	6	6	Trifunctional enzyme subunit alpha, mitochondrial;Long-chain enoyl-CoA hydratase;Long chain 3-hydroxyacyl-CoA dehydrogenase	HADHA	sp|P40939|ECHA_HUMAN Trifunctional enzyme subunit alpha, mitochondrial OS=Homo sapiens OX=9606 GN=HADHA PE=1 SV=2	1	6	6	6	15.2	15.2	15.2	82.999	763	763	0	72.873	63585000	7				543	1193;1319;4192;5618;7763;7995	True;True;True;True;True;True	1219;1350;4283;5737;7971;8215	1579;1747;5632;7572;10627;10957;10958	1629;1806;5839;7858;11077;11423;11424	1629;1806;5839;7858;11077;11423
P41091;Q2VIR3	P41091;Q2VIR3	11;9	11;9	11;9	Eukaryotic translation initiation factor 2 subunit 3;Putative eukaryotic translation initiation factor 2 subunit 3-like protein	EIF2S3;EIF2S3L	sp|P41091|IF2G_HUMAN Eukaryotic translation initiation factor 2 subunit 3 OS=Homo sapiens OX=9606 GN=EIF2S3 PE=1 SV=3;sp|Q2VIR3|IF2GL_HUMAN Eukaryotic translation initiation factor 2 subunit 3B OS=Homo sapiens OX=9606 GN=EIF2S3B PE=2 SV=2	2	11	11	11	32.4	32.4	32.4	51.109	472	472;472	0	97.835	553320000	15				544	267;1024;3108;3488;4002;4014;6268;6285;6776;6854;8282	True;True;True;True;True;True;True;True;True;True;True	276;277;1047;3179;3568;4090;4102;6411;6429;6938;7020;8509	352;353;354;355;1365;4178;4725;5377;5389;5390;8515;8516;8545;9230;9333;11345	362;363;364;365;1410;4348;4910;5582;5594;5595;8869;8870;8901;9602;9708;11829	363;1410;4348;4910;5582;5595;8869;8901;9602;9708;11829
P41214	P41214	2	2	2	Eukaryotic translation initiation factor 2D	EIF2D	sp|P41214|EIF2D_HUMAN Eukaryotic translation initiation factor 2D OS=Homo sapiens OX=9606 GN=EIF2D PE=1 SV=3	1	2	2	2	8.6	8.6	8.6	64.706	584	584	0	3.2086	15355000	2				545	143;3972	True;True	146;4060	188;5337	191;5541	191;5541
P41229	P41229	6	6	6	Lysine-specific demethylase 5C	KDM5C	sp|P41229|KDM5C_HUMAN Lysine-specific demethylase 5C OS=Homo sapiens OX=9606 GN=KDM5C PE=1 SV=2	1	6	6	6	6.3	6.3	6.3	175.72	1560	1560	0	9.9081	26351000	6				546	588;1166;1456;1475;6261;8076	True;True;True;True;True;True	604;1191;1493;1512;6404;8299	770;1544;1928;1950;8504;11075	785;1591;1999;2022;8856;11547	785;1591;1999;2022;8856;11547
P41250	P41250	9	9	9	Glycine--tRNA ligase	GARS	sp|P41250|GARS_HUMAN Glycine--tRNA ligase OS=Homo sapiens OX=9606 GN=GARS PE=1 SV=3	1	9	9	9	21.4	21.4	21.4	83.165	739	739	0	41.022	132960000	11				547	173;3789;4040;4661;7168;7572;7573;7792;8601	True;True;True;True;True;True;True;True;True	178;3877;4128;4762;7351;7773;7774;8001;8835	230;5110;5424;6298;6299;9800;10347;10348;10668;10669;11765	233;5303;5630;6533;6534;10209;10786;10787;11124;11125;12262	233;5303;5630;6534;10209;10786;10787;11124;12262
P41252	P41252	30	30	30	Isoleucine--tRNA ligase, cytoplasmic	IARS	sp|P41252|SYIC_HUMAN Isoleucine--tRNA ligase, cytoplasmic OS=Homo sapiens OX=9606 GN=IARS PE=1 SV=2	1	30	30	30	34.7	34.7	34.7	144.5	1262	1262	0	275.97	1239800000	38				548	1325;1610;1731;2246;2462;3898;4075;4089;4299;4617;4964;5044;5198;5511;6005;6092;6117;6148;6422;7397;7554;7624;8033;8130;8461;8544;8907;8974;9104;9211	True;True;True;True;True;True;True;True;True;True;True;True;True;True;True;True;True;True;True;True;True;True;True;True;True;True;True;True;True;True	1357;1648;1769;2298;2519;3986;4163;4178;4392;4716;5071;5153;5309;5625;6142;6231;6256;6288;6567;7589;7754;7829;8256;8353;8692;8778;9143;9210;9343;9453	1757;1758;2156;2306;2307;2995;2996;3272;3273;5242;5243;5465;5488;5787;6223;6723;6818;7010;7011;7423;8098;8233;8234;8266;8309;8739;10097;10325;10431;10432;10433;11024;11143;11597;11598;11699;12143;12226;12404;12533;12534	1817;1818;2235;2389;2390;3121;3122;3409;3410;5440;5441;5671;5694;5998;6457;6985;7080;7280;7281;7705;8408;8557;8558;8591;8639;9096;10522;10763;10872;10873;10874;11495;11617;12091;12092;12194;12643;12730;12915;13048;13049	1817;2235;2389;3121;3410;5440;5671;5694;5998;6457;6985;7080;7280;7705;8408;8558;8591;8639;9096;10522;10763;10874;11495;11617;12092;12194;12643;12730;12915;13049
P42166	P42166	24	24	17	Lamina-associated polypeptide 2, isoform alpha;Thymopoietin;Thymopentin	TMPO	sp|P42166|LAP2A_HUMAN Lamina-associated polypeptide 2, isoform alpha OS=Homo sapiens OX=9606 GN=TMPO PE=1 SV=2	1	24	24	17	59.7	59.7	45.4	75.491	694	694	0	260.07	1406300000	32				549	406;522;836;1120;1123;1316;1407;1444;1902;2954;3469;4062;4863;5525;6179;6499;6836;7293;7300;8025;8036;8139;8336;9077	True;True;True;True;True;True;True;True;True;True;True;True;True;True;True;True;True;True;True;True;True;True;True;True	419;536;856;1143;1146;1347;1442;1481;1943;3024;3549;4150;4966;5639;6320;6646;7002;7482;7491;8248;8259;8363;8565;9316	537;538;680;681;1115;1474;1478;1479;1742;1743;1861;1915;2529;3986;3987;4701;4702;5450;6568;7442;8349;8850;8851;9310;9965;9966;9979;11013;11014;11027;11028;11155;11421;12374	550;551;695;696;1145;1519;1523;1524;1801;1802;1927;1986;2627;4148;4149;4886;4887;5656;6825;7724;8680;9213;9214;9683;10384;10385;10399;11483;11484;11498;11499;11629;11907;12884	550;695;1145;1519;1524;1801;1927;1986;2627;4148;4886;5656;6825;7724;8680;9214;9683;10385;10399;11483;11498;11629;11907;12884
P42167	P42167	11	4	4	Lamina-associated polypeptide 2, isoforms beta/gamma;Thymopoietin;Thymopentin	TMPO	sp|P42167|LAP2B_HUMAN Lamina-associated polypeptide 2, isoforms beta/gamma OS=Homo sapiens OX=9606 GN=TMPO PE=1 SV=2	1	11	4	4	40.5	18.7	18.7	50.67	454	454	0	43.298	138340000	6				550	1407;1866;2954;3165;3476;4863;6179;6836;7300;8191;9077	False;True;False;True;True;False;False;False;False;True;False	1442;1907;3024;3236;3556;4966;6320;7002;7491;8416;9316	1861;2487;3986;3987;4251;4252;4712;4713;6568;8349;9310;9979;11222;12374	1927;2583;4148;4149;4424;4425;4897;4898;6825;8680;9683;10399;11700;12884	1927;2583;4148;4425;4897;6825;8680;9683;10399;11700;12884
P42224	P42224	1	1	1	Signal transducer and activator of transcription 1-alpha/beta	STAT1	sp|P42224|STAT1_HUMAN Signal transducer and activator of transcription 1-alpha/beta OS=Homo sapiens OX=9606 GN=STAT1 PE=1 SV=2	1	1	1	1	2.1	2.1	2.1	87.334	750	750	0	6.0659	11506000	1				551	4953	TRUE	5060	6708	6969	6969
P42285	P42285	3	3	3	Superkiller viralicidic activity 2-like 2	SKIV2L2	sp|P42285|MTREX_HUMAN Exosome RNA helicase MTR4 OS=Homo sapiens OX=9606 GN=MTREX PE=1 SV=3	1	3	3	3	5.4	5.4	5.4	117.8	1042	1042	0	6.8774	13401000	2				552	101;1368;5751	True;True;True	102;1403;5882	129;1819;7756	132;1884;8049	132;1884;8049
Q71UM5;P42677	Q71UM5;P42677	1;1	1;1	1;1	40S ribosomal protein S27-like;40S ribosomal protein S27	RPS27L;RPS27	sp|Q71UM5|RS27L_HUMAN 40S ribosomal protein S27-like OS=Homo sapiens OX=9606 GN=RPS27L PE=1 SV=3;sp|P42677|RS27_HUMAN 40S ribosomal protein S27 OS=Homo sapiens OX=9606 GN=RPS27 PE=1 SV=3	2	1	1	1	9.5	9.5	9.5	9.4771	84	84;84	0.0081967	0.52901	8623600	1				553	5358	TRUE	5471	7230	7506	7506
P42694	P42694	1	1	1	Probable helicase with zinc finger domain	HELZ	sp|P42694|HELZ_HUMAN Probable helicase with zinc finger domain OS=Homo sapiens OX=9606 GN=HELZ PE=1 SV=2	1	1	1	1	0.8	0.8	0.8	218.97	1942	1942	0	1.8567	4588800	1				554	5402	TRUE	5515	7282	7558	7558
P42695	P42695	8	8	8	Condensin-2 complex subunit D3	NCAPD3	sp|P42695|CNDD3_HUMAN Condensin-2 complex subunit D3 OS=Homo sapiens OX=9606 GN=NCAPD3 PE=1 SV=2	1	8	8	8	8.9	8.9	8.9	168.89	1498	1498	0	19.453	46400000	8				555	2849;3926;6759;6841;7205;7562;9102;9108	True;True;True;True;True;True;True;True	2917;4014;6921;7007;7389;7763;9341;9347	3828;5277;9209;9317;9847;10336;12402;12408	3983;5477;9580;9690;10259;10775;12913;12919	3983;5477;9580;9690;10259;10775;12913;12919
P42702	P42702	1	1	1	Leukemia inhibitory factor receptor	LIFR	sp|P42702|LIFR_HUMAN Leukemia inhibitory factor receptor OS=Homo sapiens OX=9606 GN=LIFR PE=1 SV=1	1	1	1	1	1.2	1.2	1.2	123.74	1097	1097	0.0056298	0.6352	0	1				556	740	TRUE	758	981	1007	1007
P42704	P42704	17	17	17	Leucine-rich PPR motif-containing protein, mitochondrial	LRPPRC	sp|P42704|LPPRC_HUMAN Leucine-rich PPR motif-containing protein, mitochondrial OS=Homo sapiens OX=9606 GN=LRPPRC PE=1 SV=3	1	17	17	17	18.1	18.1	18.1	157.9	1394	1394	0	90.081	245520000	16				557	931;2905;3179;4659;4772;4875;5752;6011;6128;6247;6811;6898;7143;7270;7380;7686;8337	True;True;True;True;True;True;True;True;True;True;True;True;True;True;True;True;True	954;2974;3250;4760;4874;4978;5883;6148;6267;6389;6977;7068;7325;7457;7572;7891;8566	1247;3919;4269;6295;6296;6432;6584;7757;8104;8282;8480;9282;9390;9771;9936;10078;10525;11422	1285;4080;4443;6530;6531;6674;6841;8050;8415;8609;8830;9654;9769;10178;10353;10502;10972;11908	1285;4080;4443;6530;6674;6841;8050;8415;8609;8830;9654;9769;10178;10353;10502;10972;11908
P43003	P43003	1	1	1	Excitatory amino acid transporter 1	SLC1A3	sp|P43003|EAA1_HUMAN Excitatory amino acid transporter 1 OS=Homo sapiens OX=9606 GN=SLC1A3 PE=1 SV=1	1	1	1	1	2.2	2.2	2.2	59.572	542	542	0	3.0654	11264000	1				558	8715	TRUE	8950	11907	12405	12405
P43007	P43007	1	1	1	Neutral amino acid transporter A	SLC1A4	sp|P43007|SATT_HUMAN Neutral amino acid transporter A OS=Homo sapiens OX=9606 GN=SLC1A4 PE=1 SV=1	1	1	1	1	2.4	2.4	2.4	55.722	532	532	0	1.9745	3825100	1				559	5946	TRUE	6081	8010	8310	8310
P43034	P43034	2	2	2	Platelet-activating factor acetylhydrolase IB subunit alpha	PAFAH1B1	sp|P43034|LIS1_HUMAN Platelet-activating factor acetylhydrolase IB subunit alpha OS=Homo sapiens OX=9606 GN=PAFAH1B1 PE=1 SV=2	1	2	2	2	7.1	7.1	7.1	46.637	410	410	0	2.2854	11326000	2				560	1455;7749	True;True	1492;7956	1927;10607	1998;11057	1998;11057
P43243	P43243	16	16	16	Matrin-3	MATR3	sp|P43243|MATR3_HUMAN Matrin-3 OS=Homo sapiens OX=9606 GN=MATR3 PE=1 SV=2	1	16	16	16	30.5	30.5	30.5	94.622	847	847	0	66.874	699990000	23				561	1206;1523;2563;2952;2963;3153;3596;3966;4435;4477;6572;6875;7523;8349;8807;9205	True;True;True;True;True;True;True;True;True;True;True;True;True;True;True;True	1232;1560;2623;3022;3033;3224;3676;4054;4531;4573;6722;7042;7720;8578;9041;9447	1595;1596;2014;3414;3984;3996;3997;4233;4234;4235;4856;5329;5330;5980;6030;8951;9358;10276;11438;11439;12016;12017;12527	1645;1646;2088;3552;4146;4158;4159;4405;4406;4407;5041;5042;5533;5534;6199;6253;9317;9736;10712;11925;11926;12514;12515;13042	1646;2088;3552;4146;4159;4406;5041;5533;6199;6253;9317;9736;10712;11926;12514;13042		18		188
P43246	P43246	1	1	1	DNA mismatch repair protein Msh2	MSH2	sp|P43246|MSH2_HUMAN DNA mismatch repair protein Msh2 OS=Homo sapiens OX=9606 GN=MSH2 PE=1 SV=1	1	1	1	1	1.5	1.5	1.5	104.74	934	934	0	2.8108	3187600	1				562	5100	TRUE	5209	6884	7149	7149
P43307	P43307	1	1	1	Translocon-associated protein subunit alpha	SSR1	sp|P43307|SSRA_HUMAN Translocon-associated protein subunit alpha OS=Homo sapiens OX=9606 GN=SSR1 PE=1 SV=3	1	1	1	1	5.2	5.2	5.2	32.235	286	286	0	5.1609	10212000	1				563	3056	TRUE	3127	4118	4286	4286
P43490	P43490	3	3	3	Nicotinamide phosphoribosyltransferase	NAMPT	sp|P43490|NAMPT_HUMAN Nicotinamide phosphoribosyltransferase OS=Homo sapiens OX=9606 GN=NAMPT PE=1 SV=1	1	3	3	3	11.6	11.6	11.6	55.52	491	491	0	10.096	24670000	3				564	1406;5787;7818	True;True;True	1441;5920;8028	1860;7800;10702	1926;8093;11159	1926;8093;11159
P43686	P43686	2	2	2	26S protease regulatory subunit 6B	PSMC4	sp|P43686|PRS6B_HUMAN 26S proteasome regulatory subunit 6B OS=Homo sapiens OX=9606 GN=PSMC4 PE=1 SV=2	1	2	2	2	10.3	10.3	10.3	47.366	418	418	0	3.6882	11582000	2				565	593;5574	True;True	609;5689	775;7509	790;7792	790;7792
P45880	P45880	3	3	3	Voltage-dependent anion-selective channel protein 2	VDAC2	sp|P45880|VDAC2_HUMAN Voltage-dependent anion-selective channel protein 2 OS=Homo sapiens OX=9606 GN=VDAC2 PE=1 SV=2	1	3	3	3	18.4	18.4	18.4	31.566	294	294	0	7.431	23736000	3				566	6781;7598;9203	True;True;True	6943;7800;9445	9236;10389;12525	9608;10830;13040	9608;10830;13040
P46013	P46013	6	6	6	Antigen KI-67	MKI67	sp|P46013|KI67_HUMAN Proliferation marker protein Ki-67 OS=Homo sapiens OX=9606 GN=MKI67 PE=1 SV=2	1	6	6	6	3.3	3.3	3.3	358.69	3256	3256	0	2.2236	33116000	6				567	1797;1798;1935;3208;6914;8295	True;True;True;True;True;True	1836;1837;1977;3280;7084;8523	2394;2395;2575;4313;9409;11362	2480;2481;2681;4487;9788;11847	2480;2481;2681;4487;9788;11847
P46063	P46063	9	9	9	ATP-dependent DNA helicase Q1	RECQL	sp|P46063|RECQ1_HUMAN ATP-dependent DNA helicase Q1 OS=Homo sapiens OX=9606 GN=RECQL PE=1 SV=3	1	9	9	9	20.6	20.6	20.6	73.457	649	649	0	35.283	116070000	9				568	102;537;2413;3925;5499;6320;6380;8078;8388	True;True;True;True;True;True;True;True;True	103;551;2469;4013;5613;6465;6525;8301;8618	130;698;3210;3211;5276;7410;8593;8679;11080;11489	133;713;3345;3346;5476;7692;8949;9036;11553;11977	133;713;3345;5476;7692;8949;9036;11553;11977
P46087	P46087	3	3	3	Probable 28S rRNA (cytosine(4447)-C(5))-methyltransferase	NOP2	sp|P46087|NOP2_HUMAN Probable 28S rRNA (cytosine(4447)-C(5))-methyltransferase OS=Homo sapiens OX=9606 GN=NOP2 PE=1 SV=2	1	3	3	3	4.6	4.6	4.6	89.301	812	812	0	9.8861	24403000	2				569	2536;3844;6093	True;True;True	2594;3932;6232	3376;5176;8235	3514;5372;8559	3514;5372;8559
P46379	P46379	13	13	13	Large proline-rich protein BAG6	BAG6	sp|P46379|BAG6_HUMAN Large proline-rich protein BAG6 OS=Homo sapiens OX=9606 GN=BAG6 PE=1 SV=2	1	13	13	13	25.9	25.9	25.9	119.41	1132	1132	0	45.789	380800000	18				570	549;572;990;1972;4804;5240;5535;6719;6860;7798;7808;8399;9268	True;True;True;True;True;True;True;True;True;True;True;True;True	563;587;1013;2015;4906;5352;5650;6880;7026;8007;8018;8629;9510	711;745;746;1324;2629;6469;7081;7457;7458;9164;9340;9341;10676;10691;10692;11511;11512;12645	726;760;761;1365;2735;6713;7353;7740;7741;9534;9716;9717;11132;11148;11149;12002;12003;13169	726;760;1365;2735;6713;7353;7741;9534;9717;11132;11149;12002;13169
P46776	P46776	3	3	3	60S ribosomal protein L27a	RPL27A	sp|P46776|RL27A_HUMAN 60S ribosomal protein L27a OS=Homo sapiens OX=9606 GN=RPL27A PE=1 SV=2	1	3	3	3	22.3	22.3	22.3	16.561	148	148	0	12.909	379190000	3				571	5493;6053;7587	True;True;True	5607;6190;7789	7404;8156;10371	7686;8472;10811	7686;8472;10811
P46777	P46777	11	11	11	60S ribosomal protein L5	RPL5	sp|P46777|RL5_HUMAN 60S ribosomal protein L5 OS=Homo sapiens OX=9606 GN=RPL5 PE=1 SV=3	1	11	11	11	42.8	42.8	42.8	34.362	297	297	0	34.616	923660000	15				572	1619;1620;2570;3240;4031;5439;6083;6084;6321;8278;9146	True;True;True;True;True;True;True;True;True;True;True	1657;1658;2630;3313;3314;4119;5553;6221;6222;6466;8505;9385	2167;2168;3421;3422;4360;4361;4362;4363;4364;5414;7332;8218;8219;8594;11337;11338;11339;12453	2246;2247;3559;3560;4536;4537;4538;4539;4540;5620;7608;8542;8543;8950;11821;11822;11823;12964	2246;2247;3560;4538;5620;7608;8542;8543;8950;11821;12964	128;129		200;208
P46778	P46778	4	4	4	60S ribosomal protein L21	RPL21	sp|P46778|RL21_HUMAN 60S ribosomal protein L21 OS=Homo sapiens OX=9606 GN=RPL21 PE=1 SV=2	1	4	4	4	27.5	27.5	27.5	18.565	160	160	0	32.263	921880000	5				573	1896;3226;7802;8874	True;True;True;True	1937;3298;8011;9109	2520;4339;10681;12099;12100	2617;4515;11138;12599;12600	2617;4515;11138;12599
P46779	P46779	4	4	4	60S ribosomal protein L28	RPL28	sp|P46779|RL28_HUMAN 60S ribosomal protein L28 OS=Homo sapiens OX=9606 GN=RPL28 PE=1 SV=3	1	4	4	4	24.8	24.8	24.8	15.747	137	137	0	6.4327	114380000	4				574	3116;6525;6753;9210	True;True;True;True	3187;6673;6915;9452	4186;8891;9203;12532	4356;9257;9574;13047	4356;9257;9574;13047
P46781	P46781	9	9	9	40S ribosomal protein S9	RPS9	sp|P46781|RS9_HUMAN 40S ribosomal protein S9 OS=Homo sapiens OX=9606 GN=RPS9 PE=1 SV=3	1	9	9	9	34	34	34	22.591	194	194	0	13.73	824640000	11				575	1821;4273;4519;4598;4790;5232;5651;6649;7238	True;True;True;True;True;True;True;True;True	1860;4365;4615;4697;4892;5344;5773;6802;7423	2421;2422;5743;5744;6082;6083;6202;6454;7071;7619;9060;9890	2508;2509;5952;5953;6307;6308;6435;6698;7343;7905;9427;10303	2508;5952;6307;6435;6698;7343;7905;9427;10303
P46782	P46782	11	11	11	40S ribosomal protein S5;40S ribosomal protein S5, N-terminally processed	RPS5	sp|P46782|RS5_HUMAN 40S ribosomal protein S5 OS=Homo sapiens OX=9606 GN=RPS5 PE=1 SV=4	1	11	11	11	46.6	46.6	46.6	22.876	204	204	0	51.708	2046800000	17				576	592;4066;5385;5744;6272;6273;6726;7561;7647;8566;8951	True;True;True;True;True;True;True;True;True;True;True	608;4154;5498;5874;6415;6416;6887;7762;7852;8800;9187	774;5454;7260;7747;8522;8523;8524;9172;9173;10334;10335;10475;10476;10477;11725;11726;12193;12194	789;5660;7536;8039;8876;8877;8878;9542;9543;10773;10774;10919;10920;10921;10922;12220;12221;12695;12696	789;5660;7536;8039;8876;8877;9542;10774;10919;12220;12695
P46783;Q9NQ39	P46783;Q9NQ39	7;4	7;4	7;4	40S ribosomal protein S10;Putative 40S ribosomal protein S10-like	RPS10;RPS10P5	sp|P46783|RS10_HUMAN 40S ribosomal protein S10 OS=Homo sapiens OX=9606 GN=RPS10 PE=1 SV=1;sp|Q9NQ39|RS10L_HUMAN Putative 40S ribosomal protein S10-like OS=Homo sapiens OX=9606 GN=RPS10P5 PE=5 SV=1	2	7	7	7	41.8	41.8	41.8	18.898	165	165;176	0	22.205	1808100000	10				577	149;1429;1916;3204;3427;4056;6123	True;True;True;True;True;True;True	153;1465;1958;3276;3507;4144;6262	199;200;1890;1891;1892;2553;4308;4309;4654;4655;5442;8272	202;203;1957;1958;1959;1960;2657;4482;4483;4836;4837;4838;5648;8597	202;1959;2657;4482;4837;5648;8597
P46940;Q86VI3;Q13576	P46940	70;3;2	70;3;2	70;3;2	Ras GTPase-activating-like protein IQGAP1	IQGAP1	sp|P46940|IQGA1_HUMAN Ras GTPase-activating-like protein IQGAP1 OS=Homo sapiens OX=9606 GN=IQGAP1 PE=1 SV=1	3	70	70	70	58.8	58.8	58.8	189.25	1657	1657;1631;1575	0	323.31	5210300000	96				578	417;590;719;1322;1550;1572;1583;1605;1738;1748;1950;2173;2202;2328;2345;2371;2400;2486;2757;3091;3360;3569;3570;3643;3694;3964;4124;4268;4363;4531;4547;4697;4708;4788;4827;5174;5599;5717;5764;6027;6115;6195;6423;6449;6450;6492;6498;6622;6628;6700;6736;6737;7000;7137;7159;7377;7407;7456;7559;7560;7731;7761;7990;8145;8162;8569;8573;8926;9060;9165	True;True;True;True;True;True;True;True;True;True;True;True;True;True;True;True;True;True;True;True;True;True;True;True;True;True;True;True;True;True;True;True;True;True;True;True;True;True;True;True;True;True;True;True;True;True;True;True;True;True;True;True;True;True;True;True;True;True;True;True;True;True;True;True;True;True;True;True;True;True	430;606;736;1354;1587;1610;1621;1643;1776;1786;1993;2223;2252;2381;2398;2426;2456;2544;2824;3162;3438;3649;3650;3723;3777;4052;4214;4360;4457;4628;4644;4798;4809;4890;4929;5284;5714;5715;5842;5897;6164;6254;6336;6568;6595;6596;6639;6645;6774;6780;6859;6898;6899;7175;7319;7342;7569;7599;7648;7760;7761;7937;7938;7969;8210;8370;8387;8803;8807;9162;9299;9404;9405	552;772;947;1752;1753;2049;2077;2123;2124;2151;2315;2327;2328;2329;2598;2599;2893;2926;3093;3116;3117;3153;3194;3195;3304;3305;3701;4158;4544;4545;4824;4825;4826;4913;4984;4985;5326;5327;5537;5538;5737;5887;5888;6105;6133;6346;6357;6452;6496;6976;7540;7541;7542;7705;7773;8123;8263;8264;8368;8740;8780;8781;8782;8783;8839;8840;8849;9021;9029;9030;9135;9184;9185;9558;9559;9765;9791;10074;10075;10108…	565;787;972;1812;1813;2123;2151;2201;2202;2230;2398;2410;2411;2412;2704;2705;3016;3049;3220;3243;3244;3245;3284;3327;3328;3441;3442;3855;4328;4723;4724;5009;5010;5011;5103;5175;5176;5530;5531;5744;5745;5946;6103;6104;6331;6363;6584;6596;6696;6742;7245;7823;7824;7825;7994;8066;8434;8588;8589;8699;9097;9142;9143;9144;9145;9202;9203;9212;9388;9396;9397;9505;9554;9555;9950;9951;10172;10199;10498;1049…	565;787;972;1812;2123;2151;2202;2230;2398;2411;2705;3016;3049;3220;3244;3284;3328;3442;3855;4328;4723;5009;5010;5103;5176;5530;5745;5946;6104;6331;6363;6584;6596;6696;6742;7245;7824;7994;8066;8434;8588;8699;9097;9142;9145;9202;9212;9388;9396;9505;9554;9555;9951;10172;10199;10498;10534;10601;10771;10772;11036;11075;11412;11639;11665;12224;12229;12666;12862;12985	130;131;132		866;1196;1240
P46977	P46977	4	3	3	Dolichyl-diphosphooligosaccharide--protein glycosyltransferase subunit STT3A	STT3A	sp|P46977|STT3A_HUMAN Dolichyl-diphosphooligosaccharide--protein glycosyltransferase subunit STT3A OS=Homo sapiens OX=9606 GN=STT3A PE=1 SV=2	1	4	3	3	6.2	5.4	5.4	80.529	705	705	0	5.9627	61427000	1				579	1880;2191;2341;2524	True;True;False;True	1921;2241;2394;2582	2501;2914;3112;3360	2597;3037;3239;3498	2597;3037;3239;3498
P47755	P47755	3	1	1	F-actin-capping protein subunit alpha-2	CAPZA2	sp|P47755|CAZA2_HUMAN F-actin-capping protein subunit alpha-2 OS=Homo sapiens OX=9606 GN=CAPZA2 PE=1 SV=3	1	3	1	1	14.7	5.2	5.2	32.949	286	286	0	2.9831	15321000	1				580	2464;3871;4976	True;False;False	2521;3959;5083	3275;5205;5206;5207;6739	3412;5401;5402;5403;7001	3412;5403;7001
P47756	P47756	5	5	5	F-actin-capping protein subunit beta	CAPZB	sp|P47756|CAPZB_HUMAN F-actin-capping protein subunit beta OS=Homo sapiens OX=9606 GN=CAPZB PE=1 SV=4	1	5	5	5	27.4	27.4	27.4	31.35	277	277	0	42.137	194940000	7				581	2586;4199;5970;6803;7334	True;True;True;True;True	2646;4290;6105;6969;7525	3441;3442;5639;5640;8045;9272;10021	3579;3580;5846;5847;8351;9644;10444	3579;5846;8351;9644;10444
P47897	P47897	4	4	4	Glutamine--tRNA ligase	QARS	sp|P47897|SYQ_HUMAN Glutamine--tRNA ligase OS=Homo sapiens OX=9606 GN=QARS PE=1 SV=1	1	4	4	4	7.4	7.4	7.4	87.798	775	775	0	8.6701	28779000	4				582	1516;3615;3756;4643	True;True;True;True	1553;3695;3841;4743	2005;4881;5062;6259	2078;5069;5255;6493	2078;5069;5255;6493
P47914	P47914	2	2	2	60S ribosomal protein L29	RPL29	sp|P47914|RL29_HUMAN 60S ribosomal protein L29 OS=Homo sapiens OX=9606 GN=RPL29 PE=1 SV=2	1	2	2	2	14.5	14.5	14.5	17.752	159	159	0	2.394	31903000	2				583	585;4463	True;True	601;4559	765;6016	780;6238	780;6238
P48047	P48047	2	2	2	ATP synthase subunit O, mitochondrial	ATP5O	sp|P48047|ATPO_HUMAN ATP synthase subunit O, mitochondrial OS=Homo sapiens OX=9606 GN=ATP5PO PE=1 SV=1	1	2	2	2	14.6	14.6	14.6	23.277	213	213	0	2.7298	27642000	2				584	2436;5471	True;True	2493;5585	3241;3242;7374	3377;3378;7651	3378;7651
P48059	P48059	1	1	1	LIM and senescent cell antigen-like-containing domain protein 1	LIMS1	sp|P48059|LIMS1_HUMAN LIM and senescent cell antigen-like-containing domain protein 1 OS=Homo sapiens OX=9606 GN=LIMS1 PE=1 SV=4	1	1	1	1	3.7	3.7	3.7	37.251	325	325	0.0022075	0.86443	0	1				585	8339	TRUE	8568	11424	11910	11910
P48444	P48444	3	3	3	Coatomer subunit delta	ARCN1	sp|P48444|COPD_HUMAN Coatomer subunit delta OS=Homo sapiens OX=9606 GN=ARCN1 PE=1 SV=1	1	3	3	3	4.9	4.9	4.9	57.21	511	511	0	4.4533	19233000	3				586	3516;6098;7877	True;True;True	3596;6237;8091	4756;8242;10784	4941;8567;11242	4941;8567;11242
P48509	P48509	1	1	1	CD151 antigen	CD151	sp|P48509|CD151_HUMAN CD151 antigen OS=Homo sapiens OX=9606 GN=CD151 PE=1 SV=3	1	1	1	1	4	4	4	28.295	253	253	0.0082079	0.54753	0	1				587	4576	TRUE	4675	6176	6408	6408
P48634	P48634	3	3	3	Protein PRRC2A	PRRC2A	sp|P48634|PRC2A_HUMAN Protein PRRC2A OS=Homo sapiens OX=9606 GN=PRRC2A PE=1 SV=3	1	3	3	3	3.2	3.2	3.2	228.86	2157	2157	0	1.585	36098000	4				588	4513;4831;5007	True;True;True	4609;4933;5116	6076;6500;6775;6776	6301;6746;7037;7038	6301;6746;7037
P48643	P48643	11	11	11	T-complex protein 1 subunit epsilon	CCT5	sp|P48643|TCPE_HUMAN T-complex protein 1 subunit epsilon OS=Homo sapiens OX=9606 GN=CCT5 PE=1 SV=1	1	11	11	11	30.3	30.3	30.3	59.67	541	541	0	42.085	77611000	11				589	207;686;815;1872;3249;3424;3893;4675;5080;7052;8961	True;True;True;True;True;True;True;True;True;True;True	214;703;835;1913;3323;3504;3981;4776;5189;7228;9197	273;907;1091;2493;4373;4650;5237;6320;6860;9644;12205	277;932;1120;2589;4549;4832;5435;6557;7123;10045;12708	277;932;1120;2589;4549;4832;5435;6557;7123;10045;12708
P48651	P48651	3	3	3	Phosphatidylserine synthase 1	PTDSS1	sp|P48651|PTSS1_HUMAN Phosphatidylserine synthase 1 OS=Homo sapiens OX=9606 GN=PTDSS1 PE=1 SV=1	1	3	3	3	9.7	9.7	9.7	55.527	473	473	0	8.4193	24306000	2				590	787;3721;8048	True;True;True	805;3805;8271	1047;5019;11041	1075;5211;11512	1075;5211;11512
P48729;Q8N752	P48729;Q8N752	12;6	12;6	12;6	Casein kinase I isoform alpha;Casein kinase I isoform alpha-like	CSNK1A1;CSNK1A1L	sp|P48729|KC1A_HUMAN Casein kinase I isoform alpha OS=Homo sapiens OX=9606 GN=CSNK1A1 PE=1 SV=2;sp|Q8N752|KC1AL_HUMAN Casein kinase I isoform alpha-like OS=Homo sapiens OX=9606 GN=CSNK1A1L PE=2 SV=2	2	12	12	12	46.9	46.9	46.9	38.914	337	337;337	0	65.118	776670000	16				591	69;1095;2175;2685;3754;4616;5737;6566;7752;7905;7997;8990	True;True;True;True;True;True;True;True;True;True;True;True	70;1118;2225;2746;3839;4715;5864;6716;7960;8120;8217;9227	93;94;1448;2895;3570;5059;5060;6221;6222;7732;8943;10613;10821;10960;12256;12257	94;95;1493;3018;3713;5252;5253;6455;6456;8024;9309;11063;11279;11426;12760;12761	94;1493;3018;3713;5253;6456;8024;9309;11063;11279;11426;12761
P48730;P49674	P48730;P49674	6;4	6;4	6;4	Casein kinase I isoform delta;Casein kinase I isoform epsilon	CSNK1D;CSNK1E	sp|P48730|KC1D_HUMAN Casein kinase I isoform delta OS=Homo sapiens OX=9606 GN=CSNK1D PE=1 SV=2;sp|P49674|KC1E_HUMAN Casein kinase I isoform epsilon OS=Homo sapiens OX=9606 GN=CSNK1E PE=1 SV=1	2	6	6	6	20.7	20.7	20.7	47.33	415	415;416	0	8.0056	50398000	7				592	1380;2152;2564;3069;4145;7692	True;True;True;True;True;True	1415;2202;2624;3140;4235;7897	1831;2864;2865;3415;4134;5570;10533	1896;2983;2984;3553;4303;5777;10982	1896;2983;3553;4303;5777;10982
P49321	P49321	13	13	13	Nuclear autoantigenic sperm protein	NASP	sp|P49321|NASP_HUMAN Nuclear autoantigenic sperm protein OS=Homo sapiens OX=9606 GN=NASP PE=1 SV=2	1	13	13	13	26.8	26.8	26.8	85.237	788	788	0	48.222	370910000	17				593	727;1697;2079;2705;3286;4257;5332;6329;6946;8159;8641;8642;9052	True;True;True;True;True;True;True;True;True;True;True;True;True	745;1735;2126;2766;3361;4349;5445;6474;7119;8384;8875;8876;9291	965;2263;2264;2767;3595;4431;5721;5722;7197;8604;8605;9474;11183;11816;11817;12344	991;2345;2346;2876;3739;4610;5929;5930;5931;7473;8961;8962;9864;11660;11661;12313;12314;12853	991;2345;2876;3739;4610;5930;7473;8962;9864;11661;12313;12314;12853
P49327	P49327	30	30	30	Fatty acid synthase;[Acyl-carrier-protein] S-acetyltransferase;[Acyl-carrier-protein] S-malonyltransferase;3-oxoacyl-[acyl-carrier-protein] synthase;3-oxoacyl-[acyl-carrier-protein] reductase;3-hydroxyacyl-[acyl-carrier-protein] dehydratase;Enoyl-[acyl-carrier-protein] reductase;Oleoyl-[acyl-carrier-protein] hydrolase	FASN	sp|P49327|FAS_HUMAN Fatty acid synthase OS=Homo sapiens OX=9606 GN=FASN PE=1 SV=3	1	30	30	30	19.8	19.8	19.8	273.42	2511	2511	0	121.02	403880000	30				594	55;95;357;635;1219;1245;1531;1644;1921;2143;2149;2164;2735;3062;3135;3346;3824;4593;5128;5239;5578;6344;6825;7625;8433;8476;8776;8799;8851;8923	True;True;True;True;True;True;True;True;True;True;True;True;True;True;True;True;True;True;True;True;True;True;True;True;True;True;True;True;True;True	56;96;369;652;1246;1275;1568;1682;1963;2193;2199;2214;2801;3133;3206;3423;3912;4692;5238;5351;5693;6489;6991;7830;8664;8707;9010;9033;9086;9159	77;122;472;830;1613;1650;2023;2194;2559;2855;2861;2881;3666;4125;4210;4522;5152;6196;6917;7080;7515;8624;9298;10434;11562;11620;11977;12005;12006;12007;12070;12162	78;125;483;846;1664;1706;2097;2274;2665;2974;2980;3003;3818;4293;4382;4701;5347;6429;7182;7352;7798;8981;9671;10875;12056;12114;12475;12503;12504;12505;12570;12662	78;125;483;846;1664;1706;2097;2274;2665;2974;2980;3003;3818;4293;4382;4701;5347;6429;7182;7352;7798;8981;9671;10875;12056;12114;12475;12503;12570;12662
P49368	P49368	7	7	7	T-complex protein 1 subunit gamma	CCT3	sp|P49368|TCPG_HUMAN T-complex protein 1 subunit gamma OS=Homo sapiens OX=9606 GN=CCT3 PE=1 SV=4	1	7	7	7	24.8	24.8	24.8	60.533	545	545	0	15.125	120020000	7				595	3822;3908;4000;4015;4134;5671;6118	True;True;True;True;True;True;True	3910;3996;4088;4103;4224;5794;6257	5150;5256;5375;5391;5554;7645;8267	5345;5454;5579;5596;5761;7933;8592	5345;5454;5579;5596;5761;7933;8592
P49411	P49411	15	15	15	Elongation factor Tu, mitochondrial	TUFM	sp|P49411|EFTU_HUMAN Elongation factor Tu, mitochondrial OS=Homo sapiens OX=9606 GN=TUFM PE=1 SV=2	1	15	15	15	35.8	35.8	35.8	49.541	452	452	0	72.272	627970000	19				596	1142;1165;1680;1766;1819;1820;2364;2622;2623;4131;4887;6357;7940;8028;8179	True;True;True;True;True;True;True;True;True;True;True;True;True;True;True	1166;1190;1718;1805;1858;1859;2419;2682;2683;4221;4990;6502;8159;8251;8404	1512;1542;1543;2242;2359;2419;2420;3145;3489;3490;5550;6598;6599;8645;8646;10873;11017;11018;11208	1558;1589;1590;2323;2443;2506;2507;3276;3629;3630;5757;6855;6856;9002;9003;11331;11487;11488;11686	1558;1589;2323;2443;2506;2507;3276;3629;3630;5757;6855;9002;11331;11487;11686
P49642	P49642	1	1	1	DNA primase small subunit	PRIM1	sp|P49642|PRI1_HUMAN DNA primase small subunit OS=Homo sapiens OX=9606 GN=PRIM1 PE=1 SV=1	1	1	1	1	5.2	5.2	5.2	49.901	420	420	0.0015232	1.0681	8463300	1				597	1774	TRUE	1813	2368	2452	2452
P49643	P49643	2	2	2	DNA primase large subunit	PRIM2	sp|P49643|PRI2_HUMAN DNA primase large subunit OS=Homo sapiens OX=9606 GN=PRIM2 PE=1 SV=2	1	2	2	2	4.9	4.9	4.9	58.805	509	509	0	2.3012	7047200	2				598	3821;3922	True;True	3909;4010	5149;5272	5344;5471	5344;5471
P49721	P49721	1	1	1	Proteasome subunit beta type-2	PSMB2	sp|P49721|PSB2_HUMAN Proteasome subunit beta type-2 OS=Homo sapiens OX=9606 GN=PSMB2 PE=1 SV=1	1	1	1	1	5.5	5.5	5.5	22.836	201	201	0	2.1749	4468400	1				599	2265	TRUE	2317	3017	3143	3143
P49750	P49750	2	2	2	YLP motif-containing protein 1	YLPM1	sp|P49750|YLPM1_HUMAN YLP motif-containing protein 1 OS=Homo sapiens OX=9606 GN=YLPM1 PE=1 SV=4	1	2	2	2	1.5	1.5	1.5	241.64	2146	2146	0	2.3609	17490000	2				600	343;1108	True;True	354;1131	452;1461	463;1506	463;1506
P49756	P49756	1	1	1	RNA-binding protein 25	RBM25	sp|P49756|RBM25_HUMAN RNA-binding protein 25 OS=Homo sapiens OX=9606 GN=RBM25 PE=1 SV=3	1	1	1	1	0.9	0.9	0.9	100.18	843	843	0.0022305	0.9193	4478100	1				601	2552	TRUE	2610	3396	3534	3534
P49761	P49761	2	2	2	Dual specificity protein kinase CLK3	CLK3	sp|P49761|CLK3_HUMAN Dual specificity protein kinase CLK3 OS=Homo sapiens OX=9606 GN=CLK3 PE=1 SV=3	1	2	2	2	6.4	6.4	6.4	73.514	638	638	0	7.9594	18546000	2				602	3958;8059	True;True	4046;8282	5319;11054	5523;11526	5523;11526
P49790	P49790	8	8	8	Nuclear pore complex protein Nup153	NUP153	sp|P49790|NU153_HUMAN Nuclear pore complex protein Nup153 OS=Homo sapiens OX=9606 GN=NUP153 PE=1 SV=2	1	8	8	8	11.6	11.6	11.6	153.94	1475	1475	0	23.095	105650000	8				603	2244;2283;2478;2717;3605;4241;6167;7438	True;True;True;True;True;True;True;True	2296;2335;2535;2779;3685;4332;6308;7630	2993;3038;3291;3611;3612;4866;5696;8334;10149	3119;3164;3428;3755;3756;5052;5904;8665;10577	3119;3164;3428;3755;5052;5904;8665;10577
P49792;P0DJD0;P0DJD1;Q7Z3J3;A6NKT7	P49792;P0DJD0;P0DJD1;Q7Z3J3;A6NKT7	2;1;1;1;1	2;1;1;1;1	2;1;1;1;1	E3 SUMO-protein ligase RanBP2;RANBP2-like and GRIP domain-containing protein 1;RANBP2-like and GRIP domain-containing protein 2;RanBP2-like and GRIP domain-containing protein 4;RanBP2-like and GRIP domain-containing protein 3	RANBP2;RGPD1;RGPD2;RGPD4;RGPD3	sp|P49792|RBP2_HUMAN E3 SUMO-protein ligase RanBP2 OS=Homo sapiens OX=9606 GN=RANBP2 PE=1 SV=2;sp|P0DJD0|RGPD1_HUMAN RANBP2-like and GRIP domain-containing protein 1 OS=Homo sapiens OX=9606 GN=RGPD1 PE=2 SV=1;sp|P0DJD1|RGPD2_HUMAN RANBP2-like and GRIP doma	5	2	2	2	0.8	0.8	0.8	358.2	3224	3224;1748;1756;1758;1758	0	4.3011	13484000	2				604	2313;3450	True;True	2366;3530	3076;4681	3203;4866	3203;4866
P49841	P49841	2	2	2	Glycogen synthase kinase-3 beta	GSK3B	sp|P49841|GSK3B_HUMAN Glycogen synthase kinase-3 beta OS=Homo sapiens OX=9606 GN=GSK3B PE=1 SV=2	1	2	2	2	12.6	12.6	12.6	46.744	420	420	0	3.5701	21127000	2				605	1355;8775	True;True	1388;9009	1795;11976	1855;12474	1855;12474
P49916	P49916	10	10	10	DNA ligase 3	LIG3	sp|P49916|DNLI3_HUMAN DNA ligase 3 OS=Homo sapiens OX=9606 GN=LIG3 PE=1 SV=2	1	10	10	10	12.9	12.9	12.9	112.91	1009	1009	0	20.428	89006000	10				606	107;396;1168;1736;1923;4147;4978;7074;8366;8471	True;True;True;True;True;True;True;True;True;True	108;409;1193;1774;1965;4237;5085;7250;8595;8702	135;525;1546;2313;2561;5572;6741;9673;11461;11614	138;538;1593;2396;2667;5779;7003;10074;11949;12108	138;538;1593;2396;2667;5779;7003;10074;11949;12108
P49959	P49959	3	3	3	Double-strand break repair protein MRE11A	MRE11A	sp|P49959|MRE11_HUMAN Double-strand break repair protein MRE11 OS=Homo sapiens OX=9606 GN=MRE11 PE=1 SV=3	1	3	3	3	4.8	4.8	4.8	80.592	708	708	0	1.8704	17730000	2				607	3481;7729;8173	True;True;True	3561;7935;8398	4718;10583;11200	4903;11032;11678	4903;11032;11678
P50213	P50213	1	1	1	Isocitrate dehydrogenase [NAD] subunit alpha, mitochondrial	IDH3A	sp|P50213|IDH3A_HUMAN Isocitrate dehydrogenase [NAD] subunit alpha, mitochondrial OS=Homo sapiens OX=9606 GN=IDH3A PE=1 SV=1	1	1	1	1	4.6	4.6	4.6	39.591	366	366	0.0082531	0.56668	3008800	1				608	1225	TRUE	1253	1623	1675	1675
P50395	P50395	2	2	2	Rab GDP dissociation inhibitor beta	GDI2	sp|P50395|GDIB_HUMAN Rab GDP dissociation inhibitor beta OS=Homo sapiens OX=9606 GN=GDI2 PE=1 SV=2	1	2	2	2	7.9	7.9	7.9	50.663	445	445	0	2.364	5848400	2				609	8037;8613	True;True	8260;8847	11029;11782	11500;12279	11500;12279
P50402	P50402	8	8	8	Emerin	EMD	sp|P50402|EMD_HUMAN Emerin OS=Homo sapiens OX=9606 GN=EMD PE=1 SV=1	1	8	8	8	41.7	41.7	41.7	28.994	254	254	0	35.595	212860000	8				610	1303;3150;4093;5312;5553;6651;8040;9176	True;True;True;True;True;True;True;True	1334;3221;4183;5425;5668;6804;8263;9416	1725;1726;4229;5497;7174;7484;9062;11032;12488	1784;1785;4401;5703;7450;7767;9429;11503;13000	1785;4401;5703;7450;7767;9429;11503;13000
P50416	P50416	2	2	2	Carnitine O-palmitoyltransferase 1, liver isoform	CPT1A	sp|P50416|CPT1A_HUMAN Carnitine O-palmitoyltransferase 1, liver isoform OS=Homo sapiens OX=9606 GN=CPT1A PE=1 SV=2	1	2	2	2	2.8	2.8	2.8	88.367	773	773	0	1.9841	19702000	2				611	279;9125	True;True	289;9364	369;12431	379;12942	379;12942
P50454	P50454	3	3	3	Serpin H1	SERPINH1	sp|P50454|SERPH_HUMAN Serpin H1 OS=Homo sapiens OX=9606 GN=SERPINH1 PE=1 SV=2	1	3	3	3	14.1	14.1	14.1	46.44	418	418	0	5.4984	33031000	3				612	788;1272;5197	True;True;True	806;1303;5308	1048;1687;7009	1076;1744;7279	1076;1744;7279
P50579	P50579	2	2	2	Methionine aminopeptidase 2	METAP2	sp|P50579|MAP2_HUMAN Methionine aminopeptidase 2 OS=Homo sapiens OX=9606 GN=METAP2 PE=1 SV=1	1	2	2	2	11.1	11.1	11.1	52.891	478	478	0	10.93	18211000	1				613	300;5924	True;True	310;6058	392;7984	402;8284	402;8284
P50914	P50914	4	4	4	60S ribosomal protein L14	RPL14	sp|P50914|RL14_HUMAN 60S ribosomal protein L14 OS=Homo sapiens OX=9606 GN=RPL14 PE=1 SV=4	1	4	4	4	18.6	18.6	18.6	23.432	215	215	0	9.1673	261330000	7				614	888;2482;5420;8123	True;True;True;True	909;2540;5534;8346	1179;1180;3299;7307;7308;11134;11135	1212;1213;3436;7583;7584;11608;11609	1212;3436;7583;11609
P50990	P50990	6	6	6	T-complex protein 1 subunit theta	CCT8	sp|P50990|TCPQ_HUMAN T-complex protein 1 subunit theta OS=Homo sapiens OX=9606 GN=CCT8 PE=1 SV=4	1	6	6	6	15.3	15.3	15.3	59.62	548	548	0	23.609	106840000	5				615	329;1080;3453;3731;4450;6111	True;True;True;True;True;True	340;1103;3533;3815;4546;6250	431;1429;4684;5030;6003;8258	441;1474;4869;5222;6225;8583	441;1474;4869;5222;6225;8583
P50991	P50991	12	12	12	T-complex protein 1 subunit delta	CCT4	sp|P50991|TCPD_HUMAN T-complex protein 1 subunit delta OS=Homo sapiens OX=9606 GN=CCT4 PE=1 SV=4	1	12	12	12	32.1	32.1	32.1	57.924	539	539	0	40.982	260800000	10				616	208;432;840;941;2781;2787;3591;5432;5643;7507;8019;8331	True;True;True;True;True;True;True;True;True;True;True;True	215;445;861;964;2848;2854;3671;5546;5765;7704;8242;8560	274;571;1121;1261;3733;3741;4850;7324;7609;10257;11003;11414	278;584;1151;1299;3888;3896;5035;7600;7895;10691;11473;11900	278;584;1151;1299;3888;3896;5035;7600;7895;10691;11473;11900
P51114	P51114	22	22	21	Fragile X mental retardation syndrome-related protein 1	FXR1	sp|P51114|FXR1_HUMAN Fragile X mental retardation syndrome-related protein 1 OS=Homo sapiens OX=9606 GN=FXR1 PE=1 SV=3	1	22	22	21	48.1	48.1	46.9	69.72	621	621	0	160.37	1427600000	32				617	183;528;1256;1375;1378;1532;1539;1977;3514;3568;4033;4082;4104;4324;5071;6383;6611;6725;7267;8367;8559;8662	True;True;True;True;True;True;True;True;True;True;True;True;True;True;True;True;True;True;True;True;True;True	189;542;1287;1410;1413;1569;1576;2020;3594;3648;4121;4171;4194;4418;5180;6528;6762;6886;7454;8596;8793;8897	242;688;1667;1668;1826;1829;2024;2034;2035;2635;2636;4754;4823;5416;5476;5477;5478;5509;5510;5819;5820;6851;8683;8684;9002;9171;9932;9933;11462;11716;11717;11840	245;703;1724;1725;1891;1894;2098;2108;2109;2741;2742;4939;5008;5622;5682;5683;5684;5716;5717;6032;6033;7113;9040;9041;9369;9541;10349;10350;11950;12211;12212;12337	245;703;1725;1891;1894;2098;2109;2742;4939;5008;5622;5682;5717;6032;7113;9041;9369;9541;10349;11950;12212;12337
P51116	P51116	6	4	4	Fragile X mental retardation syndrome-related protein 2	FXR2	sp|P51116|FXR2_HUMAN Fragile X mental retardation syndrome-related protein 2 OS=Homo sapiens OX=9606 GN=FXR2 PE=1 SV=2	1	6	4	4	12	8	8	74.222	673	673	0	16.241	105990000	6				618	682;1538;1726;4325;6384;8367	True;False;True;True;True;False	699;1575;1764;4419;6529;8596	902;903;2032;2033;2298;5821;5822;8685;11462	927;928;2106;2107;2381;6034;6035;9042;11950	927;2107;2381;6034;9042;11950
P51532	P51532	2	2	2	Transcription activator BRG1	SMARCA4	sp|P51532|SMCA4_HUMAN Transcription activator BRG1 OS=Homo sapiens OX=9606 GN=SMARCA4 PE=1 SV=2	1	2	2	2	1.8	1.8	1.8	184.64	1647	1647	0	4.4558	14014000	2				619	2049;2878	True;True	2096;2946	2730;3880	2839;4041	2839;4041
P51571	P51571	2	2	2	Translocon-associated protein subunit delta	SSR4	sp|P51571|SSRD_HUMAN Translocon-associated protein subunit delta OS=Homo sapiens OX=9606 GN=SSR4 PE=1 SV=1	1	2	2	2	16.8	16.8	16.8	18.998	173	173	0.00078493	1.3403	11669000	2				620	6006;9208	True;True	6143;9450	8099;12530	8409;13045	8409;13045
P51610	P51610	6	6	6	Host cell factor 1;HCF N-terminal chain 1;HCF N-terminal chain 2;HCF N-terminal chain 3;HCF N-terminal chain 4;HCF N-terminal chain 5;HCF N-terminal chain 6;HCF C-terminal chain 1;HCF C-terminal chain 2;HCF C-terminal chain 3;HCF C-terminal chain 4;HCF C-terminal chain 5;HCF C-terminal chain 6	HCFC1	sp|P51610|HCFC1_HUMAN Host cell factor 1 OS=Homo sapiens OX=9606 GN=HCFC1 PE=1 SV=2	1	6	6	6	5.3	5.3	5.3	208.73	2035	2035	0	11.424	39460000	6				621	653;3449;3930;5175;7149;7167	True;True;True;True;True;True	670;3529;4018;5285;7331;7350	854;4680;5282;6977;9778;9799	875;4865;5486;7246;10185;10208	875;4865;5486;7246;10185;10208
P51648	P51648	1	1	1	Fatty aldehyde dehydrogenase	ALDH3A2	sp|P51648|AL3A2_HUMAN Aldehyde dehydrogenase family 3 member A2 OS=Homo sapiens OX=9606 GN=ALDH3A2 PE=1 SV=1	1	1	1	1	3.5	3.5	3.5	54.847	485	485	0	2.2248	3855900	1				622	8545	TRUE	8779	11700	12195	12195
P51659	P51659	9	9	9	Peroxisomal multifunctional enzyme type 2;(3R)-hydroxyacyl-CoA dehydrogenase;Enoyl-CoA hydratase 2	HSD17B4	sp|P51659|DHB4_HUMAN Peroxisomal multifunctional enzyme type 2 OS=Homo sapiens OX=9606 GN=HSD17B4 PE=1 SV=3	1	9	9	9	20.7	20.7	20.7	79.685	736	736	0	38.012	97326000	7				623	739;833;3457;3495;4702;7121;8110;8459;8496	True;True;True;True;True;True;True;True;True	757;853;3537;3575;4803;7300;8333;8690;8727	980;1110;4688;4732;6351;9733;11119;11594;11643	1006;1140;4873;4917;6589;10136;11593;12088;12137	1006;1140;4873;4917;6589;10136;11593;12088;12137
P51808	P51808	1	1	1	Dynein light chain Tctex-type 3	DYNLT3	sp|P51808|DYLT3_HUMAN Dynein light chain Tctex-type 3 OS=Homo sapiens OX=9606 GN=DYNLT3 PE=1 SV=1	1	1	1	1	14.7	14.7	14.7	13.062	116	116	0	3.8846	8176500	1				624	3171	TRUE	3242	4258	4432	4432
P51812	P51812	1	1	1	Ribosomal protein S6 kinase alpha-3	RPS6KA3	sp|P51812|KS6A3_HUMAN Ribosomal protein S6 kinase alpha-3 OS=Homo sapiens OX=9606 GN=RPS6KA3 PE=1 SV=1	1	1	1	1	1.1	1.1	1.1	83.735	740	740	0.0015314	1.1167	5266200	1				625	5341	TRUE	5454	7209	7485	7485
P51991	P51991	11	11	11	Heterogeneous nuclear ribonucleoprotein A3	HNRNPA3	sp|P51991|ROA3_HUMAN Heterogeneous nuclear ribonucleoprotein A3 OS=Homo sapiens OX=9606 GN=HNRNPA3 PE=1 SV=2	1	11	11	11	34.7	34.7	34.7	39.594	378	378	0	52.637	623340000	11				626	1552;2619;2647;4162;4200;4609;4610;5589;6603;7261;8903	True;True;True;True;True;True;True;True;True;True;True	1589;2679;2707;4252;4291;4708;4709;5704;6754;7447;7448;9139	2053;3485;3486;3519;3520;5590;5641;6213;6214;7526;8990;9925;9926;12137	2127;3625;3626;3659;3660;5797;5848;6446;6447;7809;9357;10342;10343;12637	2127;3626;3660;5797;5848;6446;6447;7809;9357;10342;12637		19		358
P52272	P52272	27	27	27	Heterogeneous nuclear ribonucleoprotein M	HNRNPM	sp|P52272|HNRPM_HUMAN Heterogeneous nuclear ribonucleoprotein M OS=Homo sapiens OX=9606 GN=HNRNPM PE=1 SV=3	1	27	27	27	52.9	52.9	52.9	77.515	730	730	0	165.6	3066000000	38				627	33;34;120;230;1130;2240;2356;2580;2590;2786;2914;3797;4677;4725;4849;5606;5607;5615;5617;5619;5620;5621;5622;5955;6333;8268;8531	True;True;True;True;True;True;True;True;True;True;True;True;True;True;True;True;True;True;True;True;True;True;True;True;True;True;True	34;35;121;238;1153;2292;2411;2640;2650;2853;2984;3885;4778;4826;4951;5722;5723;5733;5734;5736;5738;5739;5740;5741;5742;6090;6478;8495;8763	39;40;150;151;301;1487;1488;2988;3135;3136;3434;3446;3447;3448;3739;3740;3933;3934;5120;6323;6375;6529;6530;7549;7550;7568;7569;7571;7573;7574;7575;7576;7577;7578;8020;8611;11324;11683	39;40;153;154;306;307;1532;1533;3114;3263;3264;3572;3584;3585;3586;3894;3895;4094;4095;5313;6560;6616;6776;6777;7833;7834;7854;7855;7857;7859;7860;7861;7862;7863;7864;8320;8968;11807;12178	39;40;153;306;1533;3114;3264;3572;3586;3894;4095;5313;6560;6616;6776;7833;7834;7855;7857;7859;7860;7861;7864;8320;8968;11807;12178	133;134		457;607
P52292	P52292	12	12	12	Importin subunit alpha-1	KPNA2	sp|P52292|IMA1_HUMAN Importin subunit alpha-1 OS=Homo sapiens OX=9606 GN=KPNA2 PE=1 SV=1	1	12	12	12	40.5	40.5	40.5	57.861	529	529	0	78.768	210770000	14				628	344;2499;2795;3538;4948;4959;5288;5915;6013;6018;6131;7491	True;True;True;True;True;True;True;True;True;True;True;True	355;2557;2862;3618;5055;5066;5401;6049;6150;6155;6270;7684	453;3323;3753;3754;4781;6702;6717;7144;7964;7965;8107;8112;8113;8285;10223	464;3460;3908;3909;4966;6963;6979;7420;8264;8265;8418;8423;8424;8612;10655	464;3460;3908;4966;6963;6979;7420;8265;8418;8423;8612;10655
P52294	P52294	3	2	2	Importin subunit alpha-5;Importin subunit alpha-5, N-terminally processed	KPNA1	sp|P52294|IMA5_HUMAN Importin subunit alpha-5 OS=Homo sapiens OX=9606 GN=KPNA1 PE=1 SV=3	1	3	2	2	9.3	6.7	6.7	60.221	538	538	0	4.1621	34177000	3				629	1442;1904;4011	True;True;False	1479;1946;4099	1912;1913;2534;5386	1983;1984;2632;5591	1983;2632;5591
P52597	P52597	15	13	13	Heterogeneous nuclear ribonucleoprotein F;Heterogeneous nuclear ribonucleoprotein F, N-terminally processed	HNRNPF	sp|P52597|HNRPF_HUMAN Heterogeneous nuclear ribonucleoprotein F OS=Homo sapiens OX=9606 GN=HNRNPF PE=1 SV=3	1	15	13	13	57.6	51.1	51.1	45.671	415	415	0	86.534	660020000	17				630	716;1210;2350;2875;3339;3950;5721;6192;6491;7420;7543;8312;8743;9049;9099	False;True;True;True;True;True;True;True;True;True;True;False;True;True;True	733;1236;2404;2943;3416;4038;5846;6333;6638;7612;7741;8541;8977;9288;9338	942;943;944;1600;1601;3127;3861;3862;4512;5308;5309;7710;8365;8838;10125;10303;11384;11385;11386;11938;12340;12341;12399	967;968;969;1650;1651;3255;4016;4017;4691;5512;5513;7999;8696;9201;10552;10740;11869;11870;11871;11872;12436;12849;12850;12910	969;1650;3255;4016;4691;5512;7999;8696;9201;10552;10740;11871;12436;12850;12910
P52701	P52701	21	21	21	DNA mismatch repair protein Msh6	MSH6	sp|P52701|MSH6_HUMAN DNA mismatch repair protein Msh6 OS=Homo sapiens OX=9606 GN=MSH6 PE=1 SV=2	1	21	21	21	22.6	22.6	22.6	152.78	1360	1360	0	56.861	276510000	18				631	264;834;2199;2727;2930;3051;3072;3628;4406;5263;6239;6258;6831;7217;7272;7356;7683;7722;7737;8324;9204	True;True;True;True;True;True;True;True;True;True;True;True;True;True;True;True;True;True;True;True;True	273;854;2249;2789;3000;3122;3143;3708;4501;5376;6381;6401;6997;7401;7459;7547;7888;7928;7944;8553;9446	349;1111;2922;3625;3954;4112;4137;4896;5940;7110;8429;8499;8500;9304;9861;9938;10048;10522;10576;10594;11401;12526	359;1141;3045;3771;4116;4280;4306;5085;6159;7382;8762;8851;8852;9677;10273;10355;10471;10969;11025;11043;11887;13041	359;1141;3045;3771;4116;4280;4306;5085;6159;7382;8762;8851;9677;10273;10355;10471;10969;11025;11043;11887;13041
P52907	P52907	9	9	7	F-actin-capping protein subunit alpha-1	CAPZA1	sp|P52907|CAZA1_HUMAN F-actin-capping protein subunit alpha-1 OS=Homo sapiens OX=9606 GN=CAPZA1 PE=1 SV=3	1	9	9	7	53.8	53.8	44.4	32.922	286	286	0	104.62	499940000	13				632	106;1394;2274;2463;3518;3634;3871;4976;7656	True;True;True;True;True;True;True;True;True	107;1429;2326;2520;3598;3714;3959;5083;7861	134;1846;3026;3027;3274;4758;4904;5205;5206;5207;6739;10488;10489	137;1912;3152;3153;3411;4943;5093;5401;5402;5403;7001;10933;10934	137;1912;3152;3411;4943;5093;5403;7001;10934
P53007	P53007	4	4	4	Tricarboxylate transport protein, mitochondrial	SLC25A1	sp|P53007|TXTP_HUMAN Tricarboxylate transport protein, mitochondrial OS=Homo sapiens OX=9606 GN=SLC25A1 PE=1 SV=2	1	4	4	4	22.5	22.5	22.5	34.012	311	311	0	11.97	97600000	5				633	2230;2262;2600;2889	True;True;True;True	2280;2314;2660;2957	2973;2974;3014;3459;3892	3097;3098;3140;3598;4053	3097;3140;3598;4053
P53350	P53350	2	2	2	Serine/threonine-protein kinase PLK1	PLK1	sp|P53350|PLK1_HUMAN Serine/threonine-protein kinase PLK1 OS=Homo sapiens OX=9606 GN=PLK1 PE=1 SV=1	1	2	2	2	6	6	6	68.254	603	603	0	2.6365	2410100	2				634	305;6292	True;True	316;6436	401;8554	411;8910	411;8910
P53396	P53396	1	1	1	ATP-citrate synthase	ACLY	sp|P53396|ACLY_HUMAN ATP-citrate synthase OS=Homo sapiens OX=9606 GN=ACLY PE=1 SV=3	1	1	1	1	1.5	1.5	1.5	120.84	1101	1101	0	3.2964	4810300	1				635	1220	TRUE	1247	1614	1665	1665
P53618	P53618	3	3	3	Coatomer subunit beta	COPB1	sp|P53618|COPB_HUMAN Coatomer subunit beta OS=Homo sapiens OX=9606 GN=COPB1 PE=1 SV=3	1	3	3	3	4.6	4.6	4.6	107.14	953	953	0	7.1793	14912000	3				636	5481;7767;8491	True;True;True	5595;7976;8722	7389;10638;11637	7669;11092;12131	7669;11092;12131
P53621	P53621	37	37	37	Coatomer subunit alpha;Xenin;Proxenin	COPA	sp|P53621|COPA_HUMAN Coatomer subunit alpha OS=Homo sapiens OX=9606 GN=COPA PE=1 SV=2	1	37	37	37	47.1	47.1	47.1	138.34	1224	1224	0	311.23	1791900000	48				637	688;885;895;917;1237;1363;1956;2176;2387;2771;2804;2975;3073;3098;3152;4086;4188;4671;4922;4957;5012;5084;5279;5429;6035;6399;6959;7006;7007;7256;7455;7707;7930;7963;8657;8774;8994	True;True;True;True;True;True;True;True;True;True;True;True;True;True;True;True;True;True;True;True;True;True;True;True;True;True;True;True;True;True;True;True;True;True;True;True;True	705;906;917;940;1267;1396;1999;2226;2443;2838;2871;3045;3144;3169;3223;4175;4279;4772;5029;5064;5121;5193;5392;5543;6172;6544;7132;7181;7182;7441;7647;7913;8148;8183;8892;9008;9231	909;1175;1176;1191;1223;1640;1803;2608;2609;2610;2896;3180;3719;3769;4011;4138;4166;4167;4231;4232;5483;5626;6313;6672;6673;6714;6715;6781;6782;6865;7132;7319;8133;8134;8706;9492;9568;9569;9570;9912;10171;10172;10560;10856;10915;11834;11835;11974;11975;12261	934;1207;1208;1209;1224;1257;1694;1863;2714;2715;2716;3019;3313;3873;3924;4173;4307;4336;4337;4403;4404;5689;5833;6550;6933;6934;6976;6977;7043;7044;7129;7408;7595;8444;8445;9063;9883;9960;9961;9962;10327;10599;10600;11009;11314;11379;12331;12332;12472;12473;12765	934;1207;1224;1257;1694;1863;2714;3019;3313;3873;3924;4173;4307;4337;4404;5689;5833;6550;6933;6977;7044;7129;7408;7595;8445;9063;9883;9960;9961;10327;10599;11009;11314;11379;12331;12472;12765
P53675	P53675	19	1	1	Clathrin heavy chain 2	CLTCL1	sp|P53675|CLH2_HUMAN Clathrin heavy chain 2 OS=Homo sapiens OX=9606 GN=CLTCL1 PE=1 SV=2	1	19	1	1	10.8	0.7	0.7	187.03	1640	1640	0	18.68	121760000	1				638	234;316;321;1536;2979;2980;3998;4003;4314;4532;5354;5967;6445;6571;7766;8299;8803;8804;8918	False;False;False;False;False;False;False;False;False;False;False;False;True;False;False;False;False;False;False	242;327;332;1573;3049;3050;4086;4091;4408;4629;5467;6102;6591;6721;7975;8528;9037;9038;9154	306;307;308;413;420;421;2029;2030;4015;4016;5372;5373;5378;5806;5807;6106;7226;8042;8776;8950;10637;11367;12011;12012;12013;12156;12157	312;313;314;315;423;430;431;2103;2104;4178;4179;5576;5577;5583;6017;6018;6332;7502;8347;9138;9316;11091;11852;12509;12510;12511;12656;12657	314;423;431;2104;4178;4179;5577;5583;6018;6332;7502;8347;9138;9316;11091;11852;12509;12511;12657
P53985	P53985	3	3	3	Monocarboxylate transporter 1	SLC16A1	sp|P53985|MOT1_HUMAN Monocarboxylate transporter 1 OS=Homo sapiens OX=9606 GN=SLC16A1 PE=1 SV=3	1	3	3	3	7	7	7	53.944	500	500	0	5.0394	75713000	4				639	1564;1978;6230	True;True;True	1602;2021;6372	2068;2637;2638;8420	2142;2743;2744;8753	2142;2744;8753
P53990	P53990	1	1	1	IST1 homolog	IST1	sp|P53990|IST1_HUMAN IST1 homolog OS=Homo sapiens OX=9606 GN=IST1 PE=1 SV=1	1	1	1	1	5.2	5.2	5.2	39.75	364	364	0	4.2431	3454100	1				640	1779	TRUE	1818	2373	2457	2457
P53992	P53992	5	5	5	Protein transport protein Sec24C	SEC24C	sp|P53992|SC24C_HUMAN Protein transport protein Sec24C OS=Homo sapiens OX=9606 GN=SEC24C PE=1 SV=3	1	5	5	5	6.4	6.4	6.4	118.32	1094	1094	0	4.0049	35521000	5				641	4615;5001;5152;6807;7063	True;True;True;True;True	4714;5110;5262;6973;7239	6220;6769;6950;9277;9659	6454;7031;7219;9649;10060	6454;7031;7219;9649;10060
P54136	P54136	7	7	7	Arginine--tRNA ligase, cytoplasmic	RARS	sp|P54136|SYRC_HUMAN Arginine--tRNA ligase, cytoplasmic OS=Homo sapiens OX=9606 GN=RARS PE=1 SV=2	1	7	7	7	15.2	15.2	15.2	75.378	660	660	0	7.3844	42556000	6				642	89;3989;4027;5085;5670;6794;8230	True;True;True;True;True;True;True	90;4077;4115;5194;5793;6956;8457	116;5358;5410;6866;7644;9252;11278	119;5562;5616;7130;7931;7932;9624;11759	119;5562;5616;7130;7931;9624;11759
P54259	P54259	1	1	1	Atrophin-1	ATN1	sp|P54259|ATN1_HUMAN Atrophin-1 OS=Homo sapiens OX=9606 GN=ATN1 PE=1 SV=3	1	1	1	1	2.3	2.3	2.3	125.41	1190	1190	0.0056022	0.62726	4031700	1				643	3212	TRUE	3284	4321	4495	4495
P54886	P54886	7	7	7	Delta-1-pyrroline-5-carboxylate synthase;Glutamate 5-kinase;Gamma-glutamyl phosphate reductase	ALDH18A1	sp|P54886|P5CS_HUMAN Delta-1-pyrroline-5-carboxylate synthase OS=Homo sapiens OX=9606 GN=ALDH18A1 PE=1 SV=2	1	7	7	7	9.9	9.9	9.9	87.301	795	795	0	12.691	1474500000	8				644	2969;3185;4432;4719;5636;7831;8688	True;True;True;True;True;True;True	3039;3257;4528;4820;5758;8041;8923	4004;4282;5977;6368;7602;10717;11875	4166;4456;6196;6607;6608;7888;11174;12373	4166;4456;6196;6608;7888;11174;12373
P55011	P55011	1	1	1	Solute carrier family 12 member 2	SLC12A2	sp|P55011|S12A2_HUMAN Solute carrier family 12 member 2 OS=Homo sapiens OX=9606 GN=SLC12A2 PE=1 SV=1	1	1	1	1	1.8	1.8	1.8	131.45	1212	1212	0	7.6907	5213900	1				645	0	TRUE	0	0	0	0
P55060	P55060	3	3	3	Exportin-2	CSE1L	sp|P55060|XPO2_HUMAN Exportin-2 OS=Homo sapiens OX=9606 GN=CSE1L PE=1 SV=3	1	3	3	3	4.3	4.3	4.3	110.42	971	971	0	4.2255	14763000	3				646	5017;8384;9044	True;True;True	5126;8614;9283	6788;11484;12334	7050;11972;12843	7050;11972;12843
P55072	P55072	6	6	6	Transitional endoplasmic reticulum ATPase	VCP	sp|P55072|TERA_HUMAN Transitional endoplasmic reticulum ATPase OS=Homo sapiens OX=9606 GN=VCP PE=1 SV=4	1	6	6	6	12.7	12.7	12.7	89.321	806	806	0	12.91	43054000	6				647	1371;1835;4365;4553;5786;6250	True;True;True;True;True;True	1406;1874;4459;4650;5919;6393	1822;2436;5890;6139;7799;8486	1887;2524;6106;6369;8092;8837	1887;2524;6106;6369;8092;8837
P55081	P55081	2	2	2	Microfibrillar-associated protein 1	MFAP1	sp|P55081|MFAP1_HUMAN Microfibrillar-associated protein 1 OS=Homo sapiens OX=9606 GN=MFAP1 PE=1 SV=2	1	2	2	2	8.7	8.7	8.7	51.958	439	439	0	22.991	18240000	2				648	1020;9239	True;True	1043;9481	1360;12564	1405;13079	1405;13079
P55084	P55084	3	3	3	Trifunctional enzyme subunit beta, mitochondrial;3-ketoacyl-CoA thiolase	HADHB	sp|P55084|ECHB_HUMAN Trifunctional enzyme subunit beta, mitochondrial OS=Homo sapiens OX=9606 GN=HADHB PE=1 SV=3	1	3	3	3	9.9	9.9	9.9	51.294	474	474	0	3.233	41194000	2				649	1646;4350;7828	True;True;True	1684;4444;8038	2196;5868;10714	2276;6082;11171	2276;6082;11171
P55209	P55209	3	3	3	Nucleosome assembly protein 1-like 1	NAP1L1	sp|P55209|NP1L1_HUMAN Nucleosome assembly protein 1-like 1 OS=Homo sapiens OX=9606 GN=NAP1L1 PE=1 SV=1	1	3	3	3	10.7	10.7	10.7	45.374	391	391	0	5.9553	21992000	4				650	2796;6425;8992	True;True;True	2863;6570;9229	3755;8742;12259	3910;9099;9100;12763	3910;9100;12763
P55265	P55265	7	7	7	Double-stranded RNA-specific adenosine deaminase	ADAR	sp|P55265|DSRAD_HUMAN Double-stranded RNA-specific adenosine deaminase OS=Homo sapiens OX=9606 GN=ADAR PE=1 SV=4	1	7	7	7	7.5	7.5	7.5	136.06	1226	1226	0	13.189	67840000	5				651	525;1102;3460;3688;7188;7440;9148	True;True;True;True;True;True;True	539;1125;3540;3771;7372;7632;9387	685;1455;4691;4977;9828;10151;12455	700;1500;4876;5168;10239;10579;12966	700;1500;4876;5168;10239;10579;12966
P55735	P55735	1	1	1	Protein SEC13 homolog	SEC13	sp|P55735|SEC13_HUMAN Protein SEC13 homolog OS=Homo sapiens OX=9606 GN=SEC13 PE=1 SV=3	1	1	1	1	8.1	8.1	8.1	35.54	322	322	0	21.522	36285000	1				652	8713	TRUE	8948	11905	12403	12403
P55786	P55786	1	1	1	Puromycin-sensitive aminopeptidase	NPEPPS	sp|P55786|PSA_HUMAN Puromycin-sensitive aminopeptidase OS=Homo sapiens OX=9606 GN=NPEPPS PE=1 SV=2	1	1	1	1	1.4	1.4	1.4	103.28	919	919	0.0007874	1.3662	2982700	1				653	8449	TRUE	8680	11580	12074	12074
P55795	P55795	15	7	6	Heterogeneous nuclear ribonucleoprotein H2	HNRNPH2	sp|P55795|HNRH2_HUMAN Heterogeneous nuclear ribonucleoprotein H2 OS=Homo sapiens OX=9606 GN=HNRNPH2 PE=1 SV=1	1	15	7	6	46.3	28.1	23.4	49.263	449	449	0	56.048	286730000	7				654	715;1194;1664;2204;2577;2869;2873;3366;7140;7319;8312;8741;9046;9095;9252	True;False;True;False;True;False;True;False;True;False;False;True;True;False;False	732;1220;1702;2254;2637;2937;2941;3444;7322;7510;8541;9285;9334;9494	940;941;1580;1581;2215;2216;2928;3431;3853;3859;4552;4553;9768;10001;10002;11384;11385;11386;12336;12394;12578;12579	965;966;1630;1631;2296;2297;3051;3569;4008;4014;4731;4732;4733;10175;10424;10425;11869;11870;11871;11872;12845;12905;13093;13094	965;1630;2296;3051;3569;4008;4014;4732;10175;10424;11871;12845;12905;13093
P55884	P55884	22	22	22	Eukaryotic translation initiation factor 3 subunit B	EIF3B	sp|P55884|EIF3B_HUMAN Eukaryotic translation initiation factor 3 subunit B OS=Homo sapiens OX=9606 GN=EIF3B PE=1 SV=3	1	22	22	22	39.6	39.6	39.6	92.48	814	814	0	137.59	743370000	27				655	591;1293;1298;2011;2140;2425;2680;2775;3071;3076;3147;3933;5532;5704;5945;6222;6468;7549;8755;9167;9259;9262	True;True;True;True;True;True;True;True;True;True;True;True;True;True;True;True;True;True;True;True;True;True	607;1324;1329;2055;2190;2482;2741;2842;3142;3147;3218;4021;5646;5829;6080;6364;6614;7749;8989;9407;9501;9504	773;1713;1719;1720;2677;2852;3227;3228;3564;3725;4136;4141;4142;4226;5285;5286;7452;7691;8009;8410;8806;10318;10319;11953;12477;12587;12588;12591	788;1772;1778;1779;2783;2971;3362;3363;3707;3880;4305;4310;4311;4398;5489;5490;7734;7980;8309;8742;9168;10756;10757;12451;12988;13102;13103;13106	788;1772;1779;2783;2971;3363;3707;3880;4305;4311;4398;5489;7734;7980;8309;8742;9168;10757;12451;12988;13102;13106
P56134	P56134	2	2	2	ATP synthase subunit f, mitochondrial	ATP5J2	sp|P56134|ATPK_HUMAN ATP synthase subunit f, mitochondrial OS=Homo sapiens OX=9606 GN=ATP5MF PE=1 SV=3	1	2	2	2	25.5	25.5	25.5	10.918	94	94	0	2.7945	11129000	2				656	1021;4670	True;True	1044;4771	1361;6312	1406;6549	1406;6549
P56182	P56182	2	2	2	Ribosomal RNA processing protein 1 homolog A	RRP1	sp|P56182|RRP1_HUMAN Ribosomal RNA processing protein 1 homolog A OS=Homo sapiens OX=9606 GN=RRP1 PE=1 SV=1	1	2	2	2	9.5	9.5	9.5	52.839	461	461	0	8.1822	13102000	2				657	186;8257	True;True	192;8484	245;11312	249;11795	249;11795
P56192	P56192	5	5	5	Methionine--tRNA ligase, cytoplasmic	MARS	sp|P56192|SYMC_HUMAN Methionine--tRNA ligase, cytoplasmic OS=Homo sapiens OX=9606 GN=MARS PE=1 SV=2	1	5	5	5	9.1	9.1	9.1	101.11	900	900	0	18.374	33567000	5				658	198;2196;3969;4654;6023	True;True;True;True;True	205;2246;4057;4755;6160	263;2919;5333;6289;8118	267;3042;5537;6524;8429	267;3042;5537;6524;8429
P56199	P56199	7	7	7	Integrin alpha-1	ITGA1	sp|P56199|ITA1_HUMAN Integrin alpha-1 OS=Homo sapiens OX=9606 GN=ITGA1 PE=1 SV=2	1	7	7	7	11.3	11.3	11.3	130.85	1179	1179	0	17.834	152490000	6				659	1192;2426;4232;7681;8549;8962;9228	True;True;True;True;True;True;True	1218;2483;4323;7886;8783;9198;9470	1578;3229;5683;10520;11704;12206;12553	1628;3364;5891;10967;12199;12709;13068	1628;3364;5891;10967;12199;12709;13068
P56537	P56537	1	1	1	Eukaryotic translation initiation factor 6	EIF6	sp|P56537|IF6_HUMAN Eukaryotic translation initiation factor 6 OS=Homo sapiens OX=9606 GN=EIF6 PE=1 SV=1	1	1	1	1	9.8	9.8	9.8	26.599	245	245	0	29.369	22664000	2				660	7897	TRUE	8112	10811;10812	11269;11270	11270
P56545	P56545	1	1	1	C-terminal-binding protein 2	CTBP2	sp|P56545|CTBP2_HUMAN C-terminal-binding protein 2 OS=Homo sapiens OX=9606 GN=CTBP2 PE=1 SV=1	1	1	1	1	4.5	4.5	4.5	48.944	445	445	0	12.438	12683000	2				661	2531	TRUE	2589	3370;3371	3508;3509	3508
P56589	P56589	1	1	1	Peroxisomal biogenesis factor 3	PEX3	sp|P56589|PEX3_HUMAN Peroxisomal biogenesis factor 3 OS=Homo sapiens OX=9606 GN=PEX3 PE=1 SV=1	1	1	1	1	4.6	4.6	4.6	42.139	373	373	0	2.6518	5308600	1				662	1483	TRUE	1520	1960	2032	2032
P57088	P57088	1	1	1	Transmembrane protein 33	TMEM33	sp|P57088|TMM33_HUMAN Transmembrane protein 33 OS=Homo sapiens OX=9606 GN=TMEM33 PE=1 SV=2	1	1	1	1	4.9	4.9	4.9	27.978	247	247	0	3.1312	11536000	1				663	442	TRUE	455	584	597	597
P57721	P57721	3	1	1	Poly(rC)-binding protein 3	PCBP3	sp|P57721|PCBP3_HUMAN Poly(rC)-binding protein 3 OS=Homo sapiens OX=9606 GN=PCBP3 PE=2 SV=2	1	3	1	1	11.6	3.2	3.2	39.465	371	371	0	7.6336	43143000	1				664	1994;3805;6352	False;False;True	2038;3893;6497	2656;2657;5130;8638	2762;2763;5324;8995	2762;5324;8995
P58107	P58107	15	9	9	Epiplakin	EPPK1	sp|P58107|EPIPL_HUMAN Epiplakin OS=Homo sapiens OX=9606 GN=EPPK1 PE=1 SV=3	1	15	9	9	23.2	16.1	16.1	555.65	5088	5088	0	32.134	97288000	9				665	297;814;1581;1662;2658;3138;4700;4906;4907;5731;6535;6567;8405;8620;9131	True;True;True;True;False;False;True;False;False;True;True;True;False;False;True	307;834;1619;1700;2719;3209;4801;5011;5012;5858;6684;6717;8636;8854;9370	388;1090;2120;2212;3536;4213;6349;6627;6628;6629;6630;6631;6632;7725;8903;8944;11527;11791;12437	398;1119;2198;2293;3677;4385;6587;6884;6885;6886;6887;6888;6889;8017;9269;9310;12020;12288;12948	398;1119;2198;2293;3677;4385;6587;6886;6887;8017;9269;9310;12020;12288;12948
P60228	P60228	16	16	16	Eukaryotic translation initiation factor 3 subunit E	EIF3E	sp|P60228|EIF3E_HUMAN Eukaryotic translation initiation factor 3 subunit E OS=Homo sapiens OX=9606 GN=EIF3E PE=1 SV=1	1	16	16	16	43.8	43.8	43.8	52.22	445	445	0	97.337	622240000	23				666	204;3285;4431;4501;4607;4689;4848;5102;5662;5988;6813;7216;7960;8523;8911;9155	True;True;True;True;True;True;True;True;True;True;True;True;True;True;True;True	211;3360;4527;4597;4706;4790;4950;5211;5785;6123;6979;7400;8180;8754;9147;9394	270;4429;4430;5975;5976;6064;6211;6337;6338;6527;6528;6886;7633;8069;8070;9284;9860;10912;11673;12147;12463	274;4607;4608;4609;6194;6195;6289;6444;6575;6576;6773;6774;6775;7151;7920;8378;8379;9656;10272;11376;12167;12647;12974	274;4607;6194;6289;6444;6576;6775;7151;7920;8378;9656;10272;11376;12167;12647;12974
P60660;P14649	P60660	5;1	5;1	5;1	Myosin light polypeptide 6	MYL6	sp|P60660|MYL6_HUMAN Myosin light polypeptide 6 OS=Homo sapiens OX=9606 GN=MYL6 PE=1 SV=2	2	5	5	5	43	43	43	16.93	151	151;208	0	31.104	107470000	6				667	427;853;3386;5909;8428	True;True;True;True;True	440;874;3465;6043;8659	565;1141;4594;7957;11555;11556	578;1172;4775;8257;12049;12050	578;1172;4775;8257;12050
P60709;Q562R1;Q9BYX7	P60709	21;5;3	1;0;0	1;0;0	Actin, cytoplasmic 1;Actin, cytoplasmic 1, N-terminally processed	ACTB	sp|P60709|ACTB_HUMAN Actin, cytoplasmic 1 OS=Homo sapiens OX=9606 GN=ACTB PE=1 SV=1	3	21	1	1	70.9	4.5	4.5	41.736	375	375;376;375	0	16.751	74004000	1				668	263;772;859;893;968;1211;1221;1341;1342;1725;1745;3155;3324;3623;4023;4085;4481;6309;7410;7934;8099	False;False;False;False;True;False;False;False;False;False;False;False;False;False;False;False;False;False;False;False;False	272;790;880;914;915;991;1237;1238;1248;1249;1373;1374;1763;1783;3226;3400;3401;3703;4111;4174;4577;6453;7602;8152;8153;8322	348;1026;1027;1147;1186;1187;1188;1189;1293;1602;1603;1604;1615;1616;1617;1618;1776;1777;2297;2323;4239;4490;4491;4492;4891;5401;5402;5403;5481;5482;6034;6035;6036;6037;8578;8579;10111;10112;10860;10861;10862;10863;10864;10865;10866;11105;11106	357;358;1053;1054;1178;1219;1220;1221;1222;1332;1652;1653;1654;1655;1666;1667;1668;1669;1670;1836;1837;2379;2380;2406;4411;4412;4669;4670;4671;5080;5606;5607;5608;5609;5687;5688;6257;6258;6259;6260;6261;8934;8935;10537;10538;10539;11318;11319;11320;11321;11322;11323;11324;11578;11579	357;1054;1178;1220;1332;1652;1670;1836;1837;2380;2406;4411;4671;5080;5608;5688;6258;8935;10537;11319;11578	135;136;137;138;139		44;153;190;283;305
P60842	P60842	17	17	11	Eukaryotic initiation factor 4A-I	EIF4A1	sp|P60842|IF4A1_HUMAN Eukaryotic initiation factor 4A-I OS=Homo sapiens OX=9606 GN=EIF4A1 PE=1 SV=1	1	17	17	11	51.5	51.5	31.8	46.153	406	406	0	110.07	954010000	21				669	731;1089;1281;1586;2683;2780;2812;3078;3134;4098;4149;5111;5213;5605;6323;8468;8824	True;True;True;True;True;True;True;True;True;True;True;True;True;True;True;True;True	749;1112;1312;1624;2744;2847;2879;3149;3205;4188;4239;5220;5325;5721;6468;8699;9058	969;1442;1697;2127;3567;3568;3731;3732;3781;4144;4209;5502;5575;6895;6896;7047;7048;7548;8596;11610;12034	995;1487;1754;2205;3710;3711;3886;3887;3936;4313;4381;5709;5782;7160;7161;7319;7320;7831;7832;8952;12104;12532	995;1487;1754;2205;3711;3886;3936;4313;4381;5709;5782;7161;7320;7832;8952;12104;12532
P60866	P60866	5	5	5	40S ribosomal protein S20	RPS20	sp|P60866|RS20_HUMAN 40S ribosomal protein S20 OS=Homo sapiens OX=9606 GN=RPS20 PE=1 SV=1	1	5	5	5	29.4	29.4	29.4	13.373	119	119	0	20.632	526960000	6				670	1348;4778;6641;7851;8124	True;True;True;True;True	1380;4880;6793;8062;8347	1785;6439;9045;9046;10746;10747;11136	1845;6683;9412;9413;11204;11205;11610	1845;6683;9413;11204;11610
P60903	P60903	1	1	1	Protein S100-A10	S100A10	sp|P60903|S10AA_HUMAN Protein S100-A10 OS=Homo sapiens OX=9606 GN=S100A10 PE=1 SV=2	1	1	1	1	17.5	17.5	17.5	11.203	97	97	0.0081744	0.52404	10012000	1				671	1624	TRUE	1662	2173	2253	2253
P61026	P61026	1	1	1	Ras-related protein Rab-10	RAB10	sp|P61026|RAB10_HUMAN Ras-related protein Rab-10 OS=Homo sapiens OX=9606 GN=RAB10 PE=1 SV=1	1	1	1	1	5.5	5.5	5.5	22.541	200	200	0.00080257	1.4783	5518200	1				672	233	TRUE	241	305	311	311
P61158;Q9P1U1;Q9C0K3	P61158;Q9P1U1	3;2;1	3;2;1	3;2;1	Actin-related protein 3;Actin-related protein 3B	ACTR3;ACTR3B	sp|P61158|ARP3_HUMAN Actin-related protein 3 OS=Homo sapiens OX=9606 GN=ACTR3 PE=1 SV=3;sp|Q9P1U1|ARP3B_HUMAN Actin-related protein 3B OS=Homo sapiens OX=9606 GN=ACTR3B PE=2 SV=1	3	3	3	3	12	12	12	47.371	418	418;418;210	0	7.5735	22167000	3				673	1119;5269;7779	True;True;True	1142;5382;7988	1473;7117;10654	1518;7389;11110	1518;7389;11110
P61160	P61160	2	2	2	Actin-related protein 2	ACTR2	sp|P61160|ARP2_HUMAN Actin-related protein 2 OS=Homo sapiens OX=9606 GN=ACTR2 PE=1 SV=1	1	2	2	2	7.9	7.9	7.9	44.76	394	394	0	7.4704	36944000	3				674	3129;3245	True;True	3200;3319	4202;4203;4369	4373;4374;4545	4374;4545
P61221	P61221	7	7	7	ATP-binding cassette sub-family E member 1	ABCE1	sp|P61221|ABCE1_HUMAN ATP-binding cassette sub-family E member 1 OS=Homo sapiens OX=9606 GN=ABCE1 PE=1 SV=1	1	7	7	7	18.2	18.2	18.2	67.314	599	599	0	30.917	160890000	10				675	117;351;1649;4857;6163;7853;8087	True;True;True;True;True;True;True	118;362;1687;4960;6304;8064;8310	147;462;463;2199;6558;8329;10749;10750;11092	150;473;474;2279;2280;6815;8659;11207;11208;11565	150;474;2280;6815;8659;11207;11565
P61247	P61247	15	15	15	40S ribosomal protein S3a	RPS3A	sp|P61247|RS3A_HUMAN 40S ribosomal protein S3a OS=Homo sapiens OX=9606 GN=RPS3A PE=1 SV=2	1	15	15	15	52.7	52.7	52.7	29.945	264	264	0	190.73	2808500000	22				676	98;112;547;1413;2078;4338;4591;4805;5066;5683;5797;8227;8228;8795;8943	True;True;True;True;True;True;True;True;True;True;True;True;True;True;True	99;113;561;1448;2125;4432;4690;4907;5175;5806;5930;8454;8455;9029;9179	126;140;141;709;1869;2766;5849;5850;6194;6470;6471;6845;7659;7810;7811;7812;11273;11274;11275;11276;12001;12184	129;143;144;724;1935;2875;6062;6063;6427;6714;6715;7107;7947;8103;8104;8105;11752;11753;11754;11755;11756;11757;12499;12685	129;143;724;1935;2875;6062;6427;6715;7107;7947;8104;11754;11757;12499;12685
P61254;Q9UNX3	P61254;Q9UNX3	5;4	5;4	5;4	60S ribosomal protein L26;60S ribosomal protein L26-like 1	RPL26;RPL26L1	sp|P61254|RL26_HUMAN 60S ribosomal protein L26 OS=Homo sapiens OX=9606 GN=RPL26 PE=1 SV=1;sp|Q9UNX3|RL26L_HUMAN 60S ribosomal protein L26-like 1 OS=Homo sapiens OX=9606 GN=RPL26L1 PE=1 SV=1	2	5	5	5	33.8	33.8	33.8	17.258	145	145;145	0	3.4645	182540000	6				677	531;2368;3197;4080;4349	True;True;True;True;True	545;2423;3269;4169;4443	691;692;3150;4298;5473;5866;5867	706;707;3281;4472;5679;6080;6081	706;3281;4472;5679;6081
P61313	P61313	2	2	2	60S ribosomal protein L15	RPL15	sp|P61313|RL15_HUMAN 60S ribosomal protein L15 OS=Homo sapiens OX=9606 GN=RPL15 PE=1 SV=2	1	2	2	2	11.3	11.3	11.3	24.146	204	204	0	4.3069	9943400	2				678	7090;8481	True;True	7268;8712	9693;11625	10095;12119	10095;12119
P61353	P61353	4	4	4	60S ribosomal protein L27	RPL27	sp|P61353|RL27_HUMAN 60S ribosomal protein L27 OS=Homo sapiens OX=9606 GN=RPL27 PE=1 SV=2	1	4	4	4	36	36	36	15.798	136	136	0	17.84	618270000	7				679	5880;8823;8875;9232	True;True;True;True	6014;9057;9110;9474	7922;7923;12033;12101;12102;12557	8220;8221;8222;12531;12601;12602;13072	8221;12531;12601;13072
P61513;A6NKH3	P61513;A6NKH3	2;1	2;1	2;1	60S ribosomal protein L37a;Putative 60S ribosomal protein L37a-like protein	RPL37A;RPL37AP8	sp|P61513|RL37A_HUMAN 60S ribosomal protein L37a OS=Homo sapiens OX=9606 GN=RPL37A PE=1 SV=2;sp|A6NKH3|RL37L_HUMAN Putative 60S ribosomal protein L37a-like protein OS=Homo sapiens OX=9606 GN=RPL37AP8 PE=5 SV=2	2	2	2	2	28.3	28.3	28.3	10.275	92	92;93	0	11.666	32643000	2				680	7964;9235	True;True	8184;9477	10916;12560	11380;13075	11380;13075
P61604	P61604	1	1	1	10 kDa heat shock protein, mitochondrial	HSPE1	sp|P61604|CH10_HUMAN 10 kDa heat shock protein, mitochondrial OS=Homo sapiens OX=9606 GN=HSPE1 PE=1 SV=2	1	1	1	1	13.7	13.7	13.7	10.932	102	102	0.0056101	0.63039	7231300	0				681	8490	TRUE	8721	11636	12130	12130
P61619;Q9H9S3	P61619	4;1	4;1	4;1	Protein transport protein Sec61 subunit alpha isoform 1	SEC61A1	sp|P61619|S61A1_HUMAN Protein transport protein Sec61 subunit alpha isoform 1 OS=Homo sapiens OX=9606 GN=SEC61A1 PE=1 SV=2	2	4	4	4	13.2	13.2	13.2	52.264	476	476;476	0	18.101	133590000	6				682	238;2309;2423;3636	True;True;True;True	246;2362;2480;3716	312;3069;3070;3223;3224;4906	319;3196;3197;3358;3359;5095	319;3197;3358;5095
P61803	P61803	1	1	1	Dolichyl-diphosphooligosaccharide--protein glycosyltransferase subunit DAD1	DAD1	sp|P61803|DAD1_HUMAN Dolichyl-diphosphooligosaccharide--protein glycosyltransferase subunit DAD1 OS=Homo sapiens OX=9606 GN=DAD1 PE=1 SV=3	1	1	1	1	8.8	8.8	8.8	12.497	113	113	0.0094467	0.48148	10588000	1				683	6766	TRUE	6928	9217	9588	9588
P61962	P61962	3	3	3	DDB1- and CUL4-associated factor 7	DCAF7	sp|P61962|DCAF7_HUMAN DDB1- and CUL4-associated factor 7 OS=Homo sapiens OX=9606 GN=DCAF7 PE=1 SV=1	1	3	3	3	13.7	13.7	13.7	38.926	342	342	0	12.604	60529000	4				684	3117;3256;4396	True;True;True	3188;3330;4491	4187;4381;4382;5927	4357;4557;4558;6145	4357;4557;6145
P61964	P61964	2	2	2	WD repeat-containing protein 5	WDR5	sp|P61964|WDR5_HUMAN WD repeat-containing protein 5 OS=Homo sapiens OX=9606 GN=WDR5 PE=1 SV=1	1	2	2	2	12	12	12	36.588	334	334	0.00818	0.52406	10935000	2				685	629;7756	True;True	646;7964	822;10619	838;11069	838;11069
P61978	P61978	19	19	19	Heterogeneous nuclear ribonucleoprotein K	HNRNPK	sp|P61978|HNRPK_HUMAN Heterogeneous nuclear ribonucleoprotein K OS=Homo sapiens OX=9606 GN=HNRNPK PE=1 SV=1	1	19	19	19	51.6	51.6	51.6	50.976	463	463	0	201.21	5075800000	28				686	1153;1418;3015;3045;3652;3663;3674;3761;3762;4167;4630;4963;5588;5959;6662;6663;7513;8797;8816	True;True;True;True;True;True;True;True;True;True;True;True;True;True;True;True;True;True;True	1177;1453;3086;3116;3732;3743;3744;3756;3846;3847;4257;4258;4730;5070;5703;6094;6817;6818;6819;7710;9031;9050	1526;1876;4060;4096;4097;4922;4937;4938;4939;4940;4941;4957;4958;4959;5067;5068;5069;5070;5596;5597;6243;6721;6722;7525;8025;8026;9079;9080;9081;9082;10264;10265;12003;12026	1572;1942;4225;4263;4264;5112;5113;5128;5129;5130;5131;5132;5148;5149;5150;5260;5261;5262;5263;5803;5804;6477;6983;6984;7808;8325;8326;9447;9448;9449;9450;10699;10700;10701;12501;12524	1572;1942;4225;4263;5112;5129;5149;5261;5262;5803;6477;6984;7808;8325;9447;9450;10699;12501;12524	140	20	27	116
P61981	P61981	4	2	2	14-3-3 protein gamma;14-3-3 protein gamma, N-terminally processed	YWHAG	sp|P61981|1433G_HUMAN 14-3-3 protein gamma OS=Homo sapiens OX=9606 GN=YWHAG PE=1 SV=2	1	4	2	2	22.7	15.4	15.4	28.302	247	247	0	7.9478	84801000	3				687	1336;1782;5953;7441	False;True;False;True	1368;1821;6088;7633	1770;2376;2377;8018;10152	1830;2460;2461;8318;10580	1830;2460;8318;10580
P62081	P62081	9	9	9	40S ribosomal protein S7	RPS7	sp|P62081|RS7_HUMAN 40S ribosomal protein S7 OS=Homo sapiens OX=9606 GN=RPS7 PE=1 SV=1	1	9	9	9	56.7	56.7	56.7	22.127	194	194	0	106.69	1634800000	17				688	350;631;1388;1826;3388;3996;4059;7777;8214	True;True;True;True;True;True;True;True;True	361;648;1423;1865;3467;4084;4147;7986;8440	461;824;825;826;1839;2427;4597;5367;5368;5369;5446;5447;10649;10650;10651;10652;11252	472;840;841;842;1904;1905;2515;4778;5571;5572;5573;5652;5653;11105;11106;11107;11108;11730	472;842;1904;2515;4778;5572;5652;11106;11730
P62140	P62140	11	11	3	Serine/threonine-protein phosphatase PP1-beta catalytic subunit	PPP1CB	sp|P62140|PP1B_HUMAN Serine/threonine-protein phosphatase PP1-beta catalytic subunit OS=Homo sapiens OX=9606 GN=PPP1CB PE=1 SV=3	1	11	11	3	39.8	39.8	12.2	37.186	327	327	0	62.047	396800000	11				689	108;325;1707;3104;3463;3548;3687;4034;7235;7582;9183	True;True;True;True;True;True;True;True;True;True;True	109;336;1745;3175;3543;3628;3770;4122;7420;7784;9423	136;426;2275;2276;4174;4694;4793;4794;4976;5417;9887;10363;10364;12497	139;436;2357;2358;4344;4879;4978;4979;5167;5623;10300;10802;10803;13009	139;436;2357;4344;4879;4978;5167;5623;10300;10802;13009
P62195	P62195	2	2	2	26S protease regulatory subunit 8	PSMC5	sp|P62195|PRS8_HUMAN 26S proteasome regulatory subunit 8 OS=Homo sapiens OX=9606 GN=PSMC5 PE=1 SV=1	1	2	2	2	9.4	9.4	9.4	45.626	406	406	0	4.8438	13857000	2				690	2063;7794	True;True	2110;8003	2748;10671	2857;11127	2857;11127
P62241	P62241	7	7	7	40S ribosomal protein S8	RPS8	sp|P62241|RS8_HUMAN 40S ribosomal protein S8 OS=Homo sapiens OX=9606 GN=RPS8 PE=1 SV=2	1	7	7	7	41.8	41.8	41.8	24.205	208	208	0	75.936	2222600000	9				691	1789;3631;4516;4873;5386;5795;6545	True;True;True;True;True;True;True	1828;3711;4612;4976;5499;5928;6694	2386;4899;4900;6079;6582;7261;7808;8915;8916	2472;5088;5089;6304;6839;7537;8101;9281;9282	2472;5089;6304;6839;7537;8101;9282
P62244	P62244	3	3	3	40S ribosomal protein S15a	RPS15A	sp|P62244|RS15A_HUMAN 40S ribosomal protein S15a OS=Homo sapiens OX=9606 GN=RPS15A PE=1 SV=2	1	3	3	3	20.8	20.8	20.8	14.839	130	130	0	40.68	195100000	3				692	2335;3227;3725	True;True;True	2388;3299;3809	3102;4340;5023	3229;4516;5215	3229;4516;5215
P62249	P62249	7	7	7	40S ribosomal protein S16	RPS16	sp|P62249|RS16_HUMAN 40S ribosomal protein S16 OS=Homo sapiens OX=9606 GN=RPS16 PE=1 SV=2	1	7	7	7	38.4	38.4	38.4	16.445	146	146	0	15.997	859890000	8				693	502;1098;1712;2115;4930;7745;8555	True;True;True;True;True;True;True	515;1121;1750;2164;5037;7952;8789	652;1451;2282;2814;6681;6682;10603;11710	665;1496;2364;2926;6942;6943;11053;12205	665;1496;2364;2926;6942;11053;12205
P62258	P62258	5	3	3	14-3-3 protein epsilon	YWHAE	sp|P62258|1433E_HUMAN 14-3-3 protein epsilon OS=Homo sapiens OX=9606 GN=YWHAE PE=1 SV=1	1	5	3	3	23.9	16.9	16.9	29.174	255	255	0	16.302	82363000	5				694	26;1336;4774;5545;5953	True;False;True;True;False	27;1368;4876;5660;6088	30;31;1770;6434;7473;8018	30;31;1830;6676;6677;7756;8318	30;1830;6677;7756;8318
P62263	P62263	6	6	6	40S ribosomal protein S14	RPS14	sp|P62263|RS14_HUMAN 40S ribosomal protein S14 OS=Homo sapiens OX=9606 GN=RPS14 PE=1 SV=3	1	6	6	6	31.1	31.1	31.1	16.273	151	151	0	36.04	589910000	7				695	135;993;1802;3502;3503;8386	True;True;True;True;True;True	138;1016;1841;3582;3583;8616	179;180;1327;2399;2400;4739;4740;11486	182;183;1368;2485;2486;4924;4925;11974	183;1368;2485;4924;4925;11974
P62266	P62266	3	3	3	40S ribosomal protein S23	RPS23	sp|P62266|RS23_HUMAN 40S ribosomal protein S23 OS=Homo sapiens OX=9606 GN=RPS23 PE=1 SV=3	1	3	3	3	35	35	35	15.807	143	143	0	3.847	261520000	4				696	3942;4138;8096	True;True;True	4030;4228;8319	5297;5298;5560;11102	5501;5502;5767;11575	5502;5767;11575
P62269	P62269	9	9	9	40S ribosomal protein S18	RPS18	sp|P62269|RS18_HUMAN 40S ribosomal protein S18 OS=Homo sapiens OX=9606 GN=RPS18 PE=1 SV=3	1	9	9	9	38.2	38.2	38.2	17.718	152	152	0	17.078	662930000	11				697	259;2394;3203;3420;3819;4155;6561;8482;8975	True;True;True;True;True;True;True;True;True	268;2450;3275;3500;3907;4245;6711;8713;9211	342;3188;4307;4644;4645;5147;5581;5582;8937;11626;12227	350;3321;4481;4825;4826;5341;5342;5788;5789;9303;12120;12731	350;3321;4481;4825;5341;5788;9303;12120;12731
P62273	P62273	1	1	1	40S ribosomal protein S29	RPS29	sp|P62273|RS29_HUMAN 40S ribosomal protein S29 OS=Homo sapiens OX=9606 GN=RPS29 PE=1 SV=2	1	1	1	1	19.6	19.6	19.6	6.6767	56	56	0.0022206	0.9007	5881700	1				698	2767	TRUE	2834	3714	3868	3868
P62277	P62277	7	7	7	40S ribosomal protein S13	RPS13	sp|P62277|RS13_HUMAN 40S ribosomal protein S13 OS=Homo sapiens OX=9606 GN=RPS13 PE=1 SV=2	1	7	7	7	45	45	45	17.222	151	151	0	27.994	942990000	9				699	2826;2887;2890;4142;4799;5398;9031	True;True;True;True;True;True;True	2893;2955;2958;4232;4901;5511;9269	3798;3799;3890;3893;5566;5567;6464;7276;12315;12316	3953;3954;4051;4054;5773;5774;6708;7552;12823;12824	3954;4051;4054;5774;6708;7552;12823
P62280	P62280	11	11	11	40S ribosomal protein S11	RPS11	sp|P62280|RS11_HUMAN 40S ribosomal protein S11 OS=Homo sapiens OX=9606 GN=RPS11 PE=1 SV=3	1	11	11	11	51.3	51.3	51.3	18.431	158	158	0	17.734	586970000	9				700	894;1397;1398;1470;1471;3760;4076;5887;6002;6463;6573	True;True;True;True;True;True;True;True;True;True;True	916;1432;1433;1507;1508;3845;4164;6021;6139;6609;6723	1190;1849;1850;1945;1946;5066;5466;7930;8095;8800;8952	1223;1915;1916;2017;2018;5259;5672;8229;8405;9162;9318	1223;1915;1916;2017;2018;5259;5672;8229;8405;9162;9318
P62314	P62314	3	3	3	Small nuclear ribonucleoprotein Sm D1	SNRPD1	sp|P62314|SMD1_HUMAN Small nuclear ribonucleoprotein Sm D1 OS=Homo sapiens OX=9606 GN=SNRPD1 PE=1 SV=1	1	3	3	3	43.7	43.7	43.7	13.281	119	119	0	18.038	43639000	3				701	5286;5860;9038	True;True;True	5399;5993;9277	7141;7891;12326	7417;8186;12835	7417;8186;12835
P62316	P62316	1	1	1	Small nuclear ribonucleoprotein Sm D2	SNRPD2	sp|P62316|SMD2_HUMAN Small nuclear ribonucleoprotein Sm D2 OS=Homo sapiens OX=9606 GN=SNRPD2 PE=1 SV=1	1	1	1	1	16.1	16.1	16.1	13.527	118	118	0.0029049	0.79739	10063000	1				702	6578	TRUE	6728	8957	9323	9323
P62318	P62318	1	1	1	Small nuclear ribonucleoprotein Sm D3	SNRPD3	sp|P62318|SMD3_HUMAN Small nuclear ribonucleoprotein Sm D3 OS=Homo sapiens OX=9606 GN=SNRPD3 PE=1 SV=1	1	1	1	1	16.7	16.7	16.7	13.916	126	126	0	7.9324	97129000	3				703	8458	TRUE	8689	11591;11592;11593	12085;12086;12087	12087
P62333	P62333	1	1	1	26S protease regulatory subunit 10B	PSMC6	sp|P62333|PRS10_HUMAN 26S proteasome regulatory subunit 10B OS=Homo sapiens OX=9606 GN=PSMC6 PE=1 SV=1	1	1	1	1	3.6	3.6	3.6	44.172	389	389	0	5.4341	24283000	1				704	480	TRUE	493	625	638	638
P62424	P62424	15	15	15	60S ribosomal protein L7a	RPL7A	sp|P62424|RL7A_HUMAN 60S ribosomal protein L7a OS=Homo sapiens OX=9606 GN=RPL7A PE=1 SV=2	1	15	15	15	38	38	38	29.995	266	266	0	80.113	944040000	18				705	303;304;4231;4295;4296;4332;4868;5624;5834;7483;7484;7817;8098;8604;8827	True;True;True;True;True;True;True;True;True;True;True;True;True;True;True	314;315;4322;4388;4389;4426;4971;5745;5967;7676;7677;8027;8321;8838;9061	399;400;5682;5781;5782;5783;5840;6575;6576;7583;7859;10211;10212;10213;10701;11104;11769;12037	409;410;5890;5992;5993;5994;6053;6832;6833;7869;8152;10642;10643;10644;11158;11577;12266;12535	409;410;5890;5992;5993;6053;6833;7869;8152;10642;10644;11158;11577;12266;12535
P62495	P62495	3	3	3	Eukaryotic peptide chain release factor subunit 1	ETF1	sp|P62495|ERF1_HUMAN Eukaryotic peptide chain release factor subunit 1 OS=Homo sapiens OX=9606 GN=ETF1 PE=1 SV=3	1	3	3	3	8.7	8.7	8.7	49.03	437	437	0	7.11	35851000	1				706	2256;5334;8997	True;True;True	2308;5447;9234	3007;7200;12265	3133;7476;12769	3133;7476;12769
P62701;P22090;Q8TD47	P62701	19;8;7	19;8;7	19;8;7	40S ribosomal protein S4, X isoform	RPS4X	sp|P62701|RS4X_HUMAN 40S ribosomal protein S4, X isoform OS=Homo sapiens OX=9606 GN=RPS4X PE=1 SV=2	3	19	19	19	60.1	60.1	60.1	29.597	263	263;263;263	0	97.457	2431200000	29				707	948;1519;1954;2169;2797;2918;3312;3391;3603;3944;5247;5307;5365;5368;7496;8551;8668;8980;8981	True;True;True;True;True;True;True;True;True;True;True;True;True;True;True;True;True;True;True	971;1556;1997;2219;2864;2988;3387;3470;3683;4032;5359;5420;5478;5481;7689;7690;8785;8903;9217;9218	1269;2009;2604;2605;2606;2888;3756;3757;3939;3940;4473;4474;4602;4864;5300;7088;7089;7168;7169;7237;7240;10230;10231;10232;11706;11850;12243;12244	1307;2082;2083;2710;2711;2712;3011;3911;3912;4101;4102;4652;4653;4783;5050;5504;7360;7361;7444;7445;7513;7516;10662;10663;10664;10665;12201;12348;12747;12748	1307;2083;2711;3011;3912;4102;4653;4783;5050;5504;7360;7444;7513;7516;10664;12201;12348;12747;12748	141		87
P67775;P62714;P60510	P67775;P62714	3;3;1	3;3;1	3;3;1	Serine/threonine-protein phosphatase 2A catalytic subunit alpha isoform;Serine/threonine-protein phosphatase 2A catalytic subunit beta isoform	PPP2CA;PPP2CB	sp|P67775|PP2AA_HUMAN Serine/threonine-protein phosphatase 2A catalytic subunit alpha isoform OS=Homo sapiens OX=9606 GN=PPP2CA PE=1 SV=1;sp|P62714|PP2AB_HUMAN Serine/threonine-protein phosphatase 2A catalytic subunit beta isoform OS=Homo sapiens OX=9606 G	3	3	3	3	16.2	16.2	16.2	35.594	309	309;309;307	0	16.6	31142000	3				708	2549;6376;9218	True;True;True	2607;6521;9460	3393;8675;12541	3531;9032;13056	3531;9032;13056
P62750	P62750	7	7	7	60S ribosomal protein L23a	RPL23A	sp|P62750|RL23A_HUMAN 60S ribosomal protein L23a OS=Homo sapiens OX=9606 GN=RPL23A PE=1 SV=1	1	7	7	7	41.7	41.7	41.7	17.695	156	156	0	19.061	409000000	8				709	2380;3500;4159;4407;4493;5495;8570	True;True;True;True;True;True;True	2435;3580;4249;4502;4589;5609;8804	3166;4737;5586;5587;5941;6055;7406;11731	3297;4922;5793;5794;6160;6280;7688;12226	3297;4922;5793;6160;6280;7688;12226
P62753	P62753	6	6	6	40S ribosomal protein S6	RPS6	sp|P62753|RS6_HUMAN 40S ribosomal protein S6 OS=Homo sapiens OX=9606 GN=RPS6 PE=1 SV=1	1	6	6	6	28.1	28.1	28.1	28.68	249	249	0	31.332	1141700000	7				710	1106;2583;4623;4786;5096;5534	True;True;True;True;True;True	1129;2643;4722;4888;5205;5648;5649	1459;3438;6229;6450;6879;7454;7455;7456	1504;3576;6463;6694;7144;7736;7737;7738;7739	1504;3576;6463;6694;7144;7736	142		32
P62805	P62805	4	4	4	Histone H4	HIST1H4A	sp|P62805|H4_HUMAN Histone H4 OS=Homo sapiens OX=9606 GN=HIST1H4A PE=1 SV=2	1	4	4	4	38.8	38.8	38.8	11.367	103	103	0	4.7943	122250000	3				711	958;3901;8017;8236	True;True;True;True	981;3989;8240;8463	1282;5247;11001;11285	1321;5445;11471;11766	1321;5445;11471;11766
Q9H0U4;Q92928;P62820	Q9H0U4;Q92928;P62820	1;1;1	1;1;1	1;1;1	Ras-related protein Rab-1B;Putative Ras-related protein Rab-1C;Ras-related protein Rab-1A	RAB1B;RAB1C;RAB1A	sp|Q9H0U4|RAB1B_HUMAN Ras-related protein Rab-1B OS=Homo sapiens OX=9606 GN=RAB1B PE=1 SV=1;sp|Q92928|RAB1C_HUMAN Putative Ras-related protein Rab-1C OS=Homo sapiens OX=9606 GN=RAB1C PE=5 SV=2;sp|P62820|RAB1A_HUMAN Ras-related protein Rab-1A OS=Homo sapien	3	1	1	1	8	8	8	22.171	201	201;201;205	0	2.7559	0	1				712	1607	TRUE	1645	2153	2232	2232
P62826	P62826	3	3	3	GTP-binding nuclear protein Ran	RAN	sp|P62826|RAN_HUMAN GTP-binding nuclear protein Ran OS=Homo sapiens OX=9606 GN=RAN PE=1 SV=3	1	3	3	3	16.2	16.2	16.2	24.423	216	216	0	2.4301	45167000	2				713	3282;7147;8127	True;True;True	3357;7329;8350	4419;9776;11139	4595;10183;11613	4595;10183;11613
P62829	P62829	3	3	3	60S ribosomal protein L23	RPL23	sp|P62829|RL23_HUMAN 60S ribosomal protein L23 OS=Homo sapiens OX=9606 GN=RPL23 PE=1 SV=1	1	3	3	3	30.7	30.7	30.7	14.865	140	140	0	45.907	292560000	5				714	3912;5120;5987	True;True;True	4000;5229;5230;6122	5260;5261;6906;6907;8068	5458;5459;7171;7172;8377	5459;7171;8377	143;144		60;62
P62841	P62841	4	4	4	40S ribosomal protein S15	RPS15	sp|P62841|RS15_HUMAN 40S ribosomal protein S15 OS=Homo sapiens OX=9606 GN=RPS15 PE=1 SV=2	1	4	4	4	55.2	55.2	55.2	17.04	145	145	0	23.326	381340000	9				715	1232;1492;3081;7577	True;True;True;True	1260;1261;1529;3152;7778;7779	1631;1632;1973;1974;4148;10353;10354;10355;10356	1683;1684;2046;2047;4318;10792;10793;10794;10795	1684;2047;4318;10795	145;146		83;111
P62847	P62847	5	5	5	40S ribosomal protein S24	RPS24	sp|P62847|RS24_HUMAN 40S ribosomal protein S24 OS=Homo sapiens OX=9606 GN=RPS24 PE=1 SV=1	1	5	5	5	35.3	35.3	35.3	15.423	133	133	0	8.8672	280470000	5				716	4270;5689;6436;7931;7945	True;True;True;True;True	4362;5812;6582;8149;8164	5740;7665;8766;10857;10880	5949;7953;9127;11315;11338	5949;7953;9127;11315;11338
P62851	P62851	6	6	6	40S ribosomal protein S25	RPS25	sp|P62851|RS25_HUMAN 40S ribosomal protein S25 OS=Homo sapiens OX=9606 GN=RPS25 PE=1 SV=1	1	6	6	6	34.4	34.4	34.4	13.742	125	125	0	20.906	563140000	7				717	56;636;1139;2075;4825;5104	True;True;True;True;True;True	57;653;1163;2122;4927;5213	78;831;1506;1507;1508;2763;6494;6888	79;847;1552;1553;1554;2872;6740;7153	79;847;1552;2872;6740;7153
P62854;Q5JNZ5	P62854;Q5JNZ5	3;2	3;2	3;2	40S ribosomal protein S26;Putative 40S ribosomal protein S26-like 1	RPS26;RPS26P11	sp|P62854|RS26_HUMAN 40S ribosomal protein S26 OS=Homo sapiens OX=9606 GN=RPS26 PE=1 SV=3;sp|Q5JNZ5|RS26L_HUMAN Putative 40S ribosomal protein S26-like 1 OS=Homo sapiens OX=9606 GN=RPS26P11 PE=5 SV=1	2	3	3	3	31.3	31.3	31.3	13.015	115	115;115	0	31.434	129230000	3				718	1114;4767;5905	True;True;True	1137;4869;6039	1468;6427;7951	1513;6669;8251	1513;6669;8251
P62857	P62857	1	1	1	40S ribosomal protein S28	RPS28	sp|P62857|RS28_HUMAN 40S ribosomal protein S28 OS=Homo sapiens OX=9606 GN=RPS28 PE=1 SV=1	1	1	1	1	17.4	17.4	17.4	7.8409	69	69	0	2.5821	62209000	1				719	1639	TRUE	1677	2189	2269	2269
P62861	P62861	1	1	1	40S ribosomal protein S30	FAU	sp|P62861|RS30_HUMAN 40S ribosomal protein S30 OS=Homo sapiens OX=9606 GN=FAU PE=1 SV=1	1	1	1	1	16.9	16.9	16.9	6.6478	59	59	0	2.3719	13638000	1				720	2495	TRUE	2553	3318	3455	3455
P62888	P62888	5	5	5	60S ribosomal protein L30	RPL30	sp|P62888|RL30_HUMAN 60S ribosomal protein L30 OS=Homo sapiens OX=9606 GN=RPL30 PE=1 SV=2	1	5	5	5	56.5	56.5	56.5	12.784	115	115	0	36.04	435050000	8				721	4288;5211;5435;7630;8133	True;True;True;True;True	4380;5323;5549;7835;8356	5768;5769;7045;7327;10445;10446;10447;11146	5979;5980;7317;7603;10887;10888;10889;11620	5979;7317;7603;10889;11620
P62899	P62899	6	6	6	60S ribosomal protein L31	RPL31	sp|P62899|RL31_HUMAN 60S ribosomal protein L31 OS=Homo sapiens OX=9606 GN=RPL31 PE=1 SV=1	1	6	6	6	45.6	45.6	45.6	14.463	125	125	0	8.9266	170550000	6				722	1867;3611;5522;5814;5969;6754	True;True;True;True;True;True	1908;3691;5636;5947;6104;6916	2488;4875;7438;7439;7836;8044;9204	2584;5063;7720;7721;8129;8350;9575	2584;5063;7721;8129;8350;9575
P62906	P62906	11	11	11	60S ribosomal protein L10a	RPL10A	sp|P62906|RL10A_HUMAN 60S ribosomal protein L10a OS=Homo sapiens OX=9606 GN=RPL10A PE=1 SV=2	1	11	11	11	43.8	43.8	43.8	24.831	217	217	0	58.986	1349100000	17				723	272;763;764;1354;2385;2445;3728;4318;4339;6141;8423	True;True;True;True;True;True;True;True;True;True;True	282;781;782;1387;2441;2502;3812;4412;4433;6281;8654	360;1015;1016;1017;1794;3177;3178;3254;3255;5026;5812;5813;5851;5852;8302;11548;11549	370;1042;1043;1044;1854;3310;3311;3391;3392;5218;6025;6026;6064;6065;8631;12041;12042	370;1043;1044;1854;3310;3391;5218;6026;6065;8631;12041
P62910	P62910	2	2	2	60S ribosomal protein L32	RPL32	sp|P62910|RL32_HUMAN 60S ribosomal protein L32 OS=Homo sapiens OX=9606 GN=RPL32 PE=1 SV=2	1	2	2	2	11.1	11.1	11.1	15.86	135	135	0	5.1746	26553000	2				724	2983;2984	True;True	3053;3054	4019;4020	4182;4183	4182;4183
P62913	P62913	8	8	8	60S ribosomal protein L11	RPL11	sp|P62913|RL11_HUMAN 60S ribosomal protein L11 OS=Homo sapiens OX=9606 GN=RPL11 PE=1 SV=2	1	8	8	8	48.3	48.3	48.3	20.252	178	178	0	21.173	447550000	10				725	158;595;4187;4471;6008;6183;8443;9009	True;True;True;True;True;True;True;True	163;611;4278;4567;6145;6324;8674;9247	211;778;5625;6024;8101;8354;11572;11573;12282	214;793;5832;6247;8411;8412;8685;12066;12067;12786	214;793;5832;6247;8411;8685;12066;12786
P62917	P62917	9	9	9	60S ribosomal protein L8	RPL8	sp|P62917|RL8_HUMAN 60S ribosomal protein L8 OS=Homo sapiens OX=9606 GN=RPL8 PE=1 SV=2	1	9	9	9	37	37	37	28.024	257	257	0	52.77	371700000	12				726	620;666;667;818;3483;4069;6708;7541;8801	True;True;True;True;True;True;True;True;True	637;683;684;838;3563;4157;6867;7739;9035	811;868;869;870;1094;1095;4720;5457;9143;10299;10300;12009	826;827;889;890;891;1123;1124;4905;5663;9513;10736;10737;12507	826;890;891;1124;4905;5663;9513;10737;12507
P62937;P0DN26;A0A0B4J2A2;A0A075B767;A0A075B759;Q9Y536;F5H284	P62937	4;1;1;1;1;1;1	4;1;1;1;1;1;1	4;1;1;1;1;1;1	Peptidyl-prolyl cis-trans isomerase A;Peptidyl-prolyl cis-trans isomerase A, N-terminally processed	PPIA	sp|P62937|PPIA_HUMAN Peptidyl-prolyl cis-trans isomerase A OS=Homo sapiens OX=9606 GN=PPIA PE=1 SV=2	7	4	4	4	35.2	35.2	35.2	18.012	165	165;164;164;164;164;164;164	0	6.9405	67154000	3				727	1657;3660;6978;8565	True;True;True;True	1695;3740;7152;8799	2207;4934;9516;11724	2288;5125;9908;12219	2288;5125;9908;12219
P62979;P62987;P0CG47;P0CG48	P62979;P62987;P0CG47;P0CG48	6;3;3;3	6;3;3;3	6;3;3;3	Ubiquitin-40S ribosomal protein S27a;Ubiquitin;40S ribosomal protein S27a;Ubiquitin-60S ribosomal protein L40;Ubiquitin;60S ribosomal protein L40;Polyubiquitin-B;Ubiquitin;Polyubiquitin-C;Ubiquitin	RPS27A;UBA52;UBB;UBC	sp|P62979|RS27A_HUMAN Ubiquitin-40S ribosomal protein S27a OS=Homo sapiens OX=9606 GN=RPS27A PE=1 SV=2;sp|P62987|RL40_HUMAN Ubiquitin-60S ribosomal protein L40 OS=Homo sapiens OX=9606 GN=UBA52 PE=1 SV=2;sp|P0CG47|UBB_HUMAN Polyubiquitin-B OS=Homo sapiens O	4	6	6	6	41	41	41	17.965	156	156;128;229;685	0	36.815	1170500000	9				728	851;1521;1995;5710;6574;7677	True;True;True;True;True;True	872;1558;2039;5835;6724;7882	1138;1139;2011;2012;2658;2659;7697;8953;10516	1169;1170;2085;2086;2764;2765;7986;9319;10963	1170;2086;2765;7986;9319;10963
P62995	P62995	2	2	2	Transformer-2 protein homolog beta	TRA2B	sp|P62995|TRA2B_HUMAN Transformer-2 protein homolog beta OS=Homo sapiens OX=9606 GN=TRA2B PE=1 SV=1	1	2	2	2	10.4	10.4	10.4	33.665	288	288	0	8.2653	12032000	2				729	539;3885	True;True	553;3973	700;5226	715;5424	715;5424
P63010;Q10567	P63010	10;3	10;3	10;3	AP-2 complex subunit beta	AP2B1	sp|P63010|AP2B1_HUMAN AP-2 complex subunit beta OS=Homo sapiens OX=9606 GN=AP2B1 PE=1 SV=1	2	10	10	10	13.3	13.3	13.3	104.55	937	937;949	0	12.608	82673000	9				730	1107;1400;2304;2838;4184;4409;4437;4496;5285;7219	True;True;True;True;True;True;True;True;True;True	1130;1435;2357;2905;4275;4504;4533;4592;5398;7403	1460;1853;3063;3814;5621;5944;5982;6058;7139;7140;9863	1505;1919;3190;3969;5828;6163;6201;6283;7415;7416;10275	1505;1919;3190;3969;5828;6163;6201;6283;7416;10275
P63104	P63104	6	6	4	14-3-3 protein zeta/delta	YWHAZ	sp|P63104|1433Z_HUMAN 14-3-3 protein zeta/delta OS=Homo sapiens OX=9606 GN=YWHAZ PE=1 SV=1	1	6	6	4	32.2	32.2	24.9	27.745	245	245	0	77.475	163910000	7				731	1078;1336;2806;5953;7443;9122	True;True;True;True;True;True	1101;1368;2873;6088;7635;9361	1427;1770;3772;8018;10155;10156;12428	1472;1830;3927;8318;10583;10584;12939	1472;1830;3927;8318;10583;12939
P63151;Q66LE6;Q00005	P63151;Q66LE6	6;3;2	6;3;2	6;3;2	Serine/threonine-protein phosphatase 2A 55 kDa regulatory subunit B alpha isoform;Serine/threonine-protein phosphatase 2A 55 kDa regulatory subunit B delta isoform	PPP2R2A;PPP2R2D	sp|P63151|2ABA_HUMAN Serine/threonine-protein phosphatase 2A 55 kDa regulatory subunit B alpha isoform OS=Homo sapiens OX=9606 GN=PPP2R2A PE=1 SV=1;sp|Q66LE6|2ABD_HUMAN Serine/threonine-protein phosphatase 2A 55 kDa regulatory subunit B delta isoform OS=Ho	3	6	6	6	22.1	22.1	22.1	51.691	447	447;453;443	0	17.679	37064000	6				732	1117;2569;2640;3809;6861;8621	True;True;True;True;True;True	1140;2629;2700;3897;7027;8855	1471;3420;3510;5134;9342;11792	1516;3558;3650;5328;9718;12289	1516;3558;3650;5328;9718;12289
P63173	P63173	2	2	2	60S ribosomal protein L38	RPL38	sp|P63173|RL38_HUMAN 60S ribosomal protein L38 OS=Homo sapiens OX=9606 GN=RPL38 PE=1 SV=2	1	2	2	2	18.6	18.6	18.6	8.2178	70	70	0	2.1708	42292000	2				733	3505;4160	True;True	3585;4250	4742;5588	4927;5795	4927;5795
P63208	P63208	2	2	2	S-phase kinase-associated protein 1	SKP1	sp|P63208|SKP1_HUMAN S-phase kinase-associated protein 1 OS=Homo sapiens OX=9606 GN=SKP1 PE=1 SV=2	1	2	2	2	15.3	15.3	15.3	18.658	163	163	0	8.0904	28188000	2				734	5800;7492	True;True	5933;7685	7815;10224	8108;10656	8108;10656
P63241;Q9GZV4;Q6IS14	P63241;Q9GZV4;Q6IS14	3;2;2	3;2;2	3;2;2	Eukaryotic translation initiation factor 5A-1;Eukaryotic translation initiation factor 5A-2;Eukaryotic translation initiation factor 5A-1-like	EIF5A;EIF5A2;EIF5AL1	sp|P63241|IF5A1_HUMAN Eukaryotic translation initiation factor 5A-1 OS=Homo sapiens OX=9606 GN=EIF5A PE=1 SV=2;sp|Q9GZV4|IF5A2_HUMAN Eukaryotic translation initiation factor 5A-2 OS=Homo sapiens OX=9606 GN=EIF5A2 PE=1 SV=3;sp|Q6IS14|IF5AL_HUMAN Eukaryotic	3	3	3	3	34.4	34.4	34.4	16.832	154	154;153;154	0	21.504	43702000	4				735	4341;5799;8315	True;True;True	4435;5932;8544	5855;7814;11390;11391	6068;8107;11876;11877	6068;8107;11877
P63244	P63244	11	11	11	Guanine nucleotide-binding protein subunit beta-2-like 1;Guanine nucleotide-binding protein subunit beta-2-like 1, N-terminally processed	GNB2L1	sp|P63244|RACK1_HUMAN Receptor of activated protein C kinase 1 OS=Homo sapiens OX=9606 GN=RACK1 PE=1 SV=3	1	11	11	11	60.9	60.9	60.9	35.076	317	317	0	117.7	780380000	15				736	188;995;1384;2437;2765;3290;3678;5491;7803;9244;9261	True;True;True;True;True;True;True;True;True;True;True	194;1018;1419;2494;2832;3365;3760;5605;8012;9486;9503	247;1329;1835;3243;3711;4435;4436;4963;4964;7402;10682;10683;12569;12590	251;1370;1371;1900;3379;3865;4614;4615;5154;5155;7684;11139;11140;13084;13105	251;1371;1900;3379;3865;4614;5154;7684;11140;13084;13105
P63261	P63261	21	21	1	Actin, cytoplasmic 2;Actin, cytoplasmic 2, N-terminally processed	ACTG1	sp|P63261|ACTG_HUMAN Actin, cytoplasmic 2 OS=Homo sapiens OX=9606 GN=ACTG1 PE=1 SV=1	1	21	21	1	70.9	70.9	4.5	41.792	375	375	0	233.02	11598000000	56				737	263;772;859;893;1211;1221;1341;1342;1561;1725;1745;3155;3324;3623;4023;4085;4481;6309;7410;7934;8099	True;True;True;True;True;True;True;True;True;True;True;True;True;True;True;True;True;True;True;True;True	272;790;880;914;915;1237;1238;1248;1249;1373;1374;1598;1599;1763;1783;3226;3400;3401;3703;4111;4174;4577;6453;7602;8152;8153;8322	348;1026;1027;1147;1186;1187;1188;1189;1602;1603;1604;1615;1616;1617;1618;1776;1777;2063;2064;2065;2297;2323;4239;4490;4491;4492;4891;5401;5402;5403;5481;5482;6034;6035;6036;6037;8578;8579;10111;10112;10860;10861;10862;10863;10864;10865;10866;11105;11106	357;358;1053;1054;1178;1219;1220;1221;1222;1652;1653;1654;1655;1666;1667;1668;1669;1670;1836;1837;2137;2138;2139;2379;2380;2406;4411;4412;4669;4670;4671;5080;5606;5607;5608;5609;5687;5688;6257;6258;6259;6260;6261;8934;8935;10537;10538;10539;11318;11319;11320;11321;11322;11323;11324;11578;11579	357;1054;1178;1220;1652;1670;1836;1837;2138;2380;2406;4411;4671;5080;5608;5688;6258;8935;10537;11319;11578	135;136;137;138;139;147		16;44;153;190;283;305
P67809;Q9Y2T7	P67809	12;3	12;3	8;0	Nuclease-sensitive element-binding protein 1	YBX1	sp|P67809|YBOX1_HUMAN Nuclease-sensitive element-binding protein 1 OS=Homo sapiens OX=9606 GN=YBX1 PE=1 SV=3	2	12	12	8	63.6	63.6	53.4	35.924	324	324;364	0	121.37	2287100000	22				738	20;1533;1556;2539;5810;5811;6151;6152;6687;6688;7245;7372	True;True;True;True;True;True;True;True;True;True;True;True	20;1570;1593;2597;5943;5944;6291;6292;6845;6846;6847;7430;7564	21;2025;2057;2058;3380;7829;7830;7831;7832;8312;8313;9117;9118;9119;9120;9121;9899;9900;9901;10067;10068;10069	21;2099;2131;2132;3518;8122;8123;8124;8125;8642;8643;9485;9486;9487;9488;9489;9490;9491;10314;10315;10316;10491;10492;10493	21;2099;2132;3518;8123;8125;8642;8643;9488;9490;10315;10491	148		218
P67870	P67870	1	1	1	Casein kinase II subunit beta	CSNK2B	sp|P67870|CSK2B_HUMAN Casein kinase II subunit beta OS=Homo sapiens OX=9606 GN=CSNK2B PE=1 SV=1	1	1	1	1	7.9	7.9	7.9	24.942	215	215	0	4.1646	23229000	1				739	3612	TRUE	3692	4876	5064	5064
P68133;P68032;P63267;P62736	P68133;P68032;P63267;P62736	11;11;10;10	1;1;1;1	1;1;1;1	Actin, alpha skeletal muscle;Actin, alpha cardiac muscle 1;Actin, gamma-enteric smooth muscle;Actin, aortic smooth muscle	ACTA1;ACTC1;ACTG2;ACTA2	sp|P68133|ACTS_HUMAN Actin, alpha skeletal muscle OS=Homo sapiens OX=9606 GN=ACTA1 PE=1 SV=1;sp|P68032|ACTC_HUMAN Actin, alpha cardiac muscle 1 OS=Homo sapiens OX=9606 GN=ACTC1 PE=1 SV=1;sp|P63267|ACTH_HUMAN Actin, gamma-enteric smooth muscle OS=Homo sapie	4	11	1	1	30	4.2	4.2	42.051	377	377;377;376;377	0	16.262	1520200000	3				740	263;772;1211;1341;1342;1725;3324;3623;4023;7410;9184	False;False;False;False;False;False;False;False;False;False;True	272;790;1237;1238;1373;1374;1763;3400;3401;3703;4111;7602;9424;9425	348;1026;1027;1602;1603;1604;1776;1777;2297;4490;4491;4492;4891;5401;5402;5403;10111;10112;12498;12499;12500	357;358;1053;1054;1652;1653;1654;1655;1836;1837;2379;2380;4669;4670;4671;5080;5606;5607;5608;5609;10537;10538;10539;13010;13011;13012	357;1054;1652;1836;1837;2380;4671;5080;5608;10537;13011	136;138;149		46;84;192
P68104;Q5VTE0;Q05639	P68104;Q5VTE0	22;20;8	22;20;8	22;20;8	Elongation factor 1-alpha 1;Putative elongation factor 1-alpha-like 3	EEF1A1;EEF1A1P5	sp|P68104|EF1A1_HUMAN Elongation factor 1-alpha 1 OS=Homo sapiens OX=9606 GN=EEF1A1 PE=1 SV=1;sp|Q5VTE0|EF1A3_HUMAN Putative elongation factor 1-alpha-like 3 OS=Homo sapiens OX=9606 GN=EEF1A1P5 PE=5 SV=1	3	22	22	22	63.9	63.9	63.9	50.14	462	462;462;463	0	218.07	7864200000	52				741	1045;1046;1047;1672;2081;2927;3583;3606;4083;4164;5147;5560;5805;5994;6212;6404;6522;6887;7349;7634;8215;9277	True;True;True;True;True;True;True;True;True;True;True;True;True;True;True;True;True;True;True;True;True;True	1068;1069;1070;1710;2128;2997;3663;3686;4172;4254;5257;5675;5938;6129;6130;6354;6549;6670;7055;7056;7540;7839;8441;8442;9519	1388;1389;1390;1391;1392;2226;2227;2228;2769;3949;3950;3951;4840;4867;4868;5479;5592;6940;6941;7492;7821;7822;7823;8079;8080;8081;8082;8083;8084;8085;8392;8713;8888;9372;9373;9374;9375;10038;10453;10454;10455;10456;10457;11253;11254;11255;11256;11257;12655;12656	1433;1434;1435;1436;1437;2307;2308;2309;2878;4111;4112;4113;5025;5053;5054;5685;5799;7205;7206;7775;8114;8115;8116;8388;8389;8390;8391;8392;8393;8394;8395;8724;9070;9254;9750;9751;9752;9753;10461;10895;10896;10897;10898;10899;10900;11731;11732;11733;11734;11735;11736;13179;13180	1433;1434;1437;2307;2878;4113;5025;5054;5685;5799;7205;7775;8116;8391;8724;9070;9254;9752;10461;10895;11735;13180	150;151;152;153		102;276;404;410
P68363;A6NHL2;Q9H853	P68363	25;2;1	4;0;0	0;0;0	Tubulin alpha-1B chain	TUBA1B	sp|P68363|TBA1B_HUMAN Tubulin alpha-1B chain OS=Homo sapiens OX=9606 GN=TUBA1B PE=1 SV=1	3	25	4	0	78.9	18.4	0	50.151	451	451;446;241	0	130.5	912090000	6				742	244;245;760;775;838;1386;1518;1542;1544;1711;2159;2163;3610;4368;4822;5330;5331;5935;6396;6397;6661;6966;7660;8272;9164	False;False;True;False;True;False;False;False;True;False;False;False;False;False;False;False;False;False;False;False;False;True;False;False;False	252;253;254;778;793;858;1421;1555;1579;1581;1749;2209;2213;3690;4463;4924;5443;5444;6069;6541;6542;6816;7140;7865;8499;9403	320;321;322;323;324;1010;1011;1031;1032;1033;1117;1118;1837;2008;2038;2040;2041;2280;2281;2875;2876;2880;4873;4874;5894;6489;6490;6491;7195;7196;7996;7997;8700;8701;8702;8703;8704;9078;9503;10493;10494;10495;11329;11330;12472	327;328;329;330;331;1037;1038;1058;1059;1060;1061;1147;1148;1902;2081;2112;2114;2115;2362;2363;2996;2997;2998;3002;5059;5060;5061;5062;6110;6733;6734;6735;6736;6737;7471;7472;8296;8297;9057;9058;9059;9060;9061;9446;9895;10938;10939;10940;10941;11812;11813;11814;12983	328;331;1038;1061;1148;1902;2081;2112;2115;2363;2996;3002;5061;6110;6733;7471;7472;8296;9057;9061;9446;9895;10938;11813;12983	154;155		313;413
P68366	P68366	21	3	3	Tubulin alpha-4A chain	TUBA4A	sp|P68366|TBA4A_HUMAN Tubulin alpha-4A chain OS=Homo sapiens OX=9606 GN=TUBA4A PE=1 SV=1	1	21	3	3	57.1	10	10	49.924	448	448	0	15.391	110090000	4				743	244;245;760;774;838;1385;1542;2159;2163;3610;4822;5330;5331;5935;6396;6397;6661;6966;7661;8272;9164	False;False;False;True;False;True;False;False;False;False;False;False;False;False;False;False;False;False;True;False;False	252;253;254;778;792;858;1420;1579;2209;2213;3690;4924;5443;5444;6069;6541;6542;6816;7140;7866;8499;9403	320;321;322;323;324;1010;1011;1029;1030;1117;1118;1836;2038;2875;2876;2880;4873;4874;6489;6490;6491;7195;7196;7996;7997;8700;8701;8702;8703;8704;9078;9503;10496;11329;11330;12472	327;328;329;330;331;1037;1038;1056;1057;1147;1148;1901;2112;2996;2997;2998;3002;5059;5060;5061;5062;6733;6734;6735;6736;6737;7471;7472;8296;8297;9057;9058;9059;9060;9061;9446;9895;10942;11812;11813;11814;12983	328;331;1038;1057;1148;1901;2112;2996;3002;5061;6733;7471;7472;8296;9057;9061;9446;9895;10942;11813;12983	154;155		313;413
P68371	P68371	23	23	1	Tubulin beta-4B chain	TUBB4B	sp|P68371|TBB4B_HUMAN Tubulin beta-4B chain OS=Homo sapiens OX=9606 GN=TUBB4B PE=1 SV=1	1	23	23	1	74.4	74.4	2.7	49.83	445	445	0	323.31	7286900000	45				744	498;790;1729;2047;2376;2509;2773;3783;3813;3877;3897;4185;4459;4744;5405;5719;5724;5997;6079;6907;7470;8674;9156	True;True;True;True;True;True;True;True;True;True;True;True;True;True;True;True;True;True;True;True;True;True;True	511;808;1767;2093;2094;2431;2567;2840;3870;3871;3901;3965;3985;4276;4555;4845;4846;5518;5519;5844;5849;6133;6217;7077;7663;8909;9395	647;1050;2303;2304;2727;2728;3160;3161;3340;3341;3342;3343;3344;3345;3722;3723;5101;5102;5103;5141;5216;5217;5241;5622;5623;6012;6398;6399;6400;7286;7287;7288;7289;7708;7713;7714;8088;8208;8209;9400;9401;10192;10193;11856;11857;12464	660;1078;2386;2387;2836;2837;3291;3292;3478;3479;3480;3481;3482;3483;3876;3877;3878;5294;5295;5296;5335;5414;5415;5439;5829;5830;6234;6640;6641;6642;7562;7563;7564;7565;7997;8002;8003;8398;8532;8533;9779;9780;10621;10622;12354;12355;12975	660;1078;2386;2837;3292;3479;3878;5296;5335;5415;5439;5830;6234;6642;7564;7997;8002;8398;8532;9780;10621;12354;12975	64;65;66;75		164;233;267;330
P68400;Q8NEV1	P68400;Q8NEV1	3;2	3;2	3;2	Casein kinase II subunit alpha;Casein kinase II subunit alpha 3	CSNK2A1;CSNK2A3	sp|P68400|CSK21_HUMAN Casein kinase II subunit alpha OS=Homo sapiens OX=9606 GN=CSNK2A1 PE=1 SV=1;sp|Q8NEV1|CSK23_HUMAN Casein kinase II subunit alpha 3 OS=Homo sapiens OX=9606 GN=CSNK2A3 PE=1 SV=2	2	3	3	3	15.3	15.3	15.3	45.143	391	391;391	0	3.5996	41951000	3				745	2487;4779;8454	True;True;True	2545;4881;8685	3306;6440;11586	3443;6684;12080	3443;6684;12080
Q6NXT2;Q71DI3;Q16695;P84243;P68431	Q6NXT2;Q71DI3;Q16695;P84243;P68431	1;1;1;1;1	1;1;1;1;1	1;1;1;1;1	Histone H3.3C;Histone H3.2;Histone H3.1t;Histone H3.3;Histone H3.1	H3F3C;HIST2H3A;HIST3H3;H3F3A;HIST1H3A	sp|Q6NXT2|H3C_HUMAN Histone H3.3C OS=Homo sapiens OX=9606 GN=H3F3C PE=1 SV=3;sp|Q71DI3|H32_HUMAN Histone H3.2 OS=Homo sapiens OX=9606 GN=HIST2H3A PE=1 SV=3;sp|Q16695|H31T_HUMAN Histone H3.1t OS=Homo sapiens OX=9606 GN=HIST3H3 PE=1 SV=3;sp|P84243|H33_HUMAN	5	1	1	1	5.2	5.2	5.2	15.214	135	135;136;136;136;136	0.0015456	1.1846	6578500	1				746	7312	TRUE	7503	9993	10413	10413
P69905	P69905	2	2	2	Hemoglobin subunit alpha	HBA1	sp|P69905|HBA_HUMAN Hemoglobin subunit alpha OS=Homo sapiens OX=9606 GN=HBA1 PE=1 SV=2	1	2	2	2	19	19	19	15.257	142	142	0	4.5383	42005000	2				747	2289;8258	True;True	2341;8485	3045;11313	3171;11796	3171;11796
P78332	P78332	1	1	1	RNA-binding protein 6	RBM6	sp|P78332|RBM6_HUMAN RNA-binding protein 6 OS=Homo sapiens OX=9606 GN=RBM6 PE=1 SV=5	1	1	1	1	1.6	1.6	1.6	128.64	1123	1123	0	2.1636	4921300	1				748	5284	TRUE	5397	7138	7414	7414
P78344	P78344	15	15	15	Eukaryotic translation initiation factor 4 gamma 2	EIF4G2	sp|P78344|IF4G2_HUMAN Eukaryotic translation initiation factor 4 gamma 2 OS=Homo sapiens OX=9606 GN=EIF4G2 PE=1 SV=1	1	15	15	15	24.6	24.6	24.6	102.36	907	907	0	47.886	281550000	18				749	694;1175;1231;2086;2885;4146;4370;4499;4579;5218;6296;6408;6790;7203;7871	True;True;True;True;True;True;True;True;True;True;True;True;True;True;True	711;1201;1259;2133;2953;4236;4465;4595;4678;5330;6440;6553;6952;7387;8084	916;1557;1630;2775;3888;5571;5896;6062;6180;7054;7055;8560;8717;8718;9248;9844;9845;10777	941;1606;1682;2884;4049;5778;6112;6287;6412;7326;7327;8916;9074;9075;9620;10256;10257;11235	941;1606;1682;2884;4049;5778;6112;6287;6412;7326;8916;9075;9620;10257;11235
P78346	P78346	1	1	1	Ribonuclease P protein subunit p30	RPP30	sp|P78346|RPP30_HUMAN Ribonuclease P protein subunit p30 OS=Homo sapiens OX=9606 GN=RPP30 PE=1 SV=1	1	1	1	1	3.7	3.7	3.7	29.321	268	268	0.0081577	0.51642	1741700	1				750	5496	TRUE	5610	7407	7689	7689
P78347	P78347	3	3	3	General transcription factor II-I	GTF2I	sp|P78347|GTF2I_HUMAN General transcription factor II-I OS=Homo sapiens OX=9606 GN=GTF2I PE=1 SV=2	1	3	3	3	6.2	6.2	6.2	112.42	998	998	0	7.104	23867000	3				751	1288;2972;6671	True;True;True	1319;3042;6827	1706;4007;9095	1765;4169;9463	1765;4169;9463
P78371	P78371	11	11	11	T-complex protein 1 subunit beta	CCT2	sp|P78371|TCPB_HUMAN T-complex protein 1 subunit beta OS=Homo sapiens OX=9606 GN=CCT2 PE=1 SV=4	1	11	11	11	32.9	32.9	32.9	57.488	535	535	0	53.648	142960000	10				752	684;1482;1667;2566;4165;4401;4456;4684;5399;5675;8031	True;True;True;True;True;True;True;True;True;True;True	701;1519;1705;2626;4255;4496;4552;4785;5512;5798;8254	905;1959;2219;3417;5593;5933;5934;6009;6331;7277;7649;11022	930;2031;2300;3555;5800;6151;6152;6231;6568;7553;7937;11493	930;2031;2300;3555;5800;6152;6231;6568;7553;7937;11493
P78381	P78381	1	1	1	UDP-galactose translocator	SLC35A2	sp|P78381|S35A2_HUMAN UDP-galactose translocator OS=Homo sapiens OX=9606 GN=SLC35A2 PE=1 SV=1	1	1	1	1	7.8	7.8	7.8	41.307	396	396	0.0081688	0.52274	14613000	1				753	333	TRUE	344	435	445	445
P78406	P78406	2	2	2	mRNA export factor	RAE1	sp|P78406|RAE1L_HUMAN mRNA export factor OS=Homo sapiens OX=9606 GN=RAE1 PE=1 SV=1	1	2	2	2	9	9	9	40.968	368	368	0	4.3696	9164600	2				754	5766;8083	True;True	5899;8306	7775;11088	8068;11561	8068;11561
P78527	P78527	34	34	34	DNA-dependent protein kinase catalytic subunit	PRKDC	sp|P78527|PRKDC_HUMAN DNA-dependent protein kinase catalytic subunit OS=Homo sapiens OX=9606 GN=PRKDC PE=1 SV=3	1	34	34	34	11.8	11.8	11.8	469.08	4128	4128	0	104.61	418940000	35				755	57;275;596;1100;1939;2009;2686;2848;2888;3352;3622;3714;3773;3814;4097;4364;4657;4710;4910;4980;5027;5229;5536;5554;5738;5976;6314;6375;7202;7248;7980;8235;8781;9182	True;True;True;True;True;True;True;True;True;True;True;True;True;True;True;True;True;True;True;True;True;True;True;True;True;True;True;True;True;True;True;True;True;True	58;285;612;1123;1981;2053;2747;2916;2956;3429;3702;3798;3859;3902;4187;4458;4758;4811;5016;5087;5136;5341;5651;5669;5865;6111;6458;6520;7386;7433;8200;8462;9015;9422	79;363;364;365;779;1453;2580;2675;3571;3827;3891;4532;4890;5011;5087;5142;5501;5889;6292;6359;6653;6744;6799;7066;7067;7459;7485;7733;8057;8585;8674;9843;9904;10935;11284;11984;12496	80;373;374;375;794;1498;2686;2781;3714;3982;4052;4711;5079;5203;5280;5336;5708;6105;6527;6598;6914;7006;7061;7338;7339;7742;7768;8025;8366;8941;9031;10255;10319;11399;11765;12482;13008	80;374;794;1498;2686;2781;3714;3982;4052;4711;5079;5203;5280;5336;5708;6105;6527;6598;6914;7006;7061;7338;7742;7768;8025;8366;8941;9031;10255;10319;11399;11765;12482;13008
P79522	P79522	1	1	1	Proline-rich protein 3	PRR3	sp|P79522|PRR3_HUMAN Proline-rich protein 3 OS=Homo sapiens OX=9606 GN=PRR3 PE=1 SV=2	1	1	1	1	9	9	9	20.64	188	188	0.0049575	0.65878	3023200	2				756	2948	TRUE	3018	3978;3979	4140;4141	4140
P81605	P81605	1	1	1	Dermcidin;Survival-promoting peptide;DCD-1	DCD	sp|P81605|DCD_HUMAN Dermcidin OS=Homo sapiens OX=9606 GN=DCD PE=1 SV=2	1	1	1	1	10	10	10	11.284	110	110	0	2.8621	38543000	2				757	956	TRUE	979	1279;1280	1317;1318	1317
P82094	P82094	4	4	4	TATA element modulatory factor	TMF1	sp|P82094|TMF1_HUMAN TATA element modulatory factor OS=Homo sapiens OX=9606 GN=TMF1 PE=1 SV=2	1	4	4	4	6.3	6.3	6.3	122.84	1093	1093	0	5.5762	26728000	4				758	156;447;3132;8069	True;True;True;True	160;460;3203;8292	208;589;4207;11068	211;602;4379;11540	211;602;4379;11540
P82650	P82650	1	1	1	28S ribosomal protein S22, mitochondrial	MRPS22	sp|P82650|RT22_HUMAN 28S ribosomal protein S22, mitochondrial OS=Homo sapiens OX=9606 GN=MRPS22 PE=1 SV=1	1	1	1	1	7.5	7.5	7.5	41.28	360	360	0.0015361	1.1529	5499700	1				759	1176	TRUE	1202	1558	1607	1607
P83111	P83111	1	1	1	Serine beta-lactamase-like protein LACTB, mitochondrial	LACTB	sp|P83111|LACTB_HUMAN Serine beta-lactamase-like protein LACTB, mitochondrial OS=Homo sapiens OX=9606 GN=LACTB PE=1 SV=2	1	1	1	1	2.7	2.7	2.7	60.693	547	547	0.0082474	0.5647	0	1				760	8882	TRUE	9117	12110	12610	12610
P83731	P83731	5	5	5	60S ribosomal protein L24	RPL24	sp|P83731|RL24_HUMAN 60S ribosomal protein L24 OS=Homo sapiens OX=9606 GN=RPL24 PE=1 SV=1	1	5	5	5	31.8	31.8	31.8	17.779	157	157	0	14.167	578620000	5				761	367;865;5654;6366;8243	True;True;True;True;True	380;886;5776;6511;8470	487;1154;7622;7623;8659;11294	498;1185;7908;7909;9016;11776	498;1185;7908;9016;11776
P84090	P84090	3	3	3	Enhancer of rudimentary homolog	ERH	sp|P84090|ERH_HUMAN Enhancer of rudimentary homolog OS=Homo sapiens OX=9606 GN=ERH PE=1 SV=1	1	3	3	3	32.7	32.7	32.7	12.259	104	104	0	43.064	44613000	3				762	4051;6932;8035	True;True;True	4139;7105;8258	5436;9456;11026	5642;9845;11497	5642;9845;11497
P84095	P84095	1	1	1	Rho-related GTP-binding protein RhoG	RHOG	sp|P84095|RHOG_HUMAN Rho-related GTP-binding protein RhoG OS=Homo sapiens OX=9606 GN=RHOG PE=1 SV=1	1	1	1	1	9.9	9.9	9.9	21.308	191	191	0	2.8398	3767200	1				763	2095	TRUE	2143	2787	2897	2897
P84098	P84098	2	2	2	60S ribosomal protein L19	RPL19	sp|P84098|RL19_HUMAN 60S ribosomal protein L19 OS=Homo sapiens OX=9606 GN=RPL19 PE=1 SV=1	1	2	2	2	13.3	13.3	13.3	23.466	196	196	0	17.688	119310000	3				764	3293;8862	True;True	3368;9097	4440;12084;12085	4619;12584;12585	4619;12584
P84103	P84103	2	2	2	Serine/arginine-rich splicing factor 3	SRSF3	sp|P84103|SRSF3_HUMAN Serine/arginine-rich splicing factor 3 OS=Homo sapiens OX=9606 GN=SRSF3 PE=1 SV=1	1	2	2	2	18.3	18.3	18.3	19.329	164	164	0	3.1284	51309000	2				765	224;6028	True;True	232;6165	295;8124	300;8435	300;8435
P98160	P98160	1	1	1	Basement membrane-specific heparan sulfate proteoglycan core protein;Endorepellin;LG3 peptide	HSPG2	sp|P98160|PGBM_HUMAN Basement membrane-specific heparan sulfate proteoglycan core protein OS=Homo sapiens OX=9606 GN=HSPG2 PE=1 SV=4	1	1	1	1	0.4	0.4	0.4	468.83	4391	4391	0.0081633	0.52174	0	0				766	6746	TRUE	6908	9196	9566;9567	9567		21		4017
P98175	P98175	1	1	1	RNA-binding protein 10	RBM10	sp|P98175|RBM10_HUMAN RNA-binding protein 10 OS=Homo sapiens OX=9606 GN=RBM10 PE=1 SV=3	1	1	1	1	1.5	1.5	1.5	103.53	930	930	0	1.7456	0	1				767	1964	TRUE	2007	2620	2726	2726
P98179	P98179	1	1	1	RNA-binding protein 3	RBM3	sp|P98179|RBM3_HUMAN RNA-binding protein 3 OS=Homo sapiens OX=9606 GN=RBM3 PE=1 SV=1	1	1	1	1	11.5	11.5	11.5	17.17	157	157	0	4.0338	13124000	2				768	2664	TRUE	2725	3542;3543	3683;3684	3684
Q00325	Q00325	10	10	10	Phosphate carrier protein, mitochondrial	SLC25A3	sp|Q00325|MPCP_HUMAN Phosphate carrier protein, mitochondrial OS=Homo sapiens OX=9606 GN=SLC25A3 PE=1 SV=2	1	10	10	10	27.3	27.3	27.3	40.094	362	362	0	21.547	397730000	12				769	2108;2217;2782;3079;3119;3870;5161;5162;7972;8528	True;True;True;True;True;True;True;True;True;True	2157;2267;2849;3150;3190;3958;5271;5272;8192;8760	2806;2955;3734;4145;4190;5204;6960;6961;6962;10925;11679;11680	2916;3079;3889;4314;4360;5400;7229;7230;7231;11389;12174;12175	2916;3079;3889;4314;4360;5400;7229;7231;11389;12174
Q00341	Q00341	36	36	36	Vigilin	HDLBP	sp|Q00341|VIGLN_HUMAN Vigilin OS=Homo sapiens OX=9606 GN=HDLBP PE=1 SV=2	1	36	36	36	40.5	40.5	40.5	141.45	1268	1268	0	322.83	1976400000	48				770	226;542;552;646;700;1022;1131;1279;1477;1692;1780;1810;2373;3193;3485;3515;3849;3856;3959;4549;4717;5336;5563;5748;6565;6877;6962;7302;7538;7539;7592;7955;7956;8107;8311;8340	True;True;True;True;True;True;True;True;True;True;True;True;True;True;True;True;True;True;True;True;True;True;True;True;True;True;True;True;True;True;True;True;True;True;True;True	234;556;566;663;717;1045;1154;1310;1514;1730;1819;1849;2428;3265;3565;3595;3937;3944;4047;4646;4818;5449;5678;5879;6715;7044;7135;7493;7736;7737;7794;8175;8176;8330;8540;8569	297;703;704;714;715;846;922;1362;1489;1490;1695;1953;1954;2258;2374;2409;3155;3156;4294;4722;4755;5181;5189;5320;5321;6135;6366;7202;7203;7495;7496;7752;8942;9360;9495;9981;10295;10296;10382;10383;10907;10908;11116;11382;11383;11425;11426	302;718;719;729;730;867;947;1407;1534;1535;1752;2025;2026;2339;2340;2458;2496;3286;3287;4468;4907;4940;5377;5385;5524;5525;6365;6605;7478;7479;7778;7779;8044;8045;9308;9738;9886;10401;10732;10733;10823;10824;11370;11371;11372;11589;11867;11868;11911;11912	302;718;729;867;947;1407;1535;1752;2026;2340;2458;2496;3287;4468;4907;4940;5377;5385;5524;6365;6605;7478;7779;8045;9308;9738;9886;10401;10732;10733;10824;11370;11372;11589;11867;11912
Q00577	Q00577	3	3	3	Transcriptional activator protein Pur-alpha	PURA	sp|Q00577|PURA_HUMAN Transcriptional activator protein Pur-alpha OS=Homo sapiens OX=9606 GN=PURA PE=1 SV=2	1	3	3	3	33.9	33.9	33.9	34.91	322	322	0	38.475	58347000	4				771	1315;2941;4775	True;True;True	1346;3011;4877	1741;3970;6435	1800;4132;6678;6679	1800;4132;6679
Q00610	Q00610	83	83	65	Clathrin heavy chain 1	CLTC	sp|Q00610|CLH1_HUMAN Clathrin heavy chain 1 OS=Homo sapiens OX=9606 GN=CLTC PE=1 SV=5	1	83	83	65	60.1	60.1	50.3	191.61	1675	1675	0	323.31	11119000000	124				772	104;234;316;321;326;408;409;519;613;767;792;891;946;1259;1344;1345;1469;1536;1679;1890;1981;2001;2158;2172;2391;2408;2974;2979;2980;3181;3297;3351;3411;3609;3900;3998;4003;4037;4071;4088;4114;4123;4314;4328;4374;4440;4532;4556;4750;4926;4979;5061;5173;5354;5580;5718;5949;5967;6009;6015;6416;6571;6596;6625;6678;6682;7361;7385;7766;7896;8095;8156;8267;8299;8365;8706;8803;8804;8918;8919;9030;9079;90…	True;True;True;True;True;True;True;True;True;True;True;True;True;True;True;True;True;True;True;True;True;True;True;True;True;True;True;True;True;True;True;True;True;True;True;True;True;True;True;True;True;True;True;True;True;True;True;True;True;True;True;True;True;True;True;True;True;True;True;True;True;True;True;True;True;True;True;True;True;True;True;True;True;True;True;True;True;True;True;True…	105;242;327;332;337;421;422;533;629;785;810;912;969;1290;1376;1377;1506;1573;1717;1931;2024;2045;2208;2222;2447;2464;3044;3049;3050;3252;3372;3428;3491;3689;3988;4086;4091;4125;4159;4177;4204;4213;4408;4422;4469;4536;4629;4653;4852;5033;5086;5170;5283;5467;5695;5843;6084;6102;6146;6152;6561;6721;6747;6777;6835;6839;7552;7577;7975;8111;8318;8381;8494;8528;8594;8941;9037;9038;9154;9155;9268;9318;93…	132;306;307;308;413;420;421;427;540;541;542;675;803;1020;1021;1053;1184;1266;1671;1779;1780;1781;1944;2029;2030;2240;2241;2514;2641;2665;2666;2874;2892;3184;3185;3205;4010;4015;4016;4274;4445;4446;4530;4531;4631;4871;4872;5245;5246;5372;5373;5378;5421;5459;5460;5486;5487;5521;5522;5535;5536;5806;5807;5833;5834;5835;5900;5901;5985;5986;5987;5988;6106;6142;6406;6407;6677;6742;6743;6838;6839;6974;69…	135;312;313;314;315;423;430;431;437;553;554;555;690;818;1047;1048;1081;1217;1304;1728;1839;1840;1841;2016;2103;2104;2321;2322;2610;2747;2771;2772;2995;3015;3317;3318;3339;3340;4172;4178;4179;4448;4624;4625;4709;4710;4812;5057;5058;5443;5444;5576;5577;5583;5627;5665;5666;5692;5693;5728;5729;5742;5743;6017;6018;6046;6047;6048;6117;6118;6204;6205;6206;6207;6332;6372;6648;6649;6938;7004;7005;7100;710…	135;314;423;431;437;553;555;690;818;1048;1081;1217;1304;1728;1840;1841;2016;2104;2321;2610;2747;2771;2995;3015;3318;3339;4172;4178;4179;4448;4624;4709;4812;5057;5444;5577;5583;5627;5666;5692;5729;5743;6018;6048;6117;6207;6332;6372;6649;6938;7005;7100;7243;7502;7800;7995;8313;8347;8413;8420;9087;9316;9349;9393;9473;9477;10477;10507;11091;11266;11574;11655;11805;11852;11947;12396;12509;12511;12657;…
Q00839	Q00839	32	32	31	Heterogeneous nuclear ribonucleoprotein U	HNRNPU	sp|Q00839|HNRPU_HUMAN Heterogeneous nuclear ribonucleoprotein U OS=Homo sapiens OX=9606 GN=HNRNPU PE=1 SV=6	1	32	32	31	42.5	42.5	41.8	90.583	825	825	0	323.31	4826200000	48				773	384;821;964;1083;1753;2156;2915;2916;3139;3140;4078;4228;4931;4932;4933;5176;5177;5260;5541;5686;5837;6055;6056;6202;6659;7181;7258;7480;8129;8677;8678;9175	True;True;True;True;True;True;True;True;True;True;True;True;True;True;True;True;True;True;True;True;True;True;True;True;True;True;True;True;True;True;True;True	397;841;987;1106;1792;2206;2985;2986;3210;3211;4166;4167;4319;5038;5039;5040;5286;5287;5288;5372;5373;5656;5809;5970;6192;6193;6343;6814;7364;7444;7673;8352;8912;8913;9415	509;510;1098;1289;1433;2341;2342;2871;2872;3935;3936;3937;4214;4215;4216;4217;5468;5469;5470;5677;6683;6684;6685;6978;6979;6980;6981;7106;7107;7467;7662;7862;7863;8158;8159;8160;8376;8377;8378;9075;9814;9815;9920;9921;10208;11142;11860;11861;11862;11863;12487	520;521;522;1128;1328;1478;2424;2425;2426;2991;2992;4096;4097;4098;4099;4386;4387;4388;4389;5674;5675;5676;5884;6944;6945;6946;7247;7248;7249;7250;7378;7379;7750;7950;8155;8156;8474;8475;8476;8708;8709;8710;9443;10225;10226;10337;10338;10639;11616;12358;12359;12360;12361;12999	522;1128;1328;1478;2424;2992;4097;4099;4386;4388;5676;5884;6944;6945;6946;7247;7249;7379;7750;7950;8155;8474;8476;8710;9443;10226;10338;10639;11616;12359;12361;12999	156;157;158;159	22	53;313;501;534	271
Q01082	Q01082	26	26	25	Spectrin beta chain, non-erythrocytic 1	SPTBN1	sp|Q01082|SPTB2_HUMAN Spectrin beta chain, non-erythrocytic 1 OS=Homo sapiens OX=9606 GN=SPTBN1 PE=1 SV=2	1	26	26	25	16.8	16.8	16.4	274.61	2364	2364	0	89.305	242330000	23				774	953;1159;1215;1361;1454;1509;1640;1658;1698;1947;2124;2134;2326;3246;3265;3370;4016;4896;4940;5182;5476;5634;5697;7218;8631;8675	True;True;True;True;True;True;True;True;True;True;True;True;True;True;True;True;True;True;True;True;True;True;True;True;True;True	976;1183;1242;1394;1491;1546;1678;1696;1736;1990;2173;2184;2379;3320;3339;3448;4104;5001;5047;5293;5590;5756;5821;7402;8865;8910	1275;1532;1608;1801;1926;1992;2190;2208;2265;2594;2826;2827;2843;3091;4370;4398;4559;5392;6612;6693;6990;7381;7600;7680;9862;11804;11858	1313;1578;1659;1861;1997;2065;2270;2289;2347;2700;2941;2942;2961;3218;4546;4574;4739;5597;6869;6954;7260;7660;7886;7969;10274;12301;12356	1313;1578;1659;1861;1997;2065;2270;2289;2347;2700;2941;2961;3218;4546;4574;4739;5597;6869;6954;7260;7660;7886;7969;10274;12301;12356
Q01130	Q01130	1	1	1	Serine/arginine-rich splicing factor 2	SRSF2	sp|Q01130|SRSF2_HUMAN Serine/arginine-rich splicing factor 2 OS=Homo sapiens OX=9606 GN=SRSF2 PE=1 SV=4	1	1	1	1	7.7	7.7	7.7	25.476	221	221	0	1.8944	7367600	0				775	920	TRUE	943	1228	1263	1263
Q01650;Q9UM01;Q92536	Q01650	4;1;1	4;1;1	4;1;1	Large neutral amino acids transporter small subunit 1	SLC7A5	sp|Q01650|LAT1_HUMAN Large neutral amino acids transporter small subunit 1 OS=Homo sapiens OX=9606 GN=SLC7A5 PE=1 SV=2	3	4	4	4	10.8	10.8	10.8	55.01	507	507;511;515	0	5.6736	47121000	3				776	389;2609;4603;6740	True;True;True;True	402;2669;4702;6902	516;3471;6207;9189	528;3610;6440;9559	528;3610;6440;9559
Q01804	Q01804	21	21	21	OTU domain-containing protein 4	OTUD4	sp|Q01804|OTUD4_HUMAN OTU domain-containing protein 4 OS=Homo sapiens OX=9606 GN=OTUD4 PE=1 SV=4	1	21	21	21	29.5	29.5	29.5	124.04	1114	1114	0	115.99	380010000	22				777	323;753;966;989;1437;1525;1599;1905;1953;1961;1982;1990;2321;2322;2628;2629;5564;6441;6673;7428;7429	True;True;True;True;True;True;True;True;True;True;True;True;True;True;True;True;True;True;True;True;True	334;771;989;1012;1474;1562;1637;1947;1996;2004;2025;2034;2374;2375;2688;2689;5679;6587;6829;6830;7620;7621	423;1002;1003;1291;1323;1905;2017;2144;2535;2603;2617;2642;2652;3085;3086;3087;3496;3497;7497;8772;9097;9098;10133;10134	433;1029;1030;1330;1364;1975;2091;2222;2633;2709;2723;2748;2758;3212;3213;3214;3636;3637;7780;9134;9465;9466;10560;10561	433;1029;1330;1364;1975;2091;2222;2633;2709;2723;2748;2758;3213;3214;3636;3637;7780;9134;9465;10560;10561		23		546
Q01813	Q01813	4	4	2	ATP-dependent 6-phosphofructokinase, platelet type	PFKP	sp|Q01813|PFKAP_HUMAN ATP-dependent 6-phosphofructokinase, platelet type OS=Homo sapiens OX=9606 GN=PFKP PE=1 SV=2	1	4	4	2	5.6	5.6	3.4	85.595	784	784	0	4.8972	25921000	5				778	3637;5613;7583;9130	True;True;True;True	3717;5731;7785;9369	4907;7565;10365;12436	5096;5097;7850;10804;12947	5096;7850;10804;12947
Q01844	Q01844	10	10	10	RNA-binding protein EWS	EWSR1	sp|Q01844|EWS_HUMAN RNA-binding protein EWS OS=Homo sapiens OX=9606 GN=EWSR1 PE=1 SV=1	1	10	10	10	24.1	24.1	24.1	68.477	656	656	0	210.2	16368000000	38				779	80;81;258;2589;2716;2736;6279;6711;7617;7618	True;True;True;True;True;True;True;True;True;True	81;82;267;2649;2777;2778;2802;6422;6423;6871;7819;7820;7821;7822	105;106;107;340;341;3445;3608;3609;3610;3667;8530;8531;8532;8533;8534;8535;8536;8537;8538;8539;9150;9151;9152;10409;10410;10411;10412;10413;10414;10415;10416;10417;10418;10419;10420;10421;10422	106;107;108;109;347;348;349;3583;3752;3753;3754;3819;8885;8886;8887;8888;8889;8890;8891;8892;8893;8894;8895;9520;9521;9522;10850;10851;10852;10853;10854;10855;10856;10857;10858;10859;10860;10861;10862;10863	106;108;349;3583;3752;3819;8889;9520;10853;10861	160;161;162		275;340;397
Q01970	Q01970	6	6	6	1-phosphatidylinositol 4,5-bisphosphate phosphodiesterase beta-3	PLCB3	sp|Q01970|PLCB3_HUMAN 1-phosphatidylinositol 4,5-bisphosphate phosphodiesterase beta-3 OS=Homo sapiens OX=9606 GN=PLCB3 PE=1 SV=2	1	6	6	6	7	7	7	138.8	1234	1234	0	38.741	45258000	5				780	976;1381;1500;5419;6845;8821	True;True;True;True;True;True	999;1416;1537;5533;7011;9055	1303;1832;1983;7306;9323;12031	1342;1897;2056;7582;9698;12529	1342;1897;2056;7582;9698;12529
Q02413	Q02413	2	2	2	Desmoglein-1	DSG1	sp|Q02413|DSG1_HUMAN Desmoglein-1 OS=Homo sapiens OX=9606 GN=DSG1 PE=1 SV=2	1	2	2	2	3.3	3.3	3.3	113.75	1049	1049	0	4.4579	72512000	2				781	464;8263	True;True	477;8490	608;11318	621;11801	621;11801	163		133
Q02543	Q02543	8	8	8	60S ribosomal protein L18a	RPL18A	sp|Q02543|RL18A_HUMAN 60S ribosomal protein L18a OS=Homo sapiens OX=9606 GN=RPL18A PE=1 SV=2	1	8	8	8	35.8	35.8	35.8	20.762	176	176	0	44.13	560540000	8				782	1216;2511;2512;3545;4292;5835;7252;8183	True;True;True;True;True;True;True;True	1243;2569;2570;3625;4385;5968;7437;8408	1609;3347;3348;4789;4790;5778;7860;9908;11212	1660;3485;3486;4974;4975;5989;8153;10323;11690	1660;3485;3486;4974;5989;8153;10323;11690
Q02878	Q02878	8	8	8	60S ribosomal protein L6	RPL6	sp|Q02878|RL6_HUMAN 60S ribosomal protein L6 OS=Homo sapiens OX=9606 GN=RPL6 PE=1 SV=3	1	8	8	8	33.3	33.3	33.3	32.728	288	288	0	19.883	181640000	9				783	360;672;1757;3281;3321;6387;7369;8420	True;True;True;True;True;True;True;True	373;689;1796;3356;3397;6532;7561;8651	478;877;2347;4418;4486;4487;8688;8689;10063;11545	489;898;2431;4594;4665;4666;9045;9046;10487;12038	489;898;2431;4594;4665;9046;10487;12038
[truncated: 726 more rows]
