# Supplementary material
Source: Research Square preprint supplement (doi:10.21203/rs.3.rs-5240487/v1)
Supplement: Supplementary file 2 [file bb5ce169d50f6ff80b335a90.docx]

| Characteristics | Total(N) | Univariate analysis | | |  | Multivariate analysis | |
| --- | --- | --- | --- | --- | --- | --- | --- |
| Hazard ratio (95% CI) | P value | | Hazard ratio (95%CI) | P value |
| Pathologic T stage | 640 |  | | **< 0.001** |  |  |  |
| T1&T2 | 131 | Reference | |  |  | Reference |  |
| T3 | 435 | 2.047 (1.090 - 3.842) | | **0.026** |  | 1.742 (0.779 - 3.893) | 0.176 |
| T4 | 74 | 6.148 (3.045 - 12.415) | | **< 0.001** |  | 3.891 (1.584 - 9.558) | **0.003** |
| Pathologic N stage | 639 |  | | **< 0.001** |  |  |  |
| N0 | 367 | Reference | |  |  | Reference |  |
| N1 | 153 | 1.774 (1.131 - 2.781) | | **0.013** |  | 0.383 (0.140 - 1.051) | 0.062 |
| N2 | 119 | 3.873 (2.588 - 5.796) | | **< 0.001** |  | 0.745 (0.285 - 1.948) | 0.549 |
| Pathologic M stage | 563 |  | | **< 0.001** |  |  |  |
| M0 | 474 | Reference | |  |  | Reference |  |
| M1 | 89 | 3.989 (2.684 - 5.929) | | **< 0.001** |  | 1.882 (1.138 - 3.112) | **0.014** |
| Pathologic stage | 622 |  | | **< 0.001** |  |  |  |
| Stage I&Stage II | 348 | Reference | |  |  | Reference |  |
| Stage III&Stage IV | 274 | 2.988 (2.042 - 4.372) | | **< 0.001** |  | 3.769 (1.298 - 10.945) | **0.015** |
| HSPB1 | 643 |  | | **0.005** |  |  |  |
| Low | 321 | Reference | |  |  | Reference |  |
| High | 322 | 1.638 (1.152 - 2.327) | | **0.006** |  | 1.477 (1.002 - 2.179) | **0.049** |
