# Supplementary material
Source: Research Square preprint supplement (doi:10.21203/rs.3.rs-5240487/v1)
Supplement: Supplementary file 3 [file cab5916ec233edac27f1c3c7.docx]

| Characteristic | Low expression of HSPB1 | High expression of HSPB1 | p |
| --- | --- | --- | --- |
| n | 322 | 322 |  |
| T stage, n (%) |  |  | **0.023*** |
| T1 | 14 (2.2%) | 6 (0.9%) |  |
| T2 | 65 (10.1%) | 46 (7.2%) |  |
| T3 | 211 (32.9%) | 225 (35.1%) |  |
| T4 | 30 (4.7%) | 44 (6.9%) |  |
| N stage, n (%) |  |  | **0.022*** |
| N0 | 201 (31.4%) | 167 (26.1%) |  |
| N1 | 69 (10.8%) | 84 (13.1%) |  |
| N2 | 50 (7.8%) | 69 (10.8%) |  |
| M stage, n (%) |  |  | 0.243 |
| M0 | 238 (42.2%) | 237 (42%) |  |
| M1 | 38 (6.7%) | 51 (9%) |  |
| Pathologic stage, n (%) |  |  | **0.015*** |
| Stage I | 69 (11.1%) | 42 (6.7%) |  |
| Stage II | 122 (19.6%) | 116 (18.6%) |  |
| Stage III | 82 (13.2%) | 102 (16.4%) |  |
| Stage IV | 39 (6.3%) | 51 (8.2%) |  |
| Age, n (%) |  |  | 0.937 |
| <=65 | 139 (21.6%) | 137 (21.3%) |  |
| >65 | 183 (28.4%) | 185 (28.7%) |  |
| Lymphatic invasion, n (%) |  |  | **< 0.001*** |
| No | 200 (34.4%) | 150 (25.8%) |  |
| Yes | 96 (16.5%) | 136 (23.4%) |  |
| Perineural invasion, n (%) |  |  | 0.478 |
| No | 90 (38.3%) | 85 (36.2%) |  |
| Yes | 27 (11.5%) | 33 (14%) |  |
